# Supplementary material
Source: publisher figshare collection journal article supplement (https://gsajournals.figshare.com/articles/dataset/_/12759830)
Supplement: Supplementary file 1 [file 1]

## Sheet: 200718_Supplementary_Data_1
PSI values of alternate sites along with Cluster ID at each timepoint
LSV_ID	Cluster_ID	SS_ID	TP_1	TP_2	TP_3	TP_4	TP_5	TP_6	TP_7	TP_8	TP_9	TP_10	TP_11	TP_11.5	TP_12	TP_12.5	TP_13.5	TP_14	TP_14.5	TP_15	TP_16	TP_17	TP_18	TP_19	TP_20	TP_21	TP_22	TP_23	TP_24
Cre01.g000050.v5.5:t:28291-28644	N7	chromosome_1:28105-28456	0.1404	0.0001	0.0001	0.0828	0.0001	0.0001	0.0933	0.0001	0.0297	0.1276	0.0353	0.0076	0.0561	0.0001	0.0469	0.0976	0.0001	0.0854	0.0991	0.1092	0.025	0.099	0.0533	0.0502	0.1755	0.0471	0.1192
Cre01.g000200.v5.5:s:51317-51525	N7	chromosome_1:51212-51317	0.2202	0.0001	0.0001	0.3176	0.0001	0.0001	0.0001	0.1362	0.0001	0.0001	0.0001	0.1624	0.0001	0.0661	0.0001	0.0867	0.0001	0.0508	0.1408	0.1116	0.0741	0.1603	0.2315	0.0001	0.0628	0.2525	0.076
Cre01.g000450.v5.5:t:67898-68122	N3	chromosome_1:67691-67904	0.0951	0.0001	0.0001	0.0638	0.0001	0.0161	0.0143	0.0364	0.0262	0.0292	0.0505	0.0169	0.0209	0.0781	0.0148	0.0745	0.0001	0.0149	0.0912	0.0001	0.0965	0.1249	0.1465	0.0518	0.0209	0.0254	0.1096
Cre01.g000500.v5.5:t:72641-72998	N3	chromosome_1:72384-72740	0.1237	0.0961	0.1033	0.0498	0.0001	0.0686	0.0107	0.011	0.0001	0.0001	0.0001	0.0001	0.0001	0.0001	0.0001	0.0001	0.0001	0.0001	0.0001	0.0001	0.0001	0.0001	0.0178	0.0001	0.0001	0.0087	0.0091
Cre01.g000650.v5.5:t:92196-92366	N3	chromosome_1:91558-92248	0.0001	0.0001	0.0001	0.0001	0.0001	0.0001	0.0001	0.0001	0.0001	0.0001	0.0001	0.0001	0.0001	0.0001	0.0001	0.1218	0.0001	0.0001	0.2339	0.0179	0.0311	0.0997	0.0609	0.0487	0.0689	0.1051	0.0682
Cre01.g000750.v5.5:s:106113-106829	N3	chromosome_1:105909-106113	0.0001	0.0001	0.0001	0.0001	0.0001	0.0001	0.0001	0.0001	0.0001	0.0001	0.0001	0.0001	0.0001	0.0001	0.0001	0.0001	0.0001	0.0001	0.0001	0.0001	0.0001	0.0001	0.0001	0.0237	0.0001	0.1843	0.0001
Cre01.g000800.v5.5:s:112628-112735	N6	chromosome_1:112372-112628	0.0001	0.4125	0.4406	0.4561	0.3171	0.2554	0.2946	0.4313	0.3549	0.3269	0.3621	0.4716	0.0001	0.0001	0.0001	0.1959	0.1471	0.2224	0.2459	0.3182	0.0001	0.0001	0.2797	0.175	0.0001	0.2039	0.0001
Cre01.g000800.v5.5:s:113731-113935	N2	chromosome_1:113647-113773	0.0001	0.0001	0.0001	0.4235	0.0001	0.0001	0.4663	0.3492	0.3415	0.0001	0.0001	0.4429	0.0001	0.1955	0.0001	0.0001	0.0001	0.5745	0.0001	0.0001	0.0001	0.0001	0.3814	0.0001	0.0001	0.0001	0.0001
Cre01.g001000.v5.5:s:129452-129939	N3	chromosome_1:129356-129452	0.0001	0.0001	0.0001	0.0001	0.0001	0.0001	0.0001	0.0001	0.0001	0.0227	0.2199	0.0637	0.1315	0.0988	0.1316	0.0636	0.2064	0.1248	0.0001	0.1862	0.0001	0.0001	0.0001	0.0001	0.0001	0.0001	0.0001
Cre01.g001300.v5.5:t:204738-205258	N3	chromosome_1:204399-204738	0.0001	0.0001	0.0001	0.0001	0.0001	0.0001	0.0001	0.0001	0.1248	0.0001	0.1383	0.1872	0.0001	0.0389	0.1007	0.0804	0.0001	0.0001	0.0001	0.0001	0.0001	0.0001	0.2363	0.0001	0.0755	0.0731	0.0001
Cre01.g001450.v5.5:s:225012-225416	N3	chromosome_1:225416-225525	0.0001	0.0001	0.0001	0.0001	0.0001	0.0001	0.0001	0.0001	0.0001	0.0001	0.0001	0.0001	0.0001	0.0001	0.0001	0.2143	0.0001	0.0001	0.0001	0.0001	0.0001	0.0001	0.0001	0.0001	0.0001	0.0001	0.0001
Cre01.g001450.v5.5:t:225904-226001	N3	chromosome_1:225670-225904	0.0001	0.0001	0.0001	0.0001	0.0001	0.0001	0.0001	0.0001	0.0001	0.0001	0.0001	0.0001	0.0001	0.0001	0.0001	0.2143	0.0001	0.0001	0.0001	0.0001	0.0001	0.0001	0.0001	0.0001	0.0001	0.0001	0.0001
Cre01.g001800.v5.5:t:316659-316829	N3	chromosome_1:316522-316794	0.1269	0.0001	0.0001	0.1587	0.0001	0.0001	0.0001	0.0904	0.0944	0.1665	0.1709	0.0722	0.1374	0.0087	0.0445	0.0426	0.0072	0.0694	0.0056	0.0056	0.0298	0.0326	0.0369	0.0458	0.0483	0.0122	0.0044
Cre01.g002150.v5.5:t:347360-347560	N3	chromosome_1:347560-347629	0.0001	0.0001	0.0001	0.0001	0.0001	0.0001	0.0001	0.0001	0.0001	0.0843	0.1054	0.0808	0.1775	0.0925	0.081	0.0888	0.0925	0.0724	0.0512	0.0384	0.2291	0.1806	0.0001	0.0001	0.0001	0.0001	0.0001
Cre01.g002227.v5.5:s:361803-361935	N3	chromosome_1:361874-362485	0.0137	0.0001	0.0185	0.0692	0.0001	0.0749	0.0332	0.0245	0.0311	0.0001	0.0253	0.0201	0.0001	0.0001	0.0587	0.0726	0.0239	0.033	0.0502	0.0558	0.0492	0.0153	0.0065	0.0181	0.0139	0.0336	0.0974
Cre01.g002227.v5.5:s:362694-362735	N3	chromosome_1:362735-363039	0.0731	0.0001	0.0001	0.0167	0.0001	0.0159	0.0185	0.0001	0.0001	0.0001	0.0166	0.1174	0.0001	0.0208	0.0619	0.0851	0.0197	0.0434	0.0404	0.0359	0.0352	0.0499	0.0804	0.0455	0.0101	0.0767	0.0111
Cre01.g002227.v5.5:t:362461-362537	N3	chromosome_1:361874-362485	0.0128	0.0001	0.0001	0.1545	0.0001	0.0785	0.0185	0.0001	0.0198	0.0001	0.0001	0.0001	0.0001	0.0001	0.0752	0.0786	0.0158	0.0401	0.0531	0.0782	0.0705	0.0153	0.007	0.0128	0.0123	0.0368	0.1347
Cre01.g002234.v5.5:s:365608-365667	N3	chromosome_1:365649-366138	0.0001	0.0001	0.0001	0.1355	0.0001	0.0001	0.0001	0.0001	0.0001	0.0001	0.0001	0.0001	0.0001	0.0001	0.0001	0.0001	0.0001	0.0726	0.0001	0.0001	0.0001	0.0001	0.0097	0.0001	0.0128	0.0157	0.0001
Cre01.g002861.v5.5:t:520166-520279	N2	chromosome_1:520029-520166	0.0001	0.0001	0.0001	0.0001	0.0001	0.0001	0.0001	0.0001	0.0001	0.0001	0.0001	0.1888	0.1848	0.1337	0.2082	0.3285	0.0001	0.2684	0.3058	0.0001	0.0001	0.0001	0.0001	0.0001	0.0001	0.0001	0.0001
Cre01.g002900.v5.5:s:528680-528815	N3	chromosome_1:528572-528680	0.0001	0.0001	0.0001	0.0001	0.0001	0.0001	0.0001	0.0001	0.0001	0.0001	0.0001	0.0001	0.0001	0.0027	0.0107	0.0069	0.0228	0.0085	0.0072	0.0103	0.0129	0.0039	0.0255	0.0044	0.008	0.0642	0.0001
Cre01.g002900.v5.5:t:528197-528288	N3	chromosome_1:528288-528470	0.0001	0.0001	0.0001	0.038	0.0001	0.0388	0.0001	0.0001	0.0001	0.0001	0.0001	0.0001	0.0001	0.0048	0.017	0.0227	0.027	0.0287	0.012	0.0412	0.0248	0.0422	0.0129	0.0934	0.0464	0.0078	0.0296
Cre01.g003450.v5.5:t:580030-582113	N3	chromosome_1:579922-580061	0.0001	0.0001	0.0001	0.3055	0.0001	0.0001	0.0001	0.0001	0.0001	0.0001	0.0001	0.1542	0.0001	0.0001	0.0001	0.2242	0.0001	0.0001	0.0001	0.0001	0.0001	0.0001	0.1073	0.1574	0.0001	0.0001	0.0001
Cre01.g003650.v5.5:s:698503-698523	N3	chromosome_1:697688-698503	0.0001	0.0001	0.0001	0.0535	0.0001	0.0104	0.0001	0.0447	0.0091	0.0874	0.0228	0.0697	0.0547	0.037	0.1033	0.0527	0.0524	0.0895	0.0366	0.0107	0.0079	0.0356	0.005	0.0125	0.0078	0.0334	0.0125
Cre01.g003650.v5.5:t:697412-697688	N3	chromosome_1:697688-698503	0.0001	0.0001	0.0001	0.048	0.0001	0.0139	0.0001	0.0356	0.0152	0.0802	0.0265	0.0458	0.0397	0.0401	0.0802	0.0426	0.0371	0.1011	0.0282	0.0087	0.009	0.0351	0.0063	0.0095	0.0098	0.0284	0.0105
Cre01.g003950.v5.5:s:758933-760055	N3	chromosome_1:758796-758963	0.0001	0.0001	0.0001	0.5583	0.0001	0.3232	0.0001	0.0001	0.0001	0.0001	0.0001	0.0001	0.0001	0.0001	0.0001	0.0001	0.0001	0.0001	0.0001	0.0001	0.0001	0.0001	0.0001	0.0001	0.0001	0.0001	0.0001
Cre01.g004124.v5.5:s:800703-800810	N3	chromosome_1:800810-801068	0.0001	0.0001	0.0001	0.0001	0.0001	0.0001	0.0001	0.0001	0.0001	0.0191	0.048	0.0626	0.0001	0.04	0.0001	0.1603	0.0001	0.0001	0.0094	0.0001	0.172	0.0001	0.0001	0.0001	0.0694	0.0639	0.0001
Cre01.g004124.v5.5:t:793521-793841	N3	chromosome_1:793331-793527	0.0001	0.0001	0.0001	0.0001	0.0001	0.0001	0.0001	0.0001	0.0001	0.0001	0.0001	0.0001	0.0001	0.5165	0.0001	0.0001	0.0001	0.0001	0.2968	0.0001	0.0001	0.0001	0.0001	0.0001	0.0001	0.0001	0.0001
Cre01.g004124.v5.5:t:796020-796051	N7	chromosome_1:795474-796020	0.0001	0.0001	0.0001	0.0001	0.0001	0.0001	0.0001	0.0001	0.0001	0.0001	0.0001	0.4125	0.0001	0.1655	0.0001	0.4249	0.0001	0.0001	0.0001	0.0001	0.0001	0.0001	0.4148	0.0001	0.0001	0.0001	0.0001
Cre01.g004350.v5.5:s:846673-846794	N7	chromosome_1:846794-846901	0.0829	0.0001	0.0001	0.0501	0.0176	0.0134	0.0392	0.0598	0.0303	0.0096	0.0068	0.0263	0.0278	0.0442	0.1195	0.0931	0.0001	0.1261	0.0682	0.1126	0.0664	0.0495	0.0917	0.2275	0.0564	0.1821	0.1286
Cre01.g004750.v5.5:s:892431-892505	N7	chromosome_1:892505-892681	0.0001	0.0001	0.0001	0.0001	0.0001	0.0001	0.0001	0.0001	0.0001	0.0001	0.0001	0.0001	0.0001	0.1566	0.1625	0.0614	0.0001	0.1856	0.1991	0.195	0.1851	0.1418	0.1278	0.0001	0.0001	0.1723	0.2715
Cre01.g004750.v5.5:t:893025-893093	N3	chromosome_1:892052-893025	0.0001	0.0001	0.0001	0.0001	0.0001	0.0001	0.0001	0.0001	0.0001	0.0001	0.0001	0.0001	0.0001	0.057	0.1149	0.096	0.0001	0.0864	0.1484	0.1645	0.0658	0.1066	0.0594	0.0001	0.0001	0.0573	0.0406
Cre01.g004950.v5.5:s:924296-924444	N3	chromosome_1:923799-924296	0.0131	0.0209	0.0317	0.0153	0.0339	0.0188	0.0251	0.0329	0.0117	0.0153	0.0188	0.0061	0.0123	0.0462	0.0344	0.0252	0.0729	0.0595	0.0144	0.057	0.0103	0.0353	0.031	0.0338	0.0397	0.0229	0.0319
Cre01.g005150.v5.5:s:941696-941885	N2	chromosome_1:941592-941696	0.1801	0.1437	0.1951	0.1759	0.1633	0.1746	0.2146	0.1519	0.145	0.1632	0.2275	0.1627	0.1851	0.1767	0.1609	0.1322	0.1055	0.1762	0.1468	0.1557	0.1344	0.1227	0.1505	0.122	0.118	0.094	0.1438
Cre01.g005400.v5.5:s:973855-973888	N3	chromosome_1:972740-973855	0.0001	0.0001	0.0001	0.0001	0.0001	0.0001	0.0001	0.0001	0.0001	0.0001	0.0001	0.0001	0.0001	0.0653	0.1596	0.0361	0.0501	0.1129	0.0114	0.036	0.0582	0.0001	0.0732	0.0001	0.0001	0.0263	0.0001
Cre01.g005400.v5.5:t:972714-973384	N3	chromosome_1:972740-973855	0.0001	0.0001	0.0001	0.0001	0.0001	0.0001	0.0001	0.0001	0.0001	0.0001	0.0001	0.0001	0.0001	0.0001	0.1637	0.0496	0.0631	0.0687	0.0083	0.0432	0.0628	0.0168	0.0833	0.0001	0.0001	0.0001	0.0001
Cre01.g005813.v5.5:s:1018619-1018675	N3	chromosome_1:1018394-1018619	0.0001	0.0001	0.0001	0.0145	0.0001	0.0001	0.0306	0.0001	0.0001	0.0196	0.0102	0.019	0.0053	0.028	0.0054	0.0049	0.07	0.0452	0.0815	0.0133	0.0001	0.0196	0.0001	0.0001	0.0001	0.0001	0.0001
Cre01.g006000.v5.5:s:1036779-1037787	N7	chromosome_1:1036421-1036784	0.0001	0.0001	0.0001	0.0001	0.0001	0.0001	0.0001	0.0001	0.0001	0.0933	0.0001	0.2209	0.1509	0.1328	0.0512	0.2131	0.1003	0.1054	0.1246	0.1781	0.1545	0.1519	0.1233	0.0853	0.0618	0.116	0.1451
Cre01.g006301.v5.5:t:1094107-1094197	N3	chromosome_1:1094197-1094772	0.0351	0.0001	0.0001	0.0712	0.0001	0.0359	0.0001	0.0001	0.0001	0.0001	0.0001	0.0001	0.0001	0.0001	0.0001	0.0001	0.0001	0.0001	0.0001	0.0001	0.0001	0.0279	0.0869	0.1524	0.0933	0.1795	0.0375
Cre01.g006352.v5.5:s:1096806-1097410	N3	chromosome_1:1096665-1096806	0.2305	0.0001	0.0001	0.1535	0.0001	0.0001	0.0001	0.0001	0.0001	0.0001	0.0001	0.0001	0.0001	0.0001	0.0001	0.0001	0.0001	0.0001	0.0001	0.0001	0.0001	0.0778	0.047	0.0102	0.1608	0.1514	0.101
Cre01.g006352.v5.5:s:1098634-1098774	N7	chromosome_1:1098348-1098634	0.2281	0.0001	0.28	0.0898	0.0001	0.1751	0.0001	0.0001	0.0001	0.0001	0.0001	0.25	0.0001	0.0001	0.0001	0.1755	0.0001	0.0001	0.179	0.0001	0.0001	0.1113	0.1502	0.0997	0.2124	0.1669	0.1806
Cre01.g007774.v5.5:s:1513097-1513187	N3	chromosome_1:1512660-1513097	0.0468	0.1531	0.0448	0.0286	0.0583	0.036	0.0599	0.0934	0.0811	0.044	0.0186	0.097	0.0152	0.1764	0.0308	0.0165	0.0197	0.054	0.0296	0.0485	0.1219	0.0364	0.0051	0.0297	0.0736	0.0399	0.0359
Cre01.g007901.v5.5:s:1528342-1528520	N3	chromosome_1:1528520-1529333	0.0034	0.0001	0.0148	0.0473	0.0001	0.0187	0.0001	0.0185	0.0001	0.0001	0.0001	0.0129	0.0174	0.0609	0.0672	0.0419	0.0001	0.0001	0.0208	0.0001	0.0436	0.0392	0.0855	0.0838	0.0867	0.0808	0.0103
Cre01.g007901.v5.5:t:1525467-1525565	N2	chromosome_1:1525258-1525467	0.0016	0.0001	0.0127	0.0229	0.013	0.0108	0.0455	0.1958	0.1549	0.0001	0.1483	0.0283	0.0749	0.0001	0.2125	0.1913	0.0001	0.1583	0.1077	0.098	0.0935	0.0865	0.1009	0.1325	0.0637	0.0685	0.0674
Cre01.g008100.v5.5:s:1560264-1561025	N3	chromosome_1:1559922-1560264	0.0153	0.0001	0.0001	0.0237	0.0001	0.0001	0.0222	0.0154	0.0301	0.019	0.0001	0.1406	0.0001	0.0001	0.0001	0.0135	0.0001	0.0001	0.0273	0.0001	0.0134	0.0151	0.0114	0.0104	0.0153	0.0072	0.0001
Cre01.g008100.v5.5:t:1559667-1559747	N3	chromosome_1:1559747-1559885	0.0148	0.0001	0.0001	0.0252	0.0001	0.0001	0.021	0.0154	0.0306	0.0175	0.0001	0.1399	0.0001	0.0001	0.0001	0.0132	0.0001	0.0001	0.0278	0.0001	0.0135	0.0149	0.0115	0.0105	0.0151	0.007	0.0001
Cre01.g009250.v5.5:s:1722489-1722575	N3	chromosome_1:1722575-1722714	0.0001	0.0001	0.0001	0.0001	0.0001	0.0001	0.0001	0.0001	0.0001	0.0764	0.1458	0.1251	0.1067	0.0895	0.0822	0.1006	0.0647	0.0998	0.0625	0.0858	0.0983	0.0187	0.0167	0.0254	0.0001	0.0001	0.0001
Cre01.g009325.v5.5:s:1742489-1742894	N3	chromosome_1:1742418-1742544	0.0001	0.0001	0.0001	0.0001	0.0001	0.0001	0.0001	0.0001	0.0001	0.0001	0.0001	0.3235	0.0001	0.0001	0.0001	0.0001	0.0001	0.0001	0.0001	0.0001	0.0001	0.0001	0.0001	0.0001	0.0001	0.0001	0.0001
Cre01.g009700.v5.5:s:1807869-1808026	N3	chromosome_1:1807534-1807869	0.0001	0.0001	0.0001	0.1247	0.0001	0.0001	0.0001	0.0001	0.0001	0.0001	0.0001	0.1075	0.0895	0.1838	0.0001	0.2009	0.0001	0.0782	0.0001	0.0001	0.0001	0.0001	0.0001	0.0001	0.0001	0.0001	0.0001
Cre01.g009800.v5.5:t:1824352-1824491	N7	chromosome_1:1824491-1824699	0.0001	0.0001	0.0001	0.0001	0.0001	0.0001	0.0001	0.0001	0.0001	0.0001	0.0001	0.0001	0.0001	0.0001	0.1234	0.0075	0.0001	0.0972	0.228	0.0638	0.1806	0.0973	0.184	0.0748	0.0102	0.076	0.0416
Cre01.g010201.v5.5:s:1871067-1871156	N3	chromosome_1:1871156-1871279	0.0001	0.0001	0.0001	0.0001	0.0001	0.0001	0.0001	0.0001	0.0335	0.0001	0.0001	0.1095	0.0001	0.0001	0.0001	0.0001	0.0001	0.0001	0.0001	0.0001	0.0001	0.0001	0.0001	0.0001	0.0001	0.0313	0.0001
Cre01.g010201.v5.5:t:1871677-1871772	N3	chromosome_1:1871357-1871677	0.0001	0.0001	0.0001	0.0001	0.0001	0.0001	0.0001	0.0001	0.1927	0.0001	0.0001	0.1468	0.0001	0.0001	0.0001	0.0001	0.0001	0.0001	0.0001	0.0001	0.0001	0.0001	0.0001	0.0001	0.0001	0.0311	0.0001
Cre01.g010800.v5.5:s:1989975-1990475	N2	chromosome_1:1989649-1989975	0.0802	0.1172	0.0826	0.0314	0.0001	0.1911	0.2031	0.1707	0.1966	0.1069	0.0001	0.1484	0.1801	0.0001	0.16	0.175	0.0001	0.0001	0.0001	0.0001	0.1667	0.1532	0.0229	0.12	0.1036	0.0645	0.1203
Cre01.g011400.v5.5:s:2112583-2112802	N2	chromosome_1:2112430-2112583	0.0001	0.0001	0.0001	0.1382	0.0001	0.0833	0.2744	0.1057	0.1107	0.1463	0.2321	0.1727	0.1012	0.093	0.218	0.1873	0.1754	0.1131	0.0196	0.0001	0.1736	0.0001	0.216	0.0001	0.0221	0.0826	0.0001
Cre01.g011750.v5.5:t:2153919-2154037	N3	chromosome_1:2154037-2154319	0.0522	0.0121	0.0101	0.0709	0.01	0.021	0.029	0.0047	0.0315	0.0062	0.0061	0.0049	0.0351	0.038	0.0345	0.0143	0.0055	0.0186	0.004	0.0203	0.0032	0.0228	0.0102	0.0027	0.0028	0.0058	0.004
Cre01.g011800.v5.5:s:2158718-2159216	N3	chromosome_1:2158622-2158718	0.0001	0.0001	0.0001	0.0001	0.0001	0.0001	0.0001	0.0001	0.0001	0.0001	0.0001	0.1154	0.0001	0.0001	0.066	0.0273	0.0001	0.0001	0.0251	0.0001	0.0968	0.1193	0.0837	0.0312	0.0373	0.0185	0.025
Cre01.g011850.v5.5:t:2164006-2164454	N7	chromosome_1:2163689-2164010	0.0758	0.0001	0.0001	0.0001	0.0001	0.0001	0.0001	0.0001	0.0001	0.0001	0.0001	0.0001	0.0001	0.0001	0.0001	0.0001	0.0001	0.0001	0.0001	0.0001	0.0001	0.0938	0.1253	0.1311	0.0626	0.2667	0.0001
Cre01.g012126.v5.5:s:2215518-2215721	N7	chromosome_1:2215677-2215867	0.0001	0.0001	0.0001	0.0001	0.0001	0.0001	0.0001	0.0001	0.0001	0.0001	0.0001	0.0001	0.0001	0.0001	0.0001	0.0001	0.0001	0.0001	0.0001	0.0001	0.0001	0.0001	0.1418	0.0893	0.2386	0.2871	0.1916
Cre01.g012126.v5.5:t:2215972-2216390	N7	chromosome_1:2215930-2216252	0.0001	0.0001	0.0001	0.0001	0.0001	0.0001	0.0001	0.0001	0.0001	0.0001	0.0001	0.0001	0.0001	0.0001	0.0001	0.0001	0.0001	0.0001	0.0001	0.0001	0.0001	0.0001	0.3121	0.1	0.1176	0.2159	0.1702
Cre01.g012126.v5.5:t:2217310-2217469	N7	chromosome_1:2217179-2217310	0.0001	0.0001	0.0001	0.0001	0.0001	0.0001	0.0001	0.0001	0.0001	0.0001	0.0001	0.0001	0.0001	0.0001	0.0001	0.2135	0.0001	0.0001	0.1296	0.0001	0.0828	0.1414	0.1165	0.1231	0.1003	0.0489	0.1837
Cre01.g012200.v5.5:t:2234099-2237669	N7	chromosome_1:2233930-2234102	0.0952	0.0001	0.0001	0.0001	0.0001	0.2222	0.0001	0.1389	0.0001	0.0001	0.0001	0.2337	0.0001	0.0001	0.0001	0.0001	0.0001	0.0245	0.075	0.2462	0.0459	0.0001	0.1365	0.2361	0.1657	0.3602	0.2698
Cre01.g012600.v5.5:s:2303756-2303896	N3	chromosome_1:2303595-2303760	0.0001	0.0001	0.0001	0.0141	0.0157	0.038	0.0074	0.0233	0.0275	0.0365	0.0044	0.0203	0.0126	0.0256	0.0225	0.0216	0.0166	0.0548	0.0084	0.0651	0.064	0.0677	0.0203	0.0752	0.0595	0.0344	0.0001
Cre01.g013000.v5.5:s:2373644-2374567	N3	chromosome_1:2373643-2373971	0.0001	0.0001	0.0001	0.0028	0.1052	0.0046	0.0058	0.0183	0.0094	0.0186	0.0127	0.0136	0.0169	0.0134	0.0152	0.0111	0.0001	0.0001	0.0519	0.0158	0.0447	0.0129	0.0067	0.0054	0.0058	0.0034	0.0045
Cre01.g013000.v5.5:t:2371718-2372238	N3	chromosome_1:2372238-2373115	0.0001	0.0001	0.0849	0.0738	0.1118	0.0952	0.1049	0.158	0.1738	0.0001	0.0001	0.0227	0.1066	0.0115	0.0977	0.0001	0.0001	0.0095	0.0114	0.0001	0.0105	0.0148	0.0051	0.0056	0.0073	0.039	0.0041
Cre01.g013250.v5.5:s:2400714-2400900	N3	chromosome_1:2400572-2400714	0.0001	0.0001	0.0001	0.0088	0.0001	0.0107	0.0001	0.0096	0.0087	0.0062	0.0086	0.0984	0.0057	0.0059	0.0053	0.003	0.0091	0.0027	0.0051	0.0064	0.0052	0.0067	0.0044	0.0059	0.0074	0.0044	0.0111
Cre01.g013250.v5.5:s:2402082-2402196	N7	chromosome_1:2402004-2402082	0.0001	0.0001	0.0001	0.0195	0.0001	0.1236	0.0796	0.043	0.1068	0.0152	0.0313	0.0618	0.056	0.0079	0.0278	0.0882	0.0001	0.0905	0.0087	0.2337	0.1311	0.1502	0.1121	0.0479	0.1173	0.1231	0.0196
Cre01.g013550.v5.5:s:2429614-2430236	N3	chromosome_1:2429484-2429614	0.0417	0.0001	0.0001	0.0137	0.0001	0.0179	0.1309	0.0157	0.0229	0.0602	0.0128	0.024	0.0338	0.0403	0.0083	0.0072	0.0178	0.0552	0.0349	0.0147	0.0113	0.013	0.023	0.0257	0.0555	0.0542	0.0146
Cre01.g013900.v5.5:s:2469623-2469986	N2	chromosome_1:2469511-2469623	0.0557	0.0331	0.1051	0.0731	0.0952	0.1422	0.0216	0.1139	0.0001	0.1832	0.1917	0.3004	0.0001	0.1197	0.0001	0.1588	0.2301	0.0422	0.2425	0.1083	0.1806	0.2125	0.1981	0.1945	0.0439	0.0965	0.1244
Cre01.g014300.v5.5:s:2510074-2510169	N6	chromosome_1:2509858-2510074	0.5092	0.2896	0.3756	0.3117	0.2058	0.2034	0.1726	0.2303	0.2335	0.2414	0.2293	0.3471	0.3453	0.176	0.2567	0.0896	0.0001	0.1206	0.143	0.2458	0.1105	0.0001	0.1417	0.1225	0.0001	0.0449	0.0001
Cre01.g014300.v5.5:t:2507632-2507686	N1	chromosome_1:2507686-2508107	0.4379	0.3522	0.6415	0.4987	0.4931	0.5426	0.5911	0.5469	0.5501	0.3444	0.5101	0.4444	0.4633	0.4014	0.4336	0.4213	0.0001	0.3041	0.3133	0.0001	0.0001	0.3505	0.3948	0.0001	0.0001	0.2592	0.0001
Cre01.g014350.v5.5:t:2512449-2512559	N3	chromosome_1:2512171-2512449	0.0143	0.0018	0.0117	0.0135	0.0015	0.0164	0.0006	0.0052	0.0126	0.0128	0.0008	0.0087	0.0177	0.0203	0.0138	0.0015	0.0032	0.0019	0.0587	0.0035	0.0048	0.0647	0.0027	0.0045	0.0063	0.0045	0.0074
Cre01.g014650.v5.5:t:2542768-2542994	N3	chromosome_1:2542586-2542904	0.0704	0.0159	0.0614	0.0348	0.0138	0.0077	0.0521	0.0419	0.094	0.0509	0.0978	0.0491	0.0067	0.0545	0.0226	0.0157	0.0088	0.0031	0.004	0.0042	0.0055	0.023	0.0144	0.005	0.0066	0.0033	0.0072
Cre01.g014950.v5.5:t:2569429-2569712	N4	chromosome_1:2569319-2569429	0.0001	0.0001	0.2281	0.1723	0.0239	0.1051	0.0001	0.1063	0.1194	0.0001	0.3708	0.3775	0.0001	0.2678	0.1398	0.2475	0.0001	0.285	0.1627	0.0001	0.4651	0.2362	0.2172	0.2666	0.3474	0.3711	0.2604
Cre01.g015650.v5.5:s:2672010-2672766	N3	chromosome_1:2671717-2672010	0.0841	0.0416	0.0152	0.0118	0.0001	0.0275	0.0001	0.0701	0.028	0.0739	0.049	0.0065	0.041	0.1298	0.0636	0.0878	0.1763	0.0767	0.0434	0.039	0.012	0.0993	0.0421	0.1083	0.0537	0.0706	0.0388
Cre01.g015700.v5.5:s:2674455-2674520	N3	chromosome_1:2674202-2674490	0.0172	0.0001	0.1244	0.014	0.0001	0.0001	0.0001	0.0001	0.0938	0.0001	0.0001	0.026	0.0001	0.0001	0.0625	0.0699	0.0649	0.0533	0.0631	0.0456	0.0665	0.0121	0.066	0.0321	0.0166	0.0394	0.016
Cre01.g015750.v5.5:s:2677177-2677359	N3	chromosome_1:2677359-2677489	0.0001	0.0001	0.0555	0.0065	0.0186	0.0394	0.0102	0.0081	0.0108	0.0546	0.0519	0.0205	0.0632	0.0328	0.0124	0.012	0.0065	0.009	0.0039	0.0061	0.0058	0.0049	0.0365	0.0494	0.0171	0.003	0.005
Cre01.g015750.v5.5:t:2677822-2677879	N3	chromosome_1:2677526-2677822	0.0001	0.054	0.0556	0.0226	0.0303	0.0584	0.0705	0.0606	0.0723	0.0273	0.0518	0.0638	0.0433	0.0297	0.0238	0.0362	0.0071	0.0246	0.0655	0.0433	0.0392	0.0077	0.0456	0.0054	0.037	0.0025	0.0338
Cre01.g016700.v5.5:t:2815047-2815197	N3	chromosome_1:2814559-2815144	0.1603	0.0001	0.0606	0.1743	0.0001	0.0841	0.245	0.2564	0.0001	0.0001	0.0001	0.0001	0.0001	0.0001	0.0001	0.0001	0.0001	0.0001	0.0001	0.0001	0.0001	0.0001	0.0001	0.0001	0.0001	0.0001	0.0001
Cre01.g016700.v5.5:t:2815627-2816205	N3	chromosome_1:2814559-2815627	0.1021	0.0001	0.0606	0.2571	0.0929	0.192	0.1658	0.0963	0.1819	0.0001	0.0001	0.0001	0.0001	0.0001	0.0001	0.0001	0.0001	0.0001	0.0001	0.0001	0.0001	0.0001	0.0001	0.0001	0.0001	0.0001	0.0001
Cre01.g017200.v5.5:s:2859675-2859781	N3	chromosome_1:2858752-2859675	0.0459	0.0001	0.0001	0.0494	0.0001	0.0265	0.0718	0.0226	0.079	0.0177	0.0151	0.1549	0.017	0.0156	0.0208	0.0113	0.0001	0.0206	0.0257	0.0001	0.025	0.0001	0.0149	0.0202	0.0161	0.0094	0.0239
Cre01.g017200.v5.5:t:2858620-2858752	N3	chromosome_1:2858752-2859675	0.0001	0.0001	0.0001	0.0353	0.0001	0.0001	0.075	0.0158	0.0557	0.0195	0.0179	0.133	0.0152	0.0172	0.025	0.0153	0.0001	0.0192	0.0138	0.024	0.0216	0.0001	0.0131	0.0147	0.0111	0.0127	0.0001
Cre01.g017250.v5.5:s:2863367-2863444	N3	chromosome_1:2863031-2863367	0.0285	0.0001	0.0001	0.017	0.0001	0.0001	0.0001	0.0001	0.1667	0.0127	0.0107	0.0052	0.0601	0.061	0.0079	0.0506	0.0118	0.0064	0.011	0.0099	0.047	0.0001	0.0091	0.076	0.0185	0.0132	0.0126
Cre01.g017550.v5.5:s:2884403-2884697	N3	chromosome_1:2884697-2884814	0.074	0.0001	0.0001	0.0278	0.0001	0.0001	0.0001	0.0001	0.0001	0.0001	0.0001	0.021	0.0001	0.0001	0.0001	0.0118	0.0001	0.0138	0.0183	0.0177	0.0223	0.0113	0.0104	0.0167	0.0001	0.006	0.0097
Cre01.g018075.v5.5:t:2958931-2959097	N3	chromosome_1:2958811-2959054	0.0949	0.0001	0.0001	0.0768	0.0001	0.0967	0.0694	0.0001	0.0001	0.0392	0.0001	0.0471	0.0184	0.0584	0.0627	0.0416	0.114	0.0119	0.0249	0.0057	0.019	0.0271	0.0053	0.0063	0.026	0.0363	0.0099
Cre01.g018075.v5.5:t:2959825-2960298	N3	chromosome_1:2959534-2959825	0.0292	0.0001	0.0001	0.0812	0.0001	0.075	0.0001	0.0001	0.0413	0.0001	0.0311	0.0123	0.0439	0.0135	0.0059	0.0047	0.0303	0.0045	0.0065	0.0061	0.0066	0.0066	0.0048	0.0066	0.0073	0.0051	0.0085
Cre01.g018200.v5.5:s:2972802-2973099	N2	chromosome_1:2972597-2972802	0.0287	0.115	0.1086	0.2123	0.0001	0.0501	0.0248	0.0844	0.086	0.1821	0.0727	0.0818	0.1136	0.0757	0.0357	0.1146	0.0742	0.0499	0.0989	0.0001	0.157	0.1442	0.0957	0.052	0.037	0.0237	0.0861
Cre01.g018600.v5.5:t:3019942-3020129	N3	chromosome_1:3019817-3019942	0.1073	0.0132	0.0443	0.0584	0.0271	0.0488	0.0237	0.0043	0.0564	0.1075	0.041	0.0254	0.0612	0.0129	0.0223	0.024	0.0032	0.0384	0.0023	0.0034	0.0367	0.0608	0.0286	0.0079	0.0896	0.0267	0.1419
Cre01.g018900.v5.5:t:3060998-3061460	N3	chromosome_1:3060778-3060998	0.1877	0.0001	0.0001	0.0001	0.0001	0.0001	0.0001	0.0001	0.0001	0.0001	0.0001	0.0001	0.0001	0.0001	0.0001	0.0185	0.0001	0.0278	0.0242	0.0001	0.0001	0.0001	0.0001	0.0001	0.0758	0.0211	0.0001
Cre01.g019000.v5.5:s:3070767-3070816	N2	chromosome_1:3070196-3070767	0.0001	0.0001	0.2293	0.0439	0.0217	0.2074	0.1973	0.1404	0.1	0.1617	0.2138	0.1471	0.0001	0.0001	0.0001	0.0001	0.0001	0.0001	0.0001	0.0001	0.0001	0.0001	0.3403	0.0001	0.0001	0.0001	0.0001
Cre01.g019000.v5.5:t:3069261-3070196	N2	chromosome_1:3070196-3070767	0.0001	0.0001	0.2201	0.029	0.0093	0.1781	0.161	0.1587	0.1192	0.2024	0.2505	0.1041	0.1463	0.0001	0.0001	0.0001	0.0001	0.0001	0.0001	0.0001	0.0001	0.0001	0.2072	0.0001	0.0001	0.2685	0.0659
Cre01.g020050.v5.5:t:3195520-3195671	N3	chromosome_1:3195381-3195520	0.0001	0.0001	0.0001	0.0001	0.0001	0.0001	0.0001	0.0001	0.0001	0.0001	0.133	0.0507	0.1599	0.1067	0.0818	0.0864	0.0185	0.0416	0.2048	0.0219	0.0291	0.0001	0.0001	0.0001	0.0001	0.0001	0.0001
Cre01.g021150.v5.5:t:3350369-3350554	N2	chromosome_1:3349668-3350369	0.0089	0.0174	0.0159	0.1583	0.242	0.2967	0.3727	0.4891	0.3459	0.2815	0.2585	0.1431	0.1701	0.2917	0.16	0.1009	0.0747	0.0792	0.0445	0.0383	0.0341	0.0549	0.0105	0.0268	0.019	0.0796	0.0431
Cre01.g021450.v5.5:s:3372763-3372870	N2	chromosome_1:3372870-3373144	0.4603	0.0001	0.0001	0.3431	0.0001	0.0001	0.0001	0.3399	0.49	0.2988	0.4481	0.5268	0.5293	0.0001	0.0001	0.0001	0.0001	0.0001	0.0001	0.0001	0.0001	0.0001	0.0001	0.0001	0.0001	0.0001	0.0001
Cre01.g021450.v5.5:t:3373559-3373684	N6	chromosome_1:3372870-3373559	0.4929	0.0001	0.0001	0.5847	0.0001	0.4094	0.4095	0.5129	0.419	0.541	0.4835	0.3712	0.461	0.2236	0.0001	0.0001	0.0001	0.0001	0.0001	0.0001	0.0001	0.0001	0.0001	0.0001	0.0001	0.0001	0.0001
Cre01.g021700.v5.5:t:3400323-3400583	N3	chromosome_1:3400208-3400482	0.0278	0.0417	0.0001	0.0178	0.0001	0.0001	0.0001	0.0001	0.0001	0.0001	0.0001	0.1385	0.0001	0.0221	0.0122	0.0066	0.0386	0.0278	0.0168	0.0065	0.0109	0.0094	0.0117	0.0077	0.0079	0.0016	0.0209
Cre01.g022283.v5.5:t:3496601-3496777	N7	chromosome_1:3496447-3496601	0.2786	0.0822	0.0001	0.0001	0.0001	0.0001	0.0001	0.0001	0.1154	0.0001	0.0001	0.0179	0.37	0.0001	0.1608	0.1822	0.0001	0.1342	0.2088	0.1842	0.195	0.0557	0.1366	0.0001	0.2381	0.2253	0.0001
Cre01.g022600.v5.5:t:3528170-3528619	N7	chromosome_1:3527981-3528170	0.0965	0.1085	0.0269	0.0334	0.0133	0.045	0.0338	0.043	0.0529	0.1179	0.0866	0.1061	0.1062	0.1004	0.041	0.1206	0.1413	0.1443	0.0798	0.1741	0.1167	0.1404	0.1266	0.1367	0.1602	0.1217	0.1421
Cre01.g022681.v5.5:t:3534513-3534588	N7	chromosome_1:3534275-3534513	0.0001	0.0001	0.0001	0.0001	0.0001	0.0001	0.0001	0.0001	0.0001	0.0001	0.0001	0.0001	0.0001	0.0001	0.0001	0.0001	0.0001	0.5235	0.1938	0.0001	0.0001	0.0001	0.4967	0.0001	0.0001	0.302	0.0001
Cre01.g023050.v5.5:t:3584599-3584688	N3	chromosome_1:3584446-3584599	0.0001	0.0188	0.0132	0.0698	0.0145	0.0107	0.0295	0.008	0.0321	0.006	0.0046	0.013	0.0061	0.0088	0.0103	0.0061	0.0001	0.0072	0.0336	0.0168	0.0099	0.0132	0.0078	0.016	0.0001	0.0274	0.0001
Cre01.g023750.v5.5:s:3691479-3691617	N3	chromosome_1:3691118-3691479	0.0001	0.0001	0.0001	0.3163	0.0001	0.0554	0.1498	0.0445	0.1094	0.1457	0.0561	0.0732	0.1213	0.056	0.0001	0.0867	0.0001	0.1168	0.0001	0.0001	0.0001	0.0001	0.0001	0.0001	0.0001	0.0001	0.0001
Cre01.g025300.v5.5:s:3889527-3889652	N3	chromosome_1:3889294-3889560	0.0001	0.0001	0.0001	0.0001	0.0001	0.0001	0.0001	0.0001	0.0001	0.0334	0.0629	0.1872	0.0001	0.0571	0.0861	0.022	0.0001	0.0992	0.0001	0.0001	0.0001	0.0001	0.0001	0.0001	0.0001	0.0001	0.0001
Cre01.g026150.v5.5:t:4024295-4024780	N3	chromosome_1:4024163-4024295	0.0546	0.0001	0.0294	0.2132	0.0001	0.0218	0.0001	0.0224	0.0277	0.0001	0.0263	0.0132	0.0001	0.0001	0.0294	0.0193	0.0001	0.0192	0.0342	0.0833	0.0357	0.0001	0.0179	0.025	0.1037	0.065	0.0001
Cre01.g026450.v5.5:s:4056263-4056345	N7	chromosome_1:4056059-4056263	0.0155	0.0177	0.0118	0.0043	0.0102	0.0241	0.0061	0.0103	0.0029	0.0026	0.0059	0.0027	0.0082	0.0099	0.0158	0.0086	0.0195	0.0252	0.0263	0.0468	0.0322	0.0296	0.1348	0.1031	0.1627	0.1495	0.1247
Cre01.g026500.v5.5:s:4059269-4059444	N3	chromosome_1:4059084-4059269	0.0001	0.0001	0.0001	0.0001	0.0001	0.0001	0.0001	0.0001	0.0001	0.0001	0.1816	0.0256	0.0655	0.0516	0.1022	0.0978	0.1256	0.0984	0.1262	0.0914	0.104	0.0001	0.0001	0.0001	0.0001	0.0295	0.0001
Cre01.g027050.v5.5:s:4116504-4116608	N3	chromosome_1:4116294-4116504	0.0137	0.0314	0.0281	0.015	0.0534	0.0241	0.0029	0.016	0.0029	0.016	0.0349	0.0207	0.0144	0.0239	0.0161	0.0266	0.0158	0.0103	0.0164	0.0087	0.0083	0.0052	0.0263	0.0017	0.0184	0.018	0.0177
Cre01.g027350.v5.5:s:4157607-4157691	N3	chromosome_1:4157349-4157607	0.0001	0.0001	0.0001	0.0001	0.0001	0.0001	0.0001	0.0001	0.0001	0.0001	0.0001	0.6891	0.0001	0.0001	0.2358	0.0001	0.0001	0.0001	0.0001	0.0001	0.0001	0.0001	0.0001	0.0001	0.0001	0.0001	0.0001
Cre01.g027450.v5.5:s:4165169-4165425	N3	chromosome_1:4164983-4165169	0.0193	0.0722	0.026	0.0164	0.0146	0.0103	0.008	0.009	0.0712	0.0093	0.005	0.0132	0.0052	0.0305	0.0093	0.0178	0.0118	0.0573	0.0391	0.0305	0.046	0.0261	0.0282	0.0477	0.0308	0.0042	0.0075
Cre01.g028101.v5.5:s:4218100-4218178	N3	chromosome_1:4217813-4218100	0.0001	0.0001	0.0001	0.0535	0.0001	0.019	0.0199	0.0097	0.0717	0.0143	0.0107	0.0482	0.012	0.0262	0.0457	0.0306	0.067	0.0445	0.0199	0.0155	0.0395	0.0356	0.0186	0.0676	0.0222	0.0299	0.0209
Cre01.g028350.v5.5:s:4234342-4234413	N3	chromosome_1:4234413-4234954	0.0001	0.0303	0.0134	0.0567	0.0866	0.0701	0.0815	0.048	0.0894	0.0634	0.0542	0.0569	0.0515	0.0001	0.0001	0.1505	0.0001	0.2288	0.0001	0.0001	0.0001	0.0001	0.1395	0.0001	0.0001	0.0001	0.0001
Cre01.g028350.v5.5:t:4234954-4235019	N3	chromosome_1:4234413-4234954	0.0229	0.0176	0.0148	0.0548	0.0837	0.0513	0.0583	0.0431	0.0888	0.0521	0.0505	0.0472	0.0773	0.0001	0.0001	0.0001	0.0001	0.2136	0.1172	0.1086	0.0001	0.1131	0.1266	0.0001	0.0227	0.0001	0.0001
Cre01.g029000.v5.5:s:4302382-4302632	N3	chromosome_1:4302632-4303206	0.0665	0.0001	0.0001	0.0001	0.0001	0.0001	0.0001	0.0001	0.0001	0.0001	0.0001	0.0067	0.0001	0.0001	0.0001	0.0001	0.0001	0.0001	0.0744	0.0001	0.0001	0.0001	0.0001	0.0227	0.0001	0.0001	0.0001
Cre01.g029050.v5.5:s:4306893-4307102	N3	chromosome_1:4306816-4306893	0.0065	0.0001	0.0528	0.0201	0.0184	0.0825	0.0109	0.0077	0.0646	0.0697	0.0503	0.0555	0.0115	0.0516	0.0402	0.044	0.0534	0.0487	0.0427	0.0199	0.0445	0.0146	0.0604	0.0211	0.0334	0.0423	0.0741
Cre01.g029600.v5.5:s:4376239-4376409	N7	chromosome_1:4375932-4376277	0.0001	0.0001	0.0001	0.197	0.0001	0.0001	0.0001	0.1603	0.0948	0.0001	0.0001	0.146	0.0001	0.0001	0.0001	0.1148	0.0001	0.0111	0.1289	0.1111	0.1369	0.0702	0.1026	0.0517	0.1454	0.0513	0.0001
Cre01.g030300.v5.5:s:4455453-4455794	N4	chromosome_1:4455794-4456047	0.0001	0.0001	0.0001	0.2217	0.0001	0.2145	0.1854	0.1147	0.0001	0.0001	0.0001	0.1011	0.0579	0.2907	0.1854	0.2688	0.1905	0.1374	0.3414	0.1875	0.2688	0.4068	0.3764	0.3658	0.5272	0.2591	0.4071
Cre01.g030300.v5.5:t:4456294-4456448	N4	chromosome_1:4456097-4456294	0.0001	0.0001	0.0001	0.1435	0.0001	0.2528	0.1398	0.0712	0.0001	0.0001	0.0001	0.2064	0.0573	0.2561	0.0852	0.2319	0.1609	0.1815	0.3272	0.2778	0.2679	0.3049	0.3286	0.3775	0.5528	0.2757	0.3923
Cre01.g030450.v5.5:t:4474935-4475192	N3	chromosome_1:4474747-4474935	0.0303	0.0001	0.0145	0.0073	0.0001	0.0168	0.0111	0.0326	0.0071	0.0092	0.0061	0.0047	0.0317	0.0075	0.0111	0.0219	0.0553	0.0064	0.0075	0.0131	0.0719	0.0311	0.0248	0.0104	0.0546	0.0589	0.0093
Cre01.g030950.v5.5:s:4537031-4537117	N3	chromosome_1:4537117-4537500	0.0055	0.0345	0.0563	0.065	0.0415	0.0073	0.042	0.0228	0.0483	0.0768	0.0501	0.0175	0.041	0.0171	0.04	0.0516	0.0324	0.023	0.009	0.0107	0.0293	0.0044	0.0148	0.0052	0.0416	0.0187	0.0386
Cre01.g031850.v5.5:t:4629971-4630338	N3	chromosome_1:4629526-4629971	0.0001	0.0001	0.0001	0.0454	0.0262	0.0294	0.0001	0.0209	0.026	0.0197	0.0833	0.0523	0.0586	0.0375	0.0135	0.028	0.0208	0.0282	0.0296	0.0208	0.0189	0.0209	0.0147	0.0201	0.017	0.0121	0.0001
Cre01.g031850.v5.5:t:4630567-4631275	N3	chromosome_1:4630228-4630567	0.0001	0.0669	0.0001	0.0139	0.0001	0.0608	0.0001	0.0167	0.0095	0.0607	0.0076	0.1624	0.0086	0.0443	0.0448	0.1153	0.0001	0.0431	0.0725	0.0001	0.0175	0.0145	0.0073	0.0103	0.0102	0.099	0.0167
Cre01.g032600.v5.5:t:4728849-4728937	N6	chromosome_1:4728686-4728849	0.2301	0.3058	0.3047	0.302	0.1738	0.2618	0.2959	0.3281	0.2592	0.2841	0.2205	0.351	0.2345	0.2774	0.2931	0.332	0.2923	0.3017	0.3384	0.3944	0.2967	0.3575	0.346	0.4338	0.3145	0.34	0.4048
Cre01.g032650.v5.5:s:4733112-4733382	N3	chromosome_1:4732887-4733112	0.0001	0.0001	0.0001	0.0001	0.0001	0.0001	0.0001	0.0001	0.0001	0.0305	0.1149	0.0166	0.0207	0.032	0.0577	0.0564	0.0399	0.0325	0.0154	0.0466	0.0747	0.0679	0.0582	0.0543	0.0646	0.0729	0.0569
Cre01.g032900.v5.5:s:4760802-4760843	N3	chromosome_1:4760843-4761647	0.0001	0.0001	0.0001	0.0051	0.0001	0.0001	0.0001	0.0001	0.0001	0.0143	0.0001	0.0088	0.0849	0.0265	0.0589	0.0473	0.0078	0.0524	0.0269	0.0622	0.0708	0.0053	0.033	0.068	0.0422	0.1099	0.0039
Cre01.g032900.v5.5:s:4762913-4763140	N7	chromosome_1:4763090-4763316	0.0001	0.0001	0.0001	0.2283	0.0001	0.0001	0.0001	0.0001	0.0001	0.0001	0.0001	0.2469	0.0001	0.1946	0.0909	0.1063	0.0001	0.148	0.0962	0.1356	0.0813	0.0684	0.117	0.0477	0.1716	0.0922	0.056
Cre01.g032900.v5.5:s:4763316-4763431	N7	chromosome_1:4763431-4763523	0.0001	0.0001	0.0001	0.0187	0.0001	0.0001	0.0001	0.0238	0.0001	0.0001	0.0784	0.0257	0.0001	0.1334	0.0558	0.1136	0.0001	0.2067	0.1826	0.0476	0.0907	0.101	0.0949	0.0771	0.177	0.0827	0.0629
Cre01.g032900.v5.5:t:4763779-4763883	N7	chromosome_1:4763695-4763779	0.0001	0.0001	0.0001	0.1178	0.0001	0.0001	0.0001	0.0238	0.0001	0.0001	0.0208	0.0976	0.0001	0.1352	0.0146	0.0741	0.0001	0.0742	0.0724	0.0122	0.1354	0.1753	0.0667	0.1387	0.1297	0.1234	0.0633
Cre01.g033091.v5.5:s:4792031-4792222	N3	chromosome_1:4791624-4792031	0.0303	0.0001	0.0001	0.017	0.0001	0.0222	0.0001	0.0183	0.0001	0.0159	0.0124	0.0111	0.0151	0.0299	0.0089	0.0172	0.0001	0.007	0.0742	0.0157	0.0059	0.0065	0.0363	0.0125	0.1565	0.093	0.0101
Cre01.g034100.v5.5:s:4921884-4922110	N3	chromosome_1:4921971-4922303	0.0001	0.0001	0.0001	0.1026	0.0001	0.0001	0.0001	0.0001	0.0001	0.0001	0.2819	0.1882	0.0001	0.0001	0.0001	0.1756	0.0001	0.179	0.0001	0.0001	0.0001	0.0001	0.0001	0.0001	0.0001	0.0001	0.0001
Cre01.g034100.v5.5:t:4922716-4922897	N3	chromosome_1:4922516-4922716	0.0001	0.0001	0.0001	0.028	0.0001	0.0001	0.0001	0.0001	0.0001	0.0001	0.0167	0.111	0.0001	0.0001	0.0001	0.016	0.0001	0.0209	0.0001	0.0001	0.0001	0.0001	0.0001	0.0001	0.0001	0.0001	0.0001
Cre01.g034900.v5.5:s:5047572-5047804	N3	chromosome_1:5047804-5048146	0.0334	0.0001	0.0001	0.0001	0.0001	0.0001	0.0001	0.0001	0.0001	0.0001	0.0785	0.0264	0.0001	0.0001	0.0253	0.1349	0.0001	0.0964	0.0683	0.0001	0.0001	0.0001	0.0509	0.0236	0.0001	0.0488	0.0536
Cre01.g034900.v5.5:t:5048146-5048233	N3	chromosome_1:5047804-5048146	0.0417	0.0001	0.0001	0.0001	0.0001	0.0001	0.0001	0.0001	0.0001	0.0001	0.0559	0.0208	0.0001	0.0001	0.025	0.0993	0.0001	0.1099	0.0573	0.1925	0.0266	0.0001	0.0417	0.0218	0.0001	0.0516	0.0417
Cre01.g035150.v5.5:s:5073210-5073376	N3	chromosome_1:5072750-5073210	0.0118	0.0303	0.021	0.0321	0.0213	0.0001	0.063	0.0556	0.0303	0.0175	0.0147	0.1027	0.0111	0.1667	0.0167	0.0159	0.0001	0.0105	0.0223	0.0001	0.0176	0.0001	0.0533	0.0737	0.0185	0.0129	0.0001
Cre01.g036200.v5.5:s:5200452-5200712	N3	chromosome_1:5200712-5201134	0.0285	0.0001	0.0071	0.0039	0.0001	0.0054	0.0278	0.0427	0.0323	0.0307	0.0054	0.0027	0.0047	0.0034	0.0028	0.0495	0.026	0.0125	0.0623	0.0249	0.0649	0.0319	0.0492	0.1213	0.1027	0.0406	0.0832
Cre01.g036200.v5.5:t:5201478-5201585	N3	chromosome_1:5201205-5201478	0.0058	0.0001	0.0071	0.0038	0.0001	0.0267	0.0057	0.005	0.0065	0.0062	0.0256	0.0026	0.0047	0.0035	0.014	0.0319	0.0461	0.0528	0.0495	0.0613	0.0655	0.0173	0.0415	0.079	0.0631	0.0311	0.0521
Cre01.g036250.v5.5:s:5211866-5211970	N7	chromosome_1:5211698-5211866	0.0001	0.0001	0.0001	0.1849	0.0001	0.0712	0.0882	0.0968	0.0001	0.0001	0.0001	0.0574	0.0001	0.1205	0.1287	0.1079	0.0001	0.0441	0.1077	0.1003	0.0508	0.0977	0.0783	0.0736	0.0654	0.0705	0.093
Cre01.g036900.v5.5:s:5284256-5284546	N3	chromosome_1:5283799-5284305	0.0076	0.0166	0.0001	0.0638	0.0001	0.0001	0.0001	0.2178	0.0001	0.0001	0.0001	0.0108	0.0001	0.0001	0.0124	0.009	0.0001	0.0104	0.0552	0.0125	0.0114	0.0001	0.0256	0.0375	0.0584	0.0446	0.0089
Cre01.g037000.v5.5:t:5294665-5294743	N2	chromosome_1:5294488-5294665	0.0001	0.0001	0.0001	0.3393	0.0001	0.227	0.1056	0.0924	0.209	0.2927	0.3716	0.1623	0.2485	0.0001	0.0001	0.1197	0.0001	0.1449	0.1656	0.0001	0.0001	0.0001	0.1733	0.0001	0.0001	0.2816	0.0001
Cre01.g037000.v5.5:t:5295325-5295460	N3	chromosome_1:5295131-5295325	0.0136	0.0135	0.0077	0.01	0.0061	0.0194	0.0102	0.0023	0.0031	0.0369	0.0043	0.0205	0.0564	0.0076	0.0114	0.0065	0.0167	0.0058	0.0111	0.015	0.0152	0.0115	0.0073	0.0093	0.0098	0.0055	0.0119
Cre01.g037050.v5.5:s:5296273-5296686	N2	chromosome_1:5296686-5296856	0.1477	0.0001	0.2358	0.0554	0.1257	0.0583	0.1117	0.059	0.0991	0.054	0.0808	0.0662	0.0981	0.11	0.0398	0.0821	0.0118	0.1907	0.2252	0.175	0.0628	0.0966	0.1396	0.1433	0.0486	0.1205	0.0001
Cre01.g037150.v5.5:t:5312931-5314277	N3	chromosome_1:5314277-5314435	0.0895	0.0352	0.0001	0.011	0.0451	0.0168	0.0185	0.0219	0.0245	0.0227	0.0219	0.0203	0.0338	0.0001	0.0001	0.0227	0.0001	0.0253	0.0001	0.0001	0.0001	0.0001	0.0259	0.0242	0.022	0.0549	0.0001
Cre01.g037350.v5.5:s:5327054-5327189	N3	chromosome_1:5326953-5327054	0.0001	0.0001	0.0001	0.0202	0.0001	0.0001	0.0792	0.0238	0.0962	0.0001	0.0001	0.0207	0.0864	0.0231	0.0001	0.0939	0.0278	0.0401	0.0817	0.0001	0.0001	0.0649	0.0618	0.0209	0.024	0.1244	0.0799
Cre01.g038151.v5.5:s:5439999-5440127	N3	chromosome_1:5439640-5439999	0.0001	0.0001	0.0001	0.0001	0.0001	0.0001	0.0001	0.0001	0.0673	0.0334	0.0453	0.0245	0.0295	0.0898	0.0433	0.0432	0.0144	0.0095	0.0582	0.0001	0.0162	0.0001	0.0161	0.0207	0.0177	0.0109	0.0158
Cre01.g038151.v5.5:t:5439380-5439640	N3	chromosome_1:5439640-5439999	0.0001	0.0001	0.0001	0.0001	0.0001	0.0001	0.0001	0.0001	0.0001	0.062	0.1134	0.1003	0.0649	0.1179	0.063	0.0568	0.031	0.0227	0.1071	0.0001	0.0001	0.0001	0.0001	0.0296	0.0001	0.0294	0.0001
Cre01.g038700.v5.5:t:5493611-5493684	N3	chromosome_1:5493158-5493611	0.2288	0.0001	0.025	0.0455	0.0001	0.0412	0.1495	0.0127	0.046	0.0342	0.02	0.0367	0.025	0.0142	0.0365	0.0094	0.0217	0.0195	0.0144	0.0652	0.0001	0.0281	0.0134	0.017	0.0139	0.0084	0.0152
Cre01.g039702.v5.5:s:5593439-5593528	N4	chromosome_1:5591856-5593439	0.0001	0.0001	0.0001	0.0001	0.0001	0.0001	0.0001	0.0001	0.0001	0.0001	0.0001	0.4053	0.0001	0.0001	0.0001	0.4728	0.0001	0.4708	0.5212	0.0001	0.0001	0.0001	0.5474	0.6222	0.0001	0.4566	0.0001
Cre01.g039950.v5.5:s:5626521-5626883	N3	chromosome_1:5626341-5626521	0.0481	0.0001	0.034	0.0279	0.0086	0.0254	0.0921	0.0356	0.1004	0.0854	0.1079	0.0381	0.0514	0.0905	0.0484	0.0494	0.0001	0.1173	0.1182	0.0784	0.085	0.0343	0.0522	0.0614	0.04	0.0557	0.0049
Cre01.g040701.v5.5:t:5713361-5713449	N3	chromosome_1:5713290-5713361	0.0728	0.0138	0.0305	0.0355	0.0983	0.0177	0.0232	0.0346	0.0286	0.0421	0.0187	0.0475	0.0595	0.0462	0.0226	0.0398	0.056	0.0203	0.0271	0.0243	0.0138	0.0175	0.0321	0.0321	0.0147	0.0219	0.0348
Cre01.g041150.v5.5:s:5760706-5760816	N7	chromosome_1:5760798-5760960	0.0001	0.0001	0.0001	0.0127	0.0001	0.0001	0.0001	0.0001	0.0001	0.0001	0.0001	0.0435	0.0001	0.049	0.1324	0.1874	0.1084	0.0001	0.0473	0.0772	0.1384	0.1229	0.1245	0.0757	0.0439	0.1466	0.0542
Cre01.g041150.v5.5:s:5763851-5765538	N3	chromosome_1:5765538-5765700	0.0001	0.0001	0.0001	0.0455	0.0001	0.0001	0.0001	0.0251	0.0001	0.0001	0.0001	0.0157	0.0001	0.0264	0.018	0.0397	0.0333	0.0132	0.02	0.0547	0.058	0.0978	0.0299	0.0234	0.0315	0.0558	0.0286
Cre01.g041150.v5.5:t:5761344-5761454	N7	chromosome_1:5761066-5761344	0.0001	0.0001	0.0001	0.2477	0.0001	0.0001	0.0001	0.0001	0.0001	0.0001	0.0001	0.0097	0.0001	0.1644	0.1705	0.224	0.1536	0.0001	0.1197	0.1418	0.1118	0.1832	0.2024	0.0789	0.0653	0.1658	0.1608
Cre01.g041256.v5.5:s:5775678-5775904	N7	chromosome_1:5775904-5776008	0.0001	0.0001	0.0001	0.0001	0.0001	0.0001	0.0001	0.0001	0.0001	0.0001	0.0001	0.2498	0.0001	0.0001	0.0001	0.0001	0.0001	0.0001	0.0001	0.0001	0.0001	0.0001	0.3025	0.0001	0.0001	0.6173	0.0001
Cre01.g041256.v5.5:s:5776161-5776283	N4	chromosome_1:5776283-5776683	0.0001	0.0001	0.0001	0.7858	0.0001	0.0001	0.0001	0.5101	0.0001	0.0001	0.0001	0.5676	0.0001	0.0001	0.0001	0.1844	0.0001	0.0001	0.164	0.0001	0.0001	0.3661	0.3432	0.2976	0.0001	0.3499	0.0001
Cre01.g041256.v5.5:t:5777089-5777178	N7	chromosome_1:5776909-5777089	0.0001	0.0001	0.0001	0.6406	0.0001	0.0001	0.0001	0.3883	0.0001	0.0001	0.0001	0.0001	0.0001	0.0001	0.0001	0.1082	0.0001	0.0001	0.0696	0.0001	0.0001	0.1932	0.212	0.2438	0.0001	0.2127	0.0001
Cre01.g041256.v5.5:t:5777585-5777837	N3	chromosome_1:5777314-5777585	0.1802	0.0001	0.0001	0.0396	0.0229	0.1705	0.1027	0.0848	0.0524	0.0001	0.0656	0.0506	0.0111	0.0522	0.2166	0.0485	0.0001	0.0484	0.0119	0.0001	0.0904	0.0057	0.025	0.0879	0.0705	0.0228	0.1125
Cre01.g041256.v5.5:t:5778618-5778819	N3	chromosome_1:5778271-5778618	0.1246	0.0001	0.0001	0.1576	0.0001	0.0536	0.0519	0.0855	0.1118	0.0497	0.0001	0.0174	0.0604	0.0786	0.0248	0.0194	0.0001	0.0294	0.0424	0.0001	0.0246	0.0504	0.0883	0.0249	0.0142	0.0112	0.02
Cre01.g041256.v5.5:t:5779880-5780083	N7	chromosome_1:5779562-5779888	0.0001	0.0001	0.0001	0.0001	0.0001	0.0001	0.0001	0.0001	0.151	0.0001	0.0001	0.3058	0.0001	0.0001	0.0001	0.0001	0.0001	0.0001	0.0001	0.0001	0.0001	0.0001	0.2016	0.2512	0.0001	0.2679	0.0001
Cre01.g041400.v5.5:s:5794493-5794747	N4	chromosome_1:5792890-5794493	0.5139	0.0001	0.0001	0.6533	0.0001	0.0001	0.0001	0.4289	0.0001	0.0001	0.0001	0.4274	0.0001	0.3166	0.5165	0.4126	0.0001	0.3281	0.3799	0.4247	0.3047	0.203	0.3478	0.3072	0.4752	0.3276	0.2855
Cre01.g041500.v5.5:t:5811418-5811537	N4	chromosome_1:5811278-5811418	0.0001	0.0001	0.0001	0.0001	0.0001	0.0001	0.0001	0.0001	0.0942	0.259	0.0001	0.3104	0.1202	0.2917	0.3568	0.2818	0.0001	0.3389	0.2412	0.2706	0.2782	0.2933	0.3427	0.4336	0.4812	0.3217	0.5358
Cre01.g041800.v5.5:s:5851087-5851155	N3	chromosome_1:5851155-5851509	0.0001	0.0001	0.0001	0.0001	0.0001	0.0001	0.0001	0.0001	0.0001	0.0001	0.0001	0.0001	0.0001	0.0001	0.0001	0.1105	0.0001	0.0419	0.142	0.0833	0.022	0.0001	0.0208	0.0198	0.02	0.0186	0.0001
Cre01.g041800.v5.5:t:5851480-5851583	N3	chromosome_1:5851155-5851509	0.0001	0.0001	0.0001	0.0001	0.0001	0.0001	0.0001	0.0001	0.0001	0.0001	0.0001	0.0001	0.0001	0.0001	0.0001	0.0877	0.0001	0.0346	0.1612	0.0442	0.0105	0.0147	0.0085	0.0146	0.014	0.0099	0.0152
Cre01.g043500.v5.5:s:6096653-6096719	N3	chromosome_1:6096138-6096653	0.0088	0.0001	0.0716	0.0204	0.0001	0.0281	0.0001	0.0313	0.0001	0.0276	0.0157	0.0261	0.0182	0.0198	0.1205	0.0229	0.02	0.0671	0.0426	0.0997	0.0356	0.0141	0.0572	0.0358	0.0769	0.0484	0.0159
Cre01.g043500.v5.5:t:6095698-6096138	N3	chromosome_1:6096138-6096653	0.0058	0.042	0.046	0.0169	0.0001	0.0229	0.0207	0.0001	0.0663	0.0166	0.0116	0.021	0.0153	0.0208	0.0835	0.0155	0.0125	0.0354	0.0253	0.0549	0.0349	0.0091	0.037	0.0226	0.067	0.0351	0.0105
Cre01.g043550.v5.5:s:6106979-6107058	N3	chromosome_1:6105959-6106979	0.0906	0.0001	0.0604	0.0679	0.0001	0.0001	0.0001	0.0001	0.0001	0.0001	0.0001	0.0587	0.0144	0.0001	0.1357	0.0803	0.0001	0.0111	0.0152	0.0552	0.0123	0.0799	0.0253	0.0082	0.0253	0.0479	0.0206
Cre01.g043550.v5.5:t:6105107-6105959	N3	chromosome_1:6105959-6106979	0.0885	0.0001	0.0609	0.0673	0.0001	0.0001	0.0001	0.0001	0.0001	0.0001	0.0001	0.0584	0.0145	0.0001	0.1318	0.0812	0.0001	0.0111	0.015	0.0533	0.0125	0.0807	0.0255	0.0083	0.0252	0.0477	0.0205
Cre01.g043950.v5.5:s:6155363-6155645	N7	chromosome_1:6155193-6155363	0.0001	0.0001	0.0001	0.0908	0.0001	0.0001	0.0001	0.0001	0.0001	0.0001	0.0001	0.0868	0.0001	0.0001	0.0001	0.1714	0.1967	0.1969	0.1792	0.2321	0.2083	0.2488	0.1457	0.2315	0.2467	0.2036	0.0502
Cre01.g046150.v5.5:t:6481716-6481879	N2	chromosome_1:6481481-6481716	0.074	0.1255	0.0238	0.1135	0.1412	0.1847	0.153	0.1511	0.1425	0.0416	0.1443	0.2619	0.1076	0.127	0.183	0.2111	0.0707	0.1161	0.1042	0.0899	0.1245	0.1536	0.1171	0.1022	0.1083	0.0877	0.1248
Cre01.g047218.v5.5:t:6592727-6593380	N7	chromosome_1:6592478-6592727	0.1786	0.0001	0.0001	0.0379	0.0001	0.0001	0.0001	0.0001	0.042	0.0239	0.0239	0.0131	0.0943	0.0001	0.0001	0.0872	0.0001	0.0583	0.1907	0.0216	0.0573	0.2155	0.2161	0.2033	0.0001	0.2152	0.017
Cre01.g047265.v5.5:t:6600320-6600864	N3	chromosome_1:6600184-6600320	0.0125	0.0229	0.0001	0.0084	0.0001	0.0394	0.0101	0.0056	0.0065	0.0053	0.0434	0.1203	0.0058	0.0165	0.0001	0.014	0.0001	0.0001	0.0001	0.0001	0.0001	0.0157	0.0116	0.0001	0.0157	0.0066	0.0001
Cre01.g047400.v5.5:t:6629482-6629602	N3	chromosome_1:6629208-6629482	0.0001	0.0001	0.0001	0.0001	0.0001	0.0001	0.0001	0.0001	0.0001	0.0001	0.0001	0.026	0.0001	0.0001	0.0001	0.0001	0.0001	0.3593	0.0001	0.0001	0.0001	0.0824	0.0688	0.0001	0.0001	0.0985	0.0001
Cre01.g047600.v5.5:t:6646150-6646531	N3	chromosome_1:6646531-6647034	0.0001	0.0001	0.0001	0.0001	0.0001	0.0001	0.0001	0.0001	0.1906	0.0001	0.2121	0.0705	0.0001	0.0499	0.1409	0.1176	0.0001	0.1456	0.1609	0.0001	0.0001	0.0001	0.1274	0.0001	0.0661	0.0104	0.0001
Cre01.g047850.v5.5:s:6666191-6666344	N3	chromosome_1:6664626-6666191	0.0282	0.0001	0.0581	0.024	0.0195	0.0686	0.0139	0.0671	0.0101	0.042	0.0202	0.0164	0.0225	0.0891	0.0054	0.0194	0.0115	0.0419	0.1199	0.0302	0.0374	0.0123	0.0735	0.0452	0.0753	0.1201	0.1462
Cre01.g048150.v5.5:s:6706198-6706385	N6	chromosome_1:6706068-6706198	0.3367	0.3124	0.2828	0.3145	0.2275	0.2741	0.2841	0.3124	0.2443	0.2587	0.2502	0.2632	0.2421	0.3023	0.2707	0.3583	0.2338	0.3255	0.2859	0.2227	0.2687	0.2291	0.3231	0.2325	0.3041	0.2804	0.2357
Cre01.g048501.v5.5:s:6748364-6748450	N3	chromosome_1:6748086-6748377	0.0001	0.0001	0.0001	0.143	0.0001	0.0001	0.0001	0.0001	0.0001	0.0084	0.057	0.1105	0.0602	0.0001	0.0001	0.0001	0.0001	0.0001	0.0125	0.0001	0.0001	0.0001	0.0001	0.0001	0.0001	0.0001	0.0001
Cre01.g048600.v5.5:s:6759127-6760284	N3	chromosome_1:6758938-6759127	0.0001	0.0001	0.0222	0.0102	0.0001	0.0346	0.0124	0.0083	0.0096	0.0302	0.0074	0.0083	0.0302	0.0089	0.01	0.0063	0.0659	0.0101	0.0801	0.0161	0.0132	0.0119	0.1155	0.0078	0.0095	0.0405	0.056
Cre01.g049050.v5.5:s:6802173-6802356	N3	chromosome_1:6802093-6802173	0.0291	0.0059	0.0177	0.025	0.0103	0.0403	0.0288	0.0152	0.0162	0.0254	0.0155	0.0152	0.0239	0.0217	0.0754	0.0209	0.0035	0.0147	0.0099	0.0173	0.0294	0.0229	0.0215	0.0184	0.0028	0.0109	0.0128
Cre01.g049100.v5.5:t:6809502-6809602	N4	chromosome_1:6809280-6809507	0.1201	0.0001	0.1065	0.1502	0.0001	0.0001	0.0001	0.0001	0.1178	0.0001	0.0001	0.1075	0.1208	0.1977	0.2041	0.142	0.0001	0.2541	0.2897	0.1062	0.1252	0.3491	0.1851	0.1672	0.2923	0.2331	0.2382
Cre01.g049350.v5.5:s:6846464-6846556	N2	chromosome_1:6846307-6846464	0.1014	0.1483	0.1158	0.1748	0.1303	0.088	0.1206	0.0244	0.0524	0.062	0.0823	0.0507	0.098	0.0391	0.0927	0.0682	0.1096	0.0637	0.0951	0.0498	0.0746	0.0163	0.0576	0.0472	0.0442	0.0498	0.0469
Cre01.g049350.v5.5:s:6847824-6847994	N3	chromosome_1:6847733-6847985	0.0404	0.1014	0.0743	0.06	0.0753	0.0473	0.0435	0.0135	0.0756	0.0422	0.04	0.0092	0.0185	0.0001	0.1088	0.0444	0.0001	0.0249	0.0685	0.0001	0.0001	0.0647	0.0127	0.0237	0.0227	0.0151	0.0001
Cre01.g050000.v5.5:s:6941497-6941573	N7	chromosome_1:6940525-6941497	0.0597	0.0179	0.113	0.0994	0.0053	0.072	0.0472	0.0388	0.0536	0.0439	0.0645	0.0528	0.103	0.0703	0.1196	0.0805	0.1427	0.1779	0.1324	0.0957	0.13	0.2694	0.1189	0.1793	0.0294	0.0849	0.1793
Cre01.g050000.v5.5:t:6939827-6940005	N7	chromosome_1:6940005-6940368	0.1546	0.0897	0.1298	0.0564	0.0479	0.0623	0.0682	0.0834	0.0348	0.0659	0.0582	0.0933	0.0591	0.0856	0.0692	0.0844	0.232	0.1302	0.126	0.1381	0.0455	0.1422	0.1164	0.2034	0.0962	0.1641	0.2151
Cre01.g050300.v5.5:t:6968822-6969028	N3	chromosome_1:6968602-6968853	0.0001	0.0001	0.0001	0.0001	0.0001	0.0001	0.0001	0.0001	0.2101	0.1516	0.0101	0.1335	0.0001	0.2085	0.2211	0.046	0.0001	0.0918	0.0793	0.21	0.0001	0.0001	0.0625	0.01	0.0001	0.0712	0.0001
Cre01.g050300.v5.5:t:6969232-6969259	N7	chromosome_1:6969158-6969239	0.0001	0.0001	0.0001	0.0001	0.0001	0.0001	0.0001	0.1042	0.0001	0.1817	0.0909	0.1402	0.1682	0.1383	0.2225	0.2675	0.0001	0.3376	0.0001	0.0001	0.0001	0.0001	0.3008	0.0001	0.1105	0.4921	0.0001
Cre01.g050700.v5.5:t:7030129-7031017	N2	chromosome_1:7029945-7030132	0.0001	0.0001	0.0001	0.0001	0.0001	0.0001	0.0001	0.0001	0.0001	0.1305	0.2265	0.2371	0.2791	0.3177	0.2871	0.3795	0.3483	0.2411	0.3364	0.3483	0.3459	0.0001	0.0001	0.0001	0.0001	0.0001	0.0001
Cre01.g050850.v5.5:s:7048432-7048968	N3	chromosome_1:7048968-7049166	0.1367	0.0445	0.0771	0.0673	0.0509	0.0481	0.0912	0.0409	0.0452	0.0868	0.0289	0.05	0.0647	0.0493	0.0077	0.0129	0.0043	0.0084	0.0388	0.0127	0.0344	0.0193	0.0168	0.044	0.0487	0.0322	0.0475
Cre01.g050900.v5.5:s:7053624-7053737	N2	chromosome_1:7053737-7054206	0.1042	0.0001	0.0129	0.0325	0.0168	0.0819	0.0326	0.0736	0.1167	0.2225	0.0776	0.0504	0.1561	0.0489	0.0687	0.1097	0.0179	0.0922	0.0795	0.0166	0.0071	0.0133	0.0345	0.0475	0.0064	0.1225	0.0094
Cre01.g050900.v5.5:t:7054166-7054298	N3	chromosome_1:7053737-7054206	0.0001	0.0001	0.0196	0.0336	0.0134	0.1329	0.0297	0.087	0.1049	0.0001	0.0725	0.0481	0.1543	0.0813	0.0671	0.0985	0.0185	0.1469	0.0763	0.0145	0.0101	0.0101	0.0455	0.0492	0.0112	0.1239	0.0086
Cre01.g051000.v5.5:t:7064010-7064139	N3	chromosome_1:7063820-7064010	0.0632	0.0235	0.0053	0.0034	0.0171	0.0097	0.0152	0.0162	0.0262	0.0179	0.0108	0.0048	0.0064	0.0219	0.0049	0.003	0.0256	0.0039	0.0137	0.0062	0.0163	0.0068	0.03	0.0235	0.0157	0.0454	0.0183
Cre01.g051300.v5.5:t:7097306-7097476	N3	chromosome_1:7097087-7097409	0.1346	0.0169	0.0544	0.0968	0.0147	0.0555	0.0065	0.0846	0.0836	0.0865	0.0267	0.0333	0.0527	0.0058	0.032	0.0025	0.0066	0.0525	0.0234	0.0242	0.0188	0.0039	0.057	0.0234	0.0719	0.0174	0.024
Cre01.g051450.v5.5:s:7114874-7115155	N4	chromosome_1:7114660-7114908	0.0802	0.0417	0.0819	0.286	0.0001	0.0001	0.1815	0.076	0.1539	0.082	0.1533	0.1047	0.1048	0.1813	0.1283	0.206	0.1047	0.2799	0.2231	0.1879	0.1597	0.1404	0.1375	0.2265	0.1672	0.2698	0.1498
Cre01.g051700.v5.5:s:7193396-7194649	N5	chromosome_1:7194649-7194810	0.1181	0.0001	0.0001	0.1852	0.0001	0.0175	0.0001	0.0184	0.0001	0.0833	0.0001	0.0001	0.166	0.1075	0.0001	0.4775	0.0001	0.5218	0.0001	0.6296	0.723	0.7933	0.6625	0.773	0.7683	0.645	0.3905
Cre01.g051700.v5.5:t:7195313-7195862	N7	chromosome_1:7195094-7195313	0.0786	0.0001	0.0001	0.1471	0.0001	0.1186	0.0001	0.0277	0.0001	0.0333	0.0001	0.0001	0.0838	0.1138	0.0001	0.0601	0.0001	0.1952	0.0001	0.0001	0.0001	0.0001	0.3274	0.0001	0.0001	0.3634	0.32
Cre01.g051750.v5.5:s:7198411-7198775	N3	chromosome_1:7198775-7199389	0.0001	0.0001	0.0001	0.0001	0.0001	0.0001	0.0001	0.0001	0.0001	0.0001	0.0001	0.0001	0.0001	0.0153	0.0099	0.006	0.0556	0.0639	0.0059	0.0385	0.0802	0.0799	0.0723	0.0672	0.1012	0.0722	0.0729
Cre01.g051750.v5.5:t:7199389-7199457	N3	chromosome_1:7198775-7199389	0.0292	0.0001	0.0001	0.0417	0.0001	0.0001	0.0001	0.0001	0.0001	0.0001	0.0001	0.0001	0.0001	0.0225	0.0122	0.0063	0.0654	0.045	0.0105	0.0454	0.0504	0.0878	0.0672	0.0545	0.0664	0.0539	0.0513
Cre01.g051750.v5.5:t:7200202-7200272	N3	chromosome_1:7200075-7200202	0.0659	0.0001	0.0001	0.1686	0.0001	0.0001	0.0001	0.0001	0.0001	0.0001	0.0001	0.0111	0.0001	0.0046	0.0169	0.0117	0.0312	0.0023	0.0143	0.0326	0.06	0.0141	0.029	0.002	0.0231	0.0416	0.0805
Cre01.g051875.v5.5:t:7218230-7218318	N7	chromosome_1:7218169-7218230	0.0001	0.0001	0.0001	0.0001	0.0001	0.0001	0.0001	0.0001	0.0001	0.0001	0.0001	0.0001	0.0001	0.0001	0.2429	0.2202	0.0001	0.1359	0.0001	0.2086	0.0001	0.0001	0.2404	0.0001	0.0222	0.1669	0.0001
Cre01.g052300.v5.5:t:7251077-7251130	N3	chromosome_1:7250837-7251083	0.0631	0.0001	0.0263	0.0537	0.0335	0.0203	0.0166	0.0231	0.0111	0.0305	0.018	0.02	0.0414	0.0142	0.0331	0.098	0.0263	0.0114	0.0576	0.0191	0.1068	0.0208	0.0866	0.1458	0.0199	0.01	0.0001
Cre01.g052450.v5.5:s:7262834-7264665	N3	chromosome_1:7262547-7262834	0.0591	0.0845	0.0395	0.056	0.0233	0.0474	0.0595	0.0615	0.0536	0.0135	0.0343	0.0255	0.0491	0.0224	0.018	0.0268	0.0669	0.0181	0.0663	0.0787	0.0279	0.0344	0.0524	0.0323	0.0513	0.0319	0.1588
Cre01.g052650.v5.5:s:7302317-7302478	N3	chromosome_1:7300866-7302317	0.0001	0.0001	0.0001	0.0001	0.0001	0.0001	0.0001	0.0001	0.0001	0.0001	0.0334	0.0001	0.0001	0.0001	0.0001	0.0001	0.0001	0.0001	0.0001	0.0001	0.0001	0.0001	0.2861	0.0001	0.0001	0.0001	0.0001
Cre01.g052800.v5.5:t:7349615-7349660	N3	chromosome_1:7349660-7350788	0.1221	0.0001	0.0001	0.1481	0.0001	0.0001	0.0001	0.0001	0.0001	0.0001	0.0001	0.0001	0.0001	0.0001	0.0001	0.0001	0.0001	0.0001	0.0001	0.0001	0.1637	0.0692	0.0745	0.1286	0.101	0.0578	0.1089
Cre01.g052950.v5.5:s:7369278-7369777	N2	chromosome_1:7369777-7369976	0.0001	0.0001	0.0001	0.0753	0.0001	0.0001	0.0001	0.0001	0.1548	0.2083	0.0559	0.0627	0.0844	0.1374	0.0929	0.3068	0.0001	0.1207	0.168	0.0001	0.0001	0.0001	0.0001	0.1267	0.0001	0.0945	0.0531
Cre01.g053100.v5.5:s:7382569-7382711	N3	chromosome_1:7382711-7383970	0.0001	0.0001	0.0001	0.0001	0.0001	0.0001	0.0001	0.0001	0.0001	0.0001	0.0001	0.0001	0.0001	0.0001	0.0001	0.0001	0.0001	0.0001	0.0001	0.0001	0.0001	0.0001	0.4751	0.0001	0.0001	0.0001	0.0001
Cre01.g053288.v5.5:s:7422165-7422441	N3	chromosome_1:7421845-7422165	0.054	0.0001	0.0001	0.0239	0.0001	0.0898	0.0001	0.0461	0.0153	0.0001	0.0928	0.1304	0.012	0.0001	0.0001	0.0125	0.0001	0.1188	0.0737	0.0182	0.0001	0.0836	0.1063	0.061	0.0741	0.1038	0.0001
Cre01.g053288.v5.5:t:7422165-7422441	N3	chromosome_1:7422377-7423093	0.0048	0.0001	0.0001	0.018	0.0001	0.0118	0.0001	0.0093	0.0119	0.0158	0.0084	0.0083	0.0119	0.0157	0.0001	0.0448	0.0001	0.0471	0.0626	0.0119	0.0108	0.0941	0.2237	0.0001	0.0096	0.0724	0.0001
Cre01.g053300.v5.5:t:7426086-7426448	N2	chromosome_1:7425807-7426086	0.108	0.0001	0.0001	0.0001	0.0001	0.0001	0.0001	0.2672	0.1532	0.1592	0.2934	0.2418	0.311	0.0001	0.2714	0.3342	0.0001	0.3972	0.0001	0.0001	0.0001	0.0001	0.4647	0.2502	0.093	0.153	0.0001
Cre01.g053900.v5.5:t:7492875-7493064	N7	chromosome_1:7492684-7492875	0.0001	0.0001	0.0001	0.1201	0.0001	0.0702	0.017	0.1113	0.1027	0.0187	0.0118	0.1295	0.0152	0.0443	0.0647	0.0453	0.1013	0.0632	0.0447	0.0449	0.1105	0.121	0.1389	0.1514	0.0937	0.0678	0.1359
Cre01.g054100.v5.5:s:7513334-7513754	N7	chromosome_1:7513091-7513415	0.2871	0.0001	0.0111	0.0363	0.0001	0.0099	0.011	0.0058	0.1414	0.057	0.1103	0.0678	0.0644	0.0806	0.1094	0.0737	0.0633	0.1379	0.0918	0.175	0.0697	0.2632	0.1744	0.1914	0.1852	0.1905	0.0001
Cre01.g054100.v5.5:s:7516870-7516932	N3	chromosome_1:7516732-7516870	0.0601	0.0001	0.025	0.0512	0.0184	0.061	0.0146	0.0092	0.0092	0.0111	0.0081	0.0148	0.1029	0.0067	0.0373	0.0176	0.0179	0.0126	0.0343	0.0091	0.0119	0.0087	0.0131	0.0242	0.0063	0.0236	0.0286
Cre01.g055050.v5.5:s:7622145-7622182	N3	chromosome_1:7621789-7622145	0.0001	0.0001	0.0125	0.0298	0.0727	0.0093	0.0434	0.0338	0.0848	0.0321	0.0371	0.0024	0.0221	0.031	0.0287	0.0711	0.0074	0.0269	0.0757	0.0874	0.0087	0.0095	0.0582	0.0001	0.0116	0.0134	0.0001
Cre01.g055250.v5.5:s:7635698-7636311	N3	chromosome_1:7635389-7636157	0.0001	0.0001	0.0001	0.0001	0.0001	0.0001	0.1255	0.0428	0.0441	0.1047	0.0491	0.079	0.0843	0.0001	0.0783	0.0648	0.0278	0.0435	0.1348	0.1674	0.0333	0.0001	0.0122	0.0001	0.0576	0.0001	0.0001
Cre01.g055424.v5.5:t:7677406-7677455	N3	chromosome_1:7677055-7677406	0.0001	0.0001	0.0001	0.0001	0.0001	0.0001	0.0001	0.0146	0.0098	0.0546	0.0132	0.0001	0.0001	0.0001	0.0124	0.0502	0.0001	0.0001	0.0001	0.0001	0.0001	0.0001	0.1868	0.0001	0.0001	0.0001	0.0001
Cre01.g055432.v5.5:s:7689088-7689553	N6	chromosome_1:7689553-7689873	0.5746	0.0001	0.0001	0.2642	0.0001	0.0001	0.0001	0.0001	0.3404	0.3854	0.3807	0.4466	0.3984	0.3117	0.4272	0.3545	0.4105	0.4826	0.4048	0.2317	0.2674	0.3837	0.3044	0.3162	0.2543	0.3445	0.2468
Cre01.g055432.v5.5:t:7691587-7693253	N3	chromosome_1:7691376-7691587	0.0001	0.0001	0.0001	0.0095	0.0001	0.0001	0.0001	0.0001	0.1257	0.1801	0.0074	0.035	0.0683	0.0349	0.0711	0.0613	0.0547	0.0752	0.0809	0.0391	0.0043	0.0749	0.02	0.1107	0.1212	0.0526	0.1191
Cre01.g059252.v5.5:t:7853287-7853464	N3	chromosome_1:7853208-7853287	0.0001	0.0001	0.0001	0.0307	0.0001	0.0155	0.0166	0.081	0.0249	0.0304	0.024	0.0106	0.0001	0.0562	0.0239	0.0157	0.0001	0.0337	0.0106	0.0193	0.0419	0.0097	0.0056	0.0091	0.0229	0.0115	0.0721
Cre01.g059617.v5.5:s:7858014-7858041	N7	chromosome_1:7858041-7858186	0.0001	0.0001	0.0001	0.0149	0.0001	0.0001	0.0001	0.1678	0.0001	0.0303	0.0001	0.0235	0.0001	0.0001	0.0001	0.189	0.0001	0.0204	0.172	0.0001	0.145	0.2184	0.2517	0.3848	0.1484	0.1111	0.148
Cre01.g059617.v5.5:t:7858939-7859046	N7	chromosome_1:7858728-7858939	0.0001	0.0001	0.0001	0.0234	0.0001	0.0001	0.0001	0.0659	0.0001	0.0455	0.0001	0.098	0.0001	0.0001	0.0001	0.0995	0.0001	0.1404	0.041	0.0001	0.1723	0.1	0.0493	0.3277	0.2003	0.0531	0.1709
Cre01.g062902.v5.5:s:7889659-7889746	N3	chromosome_1:7889210-7889659	0.0534	0.0574	0.0167	0.0865	0.0152	0.1101	0.0667	0.0673	0.0823	0.0225	0.035	0.0405	0.1828	0.0495	0.0594	0.0351	0.0117	0.0061	0.0076	0.0113	0.0104	0.0108	0.0496	0.012	0.101	0.0067	0.0121
Cre01.g063997.v5.5:t:7903146-7903344	N2	chromosome_1:7902858-7903146	0.0941	0.1	0.2022	0.2069	0.1034	0.1609	0.1738	0.2063	0.166	0.1066	0.0868	0.1844	0.1332	0.1284	0.1474	0.154	0.2946	0.1794	0.0952	0.122	0.0833	0.0995	0.0568	0.0427	0.0642	0.0459	0.0582
Cre01.g068012.v5.5:t:7967469-7967537	N3	chromosome_1:7967230-7967490	0.0001	0.0001	0.0263	0.0292	0.0687	0.0155	0.0262	0.0449	0.0293	0.0194	0.0182	0.0129	0.055	0.0397	0.0888	0.0327	0.0741	0.0136	0.0066	0.0329	0.0349	0.0322	0.0421	0.0178	0.0309	0.005	0.0616
Cre01.g068377.v5.5:t:7971097-7971219	N3	chromosome_1:7970973-7971097	0.1053	0.203	0.0705	0.0267	0.0259	0.0524	0.0313	0.0183	0.0575	0.0171	0.0359	0.058	0.0409	0.0219	0.0111	0.0055	0.0671	0.0245	0.0116	0.0315	0.009	0.0302	0.0191	0.0076	0.1007	0.0799	0.0296
Cre01.g068742.v5.5:t:7977472-7977559	N3	chromosome_1:7977299-7977478	0.0095	0.0278	0.0123	0.004	0.0151	0.0056	0.0044	0.0037	0.0053	0.0061	0.0049	0.0562	0.0265	0.0081	0.0074	0.0044	0.0143	0.007	0.0081	0.0105	0.0077	0.0095	0.0054	0.0067	0.0117	0.0047	0.022
Cre02.g073400.v5.5:t:51500-52997	N3	chromosome_2:51327-51500	0.0085	0.0001	0.0149	0.0936	0.0836	0.0312	0.0072	0.0047	0.0069	0.0063	0.0242	0.0585	0.0283	0.0073	0.0065	0.0036	0.0114	0.0038	0.0302	0.0053	0.0313	0.0061	0.0149	0.0039	0.0822	0.016	0.0259
Cre02.g073500.v5.5:s:62122-62223	N3	chromosome_2:61977-62134	0.0001	0.0001	0.0001	0.0001	0.0001	0.0001	0.0001	0.0001	0.0001	0.0001	0.0001	0.0001	0.0001	0.0455	0.0612	0.0075	0.0145	0.0282	0.0372	0.041	0.044	0.0193	0.0168	0.0225	0.0236	0.0185	0.0239
Cre02.g073900.v5.5:t:94008-94185	N2	chromosome_2:93808-94008	0.1538	0.0878	0.0927	0.1103	0.0714	0.1072	0.0592	0.094	0.1249	0.1381	0.0001	0.2135	0.0409	0.0156	0.0877	0.1779	0.1115	0.0732	0.0613	0.0681	0.0777	0.1069	0.0193	0.0881	0.0899	0.0519	0.1094
Cre02.g074000.v5.5:s:101755-103020	N3	chromosome_2:101611-101755	0.0001	0.0001	0.0001	0.0001	0.0001	0.0001	0.0001	0.0001	0.0001	0.0001	0.0001	0.0332	0.0001	0.0001	0.2143	0.0001	0.0001	0.1544	0.0001	0.0001	0.0001	0.0001	0.0001	0.0001	0.0001	0.0001	0.0001
Cre02.g074050.v5.5:t:113335-113470	N3	chromosome_2:113116-113348	0.0001	0.0001	0.0001	0.0001	0.0001	0.0001	0.0001	0.0001	0.1467	0.0001	0.0001	0.0138	0.0001	0.1961	0.0001	0.0001	0.0001	0.111	0.0001	0.0001	0.0001	0.0001	0.0001	0.0001	0.0001	0.0001	0.0001
Cre02.g074100.v5.5:t:115140-115171	N3	chromosome_2:115166-115412	0.0225	0.0187	0.0182	0.0116	0.0076	0.0074	0.0266	0.007	0.0212	0.0299	0.0278	0.0926	0.0029	0.0608	0.0072	0.0134	0.0395	0.0028	0.0471	0.0063	0.0058	0.0236	0.0133	0.0066	0.0501	0.0036	0.0395
Cre02.g074437.v5.5:s:180698-181251	N3	chromosome_2:179351-180698	0.0419	0.0001	0.012	0.0513	0.0001	0.046	0.0702	0.0606	0.0175	0.0278	0.0159	0.011	0.1167	0.0635	0.0128	0.144	0.0554	0.0438	0.0907	0.0383	0.0954	0.0353	0.0416	0.0347	0.0047	0.0737	0.0389
Cre02.g074650.v5.5:t:213942-214020	N3	chromosome_2:214020-214180	0.0962	0.0146	0.0177	0.0051	0.0078	0.0189	0.0051	0.0133	0.0262	0.015	0.0087	0.015	0.0256	0.0055	0.0055	0.0033	0.0111	0.0056	0.0069	0.0177	0.0001	0.0195	0.0115	0.0001	0.0001	0.0001	0.021
Cre02.g074800.v5.5:t:236236-236361	N3	chromosome_2:236153-236269	0.0736	0.0216	0.0001	0.1376	0.1014	0.098	0.0862	0.0745	0.0624	0.0127	0.0539	0.0568	0.1101	0.0497	0.0329	0.0613	0.0001	0.043	0.0124	0.0303	0.0001	0.1355	0.0281	0.0115	0.0075	0.0121	0.0053
Cre02.g075000.v5.5:t:278712-279080	N7	chromosome_2:278521-278712	0.0001	0.0001	0.0001	0.0001	0.0001	0.0001	0.0001	0.0611	0.0839	0.0168	0.1148	0.1071	0.0798	0.103	0.0359	0.0486	0.0783	0.0627	0.0941	0.0851	0.0663	0.12	0.1033	0.1132	0.0376	0.0826	0.1423
Cre02.g075350.v5.5:s:312610-312909	N2	chromosome_2:312377-312610	0.0001	0.0001	0.0001	0.0001	0.0001	0.0001	0.0001	0.0001	0.0001	0.4305	0.3164	0.3925	0.4561	0.4024	0.3858	0.398	0.4277	0.299	0.3832	0.5468	0.5357	0.0001	0.0001	0.0001	0.0001	0.0001	0.0001
Cre02.g075800.v5.5:s:372025-372079	N7	chromosome_2:372079-372231	0.0948	0.0001	0.0896	0.0822	0.0741	0.0711	0.0894	0.0496	0.107	0.0538	0.0853	0.0923	0.0509	0.1161	0.0527	0.1044	0.0551	0.106	0.1752	0.0969	0.0923	0.0863	0.1043	0.1507	0.0959	0.1011	0.1757
Cre02.g075800.v5.5:t:372231-372293	N7	chromosome_2:372079-372231	0.0977	0.0001	0.0901	0.0837	0.0735	0.0726	0.0909	0.0492	0.108	0.0538	0.0875	0.094	0.0511	0.1187	0.0522	0.1067	0.0549	0.1037	0.1693	0.0961	0.0928	0.0825	0.1081	0.1543	0.0987	0.0984	0.1747
Cre02.g075800.v5.5:t:372577-372618	N3	chromosome_2:372293-372583	0.0249	0.0001	0.0099	0.0062	0.0152	0.0398	0.0109	0.0791	0.0516	0.0607	0.0094	0.0081	0.0092	0.0289	0.0196	0.0112	0.008	0.0176	0.0412	0.0268	0.0561	0.0274	0.028	0.0361	0.0338	0.0273	0.0272
Cre02.g076100.v5.5:s:423245-423509	N3	chromosome_2:423031-423245	0.0001	0.0001	0.0001	0.0227	0.0001	0.0895	0.0263	0.0628	0.0201	0.1468	0.1511	0.015	0.1133	0.0291	0.0294	0.0791	0.0001	0.0759	0.0001	0.0001	0.0001	0.0001	0.0001	0.0001	0.0001	0.0001	0.0001
Cre02.g076200.v5.5:s:438248-438820	N3	chromosome_2:438043-438248	0.1064	0.0001	0.0923	0.0189	0.0645	0.0275	0.0639	0.0235	0.0196	0.0329	0.046	0.0704	0.0311	0.0263	0.075	0.0001	0.0001	0.0001	0.0315	0.0001	0.0001	0.0001	0.0746	0.0001	0.0001	0.0001	0.0001
Cre02.g076750.v5.5:s:486183-486419	N3	chromosome_2:486085-486183	0.0524	0.0604	0.095	0.0398	0.0463	0.0073	0.0425	0.0332	0.0183	0.0514	0.0586	0.0156	0.0644	0.0067	0.0364	0.0129	0.0346	0.0043	0.0592	0.0592	0.0058	0.0253	0.0609	0.036	0.0263	0.0048	0.0072
Cre02.g076850.v5.5:s:493027-493092	N3	chromosome_2:492848-493027	0.0729	0.0001	0.0001	0.0566	0.0001	0.1736	0.0067	0.0734	0.0647	0.0056	0.0047	0.0815	0.0321	0.0485	0.022	0.0021	0.005	0.078	0.0245	0.1367	0.1406	0.0315	0.0594	0.028	0.0652	0.0635	0.0611
Cre02.g076850.v5.5:t:492325-492384	N3	chromosome_2:492384-492559	0.0703	0.0001	0.0001	0.111	0.0001	0.0496	0.0561	0.0076	0.0158	0.0117	0.0558	0.0598	0.0799	0.0088	0.0588	0.0542	0.0671	0.0186	0.0051	0.007	0.0057	0.0076	0.0038	0.0077	0.0059	0.0048	0.0096
Cre02.g077550.v5.5:t:558798-559019	N1	chromosome_2:558769-558913	0.1035	0.0001	0.0001	0.6609	0.0001	0.8633	0.9471	0.9513	0.8035	0.6621	0.5488	0.4044	0.3583	0.35	0.1733	0.1787	0.1803	0.1603	0.1895	0.1915	0.2067	0.2032	0.2469	0.2315	0.2397	0.3754	0.4643
Cre02.g077600.v5.5:s:565554-565702	N3	chromosome_2:565133-565554	0.0001	0.0001	0.0001	0.0185	0.0001	0.0203	0.0293	0.0001	0.0294	0.0001	0.0279	0.0218	0.0263	0.0262	0.0208	0.0101	0.0088	0.0043	0.0064	0.0079	0.0055	0.0186	0.0665	0.0155	0.0142	0.0035	0.0164
Cre02.g077700.v5.5:t:585968-588022	N3	chromosome_2:585729-585974	0.0001	0.0001	0.0001	0.0129	0.0001	0.0181	0.014	0.0226	0.1541	0.016	0.0144	0.0088	0.0158	0.0381	0.0158	0.0517	0.0202	0.0091	0.0173	0.0237	0.0162	0.022	0.0127	0.0728	0.0298	0.0067	0.0644
Cre02.g077900.v5.5:s:615060-615361	N3	chromosome_2:615361-615780	0.0977	0.0001	0.0001	0.0087	0.0001	0.0722	0.0001	0.0671	0.0001	0.0001	0.0139	0.0076	0.0001	0.0133	0.0088	0.0068	0.0001	0.0078	0.0207	0.0108	0.0066	0.0255	0.0911	0.0058	0.0258	0.0042	0.0094
Cre02.g078000.v5.5:t:652780-653023	N3	chromosome_2:653023-653117	0.0001	0.0001	0.0001	0.0071	0.0001	0.0391	0.0096	0.0617	0.0052	0.03	0.0416	0.0979	0.0864	0.0087	0.0085	0.0071	0.0695	0.0118	0.0107	0.0001	0.0001	0.0001	0.0001	0.0001	0.0001	0.0001	0.0001
Cre02.g078050.v5.5:t:657395-660898	N7	chromosome_2:657264-657398	0.0001	0.0001	0.0001	0.0001	0.0001	0.0001	0.0001	0.0001	0.0001	0.0001	0.0001	0.1586	0.0001	0.0001	0.0001	0.3237	0.0001	0.0001	0.0001	0.0001	0.0001	0.0001	0.0001	0.0001	0.3283	0.4283	0.1079
Cre02.g078100.v5.5:s:672205-672330	N3	chromosome_2:672073-672205	0.0752	0.0676	0.072	0.0817	0.0469	0.0981	0.0796	0.05	0.0612	0.0483	0.0327	0.0387	0.0502	0.0335	0.0366	0.0294	0.0111	0.0939	0.0437	0.0064	0.0139	0.0358	0.037	0.0418	0.0384	0.0375	0.0144
Cre02.g078100.v5.5:t:671547-671657	N3	chromosome_2:671648-671957	0.0005	0.0027	0.0019	0.0012	0.0662	0.0024	0.0033	0.0032	0.0055	0.0052	0.0028	0.0016	0.0037	0.0063	0.0061	0.0033	0.0111	0.006	0.0061	0.0064	0.0027	0.0031	0.0024	0.0022	0.0024	0.0013	0.0021
Cre02.g078100.v5.5:t:671957-672073	N3	chromosome_2:672073-672205	0.0709	0.0686	0.0713	0.0823	0.0474	0.0995	0.0783	0.0499	0.0601	0.0482	0.0327	0.0415	0.0497	0.0335	0.037	0.0297	0.0112	0.0929	0.0454	0.0064	0.0139	0.0359	0.037	0.0423	0.0379	0.038	0.0144
Cre02.g078750.v5.5:s:767842-768307	N3	chromosome_2:768307-768488	0.0039	0.0118	0.0134	0.0292	0.1955	0.0633	0.0001	0.0884	0.0199	0.0001	0.0187	0.0558	0.0197	0.0001	0.0516	0.0223	0.0159	0.0331	0.0849	0.0307	0.0266	0.0093	0.0208	0.0598	0.0946	0.0656	0.0593
Cre02.g078750.v5.5:t:768900-769005	N3	chromosome_2:768603-768947	0.0607	0.0177	0.0001	0.0093	0.0001	0.0001	0.0001	0.0001	0.0001	0.0001	0.0001	0.0001	0.0001	0.0001	0.0001	0.032	0.0001	0.0112	0.0704	0.0115	0.1044	0.0575	0.0702	0.1398	0.0159	0.0293	0.1316
Cre02.g078885.v5.5:s:796558-796605	N7	chromosome_2:796605-797098	0.1643	0.0001	0.106	0.0723	0.0001	0.0208	0.0001	0.0524	0.0001	0.0113	0.0067	0.036	0.0362	0.0649	0.0575	0.0733	0.0001	0.0077	0.0391	0.0899	0.1507	0.0833	0.1418	0.1057	0.0907	0.1437	0.0545
Cre02.g078885.v5.5:t:794480-794733	N7	chromosome_2:794360-794480	0.0982	0.0001	0.0001	0.0224	0.0001	0.0001	0.0001	0.031	0.0001	0.0001	0.0711	0.1609	0.0001	0.0001	0.0001	0.0936	0.0001	0.1761	0.0001	0.0001	0.0001	0.2161	0.0814	0.1229	0.1338	0.1999	0.0001
Cre02.g079000.v5.5:s:824922-825037	N3	chromosome_2:823884-824922	0.0001	0.0001	0.0001	0.0356	0.0001	0.0001	0.0001	0.0001	0.0001	0.0001	0.0001	0.0001	0.0001	0.3117	0.1126	0.1202	0.1342	0.0484	0.0953	0.0075	0.0574	0.0815	0.1027	0.1125	0.0557	0.0195	0.0479
Cre02.g079000.v5.5:t:823697-823884	N3	chromosome_2:823884-824922	0.0001	0.0001	0.0001	0.02	0.0001	0.0001	0.0001	0.0001	0.0001	0.0001	0.0001	0.0001	0.0001	0.2367	0.1124	0.1346	0.1408	0.0372	0.0887	0.005	0.0441	0.0698	0.0938	0.089	0.0495	0.0144	0.0369
Cre02.g079100.v5.5:s:864110-864751	N3	chromosome_2:863938-864126	0.0001	0.0001	0.0001	0.0001	0.0001	0.0001	0.0001	0.0001	0.0001	0.0001	0.0001	0.0001	0.0001	0.0001	0.0001	0.0001	0.0001	0.0001	0.0001	0.0001	0.0001	0.0001	0.2833	0.0001	0.0001	0.0001	0.0001
Cre02.g080100.v5.5:t:971238-971328	N7	chromosome_2:971086-971238	0.015	0.0305	0.0209	0.0087	0.0001	0.0133	0.0001	0.0119	0.0105	0.0601	0.0505	0.0043	0.0112	0.0803	0.1988	0.0724	0.0001	0.0001	0.0709	0.0001	0.0001	0.0869	0.1305	0.0114	0.0958	0.2403	0.0001
Cre02.g080100.v5.5:t:975470-975630	N3	chromosome_2:975010-975470	0.0417	0.0001	0.0001	0.1651	0.0001	0.0294	0.0001	0.0001	0.0001	0.0001	0.0001	0.0861	0.0001	0.0001	0.0001	0.0001	0.0001	0.0732	0.2333	0.0001	0.1389	0.0001	0.1623	0.0001	0.0001	0.0608	0.0001
Cre02.g080750.v5.5:t:1063702-1066049	N3	chromosome_2:1063439-1063744	0.004	0.0146	0.0082	0.0048	0.0001	0.0083	0.0096	0.0523	0.0127	0.0093	0.0067	0.0073	0.0063	0.0329	0.0379	0.0032	0.0077	0.014	0.0158	0.0053	0.0156	0.0368	0.0691	0.0465	0.0215	0.0373	0.0166
Cre02.g081176.v5.5:t:1099039-1099132	N5	chromosome_2:1098813-1099042	0.3397	0.0001	0.4675	0.3973	0.0001	0.0001	0.0001	0.0001	0.0001	0.0001	0.806	0.4482	0.0001	0.0001	0.472	0.4274	0.436	0.4523	0.5147	0.0001	0.5775	0.4709	0.4996	0.4007	0.5218	0.4122	0.5923
Cre02.g081200.v5.5:s:1104179-1104675	N3	chromosome_2:1103936-1104213	0.0075	0.0177	0.0283	0.0185	0.0167	0.0112	0.0726	0.0086	0.0102	0.0354	0.0385	0.0229	0.0068	0.0112	0.0428	0.0189	0.025	0.013	0.0316	0.0152	0.0091	0.0432	0.0201	0.0444	0.0076	0.0071	0.1048
Cre02.g081250.v5.5:s:1108820-1108903	N3	chromosome_2:1108154-1108820	0.0096	0.0128	0.0366	0.027	0.0176	0.0147	0.0175	0.031	0.0197	0.0294	0.0019	0.0261	0.0144	0.0324	0.017	0.0425	0.0111	0.0155	0.0409	0.0378	0.0084	0.0484	0.0462	0.0603	0.014	0.0151	0.07
Cre02.g081250.v5.5:s:1109488-1109625	N3	chromosome_2:1108903-1109488	0.0327	0.019	0.0149	0.0281	0.0445	0.0082	0.0242	0.0298	0.0249	0.0233	0.0244	0.0008	0.0236	0.018	0.0036	0.0023	0.009	0.0888	0.0368	0.0986	0.0053	0.0034	0.0248	0.0506	0.0188	0.0171	0.0373
Cre02.g081250.v5.5:t:1107712-1108154	N3	chromosome_2:1108154-1108820	0.0095	0.0131	0.0366	0.0272	0.0196	0.0161	0.0196	0.0299	0.0211	0.0303	0.0011	0.0327	0.0126	0.0303	0.016	0.0391	0.0068	0.0154	0.0308	0.0411	0.0047	0.0501	0.0439	0.0548	0.0132	0.0176	0.053
Cre02.g081250.v5.5:t:1108444-1108530	N3	chromosome_2:1108530-1109161	0.0331	0.0579	0.0341	0.0413	0.0402	0.0145	0.0268	0.0352	0.0407	0.0208	0.0375	0.0113	0.0203	0.0446	0.0252	0.0097	0.0055	0.0128	0.0043	0.019	0.0042	0.0452	0.0435	0.0471	0.0024	0.0026	0.0041
Cre02.g081450.v5.5:s:1131994-1132176	N3	chromosome_2:1131677-1131994	0.0153	0.0834	0.0479	0.0164	0.0433	0.0365	0.005	0.0165	0.035	0.0211	0.0047	0.0039	0.0457	0.0836	0.0102	0.031	0.0001	0.0769	0.012	0.0119	0.0141	0.0146	0.0285	0.0151	0.0143	0.009	0.0573
Cre02.g081950.v5.5:t:1187159-1187275	N4	chromosome_2:1187275-1187752	0.03	0.0196	0.0082	0.0148	0.0129	0.0078	0.0109	0.0092	0.0465	0.0199	0.0253	0.0828	0.0179	0.0749	0.2638	0.2305	0.0001	0.2098	0.1522	0.277	0.2708	0.3521	0.1427	0.2739	0.1576	0.2741	0.2497
Cre02.g082200.v5.5:s:1215488-1215841	N4	chromosome_2:1215189-1215764	0.0001	0.0001	0.0001	0.4724	0.0001	0.0001	0.0001	0.0001	0.0001	0.0001	0.0001	0.0001	0.0001	0.0001	0.3038	0.3013	0.3466	0.2641	0.2482	0.284	0.2917	0.3195	0.296	0.2726	0.3004	0.3001	0.2325
Cre02.g082200.v5.5:t:1215096-1215189	N4	chromosome_2:1215189-1215764	0.1126	0.0001	0.0001	0.3447	0.0001	0.0001	0.2109	0.0001	0.0001	0.0001	0.0001	0.276	0.0001	0.0001	0.2355	0.2397	0.2579	0.1111	0.1786	0.1732	0.1682	0.282	0.2294	0.2274	0.1985	0.2427	0.1644
Cre02.g082350.v5.5:s:1228845-1229096	N2	chromosome_2:1228731-1228845	0.1231	0.2273	0.3638	0.1849	0.2459	0.1632	0.2104	0.2231	0.1306	0.1281	0.1393	0.1097	0.2622	0.2731	0.1161	0.1451	0.1421	0.0657	0.2044	0.1611	0.068	0.1182	0.1104	0.0548	0.1372	0.1256	0.0662
Cre02.g082350.v5.5:t:1228006-1228139	N6	chromosome_2:1228139-1228347	0.1542	0.3026	0.2871	0.2738	0.2309	0.2353	0.1983	0.1581	0.1004	0.1712	0.178	0.1804	0.3009	0.2354	0.1612	0.1124	0.1421	0.3234	0.1669	0.1307	0.1447	0.1208	0.1383	0.1539	0.1053	0.0771	0.0924
Cre02.g082600.v5.5:s:1252439-1252479	N3	chromosome_2:1252479-1252775	0.0309	0.0301	0.018	0.0491	0.0411	0.0206	0.0041	0.0174	0.0312	0.0251	0.0199	0.0483	0.0493	0.0358	0.0492	0.0593	0.0464	0.0928	0.0473	0.0302	0.0022	0.063	0.0234	0.0388	0.0238	0.0329	0.026
Cre02.g082600.v5.5:s:1255146-1255367	N2	chromosome_2:1255367-1256075	0.1167	0.1392	0.0465	0.1556	0.0789	0.1718	0.1228	0.1755	0.1635	0.1375	0.1461	0.0948	0.1254	0.0864	0.0814	0.1002	0.0437	0.0414	0.0674	0.0558	0.1049	0.1118	0.1103	0.1845	0.1095	0.1291	0.1161
Cre02.g082600.v5.5:t:1252775-1253197	N3	chromosome_2:1252479-1252775	0.05	0.0455	0.034	0.0666	0.0538	0.0237	0.0073	0.0251	0.042	0.0343	0.0305	0.0666	0.0641	0.048	0.0689	0.0915	0.0687	0.1094	0.0643	0.0368	0.0048	0.087	0.0405	0.0442	0.0353	0.0483	0.0362
Cre02.g082600.v5.5:t:1256075-1256570	N2	chromosome_2:1255367-1256075	0.1604	0.127	0.0598	0.1472	0.1157	0.1811	0.1512	0.2168	0.2387	0.1836	0.1746	0.14	0.155	0.0981	0.1022	0.1171	0.0653	0.0451	0.067	0.0754	0.1532	0.1297	0.1217	0.1766	0.1264	0.1341	0.131
Cre02.g083065.v5.5:t:1360492-1360699	N7	chromosome_2:1360227-1360520	0.1187	0.1791	0.0967	0.1495	0.0001	0.2424	0.1282	0.1047	0.1457	0.0001	0.0001	0.0357	0.0001	0.0001	0.0001	0.0001	0.0001	0.2342	0.1398	0.0001	0.1667	0.1198	0.1044	0.024	0.1088	0.1983	0.0682
Cre02.g083354.v5.5:s:1395718-1395801	N2	chromosome_2:1395095-1395718	0.0001	0.0001	0.0001	0.0001	0.0001	0.0001	0.0001	0.1961	0.1848	0.1668	0.2104	0.3212	0.0001	0.0001	0.0001	0.0001	0.0001	0.3912	0.2229	0.0001	0.0001	0.0001	0.0279	0.0001	0.0001	0.0001	0.0001
Cre02.g083354.v5.5:t:1393817-1394257	N2	chromosome_2:1394257-1394865	0.0001	0.0001	0.0001	0.0001	0.0001	0.0001	0.0001	0.198	0.1551	0.1683	0.2159	0.1864	0.0001	0.0001	0.0001	0.0001	0.0001	0.276	0.166	0.0001	0.0001	0.0001	0.3578	0.0001	0.0001	0.0001	0.0001
Cre02.g083750.v5.5:s:1448134-1448370	N3	chromosome_2:1448176-1448529	0.2283	0.0001	0.1023	0.0733	0.0001	0.0001	0.0001	0.0001	0.0001	0.0001	0.0001	0.0001	0.0001	0.0001	0.0001	0.0001	0.0001	0.0001	0.0001	0.0001	0.0001	0.0001	0.0001	0.0001	0.0001	0.0001	0.2313
Cre02.g083750.v5.5:t:1448801-1452467	N3	chromosome_2:1448582-1448801	0.1922	0.0001	0.1796	0.3401	0.0001	0.0001	0.0001	0.0001	0.0001	0.0001	0.0001	0.0001	0.0001	0.0001	0.0001	0.0001	0.0001	0.0001	0.0001	0.0001	0.0001	0.0001	0.0001	0.0001	0.0001	0.0001	0.3231
Cre02.g083850.v5.5:s:1464435-1464976	N3	chromosome_2:1464312-1464435	0.0535	0.0264	0.0212	0.0086	0.1662	0.0129	0.0375	0.0103	0.01	0.0001	0.0137	0.0205	0.0107	0.0207	0.0001	0.0172	0.0001	0.0313	0.0001	0.0001	0.0001	0.0001	0.0259	0.0001	0.0001	0.033	0.0144
Cre02.g083850.v5.5:s:1467688-1467853	N3	chromosome_2:1467054-1467688	0.0951	0.0001	0.0794	0.052	0.0001	0.2461	0.0208	0.0589	0.0539	0.0248	0.0164	0.0084	0.0431	0.0201	0.0238	0.0403	0.0001	0.0001	0.0001	0.0001	0.0001	0.0001	0.0001	0.0001	0.0001	0.0001	0.0001
Cre02.g083850.v5.5:t:1467002-1467054	N3	chromosome_2:1467054-1467688	0.0635	0.0001	0.0001	0.057	0.0198	0.2401	0.0111	0.0442	0.0382	0.0117	0.0104	0.0062	0.0336	0.0107	0.0116	0.0407	0.0001	0.0198	0.0001	0.0001	0.0001	0.0001	0.0001	0.0001	0.0001	0.0001	0.0789
Cre02.g083900.v5.5:t:1473984-1474745	N3	chromosome_2:1473832-1474012	0.2459	0.0001	0.0001	0.0902	0.0001	0.0001	0.0001	0.0652	0.1338	0.0554	0.0838	0.0618	0.1173	0.0522	0.0101	0.0092	0.0001	0.0934	0.1237	0.0001	0.0805	0.0001	0.0334	0.0593	0.0973	0.1142	0.0569
Cre02.g083900.v5.5:t:1475841-1475925	N4	chromosome_2:1475633-1475841	0.1625	0.0001	0.0001	0.3756	0.0001	0.0001	0.0001	0.0001	0.0001	0.0001	0.0001	0.1079	0.2613	0.1496	0.0001	0.3489	0.0001	0.2967	0.2333	0.0001	0.0001	0.4642	0.3215	0.2285	0.2585	0.4382	0.1122
Cre02.g084300.v5.5:s:1517679-1517779	N3	chromosome_2:1517074-1517679	0.0142	0.0463	0.028	0.0347	0.0333	0.0143	0.0141	0.038	0.0327	0.0063	0.0568	0.0125	0.0357	0.0076	0.0425	0.0839	0.0001	0.0095	0.048	0.0606	0.0775	0.0129	0.0786	0.0001	0.0521	0.0315	0.0186
Cre02.g084350.v5.5:s:1522474-1522830	N2	chromosome_2:1522356-1522474	0.225	0.1956	0.1351	0.1829	0.1982	0.1237	0.1649	0.1602	0.1972	0.112	0.1398	0.2033	0.2519	0.0001	0.1807	0.2139	0.0001	0.2129	0.2543	0.2034	0.0568	0.1126	0.1256	0.2419	0.2408	0.1964	0.11
Cre02.g084650.v5.5:s:1547780-1547924	N3	chromosome_2:1547602-1547780	0.0001	0.0001	0.0001	0.0001	0.0001	0.0001	0.0001	0.0001	0.0001	0.0001	0.0167	0.1818	0.0609	0.0001	0.1564	0.0001	0.0001	0.0001	0.1045	0.0001	0.0001	0.0001	0.0001	0.0001	0.0001	0.0971	0.0001
Cre02.g084750.v5.5:s:1558010-1558439	N1	chromosome_2:1557851-1558010	0.6467	0.0001	0.0001	0.441	0.5136	0.4532	0.4459	0.4852	0.3898	0.442	0.509	0.4612	0.369	0.4676	0.4349	0.371	0.3207	0.4098	0.3558	0.3343	0.4412	0.4156	0.3429	0.3981	0.2929	0.3537	0.3582
Cre02.g084750.v5.5:t:1558637-1558733	N4	chromosome_2:1558733-1558909	0.3999	0.0001	0.0001	0.1407	0.1155	0.1037	0.0813	0.1313	0.1224	0.1771	0.1161	0.1771	0.145	0.0849	0.1012	0.0817	0.2509	0.0619	0.1573	0.2434	0.1443	0.1357	0.231	0.2163	0.2395	0.4132	0.3767
Cre02.g084800.v5.5:s:1560859-1561144	N3	chromosome_2:1561144-1561495	0.0001	0.0001	0.0001	0.0001	0.0001	0.0001	0.0001	0.0001	0.0164	0.0071	0.0044	0.0082	0.0098	0.0089	0.0093	0.0023	0.0072	0.0523	0.0145	0.0095	0.0114	0.0456	0.0369	0.0001	0.0001	0.0397	0.0001
Cre02.g084800.v5.5:s:1563559-1563665	N3	chromosome_2:1563665-1564147	0.0001	0.0001	0.0001	0.0001	0.0001	0.0001	0.0001	0.0278	0.1302	0.0466	0.0907	0.138	0.0933	0.0426	0.0406	0.0199	0.0473	0.009	0.0048	0.0082	0.0113	0.0456	0.0095	0.0229	0.021	0.0388	0.0001
Cre02.g084800.v5.5:t:1564147-1564246	N3	chromosome_2:1563665-1564147	0.0001	0.0001	0.0001	0.0001	0.0001	0.0001	0.0001	0.0001	0.0952	0.0475	0.0895	0.1541	0.0922	0.0449	0.0494	0.023	0.0569	0.0109	0.0051	0.0069	0.0127	0.0414	0.0104	0.0279	0.0251	0.0418	0.0001
Cre02.g085100.v5.5:s:1606782-1606863	N3	chromosome_2:1606593-1606782	0.2489	0.0001	0.0656	0.0591	0.0001	0.0835	0.025	0.058	0.0001	0.0001	0.0001	0.0424	0.0001	0.0001	0.0517	0.0625	0.0001	0.0001	0.0624	0.0001	0.0001	0.0001	0.0865	0.028	0.0185	0.0786	0.1302
Cre02.g085300.v5.5:s:1634443-1634561	N3	chromosome_2:1634561-1635071	0.0589	0.0253	0.0563	0.045	0.009	0.0473	0.0259	0.0569	0.0844	0.0762	0.0866	0.042	0.0672	0.0748	0.031	0.0796	0.0301	0.0862	0.0595	0.1039	0.0909	0.0139	0.0067	0.0897	0.0001	0.0295	0.0621
Cre02.g085650.v5.5:t:1659389-1659565	N2	chromosome_2:1659173-1659435	0.3479	0.0001	0.0001	0.1854	0.0001	0.2976	0.1591	0.1785	0.1122	0.0877	0.1406	0.1615	0.0753	0.1099	0.1441	0.0901	0.1607	0.1589	0.0993	0.2268	0.0679	0.1038	0.0388	0.0248	0.0001	0.0302	0.089
Cre02.g086050.v5.5:s:1707791-1708115	N3	chromosome_2:1707542-1707791	0.0115	0.024	0.0159	0.0166	0.0001	0.0001	0.0001	0.021	0.0195	0.0194	0.037	0.0297	0.0098	0.0115	0.0074	0.005	0.0193	0.0637	0.0058	0.037	0.0092	0.1054	0.019	0.032	0.0113	0.0102	0.0144
Cre02.g086050.v5.5:s:1709314-1709469	N3	chromosome_2:1709118-1709314	0.079	0.0798	0.102	0.053	0.0001	0.0831	0.0279	0.0694	0.1947	0.0482	0.0777	0.0505	0.0658	0.0757	0.0532	0.081	0.1269	0.0734	0.0889	0.1116	0.0349	0.0257	0.0505	0.0601	0.0908	0.0489	0.0209
Cre02.g086076.v5.5:s:1711339-1711398	N3	chromosome_2:1711009-1711339	0.0001	0.0001	0.0186	0.0083	0.0001	0.0895	0.1892	0.0492	0.0228	0.0001	0.0602	0.0731	0.0001	0.0001	0.0001	0.0001	0.0001	0.0969	0.0001	0.0001	0.0001	0.0001	0.0001	0.0001	0.0001	0.0001	0.0001
Cre02.g086300.v5.5:s:1735697-1735934	N4	chromosome_2:1735525-1735697	0.2342	0.0186	0.135	0.0821	0.2449	0.1584	0.1439	0.1592	0.1703	0.0692	0.1556	0.1234	0.1757	0.14	0.0508	0.1876	0.0528	0.1344	0.1105	0.1304	0.1007	0.1714	0.2524	0.2515	0.2148	0.2355	0.1744
Cre02.g086350.v5.5:t:1742065-1742267	N2	chromosome_2:1742267-1743043	0.0906	0.0001	0.0001	0.0587	0.0001	0.0001	0.0001	0.0001	0.0001	0.1223	0.1319	0.1118	0.1329	0.2315	0.1645	0.137	0.0674	0.0754	0.0769	0.0651	0.0967	0.0481	0.0554	0.025	0.0933	0.0362	0.0728
Cre02.g086456.v5.5:s:1751681-1751731	N3	chromosome_2:1751488-1751681	0.0605	0.0001	0.0001	0.0001	0.0001	0.0001	0.0001	0.0001	0.0001	0.0001	0.0001	0.0959	0.0001	0.0001	0.0681	0.0882	0.0001	0.1236	0.3591	0.0001	0.0001	0.0001	0.0775	0.0841	0.0001	0.1152	0.0001
Cre02.g086600.v5.5:s:1762764-1762877	N3	chromosome_2:1762607-1762773	0.117	0.0311	0.0191	0.0184	0.0121	0.0128	0.0017	0.0057	0.02	0.0077	0.0012	0.0193	0.0391	0.0232	0.0243	0.0193	0.0171	0.0159	0.0218	0.0184	0.0195	0.024	0.025	0.0051	0.0187	0.0201	0.0154
Cre02.g086750.v5.5:t:1781667-1783448	N4	chromosome_2:1781481-1781670	0.3117	0.2709	0.3253	0.2344	0.0001	0.2189	0.0001	0.0001	0.0001	0.1812	0.2841	0.2306	0.3196	0.0001	0.0001	0.0001	0.0001	0.2343	0.1458	0.3289	0.2518	0.2605	0.1727	0.2249	0.286	0.183	0.0711
Cre02.g086887.v5.5:s:1800209-1800774	N6	chromosome_2:1800774-1802367	0.3761	0.3317	0.0001	0.2268	0.2367	0.3931	0.4028	0.3896	0.4775	0.4357	0.3533	0.4237	0.3877	0.5071	0.3913	0.4354	0.0001	0.3587	0.3583	0.5733	0.1453	0.0001	0.259	0.3157	0.3273	0.4037	0.0001
Cre02.g087450.v5.5:s:1865045-1865167	N3	chromosome_2:1864680-1865062	0.0083	0.0889	0.0001	0.0468	0.0176	0.0055	0.0325	0.0101	0.027	0.0239	0.0019	0.0123	0.0081	0.018	0.0233	0.0097	0.0074	0.0134	0.0229	0.0243	0.0536	0.0217	0.0041	0.065	0.0503	0.0332	0.0071
Cre02.g087500.v5.5:s:1868003-1868211	N3	chromosome_2:1867808-1868003	0.029	0.0298	0.024	0.0122	0.0001	0.0806	0.0226	0.0228	0.0001	0.0001	0.0001	0.0713	0.0001	0.0001	0.0129	0.0218	0.0664	0.0455	0.0166	0.0137	0.0484	0.0579	0.065	0.0227	0.0001	0.0264	0.0001
Cre02.g087950.v5.5:s:1943447-1943723	N3	chromosome_2:1942454-1943447	0.0278	0.0275	0.0273	0.0184	0.0183	0.0035	0.0229	0.0162	0.0158	0.0149	0.0274	0.0149	0.048	0.0223	0.0442	0.0169	0.0058	0.0214	0.0218	0.021	0.0303	0.0178	0.0299	0.0148	0.0163	0.0208	0.0506
Cre02.g087950.v5.5:t:1942341-1942454	N3	chromosome_2:1942454-1943447	0.0388	0.0414	0.0411	0.0237	0.0322	0.006	0.0344	0.0218	0.0276	0.0207	0.0333	0.0167	0.0675	0.0303	0.0609	0.0218	0.0078	0.0282	0.0308	0.0288	0.0631	0.0289	0.0581	0.0206	0.0237	0.0343	0.0703
Cre02.g088400.v5.5:t:2000229-2000405	N3	chromosome_2:1999944-2000232	0.0227	0.0001	0.0001	0.0794	0.0425	0.0271	0.1112	0.0592	0.0577	0.0789	0.1736	0.0363	0.0791	0.1522	0.0001	0.0001	0.0001	0.0001	0.0001	0.0001	0.0001	0.0001	0.0001	0.0001	0.0001	0.0239	0.0001
Cre02.g089050.v5.5:t:2085284-2085622	N6	chromosome_2:2085058-2085284	0.0001	0.0001	0.0001	0.0001	0.0001	0.0001	0.0001	0.3841	0.3602	0.5576	0.6151	0.3961	0.3319	0.2196	0.3346	0.4801	0.2679	0.4726	0.3647	0.3421	0.3562	0.0001	0.2599	0.0001	0.1951	0.3292	0.0001
Cre02.g089400.v5.5:s:2158504-2158604	N3	chromosome_2:2158005-2158504	0.0001	0.0001	0.0001	0.0001	0.0001	0.0001	0.0001	0.0001	0.0001	0.0001	0.0001	0.0001	0.0001	0.0001	0.0001	0.0001	0.0001	0.0001	0.0001	0.0001	0.0001	0.0001	0.0001	0.2045	0.0001	0.2505	0.0001
Cre02.g089850.v5.5:s:2219377-2219456	N6	chromosome_2:2218823-2219416	0.0001	0.0001	0.0001	0.0001	0.0001	0.0001	0.0001	0.3927	0.3816	0.4499	0.3974	0.4774	0.4439	0.4668	0.4477	0.4912	0.4271	0.4804	0.3954	0.4402	0.0001	0.0001	0.0001	0.0001	0.6825	0.0001	0.0001
Cre02.g090900.v5.5:s:2350417-2350693	N3	chromosome_2:2350096-2350417	0.0001	0.0001	0.0001	0.0692	0.0267	0.0001	0.0571	0.0001	0.0317	0.0968	0.0001	0.0203	0.0001	0.0001	0.0096	0.0151	0.0123	0.0064	0.0647	0.0883	0.033	0.0626	0.0481	0.0101	0.02	0.0437	0.0849
Cre02.g090900.v5.5:s:2352295-2352419	N3	chromosome_2:2352144-2352295	0.0001	0.0001	0.0001	0.013	0.0001	0.0279	0.0191	0.0001	0.1488	0.0001	0.0001	0.0856	0.0236	0.0251	0.0261	0.0167	0.1111	0.0408	0.0075	0.0475	0.0125	0.0371	0.0168	0.021	0.0226	0.0783	0.0179
Cre02.g091000.v5.5:t:2372205-2372285	N3	chromosome_2:2371859-2372205	0.0763	0.0451	0.018	0.1253	0.0001	0.1045	0.0207	0.034	0.0447	0.0576	0.0975	0.0361	0.077	0.1	0.0138	0.0096	0.0263	0.0275	0.021	0.0195	0.0598	0.0789	0.0542	0.0398	0.0173	0.0139	0.0191
Cre02.g091193.v5.5:s:2392183-2392504	N3	chromosome_2:2391642-2392187	0.0001	0.0001	0.0145	0.0132	0.0001	0.0176	0.0176	0.0001	0.0179	0.0001	0.0001	0.1108	0.0001	0.0321	0.0922	0.0954	0.1494	0.0416	0.0916	0.0661	0.1465	0.0637	0.05	0.1205	0.0755	0.0708	0.0413
Cre02.g091200.v5.5:t:2397504-2397705	N3	chromosome_2:2397281-2397504	0.0001	0.0001	0.0001	0.0001	0.0001	0.0001	0.0001	0.0001	0.0181	0.0001	0.0001	0.0125	0.012	0.0039	0.0067	0.0032	0.0101	0.0526	0.0286	0.0315	0.0173	0.0038	0.0249	0.0298	0.0258	0.0394	0.024
Cre02.g091350.v5.5:t:2405174-2406366	N3	chromosome_2:2404940-2405174	0.0001	0.0001	0.1078	0.1145	0.1043	0.0001	0.0746	0.0001	0.012	0.0192	0.01	0.0117	0.0075	0.0985	0.0065	0.0245	0.1032	0.0578	0.0115	0.0085	0.0113	0.0119	0.0374	0.0119	0.012	0.0084	0.0117
Cre02.g091400.v5.5:t:2412340-2412473	N3	chromosome_2:2412473-2412561	0.0001	0.0001	0.0001	0.0407	0.0001	0.0217	0.1143	0.096	0.0001	0.0001	0.0001	0.1563	0.0001	0.0001	0.0001	0.0001	0.0001	0.0659	0.0001	0.0001	0.0942	0.0192	0.1088	0.1636	0.052	0.0904	0.0396
Cre02.g091500.v5.5:t:2429723-2430260	N2	chromosome_2:2429556-2429723	0.0001	0.0001	0.0001	0.0001	0.0001	0.0001	0.0001	0.0001	0.0001	0.0391	0.285	0.1638	0.2112	0.1656	0.1117	0.1697	0.0834	0.2784	0.1731	0.0789	0.0001	0.0001	0.0001	0.0001	0.0001	0.0001	0.0001
Cre02.g091750.v5.5:s:2452340-2452409	N4	chromosome_2:2452167-2452340	0.1596	0.0938	0.1059	0.0503	0.0173	0.0866	0.0477	0.0545	0.0723	0.129	0.0913	0.1202	0.205	0.3099	0.2741	0.2816	0.0001	0.2722	0.1673	0.2543	0.305	0.277	0.3814	0.4131	0.2064	0.2399	0.229
Cre02.g091750.v5.5:s:2453273-2453459	N6	chromosome_2:2453112-2453273	0.2103	0.0001	0.0001	0.3322	0.4058	0.3223	0.4524	0.3994	0.3719	0.2259	0.3675	0.397	0.3673	0.0001	0.2851	0.2552	0.226	0.3589	0.2842	0.3327	0.2431	0.2616	0.2999	0.1531	0.3263	0.23	0.4112
Cre02.g091750.v5.5:t:2450212-2450273	N3	chromosome_2:2450273-2450550	0.0308	0.075	0.0064	0.0139	0.0391	0.0147	0.0023	0.0018	0.0168	0.0038	0.0202	0.072	0.0263	0.0482	0.1457	0.0233	0.0001	0.0051	0.0053	0.032	0.0067	0.046	0.0044	0.0537	0.0061	0.0249	0.0036
Cre02.g092284.v5.5:t:2515499-2515615	N3	chromosome_2:2515615-2515903	0.1781	0.0001	0.0001	0.1203	0.0001	0.0513	0.0867	0.0096	0.01	0.0647	0.1018	0.0067	0.1068	0.0362	0.0336	0.0044	0.0433	0.0261	0.0299	0.0059	0.1862	0.0716	0.0375	0.0779	0.1007	0.0817	0.0097
Cre02.g092850.v5.5:t:2563810-2564498	N3	chromosome_2:2563627-2563810	0.0001	0.0001	0.0291	0.0136	0.0001	0.0728	0.0001	0.0135	0.0171	0.012	0.0541	0.0174	0.0046	0.005	0.0051	0.008	0.0203	0.0094	0.0111	0.0243	0.0174	0.0031	0.0024	0.0102	0.0037	0.0028	0.0074
Cre02.g093350.v5.5:t:2681724-2681815	N4	chromosome_2:2681577-2681724	0.0001	0.0001	0.0001	0.6623	0.0001	0.0001	0.0001	0.0001	0.0001	0.487	0.0001	0.4409	0.2915	0.4041	0.3318	0.4965	0.0001	0.4362	0.4852	0.2847	0.3301	0.0001	0.396	0.0001	0.6847	0.5953	0.5675
Cre02.g093700.v5.5:t:2730941-2731020	N1	chromosome_2:2731020-2731106	0.2731	0.0275	0.7268	0.5755	0.0001	0.5468	0.6709	0.6927	0.6445	0.7155	0.619	0.4277	0.5939	0.4671	0.4533	0.3754	0.2342	0.4306	0.3116	0.4665	0.2273	0.1922	0.2348	0.2636	0.3027	0.2477	0.1492
Cre02.g093750.v5.5:t:2734918-2735348	N3	chromosome_2:2735348-2735548	0.0653	0.0703	0.0001	0.0301	0.0001	0.0115	0.0116	0.1621	0.0159	0.0833	0.0381	0.0661	0.0548	0.0763	0.0001	0.0001	0.0001	0.0001	0.0001	0.0001	0.0001	0.0001	0.0001	0.0001	0.0209	0.0741	0.0001
Cre02.g093975.v5.5:s:2760722-2760813	N7	chromosome_2:2760813-2761011	0.2339	0.0001	0.0001	0.1842	0.0001	0.0001	0.0001	0.064	0.0001	0.0537	0.0679	0.0096	0.0656	0.0923	0.0679	0.0125	0.0001	0.0645	0.0263	0.0001	0.0555	0.1468	0.0781	0.1277	0.1064	0.0505	0.2586
Cre02.g093975.v5.5:t:2760722-2760813	N4	chromosome_2:2760635-2760722	0.0001	0.0001	0.0001	0.3422	0.0001	0.0001	0.0001	0.2039	0.1168	0.0001	0.0603	0.3305	0.1965	0.1362	0.0198	0.0719	0.0001	0.1003	0.1898	0.0001	0.1902	0.2749	0.2027	0.4262	0.5492	0.1924	0.1076
Cre02.g093975.v5.5:t:2761133-2761450	N7	chromosome_2:2761057-2761133	0.4105	0.0001	0.0001	0.1754	0.0001	0.0001	0.0001	0.1588	0.0001	0.0123	0.1016	0.0064	0.0982	0.0864	0.0607	0.0084	0.0001	0.0978	0.0176	0.0001	0.0497	0.1007	0.1204	0.1609	0.0427	0.1016	0.2872
Cre02.g094450.v5.5:t:2810088-2811851	N3	chromosome_2:2809683-2810088	0.0609	0.125	0.0791	0.1424	0.0001	0.0001	0.0001	0.0001	0.0001	0.0001	0.0001	0.0001	0.1263	0.0848	0.0413	0.0612	0.0924	0.0351	0.0733	0.08	0.0365	0.0729	0.0663	0.0744	0.0537	0.0575	0.0306
Cre02.g094750.v5.5:s:2853937-2854344	N2	chromosome_2:2853783-2853937	0.0905	0.0001	0.0001	0.119	0.0001	0.0001	0.0766	0.2523	0.3367	0.3443	0.2065	0.3266	0.2931	0.2086	0.2095	0.2186	0.0059	0.1939	0.1725	0.1651	0.0001	0.0001	0.0762	0.0001	0.0001	0.0795	0.0001
Cre02.g095000.v5.5:s:3692186-3692451	N3	chromosome_2:3692024-3692186	0.0001	0.0001	0.1078	0.1161	0.1534	0.1672	0.1281	0.0959	0.1167	0.1347	0.0528	0.0333	0.0504	0.0417	0.038	0.0664	0.0001	0.1116	0.0297	0.0223	0.0001	0.0001	0.0333	0.0001	0.0001	0.0001	0.0001
Cre02.g095046.v5.5:s:3051097-3051698	N3	chromosome_2:3050805-3051097	0.0001	0.0001	0.0001	0.0458	0.0001	0.0001	0.0001	0.0281	0.0001	0.0001	0.0001	0.0001	0.0001	0.0001	0.0001	0.018	0.0417	0.0262	0.0357	0.0001	0.0245	0.0292	0.0096	0.0187	0.0369	0.079	0.0425
Cre02.g095048.v5.5:s:3065970-3066611	N7	chromosome_2:3065796-3065970	0.0001	0.0001	0.0001	0.4059	0.0001	0.0001	0.0001	0.0001	0.0001	0.0001	0.0001	0.0001	0.0001	0.0001	0.0001	0.0001	0.0001	0.0001	0.0001	0.0001	0.25	0.0001	0.5566	0.1692	0.0001	0.3717	0.2408
Cre02.g095048.v5.5:s:3067213-3067765	N3	chromosome_2:3066915-3067213	0.0122	0.0001	0.0001	0.0091	0.0001	0.0096	0.112	0.0186	0.0001	0.0001	0.0581	0.0198	0.0001	0.0208	0.0185	0.1331	0.0197	0.0834	0.0235	0.0001	0.0349	0.1276	0.0714	0.0359	0.1028	0.1302	0.014
Cre02.g095050.v5.5:t:3693917-3694032	N2	chromosome_2:3693725-3693920	0.0001	0.0001	0.0001	0.0001	0.0001	0.0001	0.0001	0.0001	0.2295	0.3815	0.4236	0.3666	0.3855	0.2982	0.3552	0.2706	0.0001	0.4003	0.3468	0.0001	0.0001	0.0001	0.0001	0.0001	0.0001	0.0001	0.0001
Cre02.g095055.v5.5:s:3097105-3097274	N2	chromosome_2:3096991-3097105	0.0001	0.0001	0.0001	0.0001	0.0001	0.0001	0.0001	0.0001	0.0001	0.0001	0.0001	0.1716	0.2615	0.1873	0.211	0.2469	0.1592	0.099	0.2666	0.0001	0.0459	0.0001	0.2064	0.0001	0.0001	0.0001	0.0001
Cre02.g095058.v5.5:s:3111140-3111547	N2	chromosome_2:3110999-3111140	0.0001	0.0001	0.0001	0.0001	0.0001	0.0001	0.0001	0.0001	0.0001	0.1518	0.2356	0.2833	0.0001	0.1618	0.3081	0.2516	0.0001	0.2011	0.051	0.0001	0.0001	0.0001	0.1857	0.0236	0.0001	0.0746	0.0001
Cre02.g095058.v5.5:s:3112103-3112462	N3	chromosome_2:3111541-3112103	0.0001	0.0001	0.0001	0.0001	0.0001	0.0001	0.0001	0.0001	0.0001	0.0001	0.0277	0.0587	0.0001	0.1656	0.0929	0.161	0.0001	0.1468	0.1136	0.0001	0.0001	0.0001	0.1149	0.0001	0.0001	0.0001	0.0001
Cre02.g095088.v5.5:s:3315828-3316128	N3	chromosome_2:3315585-3315828	0.0001	0.0001	0.0001	0.0001	0.0001	0.0001	0.0001	0.0001	0.0001	0.0001	0.0001	0.0001	0.0001	0.0878	0.0001	0.0547	0.0001	0.1518	0.0001	0.0001	0.0001	0.0001	0.0001	0.0001	0.0001	0.0001	0.0001
Cre02.g095090.v5.5:t:3325700-3325923	N7	chromosome_2:3324249-3325700	0.167	0.0888	0.0001	0.1876	0.0001	0.0001	0.0001	0.0001	0.0001	0.0001	0.0001	0.1051	0.0001	0.0001	0.0001	0.1862	0.0001	0.2982	0.1242	0.0001	0.0926	0.0001	0.3119	0.0582	0.1964	0.1356	0.304
Cre02.g095095.v5.5:t:3346180-3346259	N3	chromosome_2:3346027-3346180	0.0422	0.0171	0.0329	0.0061	0.0227	0.0103	0.0634	0.0285	0.1607	0.0001	0.0001	0.1803	0.074	0.0113	0.0082	0.0075	0.0151	0.0196	0.0032	0.0039	0.0018	0.003	0.0028	0.0017	0.0024	0.0023	0.0047
Cre02.g095110.v5.5:t:3415365-3416215	N2	chromosome_2:3415264-3415365	0.1004	0.0721	0.1229	0.1753	0.1948	0.2021	0.1994	0.182	0.1659	0.1495	0.1736	0.1186	0.158	0.218	0.1757	0.1759	0.1839	0.1879	0.1531	0.1741	0.1732	0.1541	0.1492	0.1466	0.1527	0.1705	0.1364
Cre02.g095122.v5.5:t:3484316-3484361	N3	chromosome_2:3484361-3484871	0.0001	0.0095	0.004	0.0014	0.0034	0.0028	0.003	0.0277	0.0229	0.0045	0.0307	0.0141	0.0601	0.034	0.0182	0.0192	0.0203	0.0133	0.0263	0.0089	0.0104	0.0121	0.0121	0.0032	0.0035	0.0097	0.0039
Cre02.g095125.v5.5:t:3507061-3507235	N3	chromosome_2:3506942-3507061	0.0001	0.0001	0.0001	0.0001	0.0001	0.0001	0.0001	0.0001	0.0001	0.0001	0.0001	0.1847	0.0001	0.0276	0.0001	0.0714	0.0455	0.0254	0.0001	0.031	0.0951	0.0252	0.0861	0.0298	0.0001	0.2031	0.0001
Cre02.g095127.v5.5:s:3537441-3537509	N3	chromosome_2:3537509-3537595	0.0563	0.0654	0.0414	0.0243	0.0001	0.0489	0.0001	0.0264	0.0505	0.0302	0.0061	0.0093	0.0891	0.0218	0.0294	0.0405	0.0199	0.0339	0.0295	0.0413	0.0403	0.0434	0.0351	0.0081	0.0314	0.0419	0.0539
Cre02.g095127.v5.5:t:3539269-3539414	N2	chromosome_2:3538992-3539278	0.137	0.0597	0.2341	0.0927	0.0001	0.2147	0.0001	0.0001	0.1044	0.126	0.0814	0.087	0.1027	0.1406	0.0971	0.121	0.0969	0.1431	0.149	0.0414	0.0774	0.13	0.1245	0.0888	0.0932	0.1076	0.1053
Cre02.g095130.v5.5:t:3559001-3559204	N3	chromosome_2:3558808-3559020	0.0035	0.0192	0.0082	0.0057	0.0118	0.0084	0.0083	0.0052	0.0096	0.0088	0.0624	0.0044	0.0069	0.0108	0.0074	0.0044	0.0147	0.0062	0.0053	0.006	0.0033	0.0033	0.0021	0.0026	0.0023	0.0011	0.0023
Cre02.g095134.v5.5:t:3576463-3576566	N3	chromosome_2:3576369-3576497	0.0001	0.0001	0.0001	0.0001	0.0001	0.0001	0.0001	0.0001	0.0001	0.0001	0.0001	0.0001	0.0001	0.0001	0.0001	0.1766	0.0001	0.0001	0.0001	0.1223	0.1111	0.0001	0.2469	0.022	0.1279	0.029	0.0001
Cre02.g095146.v5.5:s:3642840-3642940	N6	chromosome_2:3641399-3642840	0.2124	0.1938	0.1612	0.1543	0.3131	0.1505	0.191	0.0863	0.2607	0.137	0.1303	0.1958	0.1844	0.1915	0.1654	0.1418	0.1769	0.1232	0.2555	0.2558	0.1602	0.198	0.1713	0.1973	0.1938	0.1716	0.1171
Cre02.g095146.v5.5:t:3641325-3641411	N2	chromosome_2:3641399-3642840	0.0931	0.0809	0.0659	0.0702	0.1798	0.0642	0.0809	0.0398	0.1102	0.0752	0.0512	0.0882	0.089	0.0832	0.0768	0.0718	0.0828	0.0711	0.1022	0.1083	0.0741	0.0867	0.0713	0.0891	0.0818	0.0592	0.0471
Cre02.g095200.v5.5:t:3707737-3708054	N3	chromosome_2:3707413-3707737	0.0973	0.0001	0.0001	0.0359	0.0001	0.0597	0.1291	0.0145	0.0001	0.0775	0.0368	0.0456	0.0645	0.0977	0.0436	0.0622	0.079	0.0052	0.1306	0.0299	0.0473	0.0331	0.0603	0.0081	0.0062	0.0607	0.0116
Cre02.g095200.v5.5:t:3709418-3709571	N3	chromosome_2:3709324-3709479	0.0184	0.0001	0.0001	0.0548	0.0159	0.0649	0.0554	0.0556	0.0709	0.0146	0.0722	0.0723	0.034	0.0055	0.0289	0.0208	0.0096	0.0486	0.0445	0.0252	0.069	0.0217	0.0685	0.0188	0.0383	0.0637	0.0115
Cre02.g095500.v5.5:s:3783516-3783621	N3	chromosome_2:3782935-3783516	0.0001	0.0001	0.0001	0.0001	0.0001	0.0001	0.0001	0.0357	0.0626	0.0568	0.0554	0.0118	0.0383	0.0494	0.0254	0.0349	0.04	0.0462	0.0473	0.0512	0.1181	0.1426	0.104	0.0433	0.0662	0.0509	0.0563
Cre02.g095500.v5.5:s:3784247-3784500	N2	chromosome_2:3784088-3784247	0.0001	0.0001	0.0001	0.0001	0.0001	0.0001	0.0001	0.0001	0.0001	0.241	0.2452	0.2971	0.0001	0.3127	0.1568	0.3943	0.0001	0.2738	0.3702	0.0001	0.0001	0.0001	0.1389	0.0001	0.0001	0.2363	0.2739
Cre02.g096000.v5.5:t:3881065-3881200	N3	chromosome_2:3880885-3881134	0.0001	0.0001	0.0306	0.0532	0.0001	0.014	0.0584	0.0104	0.0099	0.0582	0.0061	0.0211	0.0048	0.0536	0.0442	0.0522	0.0699	0.0476	0.0047	0.0292	0.007	0.0708	0.0224	0.0093	0.0101	0.0119	0.064
Cre02.g096300.v5.5:s:3913273-3913493	N1	chromosome_2:3913035-3913273	0.4694	0.4567	0.4688	0.4383	0.4364	0.4176	0.4976	0.4715	0.4546	0.4045	0.5135	0.4209	0.4505	0.4637	0.3696	0.4061	0.4408	0.424	0.3868	0.3906	0.3745	0.3096	0.3747	0.4244	0.3918	0.3983	0.3812
Cre02.g096737.v5.5:t:3974005-3975349	N7	chromosome_2:3973831-3974005	0.0218	0.0001	0.0001	0.1288	0.0001	0.2145	0.0001	0.2181	0.0001	0.0001	0.0001	0.017	0.0104	0.1625	0.1577	0.0936	0.0628	0.0838	0.1691	0.1676	0.1515	0.1731	0.1843	0.277	0.3431	0.1359	0.2163
Cre02.g096900.v5.5:t:3990305-3990504	N2	chromosome_2:3989930-3990308	0.1251	0.1173	0.0942	0.204	0.0001	0.0001	0.0001	0.0893	0.0001	0.0774	0.0705	0.1764	0.2081	0.0115	0.0089	0.122	0.0001	0.1362	0.102	0.1891	0.1663	0.2075	0.1376	0.141	0.1203	0.1067	0.0076
Cre02.g097450.v5.5:s:4071626-4071995	N7	chromosome_2:4071995-4072174	0.0468	0.0229	0.0221	0.084	0.0035	0.0347	0.0311	0.0547	0.0998	0.0333	0.0227	0.0318	0.0308	0.0511	0.1225	0.1259	0.1142	0.1089	0.1509	0.1323	0.0613	0.0969	0.1105	0.0897	0.0831	0.0823	0.0908
Cre02.g098600.v5.5:s:4202287-4202385	N7	chromosome_2:4202016-4202287	0.0718	0.0001	0.0001	0.0764	0.0001	0.1962	0.0001	0.0001	0.0001	0.1182	0.0786	0.1887	0.0001	0.2151	0.2708	0.1673	0.0839	0.1923	0.1405	0.1136	0.0001	0.225	0.2249	0.0001	0.1788	0.2925	0.2017
Cre02.g099500.v5.5:s:4365176-4365292	N6	chromosome_2:4365292-4365488	0.3731	0.2425	0.1556	0.188	0.1723	0.3273	0.2043	0.1947	0.2308	0.2897	0.4119	0.2642	0.1904	0.3096	0.1994	0.263	0.273	0.2815	0.2605	0.278	0.275	0.2293	0.2251	0.285	0.2276	0.2354	0.2554
Cre02.g099950.v5.5:s:4441067-4441281	N3	chromosome_2:4440536-4441067	0.0001	0.0001	0.0001	0.0001	0.0001	0.1254	0.0001	0.0001	0.0001	0.0001	0.0001	0.0681	0.0001	0.0001	0.0516	0.1368	0.1046	0.1652	0.099	0.1674	0.0001	0.0318	0.0534	0.0001	0.0001	0.0001	0.0001
Cre02.g099950.v5.5:t:4442135-4442228	N4	chromosome_2:4442228-4442646	0.0001	0.0001	0.0001	0.2712	0.0001	0.0001	0.0001	0.0001	0.0001	0.0001	0.0001	0.2398	0.0001	0.0001	0.2956	0.3455	0.166	0.2642	0.2692	0.3772	0.3668	0.3455	0.2477	0.0001	0.2833	0.2152	0.0001
Cre02.g100250.v5.5:s:4471466-4471583	N2	chromosome_2:4471583-4471762	0.3155	0.0001	0.0001	0.2511	0.0001	0.0691	0.1714	0.0622	0.0554	0.1729	0.1776	0.0803	0.2295	0.19	0.0904	0.0955	0.08	0.0462	0.0261	0.0888	0.0141	0.0508	0.0569	0.0081	0.0313	0.0506	0.059
Cre02.g100250.v5.5:t:4472145-4472782	N2	chromosome_2:4471830-4472145	0.4299	0.0001	0.0001	0.3719	0.0001	0.0923	0.2027	0.1694	0.0895	0.1729	0.0587	0.21	0.2608	0.2631	0.0516	0.1066	0.0277	0.0706	0.0439	0.0261	0.1123	0.0513	0.0447	0.082	0.0106	0.0759	0.0939
Cre02.g101000.v5.5:t:4611283-4611692	N7	chromosome_2:4611180-4611283	0.0001	0.0001	0.1261	0.0141	0.0001	0.0237	0.0001	0.0001	0.0883	0.0294	0.0592	0.1622	0.0517	0.0001	0.0156	0.1501	0.0001	0.1218	0.1062	0.0001	0.1016	0.0925	0.1492	0.0522	0.0294	0.3266	0.0001
Cre02.g101150.v5.5:s:4632029-4633575	N3	chromosome_2:4631629-4632029	0.4513	0.0001	0.0001	0.5113	0.0001	0.6617	0.0001	0.3552	0.0001	0.0001	0.0001	0.0001	0.0001	0.0001	0.0001	0.0001	0.0001	0.0001	0.0001	0.0001	0.0001	0.0001	0.0001	0.0001	0.0001	0.0001	0.0001
Cre02.g101300.v5.5:t:4651855-4651976	N3	chromosome_2:4651700-4651855	0.0836	0.0001	0.0001	0.1275	0.0459	0.0864	0.0985	0.0532	0.0449	0.1252	0.0216	0.0662	0.0654	0.0201	0.1329	0.0264	0.0743	0.049	0.0218	0.0001	0.0001	0.0001	0.1179	0.0001	0.0001	0.1659	0.0001
Cre02.g101300.v5.5:t:4652095-4655210	N3	chromosome_2:4651976-4652115	0.0146	0.0455	0.0001	0.0135	0.0252	0.0285	0.0287	0.0049	0.006	0.0062	0.0052	0.0094	0.0219	0.1885	0.0475	0.0404	0.0516	0.0394	0.0239	0.0001	0.0001	0.0001	0.025	0.0254	0.0001	0.02	0.0001
Cre02.g101750.v5.5:t:4697496-4697539	N2	chromosome_2:4697366-4697499	0.0001	0.0001	0.0001	0.0001	0.0001	0.0001	0.0001	0.0001	0.0001	0.0001	0.1608	0.2089	0.2612	0.0624	0.0001	0.275	0.0001	0.0552	0.3409	0.0001	0.0001	0.0001	0.0001	0.0001	0.0001	0.0001	0.0001
Cre02.g103200.v5.5:s:4845282-4845327	N3	chromosome_2:4845327-4845817	0.0001	0.0001	0.0001	0.0001	0.0001	0.0001	0.0001	0.0001	0.0001	0.0001	0.0001	0.1409	0.123	0.043	0.0001	0.1006	0.0001	0.0892	0.0281	0.0001	0.0191	0.0578	0.126	0.0444	0.0136	0.0389	0.0234
Cre02.g103700.v5.5:t:4927394-4927500	N3	chromosome_2:4927237-4927394	0.0001	0.0001	0.0451	0.0168	0.0001	0.0199	0.0195	0.0134	0.0916	0.039	0.0091	0.0184	0.008	0.0143	0.0067	0.0087	0.0036	0.006	0.0027	0.0035	0.0167	0.0118	0.0133	0.0038	0.0133	0.0029	0.0069
Cre02.g104150.v5.5:t:4990585-4990704	N3	chromosome_2:4990455-4990597	0.0001	0.0001	0.0001	0.0001	0.0001	0.0001	0.0001	0.0001	0.0001	0.0294	0.0129	0.0805	0.0079	0.0127	0.0094	0.0085	0.0166	0.0086	0.0172	0.0221	0.0001	0.0001	0.0001	0.0001	0.0001	0.0001	0.0001
Cre02.g104300.v5.5:s:5017985-5018080	N7	chromosome_2:5017791-5017985	0.1667	0.0001	0.0001	0.1276	0.0001	0.0001	0.0001	0.0167	0.0001	0.0001	0.0001	0.0742	0.0001	0.0596	0.0831	0.147	0.1334	0.1424	0.0336	0.2181	0.1816	0.125	0.1564	0.1796	0.1493	0.172	0.1013
Cre02.g104350.v5.5:s:5021995-5022187	N3	chromosome_2:5021801-5022049	0.0188	0.0118	0.0462	0.0028	0.0199	0.014	0.0107	0.0148	0.0255	0.0149	0.0328	0.0468	0.0293	0.0484	0.0667	0.0919	0.0785	0.0679	0.075	0.0694	0.046	0.1137	0.0329	0.0937	0.1215	0.0705	0.0501
Cre02.g104350.v5.5:t:5023752-5023850	N6	chromosome_2:5023850-5024011	0.2712	0.3889	0.2855	0.2842	0.5166	0.3014	0.257	0.2963	0.3511	0.3254	0.2503	0.2869	0.3391	0.2639	0.1967	0.244	0.2646	0.2546	0.2622	0.2534	0.2415	0.2182	0.1597	0.3167	0.1723	0.1303	0.1716
Cre02.g104650.v5.5:s:5051103-5051451	N6	chromosome_2:5050920-5051103	0.1964	0.1904	0.1703	0.1555	0.1252	0.2641	0.1216	0.21	0.1826	0.083	0.1179	0.2298	0.174	0.1757	0.159	0.2015	0.1875	0.1629	0.1055	0.1007	0.1807	0.1892	0.1919	0.1193	0.1944	0.1627	0.2409
Cre02.g104650.v5.5:s:5054463-5054623	N3	chromosome_2:5054278-5054484	0.0105	0.0054	0.0044	0.0114	0.0154	0.083	0.0112	0.0391	0.0086	0.0049	0.0735	0.0023	0.003	0.006	0.0307	0.0025	0.0057	0.012	0.0054	0.0047	0.0105	0.0025	0.0086	0.002	0.0135	0.0132	0.0027
Cre02.g104950.v5.5:s:5098160-5098225	N3	chromosome_2:5097848-5098160	0.0153	0.0001	0.0001	0.019	0.0001	0.0134	0.0159	0.0144	0.0112	0.0238	0.0318	0.0278	0.0313	0.0754	0.065	0.0755	0.0755	0.0416	0.0648	0.0833	0.0159	0.0001	0.0672	0.0001	0.0001	0.0838	0.0001
Cre02.g104951.v5.5:s:5108578-5108642	N3	chromosome_2:5108469-5108596	0.0837	0.0001	0.0001	0.0001	0.0001	0.0312	0.0789	0.0296	0.0001	0.0187	0.1035	0.0612	0.0408	0.0122	0.0439	0.0457	0.0184	0.0625	0.0143	0.0001	0.0248	0.1154	0.0001	0.0001	0.0001	0.0001	0.0001
Cre02.g105450.v5.5:t:5168484-5168624	N2	chromosome_2:5168044-5168484	0.2728	0.1256	0.071	0.2619	0.0001	0.0505	0.0001	0.1378	0.2551	0.1364	0.1882	0.1969	0.1673	0.0649	0.1317	0.2524	0.2329	0.1135	0.2053	0.1864	0.1716	0.1435	0.1593	0.1064	0.1446	0.203	0.1874
Cre02.g105700.v5.5:s:5195962-5196216	N3	chromosome_2:5196216-5196439	0.0001	0.0001	0.0001	0.2264	0.0001	0.1387	0.0001	0.0001	0.0001	0.0001	0.0001	0.0001	0.0001	0.0001	0.0001	0.0001	0.0001	0.0001	0.0001	0.0001	0.0001	0.0001	0.0001	0.0001	0.0001	0.0001	0.0001
Cre02.g106450.v5.5:s:5268318-5269052	N6	chromosome_2:5268158-5268318	0.3113	0.3616	0.0001	0.3208	0.4147	0.3443	0.4184	0.2881	0.4607	0.4381	0.3356	0.3406	0.3848	0.3969	0.0001	0.0001	0.0001	0.0001	0.0001	0.0001	0.0001	0.0001	0.3524	0.0001	0.204	0.3968	0.0001
Cre02.g106700.v5.5:s:5299537-5299680	N3	chromosome_2:5299383-5299537	0.0832	0.0312	0.0339	0.0099	0.0226	0.0287	0.0118	0.0118	0.0217	0.0001	0.0604	0.0349	0.011	0.0001	0.0585	0.0085	0.023	0.0088	0.0098	0.0142	0.0087	0.0077	0.0159	0.0079	0.0068	0.006	0.0258
Cre02.g106950.v5.5:t:5321455-5321512	N3	chromosome_2:5321298-5321455	0.1492	0.1479	0.0946	0.0554	0.0131	0.0315	0.0096	0.0615	0.0382	0.059	0.0097	0.0026	0.0069	0.0081	0.0068	0.0166	0.0099	0.0057	0.0078	0.013	0.0064	0.0072	0.004	0.0068	0.0321	0.0034	0.0056
Cre02.g107050.v5.5:s:5337298-5337552	N3	chromosome_2:5337186-5337298	0.0001	0.0001	0.0278	0.0094	0.0001	0.0516	0.0199	0.0119	0.0249	0.0144	0.0097	0.0175	0.0151	0.0078	0.0056	0.011	0.0107	0.0652	0.0069	0.0398	0.006	0.0058	0.0133	0.0047	0.0046	0.0083	0.0051
Cre02.g107150.v5.5:s:5367972-5367989	N3	chromosome_2:5367989-5370136	0.0558	0.0062	0.001	0.0012	0.0002	0.0001	0.0001	0.0001	0.0021	0.0036	0.001	0.002	0.0054	0.0054	0.0127	0.013	0.0121	0.0247	0.026	0.0314	0.0327	0.0148	0.0352	0.0247	0.0255	0.064	0.0265
Cre02.g107150.v5.5:t:5370136-5370602	N3	chromosome_2:5367989-5370136	0.0449	0.0043	0.0006	0.0011	0.0001	0.0001	0.0001	0.0001	0.0022	0.0041	0.0011	0.0024	0.0056	0.0061	0.0136	0.012	0.0148	0.0244	0.0263	0.0378	0.034	0.0176	0.0382	0.0265	0.0262	0.0679	0.0313
Cre02.g107400.v5.5:s:5418556-5419377	N2	chromosome_2:5418272-5418556	0.0001	0.0001	0.0001	0.119	0.0201	0.1523	0.1055	0.1328	0.0841	0.1447	0.0543	0.1148	0.2155	0.1173	0.0795	0.0944	0.104	0.1154	0.0956	0.1697	0.1427	0.1024	0.1375	0.1337	0.2226	0.1634	0.0523
Cre02.g107400.v5.5:s:5420826-5421167	N3	chromosome_2:5420624-5420826	0.0001	0.0001	0.0001	0.0168	0.0001	0.1214	0.0718	0.0136	0.1319	0.0141	0.0398	0.036	0.02	0.0309	0.0227	0.0122	0.0336	0.021	0.0601	0.0251	0.0221	0.0252	0.1544	0.0171	0.0681	0.04	0.0438
Cre02.g107400.v5.5:t:5417105-5417252	N3	chromosome_2:5417252-5417408	0.0001	0.0001	0.0001	0.0525	0.0001	0.0186	0.0001	0.0001	0.0111	0.0001	0.0121	0.1097	0.0326	0.033	0.015	0.0093	0.0895	0.0134	0.0128	0.0169	0.0124	0.064	0.0503	0.0165	0.0111	0.0074	0.0104
Cre02.g107500.v5.5:t:5427049-5427970	N4	chromosome_2:5426936-5427049	0.3681	0.0001	0.0001	0.1885	0.0001	0.0001	0.0001	0.0656	0.0001	0.0001	0.1963	0.2982	0.0001	0.086	0.0665	0.1563	0.0001	0.2571	0.1728	0.1696	0.1018	0.2587	0.1961	0.2247	0.0884	0.2145	0.0936
Cre02.g107550.v5.5:t:5435473-5435542	N3	chromosome_2:5435542-5435717	0.0685	0.0256	0.0352	0.0265	0.0277	0.035	0.0138	0.0203	0.0274	0.0038	0.0107	0.0057	0.0214	0.0051	0.0026	0.0018	0.0042	0.0104	0.0027	0.0035	0.0037	0.0036	0.0017	0.0038	0.003	0.002	0.0026
Cre02.g108500.v5.5:s:5530256-5532615	N3	chromosome_2:5530148-5530434	0.0001	0.0001	0.0001	0.0001	0.0001	0.0001	0.0001	0.0001	0.0001	0.0001	0.0001	0.0001	0.0001	0.0001	0.0001	0.0148	0.0001	0.0001	0.0001	0.0001	0.0212	0.0156	0.0596	0.0755	0.0083	0.0618	0.055
Cre02.g109000.v5.5:t:5585981-5586092	N4	chromosome_2:5585800-5585984	0.372	0.0001	0.0001	0.2783	0.0001	0.0001	0.0001	0.2413	0.0001	0.44	0.4002	0.4619	0.0001	0.3426	0.3071	0.507	0.0001	0.4103	0.368	0.3874	0.0001	0.0001	0.478	0.365	0.2461	0.39	0.4022
Cre02.g109250.v5.5:t:5618357-5618413	N3	chromosome_2:5618156-5618357	0.0083	0.0575	0.0262	0.0259	0.015	0.0358	0.0179	0.0001	0.0687	0.0638	0.0106	0.0063	0.0964	0.0143	0.0056	0.0142	0.0585	0.0052	0.0203	0.0373	0.0082	0.0067	0.021	0.016	0.0085	0.0038	0.0217
Cre02.g109600.v5.5:s:5651985-5652012	N3	chromosome_2:5651422-5651985	0.0726	0.0035	0.0022	0.0074	0.0031	0.0184	0.0109	0.0164	0.0135	0.0233	0.0619	0.0126	0.082	0.0112	0.0001	0.0091	0.0124	0.0375	0.0091	0.0105	0.0058	0.0069	0.0043	0.0049	0.0094	0.006	0.007
Cre02.g109600.v5.5:t:5651315-5651422	N3	chromosome_2:5651422-5651985	0.0809	0.0126	0.0085	0.0094	0.0085	0.0231	0.0157	0.0215	0.0212	0.0383	0.0978	0.0178	0.1185	0.0001	0.0001	0.0143	0.0251	0.058	0.0152	0.0001	0.0193	0.0136	0.0082	0.0177	0.0186	0.0152	0.0112
Cre02.g109800.v5.5:s:5680327-5680468	N3	chromosome_2:5680245-5680327	0.0486	0.0001	0.0001	0.1134	0.0001	0.0001	0.0001	0.0001	0.0001	0.0687	0.0581	0.0305	0.0001	0.0001	0.053	0.0618	0.0228	0.1345	0.0192	0.0001	0.0001	0.0001	0.0228	0.0001	0.0001	0.0001	0.0001
Cre02.g110000.v5.5:s:5692888-5693773	N3	chromosome_2:5692747-5692894	0.0776	0.0001	0.0001	0.1098	0.0001	0.0865	0.1136	0.0001	0.1342	0.0001	0.2412	0.0927	0.0652	0.0001	0.109	0.0425	0.0332	0.0119	0.0379	0.0179	0.0162	0.0161	0.0627	0.1293	0.0113	0.0961	0.0485
Cre02.g110050.v5.5:s:5705257-5705376	N4	chromosome_2:5705376-5705972	0.0001	0.0001	0.0001	0.0001	0.0001	0.0001	0.0001	0.0001	0.0001	0.0001	0.277	0.1243	0.0001	0.0001	0.0001	0.2846	0.0001	0.2519	0.1845	0.2018	0.3318	0.3811	0.2611	0.1214	0.2506	0.2792	0.0001
Cre02.g110200.v5.5:s:5726362-5727016	N3	chromosome_2:5726234-5726362	0.0044	0.0106	0.0407	0.0572	0.0595	0.0069	0.0079	0.0083	0.0067	0.0056	0.0041	0.0098	0.0041	0.0029	0.0129	0.0168	0.0039	0.0028	0.0124	0.0044	0.0027	0.0036	0.0017	0.0028	0.0182	0.0013	0.0087
Cre02.g110250.v5.5:t:5729997-5730335	N3	chromosome_2:5729925-5730015	0.0107	0.0256	0.0098	0.0035	0.0096	0.0057	0.007	0.0052	0.0144	0.0068	0.0041	0.0783	0.0036	0.0018	0.0019	0.0014	0.0063	0.0024	0.0028	0.0029	0.0034	0.0052	0.0023	0.0029	0.0032	0.0016	0.0064
Cre02.g110850.v5.5:t:5805806-5805965	N3	chromosome_2:5805660-5805872	0.0069	0.012	0.0129	0.018	0.0001	0.0511	0.0068	0.0067	0.0086	0.0124	0.0069	0.0041	0.0492	0.006	0.066	0.0033	0.0101	0.0036	0.0223	0.0054	0.0159	0.0035	0.0168	0.0036	0.005	0.002	0.0031
Cre02.g111108.v5.5:t:5836131-5836443	N3	chromosome_2:5835907-5836131	0.0185	0.0001	0.0001	0.0001	0.0001	0.0001	0.0001	0.063	0.0335	0.0391	0.0001	0.0269	0.0001	0.0001	0.0217	0.0123	0.0001	0.0338	0.0169	0.0347	0.0086	0.026	0.0043	0.0156	0.0641	0.02	0.0342
Cre02.g111150.v5.5:s:5840002-5840130	N3	chromosome_2:5840130-5840729	0.0106	0.0001	0.0001	0.0126	0.0001	0.0001	0.012	0.0101	0.0679	0.0052	0.0026	0.0151	0.0302	0.0045	0.0288	0.0196	0.0001	0.032	0.0061	0.0729	0.0593	0.0336	0.0557	0.0076	0.0069	0.0152	0.0084
Cre02.g111150.v5.5:s:5842531-5842629	N3	chromosome_2:5842629-5843126	0.0259	0.0001	0.0001	0.0001	0.0001	0.0001	0.0222	0.0001	0.0112	0.009	0.0451	0.0178	0.0055	0.022	0.0395	0.0539	0.0001	0.0258	0.0745	0.0584	0.1747	0.0001	0.0958	0.0523	0.1421	0.1218	0.0001
Cre02.g111150.v5.5:t:5840606-5840820	N3	chromosome_2:5840130-5840729	0.0313	0.0001	0.0001	0.0294	0.0001	0.0001	0.0001	0.0141	0.0585	0.0081	0.0056	0.0158	0.0342	0.0084	0.029	0.0212	0.0277	0.0261	0.011	0.0815	0.0608	0.0369	0.0527	0.0121	0.0123	0.0263	0.0162
Cre02.g111150.v5.5:t:5843126-5843284	N7	chromosome_2:5842629-5843126	0.0184	0.0001	0.0001	0.0001	0.0001	0.0223	0.0196	0.015	0.0081	0.0067	0.0337	0.0162	0.0042	0.0193	0.0292	0.0387	0.0001	0.0245	0.0593	0.0531	0.1646	0.055	0.0887	0.0451	0.1172	0.1047	0.1374
Cre02.g111200.v5.5:s:5851090-5851107	N3	chromosome_2:5850632-5851094	0.0271	0.0174	0.0084	0.0401	0.0001	0.0083	0.0257	0.0629	0.0381	0.0495	0.0545	0.058	0.0362	0.012	0.0079	0.041	0.0129	0.0092	0.0439	0.0497	0.0068	0.0315	0.0462	0.006	0.0477	0.0128	0.005
Cre02.g111300.v5.5:s:5859476-5859918	N2	chromosome_2:5859271-5859796	0.1248	0.0001	0.0001	0.0429	0.0091	0.1137	0.077	0.1752	0.1901	0.0618	0.0989	0.185	0.081	0.0875	0.1162	0.1342	0.1529	0.0896	0.187	0.2216	0.1622	0.1857	0.1283	0.1071	0.1272	0.2559	0.2769
Cre02.g111350.v5.5:s:5878711-5878895	N3	chromosome_2:5878536-5878758	0.0001	0.0001	0.0001	0.0001	0.0001	0.0001	0.0001	0.0001	0.0001	0.0001	0.1347	0.0403	0.0226	0.0277	0.0001	0.0001	0.0001	0.1403	0.0001	0.0001	0.0001	0.0001	0.0001	0.0001	0.0001	0.0001	0.0001
Cre02.g111350.v5.5:s:5880494-5880677	N3	chromosome_2:5880286-5880494	0.0001	0.0001	0.0001	0.0001	0.0001	0.0001	0.0001	0.0001	0.0001	0.0001	0.0001	0.1796	0.0001	0.0001	0.0001	0.0001	0.0001	0.0001	0.0209	0.0001	0.0001	0.0001	0.0001	0.0001	0.0001	0.0001	0.0001
Cre02.g111500.v5.5:s:5901938-5902159	N4	chromosome_2:5901501-5901938	0.1389	0.0001	0.0001	0.1288	0.0001	0.0001	0.0001	0.0001	0.0001	0.0001	0.0001	0.1589	0.0001	0.0001	0.1919	0.1884	0.0001	0.0001	0.3848	0.0001	0.2718	0.0001	0.2778	0.3803	0.2491	0.2955	0.2491
Cre02.g111950.v5.5:t:5946472-5946556	N7	chromosome_2:5946309-5946472	0.0001	0.0001	0.0001	0.0274	0.0001	0.0001	0.075	0.0001	0.0001	0.0001	0.0001	0.0993	0.0001	0.0198	0.1192	0.0653	0.0001	0.0251	0.2785	0.1154	0.1198	0.0836	0.0127	0.0951	0.0918	0.0899	0.0765
Cre02.g112400.v5.5:s:6022550-6022745	N3	chromosome_2:6022346-6022555	0.0001	0.0001	0.0001	0.0001	0.0001	0.0001	0.0001	0.0001	0.0781	0.0186	0.2212	0.0914	0.0139	0.0305	0.0425	0.0381	0.0175	0.0308	0.0363	0.0088	0.0129	0.0168	0.085	0.0611	0.1167	0.1402	0.0777
Cre02.g113000.v5.5:t:6085529-6085600	N3	chromosome_2:6085600-6085744	0.0001	0.0001	0.0001	0.0001	0.0001	0.0001	0.0001	0.0151	0.0166	0.0089	0.0961	0.0034	0.1023	0.0338	0.0211	0.015	0.0068	0.0459	0.0189	0.0059	0.0267	0.0107	0.0507	0.0119	0.035	0.0051	0.0001
Cre02.g113900.v5.5:s:6205993-6206031	N3	chromosome_2:6206031-6206222	0.0001	0.0001	0.0001	0.0001	0.0001	0.0001	0.0001	0.0001	0.0001	0.0001	0.0001	0.0001	0.0001	0.1553	0.0001	0.0001	0.0001	0.0001	0.0001	0.0001	0.0001	0.0001	0.0001	0.0001	0.0001	0.0001	0.0001
Cre02.g113900.v5.5:t:6205021-6205159	N3	chromosome_2:6204881-6205021	0.0001	0.0001	0.0001	0.0001	0.0001	0.0001	0.0001	0.0001	0.0776	0.046	0.0001	0.0635	0.1296	0.0252	0.0159	0.1185	0.0001	0.0187	0.0001	0.0001	0.0001	0.0001	0.0001	0.0001	0.0001	0.0001	0.0001
Cre02.g113900.v5.5:t:6206185-6206378	N3	chromosome_2:6206031-6206222	0.0001	0.0001	0.0001	0.0001	0.0001	0.0001	0.0001	0.0001	0.0001	0.0001	0.0001	0.0001	0.0001	0.173	0.0001	0.0001	0.0001	0.0001	0.0001	0.0001	0.0001	0.0001	0.0001	0.0001	0.0001	0.0001	0.0001
Cre02.g114350.v5.5:s:6268030-6268328	N3	chromosome_2:6267910-6268191	0.1074	0.0001	0.0001	0.0195	0.0001	0.0301	0.0001	0.0001	0.0001	0.0001	0.0186	0.0001	0.0001	0.0176	0.0001	0.0098	0.0001	0.0001	0.0133	0.0001	0.0169	0.0179	0.0165	0.0208	0.0001	0.0108	0.0001
Cre02.g114500.v5.5:s:6280371-6280584	N3	chromosome_2:6280107-6280371	0.0001	0.0001	0.0001	0.0001	0.0001	0.0001	0.1389	0.2143	0.0001	0.0001	0.0001	0.1156	0.0001	0.0001	0.0001	0.0673	0.0001	0.0001	0.0001	0.0001	0.1967	0.0001	0.217	0.1011	0.0933	0.0578	0.0001
Cre02.g114900.v5.5:t:6317269-6317394	N3	chromosome_2:6317112-6317269	0.0538	0.0001	0.0682	0.011	0.0788	0.1013	0.022	0.0597	0.0001	0.0001	0.1258	0.0622	0.0001	0.0001	0.0278	0.0826	0.0001	0.1762	0.0888	0.1501	0.0807	0.0333	0.0055	0.0084	0.0475	0.0471	0.0743
Cre02.g115150.v5.5:t:6334076-6335083	N6	chromosome_2:6333669-6334076	0.236	0.2205	0.2121	0.2489	0.2388	0.2262	0.2162	0.2303	0.2602	0.2146	0.2825	0.2562	0.2372	0.2093	0.2216	0.2205	0.2317	0.2823	0.2036	0.1972	0.2844	0.1546	0.2389	0.2354	0.194	0.2451	0.2496
Cre02.g115650.v5.5:t:6428192-6428284	N3	chromosome_2:6427981-6428192	0.0001	0.0001	0.0265	0.02	0.0001	0.0294	0.0178	0.0714	0.016	0.106	0.0451	0.0427	0.0867	0.1132	0.0239	0.1028	0.0001	0.0921	0.0001	0.0756	0.0001	0.0001	0.0001	0.0001	0.0001	0.0001	0.0001
Cre02.g115750.v5.5:t:6433025-6433218	N3	chromosome_2:6432833-6433095	0.0001	0.0001	0.0001	0.0208	0.0001	0.0001	0.0001	0.01	0.0168	0.0147	0.0453	0.1053	0.0125	0.0072	0.0058	0.0051	0.0132	0.0311	0.0069	0.0502	0.0068	0.0066	0.0232	0.0449	0.01	0.0041	0.0804
Cre02.g116250.v5.5:t:6485276-6485524	N3	chromosome_2:6485057-6485294	0.0001	0.0001	0.0001	0.01	0.0179	0.0086	0.0144	0.0275	0.0258	0.0122	0.0161	0.0056	0.0432	0.0073	0.0101	0.0163	0.0592	0.0246	0.0223	0.0337	0.007	0.0472	0.0353	0.0055	0.0089	0.0148	0.0119
Cre02.g116600.v5.5:s:6515067-6515192	N6	chromosome_2:6515192-6516195	0.3972	0.0001	0.6385	0.4956	0.2708	0.4035	0.0001	0.4787	0.4108	0.4341	0.4924	0.3476	0.4866	0.3722	0.2867	0.3065	0.0001	0.4029	0.2865	0.3096	0.0001	0.0001	0.2381	0.0001	0.2677	0.2199	0.0001
Cre02.g116600.v5.5:t:6513760-6513963	N3	chromosome_2:6513467-6513760	0.0065	0.0136	0.0109	0.0035	0.0077	0.0068	0.0054	0.0045	0.0132	0.0157	0.0121	0.0604	0.0024	0.0121	0.0028	0.0103	0.0081	0.0032	0.0042	0.0063	0.0061	0.0074	0.0056	0.0132	0.0075	0.0068	0.0092
Cre02.g116600.v5.5:t:6516195-6516819	N6	chromosome_2:6515192-6516195	0.3939	0.1802	0.5362	0.387	0.0001	0.3009	0.3744	0.3448	0.2917	0.3844	0.389	0.3289	0.3828	0.2491	0.1711	0.2499	0.1872	0.2141	0.2215	0.2101	0.0863	0.1689	0.1105	0.2107	0.1864	0.1257	0.3078
Cre02.g117050.v5.5:s:6568665-6568927	N2	chromosome_2:6568927-6569161	0.0519	0.0067	0.0343	0.0688	0.0383	0.0332	0.0451	0.0767	0.0322	0.1499	0.1616	0.2375	0.1569	0.1874	0.1395	0.1669	0.0986	0.0625	0.0944	0.1369	0.0514	0.0366	0.0341	0.039	0.0449	0.0525	0.0602
Cre02.g117050.v5.5:t:6569220-6569704	N2	chromosome_2:6569202-6569530	0.0373	0.0065	0.0339	0.0366	0.0372	0.0232	0.0437	0.0454	0.0035	0.048	0.1042	0.2015	0.1263	0.1405	0.1137	0.1111	0.0733	0.0509	0.099	0.0999	0.0171	0.0161	0.0287	0.0226	0.0336	0.0219	0.0476
Cre02.g117050.v5.5:t:6570814-6570965	N3	chromosome_2:6570756-6570854	0.0451	0.0436	0.0236	0.0289	0.0083	0.0477	0.0499	0.022	0.0634	0.0224	0.0276	0.0608	0.0309	0.0186	0.0293	0.0437	0.0257	0.0644	0.0199	0.072	0.0748	0.0162	0.0509	0.039	0.0547	0.0508	0.0368
Cre02.g117050.v5.5:t:6572612-6572691	N6	chromosome_2:6572430-6572612	0.2782	0.3069	0.3042	0.2178	0.159	0.3418	0.1698	0.2681	0.2732	0.1609	0.1943	0.1949	0.2893	0.2042	0.2907	0.2542	0.1957	0.3115	0.3006	0.3309	0.2563	0.2524	0.3167	0.2644	0.2892	0.2728	0.281
Cre02.g117900.v5.5:s:6700785-6700963	N3	chromosome_2:6700651-6700785	0.0214	0.0936	0.0344	0.0083	0.021	0.0175	0.0001	0.0637	0.0419	0.0256	0.0048	0.0132	0.0347	0.0064	0.0139	0.0297	0.0562	0.0463	0.0286	0.0058	0.0179	0.0318	0.0306	0.0228	0.0128	0.0848	0.0479
Cre02.g118450.v5.5:s:6751027-6751180	N3	chromosome_2:6750846-6751027	0.0001	0.0001	0.0001	0.0636	0.0001	0.0278	0.0001	0.0001	0.0001	0.0001	0.0001	0.0001	0.0001	0.0001	0.0001	0.0001	0.0001	0.133	0.0001	0.0001	0.0001	0.0001	0.1812	0.2398	0.0001	0.0001	0.0001
Cre02.g119500.v5.5:s:6859292-6859359	N3	chromosome_2:6858998-6859292	0.0746	0.0892	0.0001	0.0663	0.0167	0.0103	0.2221	0.0382	0.0503	0.0533	0.1476	0.04	0.1155	0.0001	0.0861	0.0246	0.0607	0.0431	0.0094	0.0476	0.0482	0.0108	0.0335	0.0115	0.1061	0.0288	0.0444
Cre02.g120250.v5.5:s:6951593-6951721	N1	chromosome_2:6951241-6951593	0.6132	0.4867	0.5668	0.5512	0.5243	0.5681	0.6383	0.5853	0.5841	0.6184	0.6378	0.5952	0.5689	0.0001	0.3868	0.4909	0.0001	0.4048	0.3549	0.3413	0.2883	0.2633	0.2759	0.3134	0.2577	0.249	0.2232
Cre02.g140941.v5.5:s:8001207-8001270	N6	chromosome_2:8000991-8001207	0.0001	0.0001	0.0001	0.2104	0.0001	0.2848	0.2963	0.1344	0.2177	0.1462	0.2089	0.2206	0.2509	0.1909	0.255	0.149	0.2195	0.2061	0.2329	0.1747	0.3073	0.2759	0.2117	0.1847	0.1835	0.1685	0.1316
Cre02.g141050.v5.5:s:7937044-7937148	N3	chromosome_2:7936602-7937044	0.0001	0.0001	0.0001	0.0342	0.162	0.0071	0.0499	0.0081	0.0104	0.0087	0.0075	0.0155	0.0655	0.008	0.0049	0.0047	0.0316	0.0706	0.0042	0.0331	0.0051	0.0069	0.0037	0.0045	0.0042	0.0103	0.0051
Cre02.g141086.v5.5:s:8166153-8166216	N3	chromosome_2:8165937-8166153	0.0001	0.0001	0.0001	0.0199	0.0001	0.0001	0.0158	0.0154	0.0453	0.0093	0.013	0.0602	0.0397	0.0864	0.01	0.0374	0.0001	0.0119	0.0144	0.0001	0.0138	0.0088	0.0089	0.0085	0.0388	0.0068	0.0153
Cre02.g141086.v5.5:s:8166372-8166670	N3	chromosome_2:8165963-8166524	0.0001	0.0001	0.0001	0.0001	0.0001	0.0001	0.0001	0.0001	0.0001	0.0001	0.1406	0.2052	0.0982	0.0001	0.0001	0.0625	0.0001	0.0001	0.0001	0.0001	0.0001	0.0001	0.0001	0.0735	0.0001	0.1416	0.0001
Cre02.g141250.v5.5:t:7911208-7911290	N3	chromosome_2:7911115-7911240	0.0026	0.0104	0.0056	0.003	0.0101	0.0173	0.0031	0.0021	0.0024	0.002	0.0012	0.0008	0.0235	0.0064	0.0128	0.0235	0.0199	0.0177	0.0146	0.0159	0.0643	0.0237	0.0302	0.0304	0.0021	0.0394	0.0166
Cre02.g141346.v5.5:t:8276146-8276266	N2	chromosome_2:8276093-8276150	0.132	0.1149	0.0769	0.0411	0.0707	0.0535	0.0488	0.0716	0.0763	0.0796	0.0758	0.1278	0.075	0.0718	0.0897	0.0845	0.0826	0.0801	0.0837	0.0799	0.0857	0.0823	0.0688	0.0895	0.1019	0.0717	0.0654
Cre02.g141606.v5.5:s:8423294-8424249	N7	chromosome_2:8423058-8423294	0.0001	0.0001	0.0001	0.3324	0.0001	0.0001	0.0001	0.0001	0.0001	0.0664	0.0001	0.0208	0.0001	0.1783	0.1663	0.0991	0.1113	0.0801	0.0152	0.1228	0.2132	0.1602	0.0629	0.1869	0.0777	0.0637	0.1341
Cre02.g141686.v5.5:s:8450895-8451695	N7	chromosome_2:8450731-8450895	0.0001	0.0001	0.0001	0.1801	0.0001	0.0001	0.0001	0.0001	0.0001	0.0001	0.0001	0.0938	0.0001	0.0001	0.0001	0.2997	0.1134	0.0001	0.1557	0.2045	0.3975	0.0001	0.3485	0.0001	0.0001	0.3945	0.0001
Cre02.g141786.v5.5:t:8479017-8479101	N3	chromosome_2:8478211-8479017	0.0417	0.0001	0.0001	0.0291	0.0001	0.1205	0.0001	0.0415	0.0001	0.0001	0.0001	0.0918	0.0001	0.0001	0.0713	0.047	0.0001	0.0209	0.0159	0.0603	0.013	0.0739	0.022	0.0221	0.0743	0.0388	0.0066
Cre02.g141886.v5.5:t:8534109-8534344	N3	chromosome_2:8533914-8534109	0.0167	0.0001	0.0001	0.1067	0.0001	0.071	0.0001	0.0506	0.0459	0.0001	0.0001	0.0416	0.0087	0.0062	0.0445	0.0069	0.0001	0.0166	0.0135	0.0001	0.0001	0.0001	0.1158	0.0001	0.0001	0.0458	0.0794
Cre02.g141926.v5.5:s:8544196-8544251	N2	chromosome_2:8543377-8544196	0.0001	0.0001	0.0001	0.0001	0.0001	0.0001	0.0001	0.0001	0.3269	0.0001	0.4938	0.1473	0.2754	0.3737	0.3825	0.4726	0.0001	0.0001	0.5545	0.0001	0.3505	0.0001	0.0001	0.0001	0.0001	0.2546	0.4343
Cre02.g141926.v5.5:s:8544427-8544591	N2	chromosome_2:8544251-8544431	0.0001	0.0001	0.0001	0.0001	0.0001	0.0001	0.096	0.0001	0.2376	0.1113	0.2353	0.258	0.2728	0.1512	0.1015	0.1139	0.0001	0.2065	0.1848	0.0001	0.1803	0.1233	0.1547	0.0001	0.0151	0.241	0.069
Cre02.g141946.v5.5:t:8556073-8556200	N3	chromosome_2:8555957-8556073	0.0001	0.0001	0.0001	0.0759	0.0001	0.1147	0.0001	0.0229	0.0455	0.0001	0.0001	0.0451	0.0001	0.0001	0.0001	0.0001	0.0001	0.0001	0.0001	0.0001	0.0001	0.0001	0.0001	0.0001	0.0001	0.0935	0.1731
Cre02.g141966.v5.5:t:8567730-8567939	N3	chromosome_2:8567520-8567730	0.0001	0.0001	0.0001	0.0001	0.0001	0.0001	0.0001	0.0001	0.0001	0.0001	0.0001	0.0001	0.0001	0.0001	0.0001	0.0001	0.0001	0.0001	0.0001	0.0001	0.0001	0.0001	0.0001	0.0001	0.0001	0.4601	0.0001
Cre02.g141966.v5.5:t:8568077-8568213	N3	chromosome_2:8567939-8568077	0.0001	0.0001	0.0001	0.3725	0.0001	0.0001	0.0001	0.0001	0.0001	0.0001	0.0001	0.0303	0.0001	0.0001	0.0001	0.0001	0.0001	0.0001	0.0001	0.0001	0.0001	0.0001	0.0001	0.0001	0.0001	0.3256	0.0001
Cre02.g142066.v5.5:s:8659673-8659836	N3	chromosome_2:8659323-8659686	0.0572	0.0001	0.0001	0.0081	0.0001	0.0117	0.0571	0.0673	0.0126	0.0115	0.0118	0.0056	0.0001	0.0049	0.0973	0.0029	0.0062	0.0042	0.0233	0.0238	0.0297	0.0043	0.0026	0.024	0.0025	0.0016	0.0128
Cre02.g142066.v5.5:t:8659237-8659323	N3	chromosome_2:8659323-8659686	0.1067	0.0001	0.0001	0.0077	0.0001	0.0146	0.0844	0.072	0.0122	0.0115	0.0114	0.0088	0.0001	0.0061	0.09	0.0038	0.0104	0.0059	0.0209	0.027	0.0283	0.0063	0.0032	0.0229	0.0036	0.0019	0.0149
Cre02.g142166.v5.5:s:8681514-8682131	N1	chromosome_2:8681360-8681514	0.0001	0.0001	0.0001	0.5585	0.0001	0.5026	0.4821	0.4832	0.5391	0.5085	0.4613	0.5861	0.5037	0.4333	0.3622	0.4424	0.4481	0.4924	0.4248	0.4315	0.3839	0.5184	0.5066	0.4023	0.4952	0.3684	0.3563
Cre02.g142226.v5.5:s:8704803-8704893	N7	chromosome_2:8704696-8704803	0.1358	0.0001	0.0001	0.0165	0.0001	0.0001	0.0132	0.0125	0.0001	0.0001	0.0001	0.0798	0.0626	0.0515	0.0001	0.0319	0.0001	0.1687	0.0114	0.0464	0.0656	0.1559	0.1094	0.1175	0.1314	0.1036	0.067
Cre02.g142366.v5.5:s:8756570-8756648	N3	chromosome_2:8756274-8756570	0.0001	0.0001	0.0001	0.0001	0.0001	0.0001	0.0001	0.0001	0.0001	0.0395	0.007	0.0553	0.024	0.0265	0.0199	0.0207	0.0497	0.0534	0.0126	0.0177	0.0001	0.0001	0.0001	0.0001	0.0001	0.0001	0.0001
Cre02.g142366.v5.5:s:8757912-8758135	N3	chromosome_2:8757408-8757912	0.0001	0.0001	0.0001	0.0001	0.0001	0.0001	0.0001	0.0001	0.0001	0.0556	0.1241	0.0107	0.0389	0.0172	0.1502	0.0904	0.0001	0.0445	0.0167	0.0001	0.0001	0.0001	0.0001	0.0001	0.0001	0.1173	0.0001
Cre02.g142566.v5.5:s:8831663-8832088	N3	chromosome_2:8831541-8831827	0.0001	0.0001	0.0001	0.0001	0.0001	0.0001	0.0001	0.0001	0.0001	0.0001	0.0001	0.1733	0.0001	0.0167	0.0001	0.1528	0.0001	0.0001	0.0165	0.0001	0.0001	0.0001	0.0001	0.0001	0.0001	0.0001	0.0001
Cre02.g142627.v5.5:s:8851654-8851761	N7	chromosome_2:8850422-8851654	0.237	0.0001	0.0001	0.2986	0.0001	0.0883	0.0001	0.0001	0.0001	0.0001	0.0001	0.0001	0.0001	0.0001	0.0001	0.1592	0.0001	0.0169	0.0001	0.0001	0.0001	0.0001	0.0001	0.1884	0.1407	0.1248	0.0658
Cre02.g142627.v5.5:s:8853270-8853339	N3	chromosome_2:8853204-8853270	0.1269	0.0054	0.0038	0.0614	0.0491	0.031	0.0177	0.0157	0.0054	0.0331	0.0053	0.0167	0.1259	0.0054	0.0395	0.0161	0.0589	0.0337	0.0142	0.0294	0.0746	0.0661	0.0361	0.0759	0.0286	0.0173	0.026
Cre02.g142627.v5.5:s:8854793-8854927	N3	chromosome_2:8853649-8854793	0.0624	0.0001	0.0001	0.1711	0.0001	0.0092	0.0205	0.0108	0.0117	0.0001	0.0001	0.0166	0.0001	0.0001	0.0085	0.0064	0.0001	0.0093	0.0411	0.0001	0.0543	0.008	0.0789	0.0266	0.0244	0.0379	0.0389
Cre02.g142627.v5.5:s:8855751-8855885	N3	chromosome_2:8853649-8855751	0.0834	0.0001	0.0001	0.0176	0.0001	0.0153	0.0001	0.0238	0.0001	0.0001	0.0001	0.0317	0.0001	0.0001	0.1112	0.0444	0.0001	0.0673	0.0299	0.0167	0.0139	0.0152	0.0117	0.0289	0.0354	0.0815	0.0177
Cre02.g142627.v5.5:s:8856709-8856843	N3	chromosome_2:8855565-8856709	0.0001	0.0001	0.0001	0.0001	0.0001	0.0001	0.0001	0.0001	0.0001	0.0001	0.0001	0.0001	0.0001	0.0001	0.0001	0.0001	0.0001	0.0001	0.0001	0.0001	0.0001	0.0001	0.0001	0.0095	0.0001	0.168	0.0001
Cre02.g142627.v5.5:s:8857349-8857483	N3	chromosome_2:8856524-8857349	0.0344	0.0314	0.001	0.0329	0.0373	0.053	0.0378	0.0394	0.0578	0.0519	0.0222	0.0385	0.0468	0.0357	0.0469	0.0317	0.0356	0.0437	0.0267	0.0543	0.0302	0.0431	0.0575	0.0411	0.0356	0.0531	0.0468
Cre02.g142627.v5.5:s:8857668-8857802	N3	chromosome_2:8856524-8857668	0.051	0.0543	0.0061	0.025	0.0099	0.0197	0.0053	0.0039	0.0076	0.0071	0.006	0.0037	0.006	0.0079	0.0221	0.0026	0.0355	0.0023	0.018	0.0206	0.0126	0.0024	0.0017	0.0021	0.0084	0.0132	0.0338
Cre02.g142627.v5.5:s:8858502-8858567	N7	chromosome_2:8858306-8858502	0.0846	0.0001	0.1594	0.0173	0.1068	0.0862	0.0196	0.0667	0.0213	0.0001	0.0001	0.0154	0.0001	0.0001	0.0953	0.2157	0.0001	0.1044	0.2003	0.0688	0.0827	0.147	0.1413	0.0982	0.0665	0.1081	0.0783
Cre02.g142627.v5.5:t:8850288-8850422	N3	chromosome_2:8850422-8851654	0.1191	0.0194	0.0001	0.1167	0.1027	0.0352	0.0629	0.1347	0.1132	0.0001	0.0105	0.0149	0.0563	0.0139	0.0945	0.0618	0.0001	0.0074	0.0087	0.007	0.0533	0.0316	0.0214	0.0554	0.0389	0.0386	0.0401
Cre02.g142627.v5.5:t:8853524-8853649	N3	chromosome_2:8853649-8854793	0.0147	0.0067	0.0052	0.0656	0.0391	0.004	0.0041	0.0033	0.006	0.0063	0.0049	0.0042	0.03	0.0375	0.0041	0.0022	0.0088	0.0025	0.0223	0.0577	0.028	0.0023	0.0334	0.0098	0.0101	0.0157	0.0147
Cre02.g142627.v5.5:t:8855112-8855246	N3	chromosome_2:8855246-8857349	0.1218	0.0088	0.1212	0.0268	0.0001	0.1037	0.067	0.177	0.0692	0.012	0.0476	0.059	0.0693	0.0001	0.0381	0.0545	0.0001	0.0605	0.1068	0.0033	0.1358	0.0477	0.0567	0.0919	0.1143	0.052	0.094
Cre02.g142627.v5.5:t:8856709-8856843	N3	chromosome_2:8856843-8857349	0.108	0.0229	0.0138	0.0064	0.0229	0.0897	0.1326	0.1479	0.0125	0.0001	0.0001	0.055	0.0591	0.0001	0.0521	0.0726	0.0001	0.1085	0.0105	0.0483	0.0243	0.0526	0.0788	0.0511	0.0248	0.0182	0.0454
Cre02.g142627.v5.5:t:8857349-8857483	N2	chromosome_2:8857483-8857987	0.086	0.1646	0.1921	0.1336	0.1132	0.2013	0.1646	0.1923	0.2156	0.1574	0.1734	0.1414	0.1163	0.1415	0.23	0.1134	0.0625	0.1482	0.21	0.2522	0.1452	0.0942	0.146	0.2132	0.2201	0.1787	0.1447
Cre02.g142627.v5.5:t:8858207-8858306	N2	chromosome_2:8858306-8858502	0.0605	0.0276	0.14	0.0094	0.1092	0.0774	0.0167	0.0693	0.0208	0.0653	0.1957	0.0155	0.0788	0.025	0.0809	0.1856	0.0629	0.1148	0.2086	0.044	0.0563	0.152	0.1098	0.0729	0.0546	0.0986	0.0717
Cre02.g143052.v5.5:t:7698477-7699248	N3	chromosome_2:7698233-7698492	0.1892	0.0001	0.0001	0.0001	0.0001	0.0001	0.0001	0.0001	0.0301	0.0001	0.0001	0.0187	0.0001	0.0001	0.0001	0.128	0.0001	0.0631	0.0815	0.0001	0.0001	0.0001	0.0282	0.0001	0.0001	0.0001	0.0001
Cre02.g143087.v5.5:s:9021657-9022245	N3	chromosome_2:9022245-9022739	0.0001	0.0001	0.0001	0.0001	0.0001	0.0001	0.0001	0.0001	0.0001	0.0001	0.0001	0.0001	0.0001	0.0001	0.0001	0.0001	0.0001	0.0001	0.0001	0.0001	0.0001	0.0001	0.3604	0.0001	0.0001	0.0001	0.0001
Cre02.g143087.v5.5:t:9023034-9023798	N7	chromosome_2:9022245-9023427	0.0001	0.0001	0.0001	0.0001	0.0001	0.0001	0.0001	0.0001	0.0001	0.0001	0.0001	0.0001	0.0001	0.0001	0.0001	0.0001	0.0001	0.0001	0.0001	0.0001	0.0001	0.0001	0.41	0.0001	0.0796	0.159	0.0001
Cre02.g143087.v5.5:t:9024125-9024293	N3	chromosome_2:9023550-9024125	0.0001	0.0001	0.0001	0.144	0.0001	0.0001	0.0001	0.0001	0.0001	0.0001	0.0001	0.0001	0.0001	0.0001	0.0001	0.0001	0.0001	0.0001	0.0001	0.0001	0.0001	0.0001	0.0809	0.1612	0.0001	0.0948	0.0757
Cre02.g143227.v5.5:s:9055100-9055864	N7	chromosome_2:9054773-9055348	0.0001	0.0001	0.0001	0.1467	0.0001	0.0001	0.0001	0.0001	0.0001	0.0001	0.0001	0.0001	0.0001	0.0001	0.0001	0.0001	0.0001	0.0001	0.0001	0.0001	0.0001	0.1667	0.125	0.1685	0.0766	0.0783	0.1709
Cre02.g143227.v5.5:s:9056653-9056818	N3	chromosome_2:9056159-9056653	0.0001	0.0001	0.0001	0.0001	0.0001	0.0001	0.0001	0.0001	0.0001	0.0001	0.0001	0.0001	0.0001	0.0001	0.0001	0.0001	0.0001	0.0001	0.0001	0.0001	0.0001	0.0001	0.0001	0.0001	0.0001	0.4112	0.0001
Cre02.g143400.v5.5:s:7634010-7635339	N7	chromosome_2:7633880-7634010	0.1122	0.0001	0.0001	0.176	0.0001	0.0001	0.0001	0.0001	0.0001	0.0001	0.0001	0.01	0.0001	0.0001	0.0001	0.104	0.0001	0.0229	0.0001	0.0001	0.0001	0.0001	0.2709	0.0001	0.2571	0.3564	0.2855
Cre02.g143407.v5.5:t:9120720-9122967	N3	chromosome_2:9120455-9120729	0.0001	0.0001	0.0001	0.0118	0.0267	0.0205	0.0172	0.0161	0.019	0.0253	0.0171	0.0115	0.0239	0.0236	0.0133	0.0815	0.0179	0.0298	0.01	0.0135	0.012	0.0132	0.0081	0.0131	0.0143	0.0072	0.0182
Cre02.g143467.v5.5:t:9141558-9141645	N3	chromosome_2:9141428-9141561	0.0556	0.0606	0.0266	0.0834	0.0143	0.0431	0.0766	0.0765	0.0581	0.0966	0.0456	0.0286	0.0627	0.0357	0.0154	0.0427	0.0551	0.0779	0.0902	0.0495	0.0745	0.0069	0.0493	0.0388	0.0668	0.0597	0.0184
Cre02.g143487.v5.5:s:9146803-9146886	N2	chromosome_2:9146346-9146818	0.1115	0.0634	0.0655	0.1474	0.1574	0.1008	0.0766	0.1052	0.1412	0.0099	0.1449	0.0888	0.0866	0.0901	0.1163	0.1206	0.0314	0.0949	0.0864	0.0753	0.0749	0.0532	0.1706	0.0492	0.0532	0.0858	0.1006
Cre02.g143487.v5.5:s:9147087-9147489	N3	chromosome_2:9146346-9147087	0.0571	0.0459	0.0329	0.0896	0.0901	0.0859	0.0337	0.1153	0.0534	0.0187	0.0988	0.0869	0.1822	0.084	0.0538	0.0321	0.0099	0.0352	0.0801	0.0264	0.0566	0.1364	0.0676	0.0557	0.0258	0.0611	0.1257
Cre02.g143487.v5.5:s:9147821-9147960	N3	chromosome_2:9147632-9147825	0.0237	0.008	0.0199	0.032	0.2124	0.0033	0.0237	0.0036	0.0053	0.0139	0.0065	0.0038	0.0389	0.0059	0.0037	0.0457	0.0055	0.0031	0.0029	0.0204	0.021	0.0023	0.0085	0.0115	0.0019	0.0008	0.0112
Cre02.g143487.v5.5:s:9155212-9155373	N4	chromosome_2:9154227-9155212	0.2441	0.1667	0.4296	0.2837	0.0001	0.4554	0.0001	0.0001	0.0001	0.0001	0.0001	0.0001	0.0001	0.0001	0.0001	0.282	0.0001	0.4426	0.0001	0.0001	0.4378	0.4124	0.3891	0.3576	0.358	0.3715	0.3836
Cre02.g143487.v5.5:s:9157113-9157494	N3	chromosome_2:9156608-9157113	0.0205	0.0001	0.0101	0.0357	0.0154	0.0124	0.0115	0.0092	0.0301	0.0207	0.0001	0.0207	0.0175	0.0751	0.0123	0.0374	0.016	0.0116	0.1396	0.0078	0.0298	0.0226	0.0158	0.0055	0.005	0.0026	0.0055
Cre02.g143487.v5.5:t:9147087-9147489	N3	chromosome_2:9147489-9147653	0.0016	0.0065	0.0267	0.0017	0.0031	0.0037	0.0039	0.0051	0.0048	0.0079	0.0057	0.0028	0.0001	0.0039	0.0062	0.0023	0.0057	0.0781	0.0023	0.0036	0.0025	0.0021	0.0014	0.002	0.0018	0.0114	0.0017
Cre02.g143487.v5.5:t:9154828-9154995	N3	chromosome_2:9154995-9155590	0.0123	0.0258	0.0001	0.0459	0.0001	0.0001	0.0001	0.0001	0.0001	0.0001	0.0001	0.0001	0.0001	0.0001	0.0001	0.0683	0.0001	0.0663	0.0001	0.0001	0.0557	0.0001	0.1029	0.0088	0.0624	0.0388	0.11
Cre02.g143487.v5.5:t:9156521-9156619	N3	chromosome_2:9156608-9157113	0.0158	0.0054	0.0047	0.0263	0.006	0.0038	0.0036	0.0048	0.0065	0.0062	0.0057	0.0063	0.0044	0.0076	0.005	0.0383	0.0063	0.0052	0.1489	0.0047	0.0174	0.0216	0.0137	0.0014	0.0012	0.0009	0.002
Cre02.g143587.v5.5:t:9189945-9190028	N3	chromosome_2:9189560-9189945	0.0626	0.0001	0.0001	0.0204	0.0001	0.0304	0.0001	0.1359	0.0493	0.0133	0.0279	0.0262	0.0787	0.0766	0.0407	0.0278	0.0645	0.0463	0.064	0.0719	0.0592	0.0171	0.0353	0.0117	0.0118	0.0354	0.0143
Cre02.g143800.v5.5:t:7565466-7565534	N3	chromosome_2:7565175-7565466	0.0001	0.0001	0.0001	0.0001	0.0001	0.0001	0.0001	0.0001	0.0001	0.0001	0.0225	0.0229	0.0237	0.0096	0.0139	0.012	0.0001	0.13	0.036	0.0001	0.0392	0.0001	0.0001	0.0001	0.0001	0.0001	0.0001
Cre02.g143800.v5.5:t:7567172-7567241	N3	chromosome_2:7566591-7567172	0.0001	0.0001	0.0001	0.0001	0.0001	0.0001	0.0001	0.0001	0.0001	0.0001	0.0001	0.1344	0.0001	0.1453	0.0001	0.2097	0.0001	0.0001	0.0001	0.0001	0.0001	0.0001	0.0001	0.0001	0.0001	0.0001	0.0001
Cre02.g144100.v5.5:t:7483800-7484852	N3	chromosome_2:7483618-7483919	0.0001	0.0001	0.0001	0.0158	0.0001	0.0193	0.0185	0.0148	0.0167	0.0243	0.0163	0.0904	0.02	0.0001	0.0001	0.0001	0.0001	0.0001	0.0001	0.0001	0.0334	0.0001	0.0192	0.0254	0.0001	0.0139	0.0275
Cre02.g144800.v5.5:t:7381017-7381184	N6	chromosome_2:7380809-7381017	0.2361	0.2605	0.2315	0.1704	0.2315	0.264	0.2868	0.2624	0.2831	0.2769	0.1361	0.2476	0.2702	0.0001	0.2347	0.1822	0.0001	0.2099	0.0001	0.0001	0.0001	0.2349	0.2182	0.0001	0.0001	0.0001	0.2619
Cre02.g144850.v5.5:t:7375727-7375831	N3	chromosome_2:7375321-7375727	0.0505	0.0101	0.0497	0.0333	0.037	0.0046	0.0191	0.034	0.0122	0.0368	0.0497	0.0165	0.0451	0.028	0.0244	0.0347	0.0389	0.0502	0.0238	0.0446	0.0524	0.0566	0.0256	0.0369	0.0277	0.0652	0.0432
Cre02.g144900.v5.5:t:7374630-7375046	N3	chromosome_2:7374478-7374630	0.0001	0.0001	0.0001	0.0144	0.0001	0.0001	0.0517	0.0257	0.0051	0.0074	0.0246	0.0405	0.0471	0.108	0.0081	0.007	0.1111	0.0242	0.0094	0.0104	0.043	0.0127	0.0281	0.0327	0.037	0.0064	0.0811
Cre02.g145600.v5.5:t:7271298-7272116	N7	chromosome_2:7271124-7271307	0.0001	0.0001	0.0001	0.0001	0.0001	0.0001	0.0001	0.0001	0.0001	0.0001	0.0001	0.0001	0.0001	0.0001	0.0001	0.3918	0.0001	0.2515	0.0001	0.0001	0.0001	0.0001	0.3987	0.388	0.0001	0.4575	0.0001
Cre02.g145650.v5.5:t:7255474-7255887	N3	chromosome_2:7255239-7255474	0.0001	0.0001	0.0001	0.0001	0.0001	0.0001	0.0001	0.0001	0.0001	0.0001	0.0001	0.0001	0.0001	0.0001	0.0001	0.0815	0.0001	0.0001	0.0001	0.0001	0.1771	0.0001	0.1844	0.0001	0.0001	0.0001	0.0001
Cre02.g146300.v5.5:s:7183962-7184413	N7	chromosome_2:7183777-7183962	0.0001	0.0001	0.0001	0.252	0.0001	0.0001	0.0001	0.0001	0.0001	0.0001	0.0001	0.0001	0.0001	0.0001	0.0001	0.0001	0.0001	0.0001	0.0001	0.0001	0.0001	0.0001	0.3512	0.0001	0.0001	0.2926	0.2326
Cre02.g146450.v5.5:t:7157908-7158018	N7	chromosome_2:7157796-7157914	0.0001	0.0001	0.0001	0.0001	0.0001	0.0001	0.0001	0.0001	0.0001	0.0001	0.0001	0.0946	0.0001	0.0001	0.0001	0.1063	0.0001	0.1321	0.0237	0.0674	0.1167	0.2101	0.1776	0.2011	0.0831	0.2275	0.2272
Cre02.g146550.v5.5:s:7144896-7145312	N3	chromosome_2:7145312-7145805	0.0111	0.0292	0.0167	0.0235	0.0198	0.0146	0.0145	0.0201	0.0001	0.0001	0.0296	0.0133	0.0162	0.0227	0.0825	0.0279	0.0001	0.0216	0.0446	0.0173	0.0328	0.0429	0.007	0.0549	0.0556	0.0565	0.036
Cre02.g146629.v5.5:t:7131954-7132470	N3	chromosome_2:7131893-7132231	0.0001	0.0001	0.0001	0.0001	0.0001	0.0001	0.1233	0.1019	0.0952	0.1577	0.0128	0.0917	0.0001	0.0793	0.0001	0.0145	0.0001	0.0548	0.0933	0.0137	0.0428	0.0893	0.0511	0.0435	0.1093	0.0505	0.0456
Cre02.g146900.v5.5:s:7098626-7099348	N2	chromosome_2:7098349-7098626	0.0001	0.0001	0.1402	0.2649	0.0001	0.211	0.1656	0.0877	0.2414	0.1623	0.2429	0.1344	0.1374	0.0001	0.0001	0.0001	0.0001	0.4814	0.0001	0.0001	0.0001	0.0001	0.0001	0.0001	0.0001	0.0001	0.0001
Cre02.g147302.v5.5:s:7061744-7062335	N3	chromosome_2:7061743-7062082	0.0253	0.0219	0.0096	0.0169	0.0251	0.0417	0.0212	0.0188	0.0531	0.0052	0.0062	0.0152	0.036	0.0001	0.0194	0.04	0.0375	0.005	0.0271	0.0396	0.0216	0.0371	0.035	0.0675	0.0027	0.0473	0.0314
Cre02.g147700.v5.5:t:7017340-7017502	N3	chromosome_2:7017502-7017676	0.0001	0.0001	0.0001	0.0001	0.0001	0.0001	0.0001	0.0001	0.016	0.1333	0.0757	0.0071	0.1227	0.0361	0.0332	0.0819	0.0001	0.088	0.0874	0.1042	0.0159	0.0871	0.0337	0.0168	0.09	0.0096	0.1059
Cre02.g147900.v5.5:s:6990881-6991014	N2	chromosome_2:6990552-6990881	0.1403	0.1232	0.1296	0.1419	0.1036	0.1385	0.1164	0.1197	0.0982	0.1288	0.1963	0.1607	0.0992	0.0542	0.0926	0.1045	0.0925	0.079	0.1089	0.1096	0.0858	0.1283	0.126	0.1007	0.1041	0.1039	0.1125
Cre02.g147900.v5.5:s:6993238-6993602	N1	chromosome_2:6992543-6993238	0.5315	0.5252	0.5316	0.4609	0.4701	0.4503	0.4599	0.4991	0.3721	0.454	0.4929	0.4928	0.4632	0.0001	0.5792	0.5163	0.425	0.4455	0.4837	0.5805	0.5369	0.5166	0.5007	0.5223	0.5051	0.4206	0.3841
Cre03.g143747.v5.5:s:41841-42418	N3	chromosome_3:41491-41841	0.0377	0.0001	0.0001	0.0671	0.0001	0.0001	0.0001	0.01	0.0001	0.0563	0.0113	0.0216	0.0598	0.0213	0.0001	0.0001	0.0001	0.0001	0.0001	0.0001	0.0001	0.0001	0.069	0.1292	0.0596	0.0076	0.0876
Cre03.g143767.v5.5:s:41841-42418	N3	chromosome_3:41491-41841	0.0383	0.0001	0.0001	0.0666	0.0001	0.0001	0.0001	0.0101	0.0001	0.0563	0.0114	0.0214	0.0598	0.021	0.0001	0.0001	0.0001	0.0001	0.0001	0.0001	0.0001	0.0001	0.0693	0.126	0.0594	0.0075	0.0863
Cre03.g143807.v5.5:t:72906-73767	N3	chromosome_3:72676-72906	0.0001	0.0001	0.0001	0.1398	0.0001	0.0001	0.0001	0.0001	0.0001	0.0001	0.0001	0.0001	0.1141	0.1436	0.1188	0.1081	0.0647	0.1029	0.0466	0.0429	0.0455	0.0787	0.0335	0.0543	0.0681	0.0906	0.0735
Cre03.g143847.v5.5:t:84528-86089	N3	chromosome_3:84282-84648	0.0249	0.0001	0.0001	0.1474	0.0001	0.1592	0.104	0.1656	0.0712	0.0882	0.0423	0.0479	0.1176	0.0486	0.068	0.0803	0.0313	0.014	0.0495	0.0265	0.0238	0.0278	0.0095	0.0217	0.0229	0.0563	0.0185
Cre03.g144011.v5.5:s:120185-120229	N2	chromosome_3:119770-120185	0.0001	0.0001	0.0001	0.3242	0.0001	0.2251	0.1976	0.3949	0.0001	0.0001	0.0001	0.4725	0.0001	0.2159	0.0331	0.1669	0.0001	0.0001	0.0877	0.0289	0.0517	0.0293	0.0142	0.0111	0.0497	0.0588	0.0477
Cre03.g144011.v5.5:s:128445-128508	N7	chromosome_3:128309-128445	0.0001	0.0001	0.0001	0.0001	0.0001	0.2794	0.0001	0.1923	0.0001	0.0001	0.0001	0.1786	0.0001	0.0001	0.0785	0.2931	0.0001	0.0001	0.0001	0.1842	0.2599	0.3593	0.3621	0.1123	0.2216	0.1452	0.0001
Cre03.g144011.v5.5:t:119713-119770	N2	chromosome_3:119770-120185	0.0001	0.0001	0.0001	0.3274	0.0001	0.1964	0.0001	0.0001	0.2528	0.0001	0.0001	0.4586	0.0001	0.2349	0.0332	0.1679	0.0001	0.0802	0.0001	0.0363	0.0558	0.0001	0.0169	0.0153	0.0578	0.0529	0.0679
Cre03.g144144.v5.5:s:156124-156395	N2	chromosome_3:155501-156136	0.1369	0.0001	0.0001	0.2024	0.0001	0.209	0.211	0.25	0.1475	0.0001	0.236	0.0983	0.2418	0.2283	0.0001	0.2687	0.0001	0.0975	0.0001	0.0001	0.3527	0.1003	0.2078	0.1232	0.1856	0.149	0.2025
Cre03.g144144.v5.5:t:155460-155552	N2	chromosome_3:155501-156136	0.1377	0.0001	0.0001	0.2024	0.0001	0.2102	0.212	0.2526	0.1481	0.0001	0.2351	0.0979	0.2438	0.2283	0.0001	0.2704	0.0001	0.0969	0.0001	0.0001	0.3314	0.0985	0.2072	0.1234	0.1845	0.1447	0.2053
Cre03.g144224.v5.5:t:167664-168218	N3	chromosome_3:167389-167664	0.0001	0.0001	0.0001	0.0364	0.1102	0.0967	0.0561	0.0587	0.0123	0.0454	0.0137	0.1117	0.123	0.1187	0.0618	0.0245	0.019	0.0316	0.0378	0.0658	0.0218	0.031	0.0069	0.0073	0.0335	0.0191	0.074
Cre03.g144244.v5.5:s:172176-172656	N3	chromosome_3:172656-172878	0.0001	0.0001	0.0001	0.0001	0.0001	0.0001	0.0001	0.0001	0.0001	0.0001	0.0001	0.0001	0.0001	0.0001	0.0001	0.0001	0.0001	0.0001	0.0001	0.0001	0.0001	0.0001	0.0063	0.0045	0.1698	0.1006	0.0001
Cre03.g144244.v5.5:t:172863-172973	N3	chromosome_3:172656-172878	0.0001	0.0001	0.0001	0.0111	0.0001	0.0001	0.0001	0.0001	0.0001	0.0001	0.0001	0.2642	0.0001	0.0001	0.0001	0.1698	0.0001	0.0643	0.0154	0.0001	0.0501	0.105	0.0063	0.0051	0.1112	0.0615	0.0994
Cre03.g144384.v5.5:s:232958-233043	N3	chromosome_3:232639-232958	0.0287	0.0253	0.0127	0.0114	0.0535	0.0199	0.0286	0.0118	0.0192	0.0263	0.0278	0.0155	0.0292	0.0259	0.015	0.016	0.0027	0.0075	0.0118	0.0111	0.0097	0.01	0.0024	0.0042	0.0262	0.0167	0.0202
Cre03.g144524.v5.5:s:282086-282435	N3	chromosome_3:281865-282086	0.1113	0.0001	0.0001	0.1965	0.0001	0.0001	0.0001	0.0001	0.0001	0.0189	0.0128	0.0086	0.0837	0.0162	0.0839	0.0145	0.0001	0.0001	0.0001	0.0306	0.1232	0.058	0.0375	0.1321	0.0167	0.036	0.0108
Cre03.g144767.v5.5:s:350910-351265	N3	chromosome_3:351265-351520	0.0841	0.1004	0.0214	0.0321	0.0137	0.0274	0.0366	0.0554	0.0303	0.0121	0.016	0.0423	0.0243	0.0238	0.015	0.0091	0.0086	0.0033	0.0196	0.0201	0.0182	0.0067	0.0049	0.0071	0.0092	0.0054	0.0112
Cre03.g144887.v5.5:s:387609-387724	N3	chromosome_3:387313-387609	0.0001	0.0001	0.0001	0.0001	0.0001	0.0001	0.0001	0.0001	0.1119	0.0001	0.0001	0.0278	0.0001	0.0582	0.0119	0.0244	0.0001	0.1018	0.0088	0.0635	0.0081	0.0101	0.0069	0.0066	0.0064	0.0044	0.0097
Cre03.g145007.v5.5:s:443972-444597	N7	chromosome_3:444597-444723	0.0001	0.0001	0.0001	0.0001	0.0001	0.0001	0.0001	0.0001	0.0001	0.0001	0.0001	0.0001	0.0001	0.0001	0.0001	0.4362	0.0001	0.3389	0.0001	0.0001	0.0001	0.0001	0.624	0.0001	0.0001	0.3042	0.0001
Cre03.g145007.v5.5:t:445266-445276	N3	chromosome_3:444784-445266	0.0001	0.0001	0.0001	0.0001	0.0001	0.0001	0.0001	0.0001	0.0001	0.0001	0.0001	0.0001	0.0001	0.0001	0.0001	0.3425	0.0001	0.3206	0.0001	0.0001	0.0001	0.0001	0.0001	0.0001	0.0001	0.1052	0.0001
Cre03.g145027.v5.5:t:449932-450175	N3	chromosome_3:449799-449932	0.0001	0.0001	0.0001	0.0566	0.0288	0.0172	0.0001	0.0838	0.0178	0.0584	0.0208	0.0316	0.0199	0.0652	0.0239	0.0329	0.0263	0.0455	0.018	0.0238	0.0153	0.0463	0.1086	0.0168	0.0173	0.0304	0.0298
Cre03.g145207.v5.5:t:507448-507688	N1	chromosome_3:507688-507832	0.3421	0.309	0.3134	0.3517	0.3486	0.3439	0.3634	0.316	0.3223	0.3297	0.4335	0.3194	0.3354	0.0001	0.3494	0.3047	0.2823	0.3321	0.3107	0.3179	0.318	0.3866	0.3711	0.3125	0.4066	0.3356	0.2737
Cre03.g145307.v5.5:t:531610-532003	N7	chromosome_3:531364-531610	0.7607	0.0001	0.0001	0.0001	0.0001	0.0001	0.0001	0.0001	0.0001	0.0001	0.0001	0.0001	0.0001	0.0001	0.0001	0.0001	0.0001	0.1078	0.0001	0.0001	0.0001	0.0001	0.0001	0.0001	0.0001	0.5424	0.0001
Cre03.g145347.v5.5:s:536620-536763	N3	chromosome_3:536763-536838	0.0835	0.0401	0.0381	0.0549	0.0682	0.0519	0.0804	0.0161	0.0267	0.1464	0.098	0.082	0.0824	0.0001	0.0167	0.0111	0.0276	0.0192	0.1126	0.1133	0.0536	0.0112	0.0684	0.0607	0.0279	0.04	0.0999
Cre03.g145487.v5.5:s:574283-575182	N3	chromosome_3:573880-574283	0.0001	0.0001	0.0001	0.0001	0.0001	0.0001	0.0001	0.0001	0.0001	0.0134	0.0583	0.0175	0.0098	0.0051	0.0052	0.0188	0.0529	0.027	0.0101	0.0155	0.0171	0.029	0.0001	0.0001	0.0001	0.0001	0.0001
Cre03.g145487.v5.5:s:575611-575755	N3	chromosome_3:575403-575611	0.0001	0.0001	0.0001	0.0001	0.0001	0.0001	0.0001	0.0001	0.0001	0.138	0.1244	0.1127	0.0248	0.109	0.0332	0.0396	0.0163	0.051	0.0531	0.0001	0.0001	0.0001	0.0001	0.0001	0.0001	0.0001	0.0001
Cre03.g145807.v5.5:t:644034-644497	N3	chromosome_3:644494-644643	0.0001	0.0001	0.0001	0.0001	0.0001	0.0001	0.0001	0.0001	0.0001	0.0626	0.0637	0.1275	0.0664	0.1459	0.0101	0.0624	0.0001	0.0075	0.0001	0.0001	0.0001	0.0001	0.0001	0.0001	0.0001	0.0001	0.0001
Cre03.g146007.v5.5:t:703241-703410	N7	chromosome_3:703102-703258	0.1336	0.0001	0.0001	0.4139	0.0001	0.0001	0.0001	0.3886	0.0001	0.0001	0.0001	0.4225	0.0001	0.0001	0.0001	0.0001	0.0001	0.0001	0.0001	0.0001	0.0001	0.0001	0.0001	0.3123	0.3718	0.293	0.0001
Cre03.g146067.v5.5:s:723214-723543	N3	chromosome_3:722982-723272	0.0001	0.0001	0.0001	0.0001	0.0001	0.0001	0.0278	0.0186	0.0001	0.0238	0.0001	0.0242	0.0001	0.0211	0.0152	0.0131	0.0001	0.0112	0.0001	0.0001	0.0793	0.0669	0.0665	0.1208	0.1519	0.0453	0.0356
Cre03.g146287.v5.5:s:773031-773097	N3	chromosome_3:772754-773031	0.2032	0.0001	0.0001	0.0001	0.0001	0.0001	0.0001	0.0001	0.0001	0.0001	0.0001	0.0435	0.0001	0.0001	0.0667	0.0613	0.0186	0.0377	0.0277	0.0357	0.0638	0.0096	0.0055	0.0321	0.0688	0.0187	0.0001
Cre03.g146487.v5.5:s:838138-838323	N5	chromosome_3:837514-838138	0.0855	0.0778	0.1346	0.0899	0.1906	0.0982	0.1452	0.0615	0.1223	0.0905	0.0397	0.1058	0.0579	0.1058	0.1866	0.1807	0.2387	0.2275	0.3798	0.3469	0.4099	0.3598	0.4633	0.5257	0.4405	0.5265	0.6772
Cre03.g146487.v5.5:t:836897-837018	N5	chromosome_3:837018-837351	0.2073	0.2133	0.2497	0.199	0.361	0.2447	0.2476	0.2176	0.2295	0.1764	0.165	0.1992	0.2069	0.2082	0.3714	0.3871	0.3156	0.4216	0.5781	0.587	0.6356	0.6487	0.7731	0.7677	0.7753	0.785	0.8226
Cre03.g146627.v5.5:t:887739-887801	N2	chromosome_3:887462-887739	0.0001	0.0001	0.0001	0.0434	0.0001	0.058	0.2139	0.1362	0.0174	0.1784	0.0639	0.0638	0.1121	0.0511	0.0826	0.0687	0.0956	0.0961	0.0668	0.2901	0.1719	0.1902	0.1988	0.0965	0.1535	0.0833	0.0001
Cre03.g146867.v5.5:s:941078-941248	N7	chromosome_3:940808-941078	0.0001	0.0001	0.0001	0.0001	0.0001	0.0001	0.0001	0.0001	0.0001	0.0001	0.0001	0.1821	0.0001	0.1752	0.1975	0.1987	0.1742	0.2291	0.1912	0.1406	0.197	0.1569	0.1632	0.191	0.1852	0.1943	0.119
Cre03.g146867.v5.5:s:941542-941652	N3	chromosome_3:941221-941542	0.0001	0.0001	0.0001	0.0001	0.0001	0.0001	0.0001	0.0001	0.0001	0.0001	0.0001	0.0001	0.0001	0.0125	0.0084	0.0319	0.0001	0.0072	0.0274	0.0496	0.0488	0.0737	0.0628	0.0377	0.0297	0.0373	0.039
Cre03.g148000.v5.5:t:969093-969399	N3	chromosome_3:969004-969099	0.0164	0.0051	0.0127	0.0153	0.0064	0.0041	0.0487	0.0215	0.07	0.0326	0.0026	0.021	0.0079	0.0041	0.021	0.0314	0.0208	0.0153	0.0074	0.0196	0.0142	0.033	0.0157	0.0127	0.0163	0.019	0.0472
Cre03.g148050.v5.5:t:975976-977250	N2	chromosome_3:975812-975976	0.0001	0.0001	0.1406	0.0997	0.1389	0.02	0.1349	0.0492	0.1006	0.0762	0.0707	0.1229	0.199	0.1098	0.0543	0.0618	0.0927	0.1279	0.0527	0.0549	0.0388	0.0269	0.0935	0.0949	0.0678	0.0665	0.1145
Cre03.g148500.v5.5:s:1032746-1032900	N3	chromosome_3:1032900-1033485	0.0258	0.0503	0.0332	0.0102	0.0446	0.0289	0.051	0.023	0.0565	0.0517	0.0285	0.029	0.0325	0.0323	0.0021	0.0158	0.0292	0.0314	0.0383	0.0167	0.0124	0.0001	0.0001	0.0001	0.0001	0.0104	0.0001
Cre03.g148500.v5.5:t:1033485-1034427	N3	chromosome_3:1032900-1033485	0.0322	0.036	0.031	0.0261	0.0399	0.0376	0.0378	0.0223	0.0434	0.051	0.0229	0.0321	0.0339	0.0312	0.004	0.0154	0.0441	0.0214	0.035	0.0455	0.0265	0.0001	0.0336	0.0001	0.0001	0.028	0.0001
Cre03.g148750.v5.5:s:1096959-1097069	N3	chromosome_3:1096708-1096959	0.0001	0.0001	0.0001	0.0001	0.0001	0.0001	0.0001	0.0001	0.0238	0.0451	0.0241	0.003	0.0313	0.0338	0.0308	0.0408	0.1519	0.0033	0.0579	0.0065	0.0744	0.0707	0.0048	0.0111	0.0517	0.0773	0.0924
Cre03.g149250.v5.5:t:1144884-1144973	N3	chromosome_3:1144973-1145108	0.0853	0.0192	0.0627	0.0358	0.0296	0.0521	0.0529	0.0611	0.0742	0.044	0.0499	0.0066	0.0583	0.0173	0.0279	0.0172	0.0001	0.0312	0.0001	0.0001	0.0001	0.2366	0.0455	0.0001	0.0001	0.1005	0.0001
Cre03.g149550.v5.5:s:1195380-1196208	N3	chromosome_3:1195198-1195380	0.0001	0.0001	0.0001	0.0001	0.0001	0.0001	0.0001	0.0001	0.0001	0.0001	0.0001	0.0451	0.0001	0.0001	0.0001	0.1098	0.0001	0.0332	0.0385	0.0001	0.0001	0.0336	0.0001	0.0001	0.0328	0.1193	0.1187
Cre03.g150600.v5.5:s:1322145-1322275	N3	chromosome_3:1322219-1322314	0.0868	0.0001	0.0076	0.0029	0.0109	0.0042	0.0188	0.0036	0.0038	0.0495	0.0049	0.0179	0.0057	0.0101	0.0139	0.004	0.0097	0.0065	0.0061	0.0086	0.0055	0.0049	0.0026	0.0026	0.0025	0.0015	0.0028
Cre03.g150600.v5.5:s:1322396-1322503	N2	chromosome_3:1322503-1322634	0.1167	0.0001	0.0001	0.2165	0.0001	0.2088	0.1457	0.2785	0.1111	0.2138	0.1885	0.134	0.1251	0.0001	0.0001	0.0394	0.0001	0.0151	0.079	0.0195	0.0111	0.0115	0.0856	0.0067	0.006	0.0297	0.0212
Cre03.g150600.v5.5:t:1322796-1323981	N2	chromosome_3:1322664-1322796	0.0754	0.0001	0.0001	0.2255	0.0001	0.2807	0.2704	0.3708	0.1328	0.2408	0.1559	0.1925	0.1771	0.0001	0.0001	0.067	0.0001	0.0154	0.0785	0.0195	0.0113	0.0109	0.0598	0.0067	0.0232	0.0297	0.0052
Cre03.g150700.v5.5:s:1331553-1331626	N3	chromosome_3:1331190-1331553	0.0001	0.0001	0.0001	0.0222	0.0001	0.0095	0.0096	0.0102	0.0066	0.0248	0.0377	0.1447	0.0175	0.0437	0.0429	0.0256	0.0001	0.0228	0.0105	0.0175	0.0001	0.0001	0.0536	0.0001	0.0238	0.0001	0.0001
Cre03.g150900.v5.5:t:1397453-1397618	N3	chromosome_3:1397353-1397457	0.0433	0.0001	0.065	0.0556	0.0837	0.0001	0.0227	0.1282	0.0226	0.0278	0.0266	0.0186	0.0285	0.0336	0.0714	0.1305	0.0001	0.0001	0.0143	0.0654	0.0606	0.0616	0.0549	0.0314	0.0347	0.0174	0.0388
Cre03.g151000.v5.5:t:1403594-1403768	N2	chromosome_3:1403410-1403597	0.0001	0.0001	0.1827	0.1023	0.0001	0.0001	0.0001	0.0001	0.1042	0.1671	0.2228	0.1477	0.1564	0.14	0.1694	0.1535	0.2217	0.1751	0.1683	0.2068	0.1128	0.1533	0.1006	0.1913	0.2178	0.1476	0.1716
Cre03.g151050.v5.5:t:1408946-1409191	N3	chromosome_3:1408859-1408976	0.0001	0.0001	0.0001	0.0001	0.0001	0.0001	0.0001	0.0274	0.0282	0.0065	0.1361	0.0033	0.0001	0.0167	0.0001	0.0061	0.0001	0.0503	0.0097	0.0001	0.009	0.009	0.0522	0.0118	0.116	0.0051	0.0091
Cre03.g151300.v5.5:t:1434908-1434965	N7	chromosome_3:1434965-1435464	0.0001	0.0001	0.0001	0.3289	0.3499	0.0001	0.0001	0.0001	0.0001	0.0001	0.0001	0.0001	0.0001	0.0001	0.0001	0.0001	0.0001	0.0001	0.0001	0.0001	0.0001	0.0001	0.0001	0.0001	0.0001	0.5949	0.0001
Cre03.g151400.v5.5:s:1455168-1455416	N3	chromosome_3:1455416-1455727	0.0001	0.0001	0.0001	0.0001	0.0001	0.0001	0.0001	0.0001	0.0001	0.0001	0.0001	0.4777	0.0001	0.0001	0.0001	0.0001	0.0001	0.0001	0.0001	0.0001	0.0001	0.0001	0.0001	0.0001	0.0001	0.0001	0.0001
Cre03.g151400.v5.5:t:1456508-1456599	N2	chromosome_3:1455416-1456508	0.1293	0.0001	0.0001	0.08	0.0001	0.2366	0.0001	0.2485	0.2286	0.2988	0.2029	0.2288	0.3144	0.2933	0.0001	0.2346	0.0001	0.1702	0.0001	0.0001	0.0001	0.0001	0.0994	0.0001	0.0001	0.0001	0.0001
Cre03.g151500.v5.5:s:1470654-1470704	N3	chromosome_3:1470557-1470654	0.0213	0.0068	0.0072	0.0297	0.0316	0.0388	0.0394	0.0354	0.0322	0.0058	0.0443	0.0598	0.0273	0.042	0.0053	0.0178	0.0118	0.0377	0.0275	0.0084	0.0037	0.0236	0.0315	0.0623	0.0343	0.0109	0.0036
Cre03.g151700.v5.5:t:1491070-1491676	N1	chromosome_3:1490879-1491070	0.6009	0.5063	0.3611	0.4503	0.3398	0.3459	0.4062	0.3986	0.3798	0.3926	0.4126	0.4402	0.4249	0.3406	0.2752	0.2733	0.4767	0.3798	0.3908	0.3901	0.2873	0.489	0.4483	0.3151	0.0001	0.4222	0.0001
Cre03.g152350.v5.5:t:1555487-1555574	N3	chromosome_3:1555336-1555487	0.0001	0.0001	0.0001	0.0001	0.0001	0.0001	0.0001	0.0001	0.0001	0.0001	0.0001	0.3051	0.0001	0.071	0.2059	0.1887	0.0001	0.0098	0.1082	0.0099	0.035	0.052	0.1034	0.1048	0.0321	0.068	0.0001
Cre03.g152650.v5.5:s:1605302-1605956	N3	chromosome_3:1605117-1605302	0.0298	0.0001	0.0001	0.0236	0.0001	0.0001	0.0678	0.0001	0.0332	0.0185	0.0649	0.1497	0.0001	0.0001	0.0001	0.0001	0.0001	0.0001	0.0001	0.0001	0.0001	0.0001	0.0001	0.0001	0.0001	0.0239	0.0001
Cre03.g152650.v5.5:s:1606741-1606782	N3	chromosome_3:1606554-1606741	0.0001	0.0001	0.0001	0.0001	0.0001	0.0001	0.0001	0.0001	0.0001	0.0001	0.0001	0.325	0.0001	0.0001	0.0001	0.0001	0.0001	0.0001	0.0001	0.0001	0.0001	0.0001	0.0001	0.0001	0.0001	0.0001	0.0001
Cre03.g152900.v5.5:t:1631494-1631651	N3	chromosome_3:1631433-1631494	0.0532	0.0069	0.0035	0.0067	0.0028	0.0093	0.0085	0.0215	0.0018	0.0125	0.0028	0.0173	0.0274	0.0096	0.0043	0.0278	0.052	0.0044	0.0258	0.0065	0.0038	0.0037	0.0116	0.0023	0.0029	0.0182	0.003
Cre03.g153000.v5.5:t:1642919-1643093	N3	chromosome_3:1642890-1642985	0.0169	0.0001	0.0001	0.0001	0.0001	0.0001	0.0306	0.0153	0.0185	0.0825	0.0162	0.0961	0.0001	0.0114	0.0129	0.0091	0.0158	0.0282	0.0074	0.0296	0.0076	0.0076	0.0543	0.0072	0.0077	0.0194	0.006
Cre03.g153306.v5.5:t:1700454-1700626	N3	chromosome_3:1700626-1700930	0.0333	0.0303	0.0242	0.0122	0.0001	0.0001	0.0001	0.0001	0.0001	0.0001	0.0177	0.0538	0.0001	0.0001	0.0001	0.0001	0.0001	0.0001	0.0278	0.0001	0.0188	0.0001	0.0749	0.2054	0.0166	0.1524	0.0001
Cre03.g153400.v5.5:s:1714374-1714983	N7	chromosome_3:1713915-1714406	0.0001	0.0001	0.0001	0.0001	0.0001	0.0001	0.0001	0.0001	0.0001	0.0001	0.0001	0.0335	0.0001	0.0001	0.0001	0.1293	0.0001	0.0001	0.0001	0.0001	0.1086	0.0001	0.0607	0.145	0.1084	0.1829	0.129
Cre03.g153400.v5.5:s:1718587-1718761	N3	chromosome_3:1717840-1718587	0.0001	0.0001	0.0001	0.0001	0.0001	0.0001	0.0001	0.0001	0.0001	0.0001	0.0001	0.1406	0.0001	0.0001	0.0001	0.0001	0.0001	0.0001	0.0001	0.0001	0.0001	0.0001	0.2158	0.0001	0.0001	0.2028	0.0001
Cre03.g153550.v5.5:t:1725004-1725044	N3	chromosome_3:1724591-1725004	0.0001	0.0001	0.0001	0.0001	0.0001	0.0001	0.0001	0.0001	0.0303	0.0001	0.0137	0.0097	0.0001	0.0118	0.0089	0.0574	0.0001	0.0086	0.0577	0.0001	0.0001	0.0001	0.1795	0.0001	0.0001	0.0135	0.0001
Cre03.g154100.v5.5:t:1779116-1779241	N3	chromosome_3:1778970-1779121	0.0001	0.0001	0.0001	0.0001	0.0001	0.0001	0.0001	0.0001	0.0001	0.0001	0.0001	0.0185	0.0001	0.0127	0.0138	0.009	0.0001	0.0145	0.01	0.016	0.0001	0.0001	0.1263	0.0151	0.0152	0.0111	0.0001
Cre03.g154700.v5.5:t:1855388-1855469	N3	chromosome_3:1855169-1855394	0.0001	0.0001	0.0001	0.0417	0.0001	0.0001	0.1064	0.0177	0.0186	0.0235	0.0754	0.0165	0.0833	0.0001	0.0265	0.0119	0.0216	0.0085	0.1784	0.0536	0.024	0.0001	0.058	0.0001	0.0001	0.0001	0.0001
Cre03.g154700.v5.5:t:1857849-1857936	N3	chromosome_3:1857700-1857849	0.0001	0.0001	0.0001	0.0305	0.0001	0.1495	0.0096	0.0506	0.1347	0.0336	0.0062	0.0145	0.0408	0.0394	0.0039	0.0108	0.0319	0.0033	0.006	0.006	0.0079	0.0105	0.0057	0.0074	0.0167	0.0551	0.0001
Cre03.g154850.v5.5:s:1874286-1874321	N3	chromosome_3:1874131-1874286	0.0241	0.0109	0.0058	0.0027	0.0132	0.0052	0.0074	0.0751	0.004	0.006	0.0038	0.0127	0.004	0.0045	0.0052	0.0053	0.0113	0.0067	0.0157	0.0001	0.0001	0.0001	0.0103	0.0001	0.0001	0.0001	0.0119
Cre03.g155400.v5.5:t:1934193-1934285	N3	chromosome_3:1934285-1934526	0.0001	0.0207	0.0114	0.0246	0.0109	0.0109	0.0073	0.0048	0.0045	0.0408	0.0417	0.0216	0.0223	0.0251	0.0331	0.0284	0.0667	0.0861	0.0451	0.0461	0.0071	0.0457	0.0195	0.0897	0.0494	0.0796	0.0067
Cre03.g155600.v5.5:s:1950381-1950470	N2	chromosome_3:1950188-1950381	0.0001	0.0001	0.0001	0.1955	0.0001	0.0001	0.3063	0.1657	0.0764	0.1522	0.0598	0.1287	0.2605	0.1409	0.1648	0.1253	0.0211	0.0563	0.0696	0.1128	0.0625	0.225	0.1045	0.162	0.1495	0.0828	0.0786
Cre03.g155700.v5.5:s:1965983-1966124	N3	chromosome_3:1965838-1966012	0.0001	0.0001	0.0001	0.0001	0.0001	0.0001	0.0001	0.0001	0.0001	0.0001	0.1299	0.0753	0.0199	0.0999	0.0376	0.0448	0.0226	0.043	0.023	0.0001	0.0001	0.0001	0.0001	0.0001	0.0001	0.0001	0.0001
Cre03.g155700.v5.5:s:1968496-1968841	N2	chromosome_3:1968410-1968496	0.0001	0.0001	0.0001	0.0001	0.0001	0.0001	0.0001	0.0001	0.0001	0.0001	0.2323	0.292	0.2551	0.1182	0.1726	0.0813	0.0001	0.1735	0.0899	0.0001	0.0001	0.0001	0.0001	0.0001	0.0001	0.0001	0.0001
Cre03.g156200.v5.5:t:2033551-2033772	N4	chromosome_3:2033772-2036406	0.0001	0.0001	0.0001	0.0001	0.0001	0.0001	0.0001	0.0001	0.0001	0.0001	0.0001	0.0001	0.0001	0.0001	0.0001	0.0001	0.0001	0.1416	0.2278	0.0001	0.4232	0.0001	0.5038	0.4119	0.6401	0.4128	0.249
Cre03.g157000.v5.5:t:2113396-2113508	N3	chromosome_3:2113263-2113400	0.0146	0.0001	0.0159	0.023	0.0134	0.0081	0.0073	0.0046	0.0173	0.0054	0.004	0.0024	0.0192	0.0055	0.0256	0.0574	0.0344	0.0065	0.0093	0.014	0.0107	0.0088	0.0049	0.0079	0.0083	0.047	0.0127
Cre03.g157400.v5.5:s:2173651-2173781	N3	chromosome_3:2173397-2173651	0.0215	0.0001	0.0352	0.0467	0.0001	0.0237	0.0263	0.0001	0.0281	0.0001	0.0001	0.1081	0.0001	0.0294	0.0001	0.0166	0.0001	0.0933	0.0219	0.0217	0.086	0.0415	0.0497	0.0112	0.0731	0.0519	0.062
Cre03.g157400.v5.5:s:2176904-2177190	N4	chromosome_3:2176287-2176912	0.2778	0.0001	0.0001	0.4239	0.0001	0.4574	0.2167	0.0001	0.0001	0.0001	0.0001	0.1178	0.0001	0.0844	0.0798	0.1882	0.0001	0.158	0.0259	0.2349	0.1932	0.0858	0.2144	0.3417	0.3427	0.1394	0.226
Cre03.g157400.v5.5:t:2175905-2176033	N3	chromosome_3:2176033-2176288	0.0182	0.0001	0.0001	0.0531	0.0001	0.0212	0.0156	0.0001	0.0001	0.0001	0.0001	0.0138	0.0001	0.0169	0.0093	0.0089	0.0001	0.0658	0.0906	0.0119	0.0962	0.007	0.1583	0.0309	0.0332	0.0028	0.0054
Cre03.g157450.v5.5:t:2184460-2184788	N6	chromosome_3:2184784-2184866	0.2237	0.3529	0.2386	0.2376	0.3215	0.1887	0.2289	0.2373	0.2299	0.2242	0.2042	0.2657	0.2084	0.2545	0.265	0.2928	0.2484	0.2636	0.2577	0.2958	0.2488	0.2524	0.292	0.2476	0.2574	0.2674	0.3301
Cre03.g157900.v5.5:t:2266799-2267320	N3	chromosome_3:2266646-2266799	0.0001	0.0001	0.0001	0.0001	0.0001	0.0001	0.0001	0.0001	0.0001	0.0745	0.0231	0.0181	0.0098	0.044	0.0278	0.019	0.0345	0.0163	0.0119	0.0234	0.0497	0.0185	0.0166	0.0001	0.0001	0.0237	0.0001
Cre03.g158050.v5.5:t:2282542-2282640	N3	chromosome_3:2282388-2282551	0.0016	0.0078	0.0061	0.0029	0.0076	0.0033	0.0045	0.0035	0.0056	0.006	0.0538	0.0022	0.0054	0.0115	0.0057	0.003	0.0102	0.0035	0.0045	0.0062	0.0025	0.0029	0.0022	0.0022	0.0022	0.0014	0.0021
Cre03.g158464.v5.5:t:2339616-2339809	N3	chromosome_3:2339809-2340650	0.0001	0.0001	0.0001	0.0001	0.0001	0.0001	0.0001	0.0001	0.0001	0.0152	0.0133	0.0069	0.0108	0.0234	0.0126	0.0109	0.0192	0.0121	0.0262	0.0001	0.0001	0.0001	0.0001	0.0001	0.1938	0.1118	0.0001
Cre03.g159100.v5.5:s:2416019-2416107	N3	chromosome_3:2416107-2416205	0.0729	0.0427	0.0218	0.0195	0.0001	0.0156	0.0194	0.0157	0.0155	0.0441	0.0501	0.1071	0.0106	0.0187	0.0121	0.0249	0.0161	0.0083	0.015	0.0459	0.0123	0.0121	0.0212	0.0275	0.0318	0.0157	0.0082
Cre03.g159200.v5.5:t:2435447-2435512	N3	chromosome_3:2435061-2435456	0.0129	0.0708	0.0001	0.0082	0.0001	0.0515	0.0168	0.0001	0.0459	0.0134	0.0127	0.0073	0.034	0.0101	0.0104	0.0398	0.0585	0.0799	0.0095	0.0086	0.0234	0.0286	0.0037	0.0198	0.0064	0.003	0.0238
Cre03.g159500.v5.5:t:2465367-2465745	N3	chromosome_3:2465144-2465485	0.0394	0.0025	0.0202	0.0194	0.0048	0.016	0.0681	0.0692	0.0243	0.0182	0.0269	0.0172	0.0128	0.0026	0.0104	0.0334	0.0192	0.0021	0.0018	0.0105	0.0094	0.0219	0.0312	0.0186	0.0111	0.0124	0.0334
Cre03.g159500.v5.5:t:2466191-2466480	N5	chromosome_3:2465701-2466244	0.3052	0.3653	0.2158	0.1914	0.152	0.1471	0.157	0.1703	0.1561	0.2195	0.2197	0.2188	0.2743	0.3237	0.4243	0.5293	0.587	0.5041	0.5337	0.6857	0.7763	0.7648	0.7414	0.8606	0.8645	0.8329	0.6038
Cre03.g159581.v5.5:t:2480339-2481660	N2	chromosome_3:2480093-2480339	0.2552	0.0001	0.334	0.2425	0.0001	0.4282	0.3015	0.0001	0.0001	0.3683	0.3709	0.4247	0.5079	0.0001	0.0001	0.4554	0.0001	0.0001	0.0001	0.0001	0.0001	0.0001	0.0001	0.0001	0.0001	0.0001	0.0001
Cre03.g159851.v5.5:t:2508256-2508399	N3	chromosome_3:2508015-2508256	0.0598	0.0001	0.0001	0.0603	0.0001	0.1401	0.0001	0.0789	0.0713	0.0001	0.0001	0.1597	0.0001	0.0001	0.0001	0.2434	0.0001	0.0001	0.0001	0.0001	0.0001	0.0001	0.0336	0.0001	0.0001	0.1258	0.0001
Cre03.g160200.v5.5:s:2542540-2542782	N1	chromosome_3:2542158-2542540	0.5498	0.5837	0.6786	0.5751	0.6522	0.6115	0.615	0.5901	0.5584	0.5206	0.5671	0.5751	0.5351	0.4922	0.3682	0.3572	0.3157	0.3492	0.3448	0.3123	0.3014	0.2607	0.2924	0.3457	0.346	0.3419	0.3614
Cre03.g160300.v5.5:s:2555304-2555390	N1	chromosome_3:2555390-2555474	0.3271	0.2795	0.3293	0.3485	0.3589	0.3691	0.3216	0.3628	0.3004	0.3855	0.4097	0.3742	0.3801	0.3814	0.4251	0.4289	0.4044	0.4133	0.414	0.4152	0.4485	0.4583	0.4264	0.4175	0.414	0.4634	0.419
Cre03.g160953.v5.5:s:2646735-2646896	N3	chromosome_3:2646399-2646735	0.0001	0.0001	0.0001	0.0001	0.0001	0.0001	0.0001	0.0001	0.0001	0.0001	0.0001	0.1093	0.0001	0.0185	0.0145	0.0487	0.0001	0.0411	0.0249	0.0001	0.0468	0.0249	0.126	0.0749	0.0001	0.1598	0.0001
Cre03.g161000.v5.5:t:2657182-2657255	N3	chromosome_3:2656901-2657182	0.0001	0.0001	0.0001	0.0358	0.0001	0.0001	0.0001	0.079	0.0838	0.0789	0.0161	0.0287	0.0156	0.022	0.0225	0.01	0.0658	0.0126	0.0661	0.0185	0.0538	0.0278	0.0483	0.0207	0.1607	0.1331	0.0651
Cre03.g161000.v5.5:t:2657385-2657542	N3	chromosome_3:2657255-2657460	0.0001	0.0001	0.0001	0.0163	0.0265	0.0001	0.0296	0.0712	0.0157	0.0497	0.0427	0.0219	0.0128	0.0168	0.0432	0.0189	0.0197	0.1234	0.056	0.0218	0.0114	0.0124	0.021	0.0546	0.1061	0.0116	0.0453
Cre03.g161301.v5.5:t:2696082-2696141	N3	chromosome_3:2695696-2696082	0.0001	0.0001	0.0001	0.0001	0.0001	0.0001	0.0001	0.0001	0.0001	0.0001	0.0001	0.1512	0.0001	0.0001	0.0001	0.0001	0.0001	0.0001	0.0001	0.0001	0.0784	0.1499	0.0751	0.1623	0.1017	0.0387	0.0939
Cre03.g161900.v5.5:s:2769228-2769260	N3	chromosome_3:2768750-2769228	0.0901	0.0001	0.0001	0.0773	0.0001	0.0357	0.0001	0.1301	0.0001	0.0001	0.2022	0.0237	0.0001	0.0316	0.0477	0.0318	0.0001	0.0133	0.0138	0.0146	0.0294	0.0104	0.0326	0.0717	0.0076	0.0404	0.0061
Cre03.g162050.v5.5:s:2787916-2788097	N3	chromosome_3:2787800-2787916	0.161	0.0267	0.0357	0.0249	0.0001	0.0217	0.0895	0.0352	0.0059	0.044	0.0108	0.0107	0.015	0.0129	0.0038	0.019	0.0665	0.0142	0.0055	0.0089	0.021	0.0055	0.004	0.0044	0.005	0.0034	0.0269
Cre03.g162550.v5.5:t:2849451-2849605	N3	chromosome_3:2849058-2849451	0.0904	0.0332	0.0045	0.0023	0.0061	0.0039	0.0051	0.015	0.005	0.0049	0.0036	0.0142	0.0169	0.0133	0.0093	0.012	0.01	0.0036	0.0059	0.0066	0.0074	0.0116	0.0167	0.0161	0.0191	0.014	0.0276
Cre03.g164000.v5.5:s:3026168-3026385	N4	chromosome_3:3025720-3026168	0.2675	0.2183	0.2427	0.1455	0.1409	0.1721	0.164	0.137	0.1354	0.1543	0.1355	0.2087	0.1583	0.1873	0.2005	0.2001	0.1986	0.2523	0.2503	0.2701	0.3124	0.316	0.2982	0.3166	0.3678	0.3587	0.3458
Cre03.g164350.v5.5:s:3055710-3055802	N3	chromosome_3:3055448-3055710	0.0473	0.0217	0.0128	0.012	0.0292	0.0258	0.0076	0.0058	0.0057	0.0014	0.0009	0.0045	0.0052	0.0147	0.0141	0.0148	0.0238	0.0346	0.0336	0.0203	0.0966	0.0062	0.0024	0.0469	0.0237	0.039	0.0755
Cre03.g164650.v5.5:s:3090420-3090520	N3	chromosome_3:3090198-3090420	0.0426	0.1766	0.0238	0.015	0.0001	0.0388	0.0001	0.0001	0.0001	0.0216	0.0676	0.0158	0.014	0.0135	0.0365	0.0073	0.0278	0.046	0.0517	0.0585	0.0109	0.0259	0.0476	0.0259	0.0268	0.058	0.0338
Cre03.g164900.v5.5:s:3116225-3116425	N1	chromosome_3:3115773-3116225	0.2905	0.1911	0.2393	0.2918	0.2505	0.3389	0.364	0.2106	0.2402	0.3911	0.2163	0.342	0.1808	0.1485	0.3269	0.3459	0.3525	0.4946	0.322	0.4291	0.4595	0.3991	0.3887	0.46	0.5024	0.3114	0.3515
Cre03.g165150.v5.5:t:3147731-3147948	N3	chromosome_3:3147555-3147768	0.0601	0.0966	0.072	0.0313	0.0084	0.0249	0.1044	0.0533	0.0404	0.0867	0.0422	0.0565	0.0344	0.0001	0.0001	0.004	0.0001	0.0238	0.0067	0.0001	0.0049	0.0054	0.0032	0.0044	0.005	0.0206	0.0052
Cre03.g165200.v5.5:s:3162241-3162996	N3	chromosome_3:3160140-3162241	0.037	0.0001	0.0001	0.0001	0.0001	0.0001	0.0001	0.0001	0.0001	0.0001	0.0001	0.0097	0.0001	0.0388	0.0001	0.0155	0.0276	0.1563	0.0305	0.0001	0.0262	0.0001	0.0477	0.089	0.0001	0.135	0.0001
Cre03.g165200.v5.5:t:3160085-3160140	N3	chromosome_3:3160140-3162241	0.0398	0.0001	0.0001	0.0001	0.0001	0.0001	0.0001	0.0001	0.0001	0.0001	0.0001	0.0256	0.0001	0.0001	0.0001	0.0183	0.0001	0.134	0.0339	0.0001	0.0332	0.0001	0.0459	0.0965	0.1071	0.1439	0.0001
Cre03.g165300.v5.5:s:3189443-3190205	N3	chromosome_3:3189442-3189795	0.0825	0.0001	0.0001	0.0606	0.0302	0.1603	0.0001	0.0207	0.1311	0.0001	0.0001	0.0695	0.0001	0.0476	0.0925	0.0998	0.1462	0.0293	0.0583	0.1772	0.0338	0.1021	0.0578	0.0657	0.0513	0.0665	0.0762
Cre03.g166201.v5.5:s:3303833-3303946	N2	chromosome_3:3303188-3303833	0.0001	0.0001	0.0001	0.0001	0.0001	0.0001	0.0001	0.0001	0.0001	0.2792	0.1197	0.1853	0.2738	0.0835	0.1944	0.1964	0.0001	0.2176	0.2285	0.0001	0.0001	0.0781	0.0935	0.0001	0.0001	0.0001	0.0001
Cre03.g166201.v5.5:s:3304861-3304959	N3	chromosome_3:3304664-3304877	0.0001	0.0001	0.0001	0.0001	0.0001	0.0001	0.0001	0.0001	0.024	0.0117	0.0282	0.0056	0.0737	0.0185	0.0315	0.0326	0.0144	0.0426	0.0214	0.0116	0.0162	0.0161	0.1132	0.0001	0.0001	0.183	0.0001
Cre03.g166201.v5.5:t:3302524-3303188	N2	chromosome_3:3303188-3303833	0.0001	0.0001	0.0001	0.0001	0.0001	0.0001	0.0001	0.0001	0.0001	0.0001	0.1051	0.1179	0.2134	0.0835	0.1421	0.1879	0.2412	0.1729	0.2316	0.175	0.0718	0.0001	0.0792	0.0001	0.0001	0.0001	0.0001
Cre03.g167050.v5.5:s:3418181-3418540	N3	chromosome_3:3418481-3418916	0.0844	0.0001	0.0001	0.0876	0.0001	0.0104	0.0705	0.0447	0.0134	0.0001	0.1975	0.048	0.1014	0.0001	0.0001	0.0722	0.0001	0.0099	0.0132	0.0001	0.0708	0.0608	0.0367	0.0371	0.0097	0.0139	0.0001
Cre03.g167050.v5.5:s:3418916-3419158	N3	chromosome_3:3419158-3419296	0.0001	0.0001	0.0001	0.0001	0.0001	0.0001	0.0001	0.0001	0.0001	0.0001	0.0001	0.0001	0.0001	0.0001	0.0001	0.0001	0.0001	0.0001	0.0001	0.0001	0.0001	0.0001	0.2908	0.0001	0.0001	0.0001	0.0001
Cre03.g167050.v5.5:t:3419296-3419900	N3	chromosome_3:3419158-3419296	0.0001	0.0001	0.0001	0.0001	0.0001	0.0001	0.0001	0.0001	0.0001	0.0001	0.0001	0.0001	0.0001	0.0001	0.0001	0.0001	0.0001	0.0001	0.0001	0.0001	0.0001	0.0001	0.2725	0.0001	0.0001	0.0001	0.0001
Cre03.g167400.v5.5:t:3458444-3458543	N3	chromosome_3:3457992-3458457	0.0027	0.0053	0.0158	0.0072	0.0227	0.0261	0.0051	0.0056	0.0151	0.0104	0.0089	0.0045	0.0106	0.0001	0.0233	0.0234	0.0628	0.0283	0.0604	0.0674	0.0046	0.0199	0.0212	0.0827	0.0449	0.0538	0.0294
Cre03.g167500.v5.5:t:3465947-3466161	N3	chromosome_3:3465855-3465947	0.0091	0.0208	0.01	0.0099	0.0001	0.0132	0.0001	0.0001	0.0168	0.0072	0.0506	0.0018	0.0033	0.0033	0.0033	0.002	0.0079	0.0022	0.0051	0.0054	0.007	0.0059	0.0046	0.0074	0.0139	0.0042	0.0104
Cre03.g167778.v5.5:t:3542160-3542873	N3	chromosome_3:3542019-3542160	0.0001	0.0001	0.0001	0.0001	0.0001	0.0001	0.0001	0.0001	0.0001	0.0001	0.0001	0.1563	0.0001	0.0001	0.0001	0.0001	0.0001	0.0001	0.0001	0.0001	0.0001	0.0001	0.0001	0.0001	0.0001	0.2778	0.0313
Cre03.g168150.v5.5:s:3572493-3572588	N3	chromosome_3:3572261-3572493	0.0508	0.0841	0.0886	0.0482	0.1192	0.0402	0.0381	0.0283	0.0551	0.0942	0.0921	0.0529	0.0528	0.0452	0.0598	0.0667	0.0413	0.0356	0.0134	0.0197	0.0379	0.0176	0.0295	0.0463	0.0222	0.0409	0.0677
Cre03.g168300.v5.5:s:3582539-3582806	N2	chromosome_3:3582806-3582972	0.0001	0.0001	0.0001	0.0001	0.0001	0.0001	0.0001	0.0001	0.0001	0.0001	0.3564	0.5571	0.0001	0.0001	0.279	0.3372	0.0001	0.2452	0.2511	0.0001	0.0001	0.1533	0.1508	0.2451	0.2468	0.1297	0.0001
Cre03.g168300.v5.5:s:3584009-3584442	N4	chromosome_3:3584442-3584543	0.0001	0.0001	0.0001	0.2196	0.0001	0.0001	0.0001	0.2613	0.3621	0.2028	0.1831	0.3114	0.3449	0.4115	0.3857	0.3154	0.2441	0.1776	0.2089	0.2242	0.2562	0.2155	0.2486	0.1209	0.2861	0.2859	0.3935
Cre03.g168300.v5.5:t:3584009-3584442	N6	chromosome_3:3583004-3584009	0.0001	0.0001	0.0001	0.0001	0.0001	0.0001	0.0001	0.0001	0.7942	0.6408	0.4222	0.6372	0.0001	0.5003	0.4247	0.4002	0.0001	0.2947	0.2327	0.0001	0.0001	0.1317	0.2025	0.3593	0.3628	0.1861	0.0001
Cre03.g168350.v5.5:s:3592701-3592762	N3	chromosome_3:3592549-3592701	0.1143	0.0167	0.0001	0.0099	0.0001	0.0001	0.0167	0.0106	0.0001	0.0111	0.0058	0.0033	0.0084	0.0095	0.0096	0.0065	0.0112	0.008	0.0074	0.0061	0.0037	0.0059	0.0026	0.0046	0.0035	0.0031	0.0047
Cre03.g168750.v5.5:s:3637625-3637691	N3	chromosome_3:3637546-3637625	0.0001	0.0001	0.0001	0.0001	0.0001	0.0001	0.0001	0.0001	0.0001	0.0001	0.0192	0.0119	0.0358	0.1431	0.0244	0.0492	0.0168	0.0414	0.012	0.0495	0.0349	0.0168	0.044	0.0106	0.0796	0.0403	0.0156
Cre03.g168750.v5.5:s:3640510-3640626	N3	chromosome_3:3639629-3640510	0.0001	0.0001	0.0001	0.0001	0.0001	0.0332	0.0001	0.0172	0.0001	0.0182	0.0069	0.004	0.0055	0.0063	0.0396	0.0264	0.0213	0.0554	0.0535	0.0537	0.0597	0.0274	0.0215	0.0064	0.0377	0.0504	0.0271
Cre03.g168750.v5.5:s:3641585-3641908	N3	chromosome_3:3641172-3641585	0.0001	0.0001	0.0001	0.0001	0.0001	0.0001	0.0001	0.0001	0.2253	0.1112	0.0097	0.0143	0.024	0.0528	0.0374	0.0462	0.0432	0.0355	0.0479	0.006	0.0287	0.0299	0.0179	0.0335	0.0258	0.0509	0.0638
Cre03.g168750.v5.5:t:3639502-3639629	N3	chromosome_3:3639629-3640510	0.0001	0.0001	0.0001	0.0001	0.0001	0.0001	0.0001	0.0265	0.0185	0.0139	0.0072	0.0038	0.0046	0.0055	0.0214	0.0224	0.0138	0.04	0.0536	0.0474	0.0501	0.0226	0.0145	0.0052	0.0287	0.0453	0.0259
Cre03.g169150.v5.5:t:3678860-3678993	N6	chromosome_3:3678599-3678911	0.255	0.0001	0.0001	0.2321	0.338	0.3655	0.2348	0.3191	0.253	0.2095	0.1496	0.1364	0.2403	0.3266	0.2113	0.2645	0.0001	0.1782	0.2028	0.0001	0.3751	0.1812	0.2461	0.3359	0.2274	0.2148	0.0001
Cre03.g170300.v5.5:t:3794882-3795137	N7	chromosome_3:3794798-3794885	0.0001	0.0001	0.0001	0.0001	0.0001	0.0001	0.0001	0.0001	0.0001	0.0001	0.0001	0.0001	0.0001	0.0001	0.1618	0.1633	0.0001	0.0001	0.3631	0.0001	0.0558	0.0001	0.0001	0.1188	0.0001	0.2311	0.0001
Cre03.g171950.v5.5:s:3993897-3994520	N3	chromosome_3:3993896-3994354	0.0541	0.0278	0.0136	0.0226	0.0091	0.0353	0.0023	0.0113	0.0302	0.0587	0.0455	0.0152	0.0057	0.0001	0.0629	0.0606	0.0001	0.0001	0.0001	0.0176	0.0185	0.0107	0.121	0.0679	0.0532	0.0337	0.0552
Cre03.g172200.v5.5:t:4029698-4029898	N3	chromosome_3:4029233-4029698	0.0118	0.0431	0.0932	0.0345	0.0228	0.0032	0.0169	0.0042	0.0243	0.0044	0.0023	0.0077	0.0028	0.0141	0.0095	0.0069	0.0042	0.0208	0.0026	0.0037	0.0028	0.0033	0.0019	0.0022	0.0029	0.0017	0.0118
Cre03.g172250.v5.5:s:4034840-4034959	N3	chromosome_3:4034655-4034840	0.0357	0.0294	0.012	0.0686	0.0193	0.0442	0.0165	0.0093	0.042	0.0406	0.013	0.0103	0.0121	0.0753	0.0209	0.0321	0.0001	0.0765	0.0218	0.0279	0.056	0.0505	0.0431	0.0163	0.0289	0.0337	0.0233
Cre03.g172400.v5.5:t:4047399-4047904	N7	chromosome_3:4047290-4047399	0.0001	0.0001	0.0001	0.0001	0.0001	0.0001	0.0001	0.0001	0.1398	0.0001	0.0001	0.1192	0.1093	0.1487	0.0249	0.0945	0.0001	0.1241	0.0906	0.0001	0.1137	0.1059	0.173	0.1161	0.2046	0.0861	0.0001
Cre03.g172900.v5.5:s:4094974-4095013	N3	chromosome_3:4095013-4095296	0.0001	0.0001	0.0001	0.0001	0.0001	0.0001	0.0001	0.0253	0.0094	0.0049	0.0119	0.078	0.0069	0.0038	0.0047	0.0037	0.0108	0.0157	0.0049	0.0147	0.0104	0.0047	0.0038	0.0066	0.0066	0.0024	0.021
Cre03.g172950.v5.5:s:4099041-4099127	N7	chromosome_3:4098906-4099041	0.0637	0.0624	0.0674	0.1099	0.0654	0.0754	0.0674	0.0755	0.0555	0.0632	0.0642	0.0679	0.0791	0.0561	0.0727	0.0758	0.0389	0.0835	0.0795	0.0767	0.0862	0.0875	0.0918	0.0628	0.0468	0.093	0.0792
Cre03.g172950.v5.5:t:4097570-4098528	N3	chromosome_3:4098525-4098680	0.0464	0.0471	0.0315	0.0196	0.0503	0.0373	0.0173	0.0434	0.0225	0.0508	0.0344	0.0318	0.038	0.0238	0.0356	0.0338	0.0454	0.0346	0.0333	0.0326	0.0137	0.029	0.0248	0.0364	0.0496	0.03	0.0337
Cre03.g172950.v5.5:t:4098844-4098915	N7	chromosome_3:4098906-4099041	0.0665	0.0659	0.0677	0.1126	0.0688	0.079	0.0681	0.0741	0.0556	0.0633	0.0657	0.0682	0.0772	0.0556	0.0711	0.0824	0.0378	0.0831	0.0805	0.0757	0.0844	0.0928	0.093	0.0696	0.0487	0.0946	0.0817
Cre03.g173300.v5.5:s:4125288-4125372	N3	chromosome_3:4125129-4125288	0.0633	0.0001	0.0001	0.0522	0.0001	0.0505	0.0558	0.0131	0.042	0.1369	0.0456	0.0679	0.0973	0.0344	0.06	0.1144	0.078	0.0493	0.0536	0.01	0.0216	0.0362	0.0714	0.0316	0.0195	0.0336	0.033
Cre03.g173300.v5.5:s:4127505-4127915	N3	chromosome_3:4127410-4127505	0.0649	0.0001	0.0001	0.0154	0.0001	0.099	0.176	0.1683	0.1221	0.0524	0.0062	0.0551	0.1098	0.0059	0.0318	0.0829	0.0353	0.0421	0.0038	0.0047	0.0377	0.0235	0.0535	0.003	0.0387	0.0533	0.02
Cre03.g173350.v5.5:s:4128527-4128722	N6	chromosome_3:4128722-4128981	0.3844	0.2638	0.2273	0.2252	0.2187	0.1903	0.1561	0.1343	0.1203	0.2693	0.2805	0.2862	0.3432	0.2714	0.1171	0.2017	0.2188	0.1159	0.1857	0.1336	0.0992	0.0926	0.1606	0.1282	0.1353	0.179	0.1962
Cre03.g173700.v5.5:s:4167729-4168135	N3	chromosome_3:4167495-4167729	0.0001	0.0001	0.0001	0.0001	0.0001	0.0001	0.0001	0.0001	0.0001	0.0387	0.0415	0.0196	0.1229	0.0174	0.0185	0.0408	0.0311	0.0182	0.0149	0.0001	0.0001	0.0001	0.0001	0.0001	0.0001	0.0419	0.0001
Cre03.g173700.v5.5:t:4167399-4167495	N3	chromosome_3:4167495-4167729	0.0001	0.0001	0.0001	0.0001	0.0001	0.0001	0.0001	0.0001	0.0001	0.0001	0.0446	0.0283	0.1655	0.0147	0.0173	0.0475	0.02	0.0184	0.0153	0.0749	0.0001	0.0001	0.0001	0.0001	0.0001	0.0001	0.0001
Cre03.g174900.v5.5:t:4318492-4320148	N3	chromosome_3:4318373-4318492	0.0001	0.0001	0.0001	0.0001	0.0001	0.0001	0.0001	0.0001	0.0001	0.0242	0.0116	0.1245	0.0077	0.0048	0.0351	0.0294	0.0319	0.0318	0.0061	0.012	0.0101	0.0135	0.0159	0.0553	0.0515	0.0098	0.0001
Cre03.g175100.v5.5:s:4354200-4354292	N3	chromosome_3:4354292-4355182	0.0001	0.0001	0.1395	0.1689	0.0001	0.0794	0.0177	0.0241	0.0001	0.0001	0.0001	0.0001	0.0001	0.0001	0.0001	0.0001	0.0001	0.0001	0.0001	0.0001	0.0001	0.0001	0.0001	0.0001	0.0001	0.0382	0.0001
Cre03.g175100.v5.5:t:4355182-4355240	N3	chromosome_3:4354292-4355182	0.0847	0.1111	0.0001	0.095	0.0175	0.0457	0.0096	0.0124	0.1111	0.0259	0.0001	0.0238	0.0001	0.0303	0.0001	0.0001	0.0001	0.0001	0.0001	0.0001	0.0001	0.0001	0.0001	0.0001	0.0001	0.0167	0.0001
Cre03.g175100.v5.5:t:4356717-4356899	N3	chromosome_3:4356504-4356717	0.0001	0.0001	0.0001	0.3895	0.0001	0.1794	0.2245	0.0001	0.0001	0.0001	0.0001	0.0001	0.0001	0.0001	0.0001	0.0001	0.0001	0.0001	0.0001	0.0001	0.0001	0.0001	0.0001	0.0001	0.0001	0.0001	0.0001
Cre03.g175250.v5.5:t:4368755-4369254	N3	chromosome_3:4368460-4368755	0.0363	0.0622	0.01	0.0349	0.0382	0.0269	0.0275	0.0441	0.0135	0.0249	0.0664	0.0628	0.0328	0.0561	0.0103	0.0213	0.0218	0.01	0.0135	0.0192	0.0291	0.0263	0.0209	0.0001	0.0001	0.0209	0.0234
Cre03.g175400.v5.5:s:4385697-4385748	N1	chromosome_3:4385498-4385697	0.5372	0.3621	0.4343	0.4799	0.4553	0.4224	0.4586	0.4218	0.514	0.4498	0.4831	0.481	0.4125	0.3976	0.4465	0.4565	0.467	0.3668	0.3881	0.4387	0.3594	0.4282	0.3742	0.3332	0.4271	0.3985	0.3543
Cre03.g175850.v5.5:s:4453294-4453500	N3	chromosome_3:4453500-4453843	0.0001	0.0001	0.0001	0.0001	0.0001	0.0001	0.0001	0.1963	0.153	0.1153	0.0852	0.1528	0.1209	0.0382	0.1598	0.0288	0.0001	0.0462	0.0194	0.0001	0.0001	0.0424	0.0897	0.0001	0.0001	0.0209	0.0001
Cre03.g175850.v5.5:t:4453843-4453934	N3	chromosome_3:4453500-4453843	0.0001	0.0001	0.0001	0.1324	0.0001	0.0001	0.0001	0.1588	0.0001	0.1397	0.1283	0.1445	0.1091	0.0404	0.1105	0.0273	0.0001	0.0504	0.013	0.0001	0.0001	0.0176	0.0696	0.0001	0.0001	0.0148	0.0001
Cre03.g176050.v5.5:s:4481434-4481829	N3	chromosome_3:4481210-4481434	0.0054	0.1417	0.0131	0.0059	0.0177	0.0093	0.0082	0.0203	0.0201	0.0328	0.0035	0.0103	0.0133	0.016	0.0181	0.0126	0.0066	0.0037	0.0052	0.0061	0.0054	0.0064	0.0032	0.0047	0.0151	0.0027	0.0172
Cre03.g176325.v5.5:t:4505370-4507889	N3	chromosome_3:4505149-4505370	0.0596	0.062	0.0399	0.1083	0.0192	0.031	0.0455	0.0328	0.0839	0.0193	0.0489	0.0288	0.0394	0.0683	0.0452	0.0303	0.0001	0.041	0.0565	0.0001	0.0294	0.0714	0.0242	0.0192	0.0487	0.0105	0.0062
Cre03.g176350.v5.5:t:4509058-4509188	N3	chromosome_3:4508789-4509058	0.3688	0.2432	0.2893	0.2632	0.2784	0.3803	0.3678	0.2077	0.0001	0.0001	0.0001	0.0001	0.0001	0.0001	0.0001	0.0001	0.0001	0.0001	0.0001	0.0001	0.0001	0.0001	0.0001	0.0001	0.0001	0.0001	0.0001
Cre03.g176866.v5.5:t:4572423-4572912	N3	chromosome_3:4572912-4573156	0.0001	0.0001	0.0001	0.0001	0.0001	0.0001	0.0001	0.0001	0.0001	0.0001	0.0001	0.0001	0.0001	0.0185	0.0153	0.1638	0.0001	0.0001	0.0001	0.0001	0.0159	0.0001	0.0635	0.046	0.0417	0.1285	0.0001
Cre03.g177200.v5.5:t:4621718-4621963	N2	chromosome_3:4621291-4621721	0.1292	0.1126	0.1209	0.1211	0.1208	0.0878	0.1103	0.0377	0.0559	0.105	0.1095	0.1316	0.0772	0.0731	0.1394	0.0276	0.0628	0.0866	0.0617	0.0897	0.0706	0.0427	0.0698	0.1071	0.0604	0.1173	0.1023
Cre03.g178300.v5.5:s:4774451-4774525	N6	chromosome_3:4774525-4774601	0.1794	0.1833	0.2632	0.2289	0.3568	0.2746	0.1806	0.2311	0.1357	0.1249	0.1099	0.0783	0.1918	0.2032	0.1007	0.2013	0.1485	0.1394	0.1718	0.1079	0.1332	0.1367	0.1174	0.1597	0.2036	0.1253	0.2325
Cre03.g178300.v5.5:t:4775040-4776386	N6	chromosome_3:4774755-4775040	0.2933	0.271	0.3364	0.3233	0.3779	0.4196	0.386	0.3186	0.1915	0.1645	0.1373	0.1668	0.2166	0.1347	0.1497	0.2538	0.2431	0.1674	0.2736	0.1538	0.1657	0.1718	0.1562	0.2041	0.291	0.202	0.3041
Cre03.g179250.v5.5:t:4860349-4860396	N3	chromosome_3:4860222-4860349	0.1719	0.028	0.0146	0.0098	0.0306	0.0138	0.0001	0.0077	0.0139	0.0444	0.0147	0.0471	0.0111	0.008	0.0088	0.0066	0.0124	0.0195	0.0073	0.0105	0.0123	0.0127	0.025	0.0078	0.0306	0.0592	0.0129
Cre03.g179400.v5.5:s:4887400-4887688	N2	chromosome_3:4887265-4887420	0.0001	0.0001	0.0001	0.0001	0.0001	0.0001	0.0001	0.0001	0.0001	0.203	0.1786	0.0482	0.1309	0.1382	0.304	0.0779	0.0001	0.3096	0.2398	0.1396	0.1497	0.2039	0.1672	0.1849	0.0001	0.2578	0.0001
Cre03.g179820.v5.5:t:4921423-4921559	N3	chromosome_3:4921559-4921756	0.0001	0.0001	0.0001	0.0001	0.0001	0.0001	0.0001	0.0001	0.0001	0.0001	0.0001	0.0001	0.0001	0.0001	0.0001	0.1703	0.0001	0.0001	0.0001	0.0001	0.0001	0.0001	0.2902	0.0001	0.0001	0.0001	0.0001
Cre03.g179840.v5.5:s:4924305-4924340	N4	chromosome_3:4924150-4924305	0.0001	0.0001	0.0001	0.0001	0.0001	0.0001	0.0001	0.0001	0.0665	0.0001	0.0001	0.0863	0.1683	0.2183	0.1789	0.1929	0.2643	0.2663	0.2605	0.1882	0.183	0.1605	0.186	0.1765	0.2926	0.229	0.2599
Cre03.g179840.v5.5:s:4924815-4925130	N3	chromosome_3:4924340-4924815	0.0001	0.0001	0.0001	0.0001	0.0001	0.0001	0.0001	0.0001	0.0001	0.0001	0.0001	0.0001	0.0001	0.0001	0.3402	0.2642	0.0001	0.2089	0.1742	0.0001	0.0001	0.0001	0.0001	0.0001	0.0001	0.0001	0.0001
Cre03.g179840.v5.5:t:4924305-4924340	N3	chromosome_3:4924340-4924815	0.0001	0.0001	0.0001	0.0001	0.0001	0.0001	0.1099	0.0001	0.0097	0.0126	0.0444	0.0044	0.0342	0.0231	0.0521	0.0423	0.0308	0.0288	0.0284	0.0288	0.0833	0.0821	0.0307	0.0224	0.0261	0.0616	0.0071
Cre03.g180550.v5.5:t:5014519-5014623	N3	chromosome_3:5014464-5014519	0.0001	0.0001	0.0001	0.0001	0.0001	0.0001	0.0001	0.0001	0.0001	0.0167	0.0115	0.0774	0.009	0.0105	0.0109	0.0394	0.0165	0.0001	0.0471	0.0001	0.0001	0.0001	0.0116	0.022	0.0175	0.0001	0.0001
Cre03.g180600.v5.5:s:5017175-5017210	N7	chromosome_3:5017210-5017391	0.0095	0.0255	0.0223	0.0188	0.0001	0.0001	0.0745	0.0159	0.0394	0.1217	0.0098	0.0073	0.0404	0.0556	0.0001	0.0976	0.0001	0.1004	0.1163	0.0676	0.1674	0.1169	0.0921	0.0001	0.1884	0.0808	0.2333
Cre03.g180600.v5.5:t:5017695-5017752	N3	chromosome_3:5017440-5017695	0.067	0.0001	0.0303	0.0534	0.0001	0.0001	0.0001	0.0385	0.0628	0.0501	0.0085	0.025	0.0315	0.0118	0.2423	0.0363	0.0001	0.0476	0.1236	0.0001	0.0001	0.0607	0.0277	0.0001	0.1335	0.1804	0.0902
Cre03.g180650.v5.5:s:5024636-5024744	N3	chromosome_3:5024554-5024636	0.0618	0.0216	0.0132	0.0057	0.0001	0.0073	0.0119	0.0133	0.0108	0.0071	0.0051	0.1076	0.0044	0.0069	0.0284	0.0057	0.0001	0.0081	0.033	0.0139	0.0097	0.0109	0.0324	0.0093	0.0352	0.0212	0.0099
Cre03.g181250.v5.5:s:5084661-5084788	N3	chromosome_3:5084788-5085389	0.0216	0.0209	0.0106	0.003	0.1052	0.0043	0.0054	0.0044	0.0068	0.0153	0.0179	0.0108	0.0216	0.0455	0.0001	0.0001	0.0001	0.0001	0.0001	0.0001	0.0001	0.0001	0.0001	0.0001	0.0001	0.0001	0.0001
Cre03.g181250.v5.5:t:5085389-5086252	N3	chromosome_3:5084788-5085389	0.0129	0.0142	0.0073	0.0022	0.0506	0.0029	0.0034	0.0029	0.0041	0.0102	0.0118	0.0089	0.0137	0.025	0.0001	0.0237	0.0001	0.0321	0.0001	0.0001	0.0001	0.0001	0.0001	0.0001	0.0001	0.0001	0.0263
Cre03.g182050.v5.5:s:5144211-5144302	N3	chromosome_3:5143531-5144211	0.0064	0.1234	0.018	0.0438	0.0152	0.0229	0.0207	0.0226	0.029	0.0211	0.0191	0.0023	0.0122	0.0115	0.0036	0.0245	0.0186	0.0458	0.0431	0.0171	0.0456	0.032	0.0393	0.0405	0.063	0.0317	0.048
Cre03.g182150.v5.5:s:5153570-5153816	N2	chromosome_3:5153816-5154954	0.0488	0.0512	0.0695	0.0941	0.0876	0.1025	0.1109	0.1234	0.117	0.09	0.0964	0.1078	0.1013	0.1637	0.1611	0.107	0.0697	0.0525	0.069	0.0449	0.0471	0.0237	0.0575	0.0315	0.0254	0.0347	0.0545
Cre03.g182650.v5.5:t:5203406-5203967	N3	chromosome_3:5203332-5203406	0.03	0.0424	0.0227	0.0119	0.029	0.0185	0.0281	0.0131	0.0292	0.0199	0.0184	0.0127	0.0143	0.0156	0.0146	0.0092	0.0295	0.1137	0.0159	0.0116	0.0143	0.014	0.01	0.0125	0.0483	0.0189	0.0112
Cre03.g183350.v5.5:t:5268757-5269011	N2	chromosome_3:5268522-5268757	0.0001	0.0001	0.0001	0.0001	0.0001	0.0001	0.0001	0.0001	0.0001	0.1948	0.1283	0.1678	0.2291	0.1281	0.1042	0.1466	0.0001	0.0891	0.1805	0.08	0.0001	0.0001	0.0001	0.0001	0.0001	0.0001	0.0001
Cre03.g183451.v5.5:s:5278096-5278157	N7	chromosome_3:5277931-5278096	0.0001	0.0001	0.0001	0.0001	0.0001	0.0001	0.0001	0.0001	0.0001	0.0001	0.0001	0.0001	0.0001	0.0001	0.0001	0.4261	0.0001	0.0001	0.4691	0.0001	0.3667	0.0001	0.2827	0.254	0.0001	0.3129	0.0001
Cre03.g183500.v5.5:s:5281938-5282007	N3	chromosome_3:5281750-5281938	0.0469	0.0064	0.0178	0.0192	0.0626	0.0466	0.0001	0.0001	0.0062	0.0308	0.0848	0.052	0.0663	0.0511	0.0243	0.0282	0.0362	0.0528	0.0287	0.0285	0.0167	0.002	0.0157	0.0149	0.0305	0.019	0.0126
Cre03.g184000.v5.5:s:5337149-5337343	N3	chromosome_3:5336819-5337156	0.0537	0.0133	0.0431	0.0392	0.0001	0.0084	0.0001	0.0114	0.0127	0.0321	0.0057	0.0729	0.0357	0.0468	0.0501	0.0032	0.0553	0.0285	0.105	0.0422	0.0676	0.0436	0.0295	0.0199	0.0841	0.0096	0.0462
Cre03.g184100.v5.5:s:5342723-5343048	N3	chromosome_3:5342573-5342723	0.0001	0.0001	0.0001	0.0001	0.0001	0.0001	0.0001	0.0001	0.0001	0.0001	0.0001	0.098	0.0001	0.0001	0.0001	0.1613	0.0001	0.075	0.0001	0.0001	0.0001	0.0001	0.0001	0.0001	0.0001	0.0001	0.0001
Cre03.g184350.v5.5:s:5359351-5360329	N3	chromosome_3:5360329-5360501	0.2167	0.0001	0.0001	0.122	0.0001	0.0001	0.0001	0.0001	0.023	0.0001	0.0257	0.1244	0.1022	0.0001	0.0001	0.0532	0.0001	0.1013	0.0001	0.1692	0.0001	0.0001	0.1438	0.0001	0.0967	0.0869	0.0001
Cre03.g184651.v5.5:s:5391843-5392015	N3	chromosome_3:5391701-5391843	0.0001	0.0001	0.0001	0.0184	0.0001	0.0487	0.0122	0.069	0.049	0.124	0.1471	0.0603	0.059	0.0297	0.0083	0.0758	0.0439	0.0581	0.0582	0.0672	0.0187	0.0847	0.0301	0.0964	0.0123	0.042	0.0161
Cre03.g184651.v5.5:s:5392284-5392380	N3	chromosome_3:5392015-5392284	0.0001	0.0001	0.0001	0.1676	0.0197	0.1167	0.1339	0.0632	0.0819	0.0549	0.0386	0.0905	0.0309	0.076	0.0158	0.0333	0.0383	0.0191	0.0174	0.0109	0.0095	0.0358	0.0316	0.0295	0.0056	0.0481	0.0119
Cre03.g184850.v5.5:t:5404847-5405016	N3	chromosome_3:5404680-5404914	0.0459	0.0001	0.0001	0.071	0.0001	0.0186	0.0207	0.0887	0.0083	0.0119	0.0089	0.0046	0.0083	0.0075	0.0071	0.0044	0.0097	0.0076	0.0269	0.0394	0.0124	0.0121	0.0267	0.0122	0.0125	0.0212	0.0102
Cre03.g185100.v5.5:s:5435103-5435192	N3	chromosome_3:5435023-5435103	0.0101	0.0236	0.0262	0.01	0.0208	0.0151	0.0125	0.0077	0.008	0.0201	0.0271	0.0506	0.0056	0.0435	0.0106	0.0206	0.0151	0.0095	0.0159	0.0288	0.0558	0.0001	0.0219	0.0192	0.0001	0.0001	0.0001
Cre03.g186100.v5.5:s:5530661-5530806	N3	chromosome_3:5530476-5530755	0.0893	0.0217	0.0556	0.0136	0.0001	0.0239	0.0001	0.0001	0.0195	0.0557	0.0287	0.0727	0.0193	0.0206	0.0001	0.0685	0.0239	0.1814	0.0652	0.1096	0.0741	0.0853	0.0114	0.0352	0.0946	0.0318	0.065
Cre03.g186400.v5.5:s:5553218-5553303	N7	chromosome_3:5553063-5553218	0.2678	0.0001	0.0001	0.3255	0.0001	0.2324	0.0001	0.0001	0.0001	0.0001	0.0001	0.1911	0.0001	0.0001	0.0001	0.1412	0.0001	0.0001	0.0001	0.0001	0.1506	0.0775	0.0579	0.2018	0.1755	0.1034	0.2038
Cre03.g186650.v5.5:t:5575702-5575820	N3	chromosome_3:5575639-5575757	0.1018	0.1207	0.0719	0.0658	0.0001	0.0699	0.0001	0.1033	0.0001	0.0194	0.0827	0.146	0.1071	0.0429	0.0071	0.037	0.0272	0.0378	0.0207	0.0296	0.0066	0.0072	0.0272	0.0344	0.0384	0.0587	0.0213
Cre03.g187350.v5.5:s:5643723-5643973	N3	chromosome_3:5643545-5643723	0.0001	0.0001	0.0001	0.0001	0.0001	0.0001	0.0001	0.0001	0.0001	0.0001	0.1007	0.0248	0.0338	0.0001	0.0001	0.1249	0.0001	0.0158	0.0001	0.0001	0.0217	0.0001	0.0727	0.0238	0.0845	0.0265	0.0001
Cre03.g187500.v5.5:s:5662818-5663354	N6	chromosome_3:5663354-5663589	0.1827	0.2496	0.205	0.2575	0.2286	0.275	0.2245	0.3234	0.1867	0.196	0.2036	0.1881	0.2728	0.1618	0.131	0.1484	0.1882	0.1856	0.1599	0.1509	0.1492	0.2026	0.1811	0.1536	0.1945	0.1409	0.1652
Cre03.g187550.v5.5:t:5667909-5668000	N4	chromosome_3:5667571-5667909	0.0417	0.0001	0.0001	0.1404	0.0001	0.2047	0.0001	0.0001	0.1938	0.0001	0.3295	0.1227	0.1085	0.1729	0.2769	0.2521	0.0001	0.0001	0.42	0.0001	0.2504	0.0001	0.2518	0.2338	0.2436	0.2874	0.3344
Cre03.g188200.v5.5:s:5737481-5737876	N3	chromosome_3:5737876-5738119	0.0541	0.0301	0.0072	0.0852	0.0001	0.05	0.0105	0.0001	0.0362	0.0455	0.0473	0.09	0.0027	0.0059	0.0121	0.0423	0.0554	0.0651	0.0419	0.0299	0.0291	0.0256	0.0153	0.0219	0.0246	0.0373	0.0075
Cre03.g188300.v5.5:t:5748871-5749055	N3	chromosome_3:5748733-5748871	0.011	0.0207	0.0123	0.0064	0.0263	0.014	0.0097	0.0085	0.0112	0.0149	0.0079	0.0656	0.0087	0.0118	0.0139	0.0125	0.026	0.0129	0.0226	0.0172	0.0178	0.0206	0.0267	0.012	0.0167	0.0074	0.0106
Cre03.g188400.v5.5:t:5756899-5757065	N3	chromosome_3:5756770-5756899	0.0001	0.0001	0.0001	0.0001	0.0001	0.0001	0.0001	0.0238	0.0617	0.1004	0.0571	0.0379	0.1373	0.0608	0.0758	0.0377	0.0001	0.0095	0.0547	0.1255	0.0351	0.0126	0.0288	0.0514	0.0131	0.0133	0.035
Cre03.g188500.v5.5:t:5763326-5764207	N3	chromosome_3:5763168-5763326	0.0067	0.0001	0.0001	0.0107	0.0186	0.0141	0.0133	0.0855	0.0122	0.0092	0.0064	0.0047	0.0072	0.006	0.0049	0.0031	0.0081	0.0035	0.0061	0.0074	0.0068	0.0063	0.0047	0.0076	0.0051	0.0042	0.0081
Cre03.g189150.v5.5:t:5820064-5821274	N3	chromosome_3:5819911-5820064	0.0001	0.0001	0.0001	0.0001	0.0001	0.2652	0.0001	0.0001	0.0001	0.0001	0.0001	0.0257	0.0001	0.0295	0.0001	0.0334	0.0001	0.0291	0.0001	0.0001	0.0001	0.0001	0.0001	0.0001	0.0001	0.0001	0.0001
Cre03.g189700.v5.5:t:5882278-5882418	N3	chromosome_3:5882418-5882772	0.0108	0.0167	0.0107	0.0138	0.0165	0.0077	0.0074	0.0282	0.0097	0.0093	0.0066	0.0137	0.0052	0.0044	0.023	0.0174	0.0425	0.0109	0.056	0.0381	0.0185	0.0578	0.0409	0.0355	0.0507	0.0437	0.0037
Cre03.g190150.v5.5:t:5926286-5926447	N6	chromosome_3:5926171-5926286	0.2453	0.3677	0.3935	0.3051	0.305	0.2584	0.2302	0.3092	0.3074	0.3875	0.2517	0.2221	0.2795	0.3386	0.2969	0.2582	0.2583	0.2237	0.3302	0.3704	0.2348	0.2643	0.2946	0.2984	0.2802	0.3397	0.3721
Cre03.g190281.v5.5:s:5948119-5948272	N3	chromosome_3:5946990-5948231	0.3096	0.0001	0.0001	0.1511	0.0001	0.0001	0.0983	0.06	0.057	0.0001	0.1408	0.1654	0.0694	0.0001	0.0001	0.0468	0.0001	0.0097	0.0001	0.0138	0.0001	0.0001	0.0432	0.067	0.1068	0.0497	0.0001
Cre03.g190281.v5.5:t:5946191-5946614	N3	chromosome_3:5946614-5946962	0.3552	0.0001	0.0001	0.0399	0.0001	0.0001	0.1027	0.1511	0.0608	0.0001	0.1206	0.1418	0.1235	0.0001	0.0001	0.1153	0.0001	0.0494	0.0001	0.0705	0.0001	0.0001	0.0784	0.0189	0.1113	0.0899	0.0001
Cre03.g190400.v5.5:s:5961445-5961486	N3	chromosome_3:5961486-5962727	0.0587	0.046	0.0336	0.0187	0.0039	0.0256	0.0124	0.0274	0.024	0.0328	0.0204	0.0171	0.0116	0.0191	0.0053	0.0087	0.0132	0.001	0.0124	0.0148	0.0061	0.0123	0.0154	0.0065	0.0064	0.0035	0.0012
Cre03.g190400.v5.5:t:5963103-5963444	N3	chromosome_3:5962755-5963103	0.0742	0.0693	0.0272	0.0318	0.0208	0.0189	0.0328	0.0279	0.0179	0.024	0.0261	0.0268	0.0214	0.0137	0.0057	0.0062	0.0142	0.0051	0.0125	0.0108	0.0066	0.0178	0.0127	0.0121	0.0066	0.0039	0.0154
Cre03.g190500.v5.5:s:5976804-5976996	N3	chromosome_3:5976400-5976804	0.0547	0.0315	0.0499	0.0282	0.0606	0.0286	0.0272	0.0182	0.0239	0.0265	0.022	0.0506	0.043	0.0325	0.0259	0.0284	0.0282	0.0215	0.0195	0.0088	0.0071	0.0091	0.0421	0.0284	0.0421	0.0382	0.0088
Cre03.g190900.v5.5:s:6016077-6016337	N3	chromosome_3:6015810-6016077	0.0001	0.0001	0.0001	0.0001	0.0001	0.0001	0.0001	0.0001	0.0001	0.0001	0.025	0.2307	0.0001	0.0001	0.0238	0.0252	0.0001	0.021	0.0361	0.0001	0.0001	0.0385	0.027	0.0001	0.0001	0.0198	0.0001
Cre03.g191300.v5.5:t:6048903-6050818	N3	chromosome_3:6048756-6048952	0.1147	0.0001	0.0847	0.0073	0.0133	0.0377	0.0289	0.0163	0.1148	0.0532	0.1149	0.0507	0.0921	0.0493	0.038	0.021	0.0052	0.0338	0.0156	0.0172	0.0177	0.0057	0.0132	0.0089	0.0157	0.014	0.0074
Cre03.g191350.v5.5:s:6052333-6052460	N3	chromosome_3:6052130-6052399	0.0001	0.0001	0.0001	0.0001	0.0001	0.0001	0.0001	0.0001	0.0001	0.0001	0.1583	0.1276	0.0001	0.1955	0.0576	0.2387	0.0001	0.0109	0.0227	0.0001	0.0708	0.0001	0.0242	0.0001	0.0282	0.1106	0.0001
Cre03.g191850.v5.5:t:6130061-6130148	N3	chromosome_3:6129844-6130095	0.0618	0.0848	0.1272	0.0308	0.1229	0.0338	0.0389	0.0486	0.0698	0.0672	0.0029	0.0138	0.0194	0.0154	0.0266	0.0348	0.0209	0.0267	0.0188	0.0049	0.0954	0.0292	0.0545	0.0937	0.0428	0.0547	0.0469
Cre03.g193000.v5.5:s:6287314-6287474	N3	chromosome_3:6286666-6287314	0.0657	0.0523	0.0124	0.0206	0.0191	0.0595	0.0623	0.0662	0.0535	0.0348	0.0066	0.0129	0.0265	0.0001	0.0755	0.014	0.0279	0.0334	0.134	0.0001	0.0001	0.0001	0.0632	0.0001	0.0001	0.0455	0.0001
Cre03.g193000.v5.5:t:6286559-6286666	N3	chromosome_3:6286666-6287314	0.0757	0.0383	0.0178	0.0202	0.0251	0.0743	0.0622	0.0534	0.0553	0.0488	0.0077	0.0127	0.0188	0.0001	0.0503	0.009	0.0228	0.0254	0.1171	0.0718	0.0001	0.024	0.0635	0.0933	0.0001	0.0001	0.0001
Cre03.g193600.v5.5:t:6335330-6335432	N2	chromosome_3:6335432-6336591	0.4245	0.0001	0.0001	0.0001	0.0001	0.0001	0.0001	0.0001	0.0001	0.0001	0.7917	0.5743	0.0001	0.0001	0.0001	0.2662	0.0001	0.0001	0.0001	0.0001	0.0001	0.0001	0.1942	0.1558	0.2452	0.2797	0.1279
Cre03.g194150.v5.5:t:6391292-6391764	N1	chromosome_3:6391134-6391292	0.4696	0.4302	0.3443	0.3387	0.2933	0.2354	0.0001	0.3929	0.2329	0.4201	0.3075	0.2841	0.2203	0.3427	0.5014	0.4765	0.5372	0.4554	0.4748	0.4363	0.6181	0.3438	0.4581	0.4922	0.5529	0.3908	0.6149
Cre03.g194535.v5.5:t:6426696-6427309	N3	chromosome_3:6427309-6427406	0.0001	0.0001	0.0001	0.0001	0.0001	0.0001	0.0001	0.0001	0.0001	0.0001	0.0001	0.0001	0.0001	0.0001	0.0001	0.0001	0.0001	0.0001	0.0732	0.0001	0.0001	0.0001	0.2818	0.0001	0.0001	0.0978	0.0001
Cre03.g195410.v5.5:t:6533660-6533753	N3	chromosome_3:6533753-6533943	0.0001	0.0001	0.0001	0.0536	0.0001	0.0001	0.0001	0.0001	0.0781	0.0698	0.0419	0.0581	0.0682	0.1236	0.0534	0.0652	0.0869	0.1177	0.0583	0.0716	0.0543	0.0093	0.011	0.0001	0.0001	0.0598	0.0131
Cre03.g195500.v5.5:t:6539478-6539590	N3	chromosome_3:6539307-6539517	0.0491	0.0001	0.0001	0.0001	0.0001	0.0001	0.0001	0.0001	0.0961	0.0168	0.009	0.007	0.0076	0.06	0.0754	0.0153	0.048	0.0188	0.0063	0.0295	0.0213	0.0258	0.0139	0.0318	0.0037	0.0022	0.007
Cre03.g195600.v5.5:s:6547470-6547564	N3	chromosome_3:6547564-6547745	0.0581	0.0001	0.0001	0.0419	0.0167	0.014	0.015	0.0186	0.0001	0.0001	0.0001	0.0162	0.0001	0.0176	0.0354	0.0208	0.0511	0.0706	0.0608	0.0104	0.0257	0.0609	0.0052	0.0072	0.0077	0.0216	0.0802
Cre03.g197100.v5.5:t:6651008-6651114	N3	chromosome_3:6650916-6651008	0.0378	0.0455	0.0001	0.0451	0.0001	0.0001	0.0001	0.0001	0.0001	0.0001	0.0001	0.1609	0.0718	0.0001	0.0001	0.0262	0.0001	0.0001	0.0455	0.0294	0.0239	0.0494	0.009	0.0161	0.0122	0.0049	0.0099
Cre03.g197600.v5.5:t:6704752-6705017	N3	chromosome_3:6704668-6704803	0.0001	0.0001	0.0001	0.0001	0.0001	0.0001	0.0001	0.0001	0.0001	0.0001	0.0001	0.0112	0.0001	0.0001	0.0001	0.0001	0.0001	0.239	0.1406	0.0001	0.0001	0.0001	0.0001	0.0001	0.0001	0.0001	0.0001
Cre03.g198050.v5.5:s:6745513-6745750	N3	chromosome_3:6745750-6745984	0.0034	0.0118	0.0052	0.0026	0.0088	0.0032	0.0036	0.0044	0.0063	0.0099	0.0085	0.0766	0.0077	0.0154	0.0132	0.0102	0.017	0.0088	0.01	0.007	0.0075	0.0056	0.0034	0.0042	0.0035	0.0014	0.002
Cre03.g198050.v5.5:t:6745984-6746068	N3	chromosome_3:6745750-6745984	0.0029	0.0238	0.0057	0.003	0.0084	0.0035	0.005	0.0037	0.0063	0.0086	0.0094	0.0698	0.0103	0.0169	0.0175	0.0074	0.0167	0.0094	0.0103	0.0078	0.0074	0.006	0.0032	0.0053	0.0042	0.0018	0.0022
Cre03.g198100.v5.5:s:6753168-6753465	N1	chromosome_3:6753055-6753168	0.2903	0.3329	0.1759	0.3747	0.3269	0.2408	0.2836	0.2731	0.3277	0.3943	0.2477	0.3593	0.3827	0.3184	0.3131	0.3366	0.4436	0.3272	0.398	0.4103	0.3137	0.3687	0.3503	0.3816	0.3281	0.4016	0.3427
Cre03.g198150.v5.5:t:6754697-6754910	N3	chromosome_3:6754495-6754697	0.0056	0.0609	0.0855	0.0234	0.0177	0.0065	0.0103	0.0322	0.0286	0.0089	0.0724	0.077	0.0756	0.0403	0.0061	0.0073	0.0119	0.0081	0.0594	0.0095	0.0103	0.0103	0.0066	0.0101	0.01	0.0319	0.0125
Cre03.g198200.v5.5:s:6770571-6770705	N3	chromosome_3:6770705-6771060	0.0001	0.0001	0.0001	0.0154	0.0001	0.068	0.0001	0.0163	0.0388	0.0388	0.0001	0.025	0.0211	0.0229	0.0218	0.0584	0.0001	0.0001	0.0632	0.0001	0.0759	0.0179	0.0442	0.0733	0.0287	0.0183	0.1303
Cre03.g198200.v5.5:t:6771060-6771174	N3	chromosome_3:6770705-6771060	0.0751	0.0411	0.072	0.0154	0.0001	0.0755	0.0355	0.017	0.0001	0.0001	0.0263	0.022	0.0214	0.0172	0.0217	0.0631	0.0001	0.0263	0.0472	0.0001	0.0803	0.0179	0.0465	0.076	0.0446	0.0186	0.1064
Cre03.g198750.v5.5:t:8361211-8361438	N3	chromosome_3:8360689-8361260	0.0001	0.0001	0.0001	0.1368	0.0001	0.0001	0.0001	0.0109	0.0186	0.0001	0.0001	0.0159	0.0001	0.0907	0.0357	0.038	0.0166	0.0075	0.0622	0.0108	0.0069	0.0228	0.0623	0.0369	0.0718	0.0226	0.0901
Cre03.g200050.v5.5:t:8202130-8202245	N3	chromosome_3:8202245-8202330	0.006	0.0551	0.0121	0.0409	0.0124	0.0053	0.0055	0.0295	0.0134	0.0277	0.0082	0.0529	0.0087	0.0018	0.0023	0.0014	0.0048	0.0019	0.0097	0.0035	0.0053	0.0041	0.0029	0.0043	0.0043	0.0027	0.0082
Cre03.g200207.v5.5:t:8468557-8470951	N3	chromosome_3:8468403-8468779	0.0001	0.0001	0.0001	0.0001	0.0001	0.0001	0.0001	0.0001	0.0001	0.0001	0.0001	0.0001	0.0001	0.0001	0.0001	0.025	0.0001	0.0001	0.1667	0.0001	0.0001	0.075	0.124	0.0001	0.0873	0.0815	0.0417
Cre03.g200600.v5.5:t:8149574-8150217	N2	chromosome_3:8149389-8149574	0.0001	0.0001	0.0001	0.0001	0.0001	0.0001	0.0001	0.0001	0.0001	0.0001	0.3783	0.3533	0.3313	0.3499	0.4961	0.341	0.0001	0.3702	0.6033	0.575	0.0001	0.0001	0.0001	0.0001	0.0001	0.0001	0.0001
Cre03.g200655.v5.5:t:8495907-8496100	N4	chromosome_3:8495685-8495907	0.0001	0.0001	0.0001	0.0001	0.0001	0.0001	0.0001	0.0001	0.0001	0.0001	0.0001	0.4278	0.0001	0.3158	0.0001	0.2909	0.0001	0.4062	0.3968	0.0001	0.4185	0.0001	0.3966	0.2961	0.1606	0.1875	0.0001
Cre03.g200750.v5.5:t:8125111-8125311	N3	chromosome_3:8124975-8125111	0.0001	0.0001	0.0001	0.0001	0.0001	0.0001	0.0001	0.0001	0.0001	0.0281	0.1696	0.1409	0.0001	0.0001	0.0001	0.0001	0.0001	0.0001	0.0001	0.0001	0.0001	0.0001	0.042	0.1764	0.0001	0.1089	0.0001
Cre03.g200879.v5.5:s:8509310-8509329	N3	chromosome_3:8509087-8509310	0.0001	0.0001	0.0752	0.0663	0.0001	0.0487	0.0433	0.0557	0.0577	0.0001	0.0001	0.1668	0.0001	0.0001	0.0001	0.0001	0.0001	0.0001	0.1193	0.0789	0.0736	0.2024	0.1142	0.1345	0.1468	0.0001	0.0001
Cre03.g200879.v5.5:t:8508776-8508881	N3	chromosome_3:8508881-8509013	0.0001	0.0001	0.0628	0.0069	0.0001	0.0077	0.007	0.0472	0.0446	0.0001	0.0001	0.0738	0.0001	0.0001	0.0001	0.0001	0.0001	0.0001	0.0568	0.0132	0.0358	0.0975	0.1453	0.0466	0.1307	0.0001	0.0001
Cre03.g201327.v5.5:s:8522020-8522144	N3	chromosome_3:8521855-8522044	0.0001	0.0001	0.0001	0.0001	0.0001	0.0001	0.0001	0.0001	0.0001	0.119	0.0899	0.1926	0.1334	0.1576	0.1009	0.1248	0.0001	0.1204	0.1016	0.0001	0.0312	0.0001	0.1172	0.0001	0.0001	0.0001	0.0001
Cre03.g201350.v5.5:s:8047462-8047736	N3	chromosome_3:8047501-8047899	0.0001	0.0001	0.0001	0.0235	0.0001	0.0001	0.0001	0.0001	0.0001	0.0001	0.0001	0.0001	0.0001	0.0001	0.0936	0.0621	0.0001	0.1913	0.014	0.0926	0.1079	0.0175	0.0124	0.0432	0.0709	0.0075	0.0401
Cre03.g201350.v5.5:t:8047870-8048153	N3	chromosome_3:8047501-8047899	0.0001	0.0001	0.0001	0.0165	0.0001	0.0001	0.0001	0.0001	0.0001	0.0001	0.0001	0.0001	0.0001	0.0001	0.0787	0.0561	0.0126	0.1808	0.0147	0.098	0.085	0.0147	0.0075	0.0525	0.0603	0.0047	0.0444
Cre03.g202113.v5.5:t:8562985-8563136	N3	chromosome_3:8562444-8563055	0.0276	0.0188	0.0495	0.0299	0.0413	0.0723	0.0078	0.0313	0.0042	0.0226	0.0087	0.0129	0.0328	0.0161	0.0129	0.0055	0.006	0.0148	0.0135	0.0471	0.017	0.0054	0.0089	0.0195	0.0152	0.0165	0.0308
Cre03.g202202.v5.5:t:7928209-7928418	N3	chromosome_3:7927980-7928209	0.0001	0.0001	0.0001	0.0001	0.0001	0.0001	0.0001	0.0001	0.0001	0.0001	0.0001	0.0001	0.0001	0.0001	0.0001	0.0001	0.0001	0.0001	0.0001	0.0001	0.0001	0.0001	0.0001	0.0001	0.0001	0.2165	0.0001
Cre03.g202300.v5.5:t:7919146-7920047	N2	chromosome_3:7918968-7919200	0.0001	0.0001	0.0001	0.0001	0.0001	0.0001	0.0001	0.0001	0.0001	0.2114	0.1461	0.1435	0.1387	0.1925	0.1278	0.1703	0.1071	0.1353	0.2444	0.0001	0.0001	0.0001	0.0001	0.0001	0.0001	0.0001	0.0001
Cre03.g202339.v5.5:s:7912887-7913042	N3	chromosome_3:7912629-7912887	0.0001	0.0001	0.0001	0.0001	0.0001	0.0001	0.0001	0.0001	0.0001	0.0001	0.1817	0.0495	0.1479	0.1661	0.1087	0.1717	0.0001	0.0541	0.1922	0.0001	0.0001	0.0001	0.0001	0.0001	0.0001	0.0001	0.0001
Cre03.g202500.v5.5:t:7883623-7884141	N3	chromosome_3:7883464-7883687	0.0001	0.0001	0.0001	0.0238	0.0001	0.0001	0.0001	0.0085	0.0067	0.0365	0.0039	0.0987	0.005	0.0021	0.0218	0.0061	0.0215	0.0371	0.0108	0.0175	0.0234	0.0095	0.0089	0.0017	0.0165	0.0132	0.0168
Cre03.g202550.v5.5:s:7876683-7876866	N3	chromosome_3:7876389-7876752	0.0001	0.0001	0.0001	0.0001	0.0001	0.0001	0.0001	0.0001	0.0227	0.0001	0.01	0.0108	0.0001	0.01	0.0065	0.0046	0.0001	0.007	0.0074	0.0106	0.0516	0.05	0.0564	0.0077	0.0109	0.1101	0.0001
Cre03.g202550.v5.5:s:7879437-7879564	N7	chromosome_3:7878710-7879437	0.0001	0.0001	0.0001	0.0001	0.0001	0.0001	0.0001	0.0001	0.0001	0.0001	0.0001	0.1401	0.1644	0.0001	0.2716	0.3598	0.0001	0.1307	0.3567	0.0001	0.0001	0.0001	0.2467	0.1129	0.0001	0.3256	0.0001
Cre03.g202550.v5.5:t:7878654-7878710	N2	chromosome_3:7878710-7879437	0.0001	0.0001	0.0001	0.0001	0.0001	0.0001	0.0001	0.0001	0.0001	0.0001	0.0001	0.0795	0.1957	0.3289	0.24	0.3042	0.0001	0.1714	0.3789	0.0001	0.0001	0.0001	0.2239	0.1416	0.0001	0.2403	0.0001
Cre03.g202600.v5.5:s:7872898-7873080	N2	chromosome_3:7872674-7872898	0.2121	0.1467	0.1377	0.1627	0.2156	0.1977	0.0972	0.1104	0.2522	0.0001	0.0001	0.2209	0.2955	0.0001	0.0207	0.1568	0.0001	0.1958	0.1105	0.0943	0.0797	0.0931	0.1114	0.1748	0.1643	0.0951	0.0993
Cre03.g203300.v5.5:t:7772505-7772682	N3	chromosome_3:7772397-7772505	0.0001	0.0001	0.0001	0.079	0.0001	0.0785	0.0176	0.0123	0.1434	0.0001	0.0863	0.1089	0.0679	0.0446	0.0476	0.0795	0.0001	0.2177	0.1402	0.0421	0.0546	0.0101	0.0479	0.0513	0.0312	0.0568	0.0627
Cre03.g203550.v5.5:s:7712987-7713439	N2	chromosome_3:7713065-7713440	0.0001	0.0001	0.0001	0.3376	0.0001	0.0001	0.0001	0.0001	0.0001	0.0001	0.3961	0.4616	0.0001	0.0001	0.0001	0.1063	0.0001	0.0001	0.0001	0.0001	0.0001	0.0001	0.0001	0.0001	0.0001	0.2861	0.3381
Cre03.g203550.v5.5:t:7712295-7712383	N3	chromosome_3:7711978-7712295	0.0001	0.0001	0.0001	0.0198	0.0001	0.0001	0.0974	0.0667	0.0393	0.0532	0.0697	0.044	0.1281	0.0974	0.0817	0.0421	0.0001	0.0087	0.0525	0.0479	0.0117	0.0416	0.0487	0.0069	0.0119	0.0049	0.0491
Cre03.g203550.v5.5:t:7714455-7714513	N2	chromosome_3:7713515-7714455	0.0001	0.0001	0.0001	0.3234	0.0001	0.0001	0.0001	0.0001	0.0001	0.0001	0.2709	0.3425	0.0001	0.0001	0.0001	0.2087	0.0001	0.0001	0.0001	0.0001	0.0001	0.0001	0.0001	0.0001	0.0001	0.1945	0.1454
Cre03.g204689.v5.5:s:8722868-8722971	N7	chromosome_3:8722971-8723316	0.0001	0.0001	0.0001	0.1289	0.0001	0.0001	0.0157	0.0001	0.0001	0.0001	0.0001	0.1228	0.0001	0.0001	0.1655	0.1296	0.0001	0.0238	0.0001	0.0611	0.0001	0.014	0.193	0.0776	0.16	0.2085	0.0939
Cre03.g204752.v5.5:s:7583258-7583383	N3	chromosome_3:7582626-7583258	0.0429	0.0773	0.1121	0.0401	0.0671	0.0893	0.0076	0.0083	0.0082	0.0108	0.047	0.0297	0.0238	0.0258	0.0071	0.0399	0.0403	0.048	0.027	0.008	0.0711	0.0076	0.0036	0.0165	0.0441	0.0228	0.0354
Cre03.g205450.v5.5:t:7495250-7495315	N3	chromosome_3:7494968-7495250	0.0242	0.129	0.0209	0.0606	0.0361	0.0311	0.0128	0.0246	0.0385	0.0532	0.0257	0.0266	0.0203	0.0094	0.0088	0.0079	0.0249	0.0132	0.0177	0.0238	0.0384	0.0159	0.0474	0.0336	0.0567	0.0212	0.0573
Cre03.g205450.v5.5:t:7495598-7496856	N3	chromosome_3:7495315-7495598	0.008	0.0001	0.0001	0.017	0.0001	0.0236	0.0172	0.1215	0.0182	0.0227	0.0183	0.0095	0.017	0.0001	0.0226	0.0177	0.0001	0.0001	0.0451	0.0001	0.0263	0.0001	0.016	0.0298	0.0167	0.0054	0.0101
Cre03.g205650.v5.5:t:7476289-7476821	N3	chromosome_3:7476063-7476289	0.0293	0.0001	0.0001	0.0754	0.0001	0.0839	0.0972	0.154	0.0541	0.0783	0.0825	0.0348	0.0538	0.0626	0.0446	0.0851	0.065	0.0731	0.054	0.0143	0.0297	0.0578	0.1003	0.05	0.0276	0.07	0.0718
Cre03.g205697.v5.5:s:8780029-8780262	N3	chromosome_3:8780262-8783089	0.0001	0.0001	0.0832	0.0088	0.0001	0.0207	0.0186	0.0161	0.0173	0.0205	0.0132	0.1257	0.0152	0.0088	0.0147	0.0082	0.0264	0.0113	0.0184	0.0152	0.0111	0.0118	0.0123	0.0068	0.0136	0.0068	0.0132
Cre03.g205697.v5.5:t:8783089-8783192	N3	chromosome_3:8780262-8783089	0.0001	0.0001	0.0001	0.0119	0.0001	0.0143	0.0001	0.0165	0.0142	0.0134	0.0186	0.07	0.0147	0.014	0.0123	0.0084	0.0293	0.0104	0.0089	0.0193	0.0102	0.012	0.0111	0.0114	0.0161	0.0056	0.0137
Cre03.g205700.v5.5:t:7463333-7463549	N7	chromosome_3:7463065-7463336	0.2926	0.0001	0.0001	0.0001	0.0001	0.0001	0.0001	0.0001	0.0001	0.4046	0.0001	0.2885	0.0001	0.0001	0.0001	0.5554	0.0001	0.0001	0.0001	0.0001	0.0001	0.0001	0.2858	0.0001	0.0001	0.3755	0.0001
Cre03.g205701.v5.5:t:7453928-7454168	N2	chromosome_3:7453715-7453931	0.0486	0.0306	0.0001	0.0477	0.0001	0.1047	0.1177	0.0691	0.0621	0.0407	0.1666	0.192	0.1092	0.0968	0.0962	0.053	0.0557	0.1006	0.0635	0.0761	0.0634	0.0486	0.1312	0.0513	0.06	0.065	0.0765
Cre03.g205701.v5.5:t:7456965-7457136	N3	chromosome_3:7456285-7456965	0.0001	0.0001	0.0001	0.0001	0.0001	0.0001	0.0001	0.0001	0.0001	0.0001	0.0001	0.283	0.0001	0.0001	0.0001	0.0001	0.0001	0.0001	0.0001	0.0001	0.0001	0.0001	0.0001	0.3093	0.0753	0.0001	0.0001
Cre03.g205750.v5.5:t:7450341-7451248	N3	chromosome_3:7450095-7450341	0.0001	0.0001	0.0276	0.0358	0.0001	0.0001	0.0001	0.0251	0.0342	0.0744	0.0141	0.0587	0.042	0.0159	0.0178	0.0536	0.0117	0.0446	0.0815	0.0368	0.0122	0.0833	0.021	0.0717	0.0001	0.1	0.0001
Cre03.g206200.v5.5:t:7390768-7390893	N3	chromosome_3:7390603-7390771	0.0001	0.0001	0.0001	0.2865	0.0001	0.0001	0.0001	0.0001	0.0001	0.0001	0.0001	0.0001	0.0001	0.0001	0.0001	0.0001	0.0001	0.0001	0.0001	0.0001	0.0001	0.0001	0.0451	0.0001	0.0001	0.1383	0.1552
Cre03.g206452.v5.5:t:7353304-7353980	N3	chromosome_3:7353980-7354340	0.0434	0.0382	0.0907	0.0263	0.021	0.0595	0.0485	0.0572	0.0564	0.0328	0.0664	0.0311	0.0054	0.0001	0.0083	0.0475	0.01	0.0186	0.0183	0.03	0.023	0.0609	0.0033	0.0052	0.0077	0.0144	0.0374
Cre03.g207502.v5.5:s:7253359-7253445	N3	chromosome_3:7253255-7253359	0.0191	0.0741	0.0114	0.0085	0.0146	0.0479	0.035	0.0257	0.0636	0.0989	0.022	0.0133	0.0164	0.0423	0.0046	0.0167	0.0465	0.005	0.0065	0.0068	0.006	0.0119	0.0048	0.0081	0.0071	0.0049	0.0112
Cre03.g207600.v5.5:t:7242685-7242917	N4	chromosome_3:7242551-7242697	0.0001	0.0001	0.0001	0.0001	0.0001	0.0001	0.0001	0.0001	0.0001	0.0001	0.0001	0.283	0.0001	0.2956	0.305	0.3693	0.0001	0.3662	0.3592	0.0001	0.5463	0.0001	0.0001	0.0001	0.0001	0.5175	0.0001
Cre03.g207950.v5.5:s:7195745-7196192	N3	chromosome_3:7195310-7195745	0.0566	0.0515	0.0143	0.038	0.0001	0.113	0.0155	0.0136	0.0152	0.0117	0.035	0.0204	0.0222	0.016	0.038	0.0071	0.0185	0.0628	0.0097	0.0136	0.0161	0.0088	0.0071	0.0106	0.0313	0.0151	0.0302
Cre03.g208609.v5.5:s:8930487-8931272	N3	chromosome_3:8931272-8931569	0.008	0.0001	0.0341	0.043	0.0444	0.0316	0.0334	0.0461	0.1233	0.0377	0.0064	0.0371	0.0797	0.041	0.0066	0.0138	0.0067	0.0041	0.0396	0.0078	0.0079	0.0063	0.0648	0.0076	0.0539	0.0395	0.0832
Cre03.g208945.v5.5:t:8961906-8962688	N6	chromosome_3:8962688-8962848	0.0001	0.0001	0.0001	0.3898	0.0001	0.4488	0.3479	0.3238	0.3156	0.3135	0.3496	0.4729	0.237	0.2232	0.4549	0.4046	0.3741	0.3311	0.5552	0.0001	0.2153	0.0001	0.4524	0.0001	0.0001	0.0001	0.0001
Cre03.g209953.v5.5:s:9011664-9012444	N4	chromosome_3:9011332-9011664	0.0001	0.0001	0.0001	0.225	0.0001	0.0001	0.0001	0.0001	0.0001	0.0001	0.0001	0.3082	0.0001	0.0001	0.0001	0.3867	0.0001	0.0001	0.0001	0.0001	0.4586	0.0001	0.5439	0.0001	0.7609	0.6375	0.5913
Cre03.g209953.v5.5:t:9014840-9014990	N2	chromosome_3:9014990-9015227	0.4286	0.0001	0.0001	0.3104	0.0001	0.1304	0.2073	0.0001	0.4331	0.4771	0.3081	0.2341	0.3563	0.0159	0.0001	0.0645	0.1372	0.0112	0.141	0.0783	0.0077	0.0129	0.0046	0.0066	0.0388	0.0367	0.0064
Cre03.g210065.v5.5:s:9028738-9028996	N3	chromosome_3:9028558-9028784	0.0001	0.0001	0.0001	0.0001	0.0001	0.0001	0.0001	0.0001	0.0001	0.0001	0.0001	0.0001	0.0001	0.0001	0.0001	0.0001	0.0001	0.0001	0.0001	0.0001	0.0001	0.0001	0.0001	0.0001	0.0001	0.3016	0.0001
Cre03.g211745.v5.5:s:9129283-9129525	N3	chromosome_3:9129104-9129283	0.0001	0.0001	0.0001	0.1067	0.0125	0.0243	0.0074	0.0041	0.0379	0.0031	0.0037	0.0125	0.0059	0.0124	0.0026	0.0185	0.005	0.003	0.0377	0.0198	0.0427	0.0295	0.0201	0.0369	0.0073	0.0182	0.0229
Cre03.g212641.v5.5:s:9169292-9169489	N7	chromosome_3:9168938-9169292	0.1435	0.0001	0.0001	0.2025	0.064	0.1595	0.0001	0.0001	0.0001	0.0001	0.0001	0.241	0.0001	0.0001	0.0001	0.0001	0.0001	0.0001	0.0001	0.0001	0.1357	0.1056	0.1513	0.0976	0.0001	0.1266	0.0979
Cre04.g211650.v5.5:s:1835110-1835352	N3	chromosome_4:1835352-1835644	0.0001	0.0001	0.0001	0.0001	0.0001	0.0001	0.0001	0.0001	0.0001	0.0001	0.0001	0.0209	0.0001	0.1515	0.0099	0.0434	0.0001	0.0462	0.0479	0.0134	0.0368	0.013	0.0841	0.0132	0.0106	0.0077	0.0185
Cre04.g211650.v5.5:t:1835644-1835719	N3	chromosome_4:1835352-1835644	0.0001	0.0001	0.0001	0.0001	0.0001	0.0001	0.0001	0.0001	0.0001	0.0001	0.0001	0.026	0.0001	0.1604	0.0166	0.0603	0.0001	0.0599	0.0536	0.0186	0.0574	0.025	0.104	0.0192	0.0179	0.0113	0.0334
Cre04.g212150.v5.5:s:1771966-1772073	N3	chromosome_4:1771044-1771966	0.0358	0.0001	0.0001	0.0332	0.0001	0.0411	0.0001	0.0932	0.0578	0.0279	0.0656	0.0229	0.0001	0.0295	0.0278	0.1141	0.0315	0.0728	0.0358	0.0001	0.0491	0.0559	0.0484	0.0327	0.0108	0.0801	0.0747
Cre04.g212150.v5.5:s:1772642-1772749	N3	chromosome_4:1772073-1772642	0.0313	0.0001	0.0001	0.1978	0.0001	0.1531	0.0001	0.0001	0.1497	0.0459	0.1967	0.1359	0.0501	0.02	0.0164	0.043	0.0001	0.0448	0.0229	0.0198	0.0105	0.009	0.006	0.0095	0.0079	0.0033	0.0084
Cre04.g212150.v5.5:s:1775574-1775780	N3	chromosome_4:1775016-1775574	0.0001	0.0001	0.0001	0.0143	0.0001	0.0158	0.0186	0.012	0.0746	0.0001	0.0144	0.1285	0.0175	0.0127	0.0107	0.0104	0.0001	0.0145	0.0129	0.0604	0.0903	0.0682	0.018	0.023	0.0179	0.0033	0.0072
Cre04.g212150.v5.5:t:1770896-1771044	N3	chromosome_4:1771044-1771966	0.0278	0.0001	0.0001	0.023	0.0001	0.0177	0.0199	0.0965	0.083	0.0264	0.0001	0.0248	0.0001	0.0265	0.023	0.0692	0.0294	0.0779	0.0204	0.0166	0.0515	0.0414	0.0603	0.0271	0.0095	0.0609	0.0661
Cre04.g212200.v5.5:s:1766131-1766389	N2	chromosome_4:1765480-1766165	0.0636	0.2053	0.1572	0.0768	0.146	0.1546	0.1534	0.103	0.1278	0.1236	0.0833	0.0855	0.1396	0.1098	0.1663	0.0726	0.124	0.0448	0.0377	0.0341	0.0442	0.0595	0.0371	0.0269	0.0345	0.0325	0.0547
Cre04.g212200.v5.5:t:1764576-1764697	N4	chromosome_4:1764697-1765003	0.2922	0.0001	0.0001	0.2126	0.1148	0.195	0.2185	0.3021	0.172	0.0001	0.0001	0.282	0.0001	0.0001	0.0119	0.3831	0.0001	0.318	0.3185	0.0001	0.3285	0.0001	0.3051	0.447	0.3575	0.2733	0.3788
Cre04.g213251.v5.5:s:1609336-1609490	N3	chromosome_4:1609124-1609336	0.0272	0.0291	0.0268	0.0088	0.0068	0.0027	0.0055	0.0068	0.0141	0.0513	0.0991	0.0043	0.006	0.0126	0.0112	0.0342	0.0703	0.0211	0.006	0.0081	0.0166	0.0199	0.0034	0.0199	0.0153	0.0086	0.026
Cre04.g213800.v5.5:s:1511122-1511180	N7	chromosome_4:1510666-1511122	0.0001	0.0001	0.0001	0.0001	0.0001	0.0001	0.0001	0.0001	0.0001	0.0001	0.0001	0.1058	0.0001	0.0001	0.0001	0.0001	0.0001	0.0001	0.0001	0.0001	0.0001	0.0001	0.6601	0.0001	0.0001	0.5386	0.0001
Cre04.g213800.v5.5:t:1510600-1510666	N7	chromosome_4:1510666-1511122	0.0001	0.0001	0.0001	0.0001	0.0001	0.0001	0.0001	0.0001	0.0001	0.0001	0.0001	0.1154	0.0001	0.0001	0.0001	0.0001	0.0001	0.0001	0.0001	0.0001	0.0001	0.0001	0.6257	0.0001	0.0001	0.5533	0.0001
Cre04.g213905.v5.5:t:1503483-1505485	N4	chromosome_4:1503177-1503483	0.0369	0.0083	0.1487	0.0543	0.0573	0.0677	0.0559	0.0898	0.0424	0.0852	0.0882	0.0465	0.1031	0.1433	0.1633	0.1688	0.1666	0.2118	0.2699	0.3519	0.3892	0.5302	0.4219	0.3846	0.3918	0.2292	0.2954
Cre04.g214150.v5.5:s:1450887-1451308	N3	chromosome_4:1451276-1451604	0.0256	0.0131	0.0079	0.0032	0.0011	0.0041	0.0052	0.005	0.0055	0.0056	0.0035	0.006	0.0016	0.0039	0.0084	0.0108	0.0104	0.0088	0.033	0.0415	0.0685	0.0715	0.119	0.1054	0.1391	0.0968	0.1173
Cre04.g214250.v5.5:s:1425929-1426105	N4	chromosome_4:1426105-1426494	0.0001	0.0001	0.0001	0.1488	0.0001	0.0001	0.186	0.3113	0.202	0.1752	0.1776	0.1907	0.2223	0.2153	0.2101	0.2093	0.0001	0.1481	0.142	0.1979	0.2758	0.2764	0.2055	0.2456	0.299	0.1662	0.1329
Cre04.g214500.v5.5:s:1348753-1348904	N3	chromosome_4:1348389-1348753	0.0001	0.0001	0.0001	0.0001	0.0001	0.0001	0.0081	0.0614	0.0413	0.0438	0.0717	0.0753	0.048	0.0585	0.0473	0.062	0.0295	0.0755	0.0466	0.0573	0.0687	0.0551	0.0319	0.0348	0.073	0.0447	0.0599
Cre04.g214502.v5.5:s:1369871-1370085	N3	chromosome_4:1369265-1369871	0.0469	0.0329	0.0516	0.0705	0.0332	0.0576	0.0504	0.0555	0.0762	0.0965	0.0674	0.0998	0.0748	0.0785	0.0888	0.0693	0.0513	0.0287	0.0647	0.1002	0.0864	0.0001	0.0207	0.0001	0.0001	0.0714	0.0001
Cre04.g214503.v5.5:t:1372296-1372354	N1	chromosome_4:1372198-1372305	0.4164	0.5213	0.499	0.4101	0.4299	0.4657	0.4544	0.4574	0.4187	0.4586	0.4234	0.4195	0.392	0.4459	0.4214	0.4636	0.4544	0.394	0.4655	0.4548	0.4734	0.4656	0.4046	0.4415	0.4744	0.4442	0.438
Cre04.g214750.v5.5:s:1293020-1293299	N7	chromosome_4:1292785-1293020	0.0001	0.0001	0.0001	0.0001	0.0001	0.0001	0.0001	0.0001	0.0001	0.0001	0.0001	0.0001	0.0001	0.0001	0.0001	0.0001	0.0001	0.0001	0.1938	0.0001	0.2128	0.0001	0.234	0.3036	0.1925	0.2571	0.2614
Cre04.g214801.v5.5:t:1290172-1290294	N7	chromosome_4:1289904-1290172	0.0001	0.0001	0.0001	0.0001	0.0001	0.0001	0.0001	0.0001	0.0001	0.0001	0.0001	0.0001	0.0001	0.0001	0.0001	0.5368	0.0001	0.349	0.0001	0.0001	0.1353	0.2136	0.2962	0.3152	0.0281	0.2642	0.0001
Cre04.g214801.v5.5:t:1290943-1291396	N7	chromosome_4:1290785-1290943	0.0001	0.0001	0.0001	0.0001	0.0001	0.0001	0.0001	0.0001	0.0001	0.0001	0.0001	0.0001	0.0001	0.0001	0.1119	0.026	0.0001	0.0249	0.0815	0.1352	0.1985	0.0001	0.1183	0.2478	0.1408	0.0304	0.079
Cre04.g214900.v5.5:s:1278135-1278617	N7	chromosome_4:1278032-1278135	0.0187	0.028	0.026	0.009	0.0238	0.0125	0.0149	0.0101	0.0142	0.0264	0.0151	0.0065	0.0655	0.0001	0.1138	0.091	0.0682	0.0713	0.1203	0.0969	0.06	0.0721	0.1897	0.0833	0.1588	0.104	0.1254
Cre04.g214900.v5.5:s:1279259-1279753	N3	chromosome_4:1278617-1279259	0.1795	0.0001	0.0001	0.0208	0.0001	0.0135	0.0001	0.016	0.0001	0.0303	0.0001	0.1243	0.0001	0.0001	0.0001	0.0742	0.0001	0.0001	0.0001	0.0222	0.0001	0.0001	0.0507	0.0171	0.0195	0.0144	0.0001
Cre04.g214900.v5.5:t:1278135-1278617	N3	chromosome_4:1278617-1279259	0.1187	0.0001	0.0293	0.0292	0.0001	0.0228	0.0228	0.0166	0.028	0.0289	0.0001	0.0909	0.0001	0.0001	0.0952	0.054	0.0001	0.0946	0.0313	0.0238	0.0253	0.0001	0.054	0.0173	0.0278	0.0132	0.0291
Cre04.g215000.v5.5:s:1265560-1265628	N3	chromosome_4:1265290-1265560	0.3625	0.0277	0.1389	0.0517	0.0001	0.0001	0.0001	0.0001	0.0001	0.0001	0.0001	0.0001	0.0001	0.0001	0.0001	0.0001	0.0001	0.0001	0.0001	0.0001	0.0001	0.0001	0.0001	0.0001	0.0001	0.0001	0.0001
Cre04.g215000.v5.5:s:1266810-1266918	N3	chromosome_4:1265628-1266810	0.0946	0.0638	0.0095	0.0147	0.05	0.018	0.0206	0.0238	0.0001	0.0001	0.0001	0.0001	0.0001	0.0001	0.0001	0.0001	0.0001	0.0001	0.0001	0.0001	0.0001	0.0001	0.0001	0.0001	0.0001	0.0001	0.0001
Cre04.g215000.v5.5:t:1265560-1265628	N3	chromosome_4:1265628-1266810	0.0877	0.0581	0.0085	0.0128	0.0399	0.0129	0.0001	0.0001	0.0001	0.0001	0.0001	0.0001	0.0001	0.0001	0.0001	0.0001	0.0001	0.0001	0.0001	0.0001	0.0001	0.0001	0.0001	0.0001	0.0001	0.0001	0.0001
Cre04.g215400.v5.5:s:1216879-1217084	N3	chromosome_4:1216383-1216879	0.3004	0.0724	0.0545	0.1736	0.14	0.0841	0.1735	0.0825	0.0722	0.0001	0.1162	0.2085	0.0001	0.0001	0.0001	0.0001	0.0001	0.0001	0.0001	0.0001	0.0001	0.0001	0.0001	0.0001	0.0001	0.0001	0.0001
Cre04.g215600.v5.5:t:1184427-1184549	N1	chromosome_4:1184334-1184427	0.1293	0.687	0.7296	0.7695	0.6965	0.7287	0.6416	0.483	0.3103	0.383	0.2023	0.2667	0.1975	0.2089	0.1526	0.178	0.1029	0.2079	0.2548	0.1851	0.0976	0.0996	0.1069	0.0722	0.0428	0.0153	0.1017
Cre04.g215950.v5.5:t:1137289-1137408	N3	chromosome_4:1137158-1137304	0.1816	0.0316	0.0578	0.0884	0.0001	0.0237	0.0626	0.0792	0.0913	0.112	0.0883	0.0942	0.0778	0.0857	0.0278	0.0645	0.0001	0.0459	0.0201	0.0001	0.1038	0.0231	0.1365	0.0216	0.1446	0.0612	0.0554
Cre04.g216000.v5.5:t:1128560-1128868	N3	chromosome_4:1128868-1129388	0.0001	0.0001	0.0001	0.2516	0.0001	0.0001	0.0001	0.0001	0.0001	0.0602	0.0996	0.1461	0.0071	0.0423	0.0029	0.0015	0.0042	0.0037	0.0033	0.0028	0.0024	0.0031	0.0026	0.0027	0.0029	0.0028	0.0918
Cre04.g216350.v5.5:s:1074223-1074635	N3	chromosome_4:1073337-1074223	0.0573	0.0077	0.0166	0.0238	0.0312	0.0038	0.0112	0.0103	0.0329	0.0187	0.0101	0.0167	0.0034	0.0038	0.0054	0.0163	0.0159	0.0056	0.0468	0.0353	0.0303	0.0625	0.0511	0.0056	0.0236	0.0699	0.0276
Cre04.g216350.v5.5:t:1073291-1073428	N3	chromosome_4:1073337-1074223	0.0765	0.0076	0.0166	0.0247	0.0395	0.0031	0.0149	0.0107	0.041	0.0162	0.013	0.0225	0.0033	0.0035	0.0043	0.0165	0.0095	0.0043	0.0523	0.0402	0.0277	0.0603	0.0607	0.0043	0.0233	0.0755	0.0271
Cre04.g216811.v5.5:t:131837-135107	N2	chromosome_4:131725-131840	0.5526	0.0001	0.0001	0.0001	0.0001	0.0001	0.0001	0.0001	0.0001	0.3428	0.2847	0.5069	0.3321	0.0001	0.0001	0.0001	0.0001	0.0001	0.0001	0.0001	0.0001	0.0001	0.3867	0.0001	0.1759	0.3679	0.3184
Cre04.g216826.v5.5:t:138321-138503	N3	chromosome_4:137771-138321	0.0001	0.0001	0.0001	0.0001	0.0001	0.0001	0.0001	0.0001	0.0001	0.0001	0.0001	0.0001	0.0001	0.0001	0.0001	0.0001	0.0001	0.0001	0.0001	0.0001	0.0001	0.0001	0.0001	0.0001	0.0001	0.2042	0.0001
Cre04.g216902.v5.5:s:159692-160353	N1	chromosome_4:159211-160191	0.3392	0.0001	0.3565	0.493	0.2286	0.471	0.3944	0.339	0.2269	0.555	0.283	0.5199	0.0001	0.4446	0.4554	0.4293	0.4579	0.361	0.3976	0.5135	0.5782	0.3596	0.3962	0.4746	0.4729	0.4398	0.446
Cre04.g217200.v5.5:s:204630-204796	N3	chromosome_4:204331-204630	0.0273	0.0295	0.0694	0.032	0.0135	0.0319	0.0067	0.0385	0.0217	0.0302	0.0111	0.0311	0.0635	0.0587	0.0387	0.0194	0.0193	0.0036	0.0465	0.006	0.0439	0.0145	0.013	0.0433	0.0335	0.0101	0.0249
Cre04.g217220.v5.5:s:209916-210410	N6	chromosome_4:209583-209916	0.0001	0.0001	0.0001	0.0001	0.0001	0.6597	0.7306	0.4722	0.5397	0.0001	0.5644	0.5526	0.0001	0.0001	0.3172	0.4548	0.0001	0.3775	0.444	0.4459	0.3705	0.5701	0.3795	0.3785	0.0001	0.5992	0.3454
Cre04.g217750.v5.5:t:277955-278049	N3	chromosome_4:277674-277955	0.0293	0.0611	0.0112	0.0041	0.0001	0.0294	0.0062	0.0047	0.0058	0.0065	0.0334	0.0292	0.0473	0.0237	0.0247	0.0219	0.0105	0.0178	0.0226	0.0619	0.0524	0.0353	0.0844	0.0281	0.0574	0.0717	0.0774
Cre04.g217911.v5.5:s:354437-354640	N3	chromosome_4:354274-354437	0.0323	0.0208	0.0555	0.0254	0.0001	0.0446	0.0654	0.0326	0.0177	0.0503	0.0125	0.0493	0.0695	0.0503	0.0677	0.0401	0.0902	0.0281	0.0291	0.0476	0.0079	0.0706	0.0512	0.0377	0.0424	0.0249	0.0568
Cre04.g217929.v5.5:s:478261-478444	N3	chromosome_4:477944-478277	0.0055	0.0145	0.0081	0.0163	0.0101	0.0153	0.0134	0.0032	0.0035	0.0037	0.0023	0.0086	0.021	0.0031	0.0159	0.0323	0.025	0.0283	0.0036	0.0335	0.0273	0.0213	0.0201	0.0204	0.0181	0.0531	0.0234
Cre04.g217930.v5.5:s:495294-495377	N3	chromosome_4:494962-495294	0.0084	0.0001	0.0001	0.0001	0.0001	0.0001	0.0001	0.1169	0.0001	0.0199	0.0368	0.0254	0.0087	0.1185	0.0109	0.0288	0.0175	0.1584	0.01	0.0152	0.0146	0.1663	0.0257	0.0601	0.0336	0.0317	0.0001
Cre04.g217946.v5.5:s:638767-639347	N2	chromosome_4:638523-638767	0.0001	0.0001	0.0001	0.0001	0.0001	0.0001	0.0001	0.3557	0.3853	0.2732	0.3111	0.2123	0.2628	0.2091	0.1881	0.1893	0.025	0.2083	0.1822	0.0001	0.2111	0.242	0.1127	0.0001	0.1804	0.171	0.0001
Cre04.g217963.v5.5:t:749410-749602	N7	chromosome_4:748901-749410	0.0001	0.0001	0.0001	0.0001	0.0001	0.0001	0.0001	0.0001	0.0001	0.0001	0.0001	0.3258	0.0001	0.0001	0.0001	0.0001	0.0001	0.0001	0.0001	0.0001	0.0001	0.0001	0.54	0.4874	0.2383	0.3132	0.0001
Cre04.g217963.v5.5:t:749954-750029	N3	chromosome_4:749602-749954	0.0001	0.0001	0.0001	0.0428	0.0001	0.0201	0.0001	0.0996	0.0332	0.0411	0.1527	0.1006	0.0201	0.0451	0.0001	0.0163	0.0001	0.0193	0.0333	0.0249	0.0516	0.0241	0.0124	0.0123	0.0219	0.06	0.0118
Cre04.g217973.v5.5:t:813423-813803	N2	chromosome_4:813803-813902	0.0001	0.0001	0.0001	0.0001	0.0001	0.0001	0.0001	0.0001	0.0001	0.0001	0.3383	0.3318	0.2966	0.2424	0.1877	0.2304	0.2118	0.285	0.2707	0.2728	0.3028	0.0001	0.2381	0.2511	0.0001	0.1796	0.0001
Cre04.g218050.v5.5:s:1911984-1912262	N4	chromosome_4:1911867-1911984	0.6449	0.0001	0.0001	0.5035	0.0001	0.0001	0.0001	0.0001	0.0001	0.0001	0.0001	0.0001	0.0001	0.0001	0.0001	0.0001	0.0001	0.0001	0.166	0.0001	0.0001	0.5	0.3949	0.544	0.4797	0.3501	0.3148
Cre04.g218750.v5.5:t:1997111-1997245	N4	chromosome_4:1997233-1997935	0.1516	0.1584	0.1401	0.1017	0.2255	0.1506	0.133	0.133	0.1301	0.191	0.1603	0.0609	0.1875	0.1179	0.273	0.2706	0.1673	0.1928	0.2313	0.1885	0.2036	0.2163	0.2478	0.1798	0.3486	0.2981	0.1657
Cre04.g219200.v5.5:s:2088171-2088446	N3	chromosome_4:2087976-2088171	0.0951	0.0001	0.0001	0.0229	0.0001	0.0001	0.0893	0.0262	0.0001	0.0001	0.0001	0.0195	0.0001	0.0001	0.092	0.0629	0.0001	0.0366	0.0316	0.1096	0.0541	0.0211	0.0842	0.127	0.1193	0.0246	0.073
Cre04.g219200.v5.5:t:2087510-2087569	N3	chromosome_4:2087569-2087807	0.0389	0.0001	0.0001	0.1954	0.0001	0.0001	0.0208	0.0176	0.0001	0.0001	0.0001	0.0504	0.0001	0.0001	0.0859	0.0582	0.0001	0.0083	0.1759	0.1015	0.0818	0.014	0.1001	0.0805	0.0745	0.0382	0.0401
Cre04.g219500.v5.5:t:2120479-2120700	N3	chromosome_4:2120265-2120479	0.0001	0.0001	0.0001	0.0001	0.0001	0.0001	0.0001	0.0001	0.0001	0.0001	0.0001	0.2039	0.0001	0.3333	0.0001	0.0001	0.0001	0.2462	0.0001	0.0001	0.0001	0.0001	0.0001	0.0001	0.0001	0.0001	0.0001
Cre04.g219700.v5.5:s:2151180-2151343	N3	chromosome_4:2150693-2151180	0.0226	0.0001	0.0001	0.1004	0.0001	0.0101	0.0522	0.0582	0.0512	0.0505	0.005	0.0281	0.0479	0.0466	0.0335	0.0718	0.0383	0.0882	0.02	0.1393	0.0669	0.021	0.0358	0.0671	0.0826	0.0795	0.0576
Cre04.g219725.v5.5:s:2154690-2154803	N3	chromosome_4:2154486-2154690	0.0001	0.0001	0.0001	0.0001	0.0001	0.0001	0.0001	0.0001	0.0001	0.0001	0.2377	0.0001	0.0001	0.0001	0.0224	0.0001	0.0001	0.0001	0.0001	0.0001	0.0001	0.0001	0.0001	0.0001	0.0001	0.0001	0.0001
Cre04.g220200.v5.5:t:2254260-2255428	N2	chromosome_4:2255428-2255640	0.2264	0.1549	0.1279	0.1684	0.1389	0.182	0.1989	0.1938	0.1088	0.2673	0.1942	0.1655	0.1569	0.1599	0.062	0.079	0.091	0.0627	0.158	0.0713	0.0502	0.0945	0.0716	0.0955	0.0612	0.1252	0.1333
Cre04.g220550.v5.5:s:2308716-2309183	N3	chromosome_4:2308605-2308951	0.0001	0.0001	0.0001	0.1137	0.0001	0.0001	0.0001	0.0001	0.0001	0.3209	0.0001	0.1304	0.0001	0.0001	0.0001	0.0001	0.0001	0.0001	0.0001	0.0001	0.0001	0.0001	0.0001	0.0001	0.0001	0.0001	0.0001
Cre04.g220633.v5.5:t:2324216-2324659	N1	chromosome_4:2324041-2324221	0.4238	0.5154	0.4778	0.4471	0.2971	0.4547	0.421	0.4578	0.4215	0.449	0.4217	0.4488	0.3279	0.4342	0.4194	0.4146	0.4856	0.4956	0.4553	0.3329	0.448	0.472	0.4643	0.515	0.3107	0.3988	0.4309
Cre04.g220800.v5.5:t:2347012-2347648	N3	chromosome_4:2346604-2347012	0.0278	0.0001	0.0001	0.1447	0.0001	0.0001	0.0001	0.0001	0.0001	0.0001	0.0001	0.0198	0.0001	0.0001	0.0092	0.0733	0.0001	0.0086	0.0099	0.0476	0.0136	0.0186	0.0134	0.0138	0.0001	0.014	0.0661
Cre04.g221650.v5.5:s:2461119-2461532	N3	chromosome_4:2460815-2461119	0.0332	0.0001	0.0001	0.0315	0.0001	0.0001	0.0001	0.0001	0.0001	0.0253	0.0838	0.0114	0.0163	0.0001	0.0721	0.121	0.0001	0.024	0.0001	0.0001	0.0001	0.0001	0.0001	0.0001	0.1307	0.0611	0.0001
Cre04.g222500.v5.5:s:2573098-2573273	N3	chromosome_4:2572847-2573250	0.0001	0.0001	0.0001	0.0001	0.0001	0.0001	0.0001	0.0001	0.0001	0.0001	0.0001	0.0739	0.0174	0.0237	0.0187	0.0526	0.0277	0.0001	0.0268	0.0001	0.0001	0.0001	0.0001	0.0001	0.0001	0.0001	0.0001
Cre04.g222800.v5.5:t:2622696-2624280	N3	chromosome_4:2622522-2622696	0.0121	0.0094	0.0296	0.0144	0.0096	0.0391	0.0202	0.0946	0.0123	0.0001	0.0001	0.0142	0.0001	0.0001	0.0197	0.0168	0.0001	0.0119	0.0139	0.0001	0.0125	0.0108	0.0097	0.0123	0.0123	0.0056	0.0085
Cre04.g223750.v5.5:t:2774840-2775088	N2	chromosome_4:2775088-2775198	0.0001	0.0001	0.0001	0.6306	0.0001	0.0001	0.0001	0.2108	0.0001	0.3063	0.0001	0.4195	0.546	0.2232	0.1539	0.1905	0.0001	0.1413	0.1529	0.098	0.1726	0.1844	0.1378	0.066	0.1853	0.1541	0.1458
Cre04.g224100.v5.5:s:2810242-2810622	N3	chromosome_4:2809975-2810242	0.0455	0.0333	0.0152	0.0048	0.0162	0.0703	0.0107	0.0101	0.024	0.0823	0.0276	0.0459	0.0229	0.0225	0.0103	0.0065	0.0227	0.0069	0.0098	0.0097	0.055	0.0091	0.0185	0.0091	0.0092	0.0079	0.0143
Cre04.g224350.v5.5:s:2854890-2855008	N4	chromosome_4:2854675-2854890	0.0001	0.0001	0.0001	0.2901	0.0001	0.1172	0.0961	0.0514	0.0786	0.0751	0.1606	0.0813	0.1136	0.0265	0.1182	0.2152	0.0001	0.1754	0.1058	0.2779	0.3167	0.0001	0.1921	0.1753	0.2887	0.1588	0.1763
Cre04.g224750.v5.5:s:2951376-2951846	N1	chromosome_4:2951846-2952209	0.6167	0.9789	0.4678	0.0614	0.9748	0.624	0.4356	0.5095	0.7639	0.0072	0.0114	0.2773	0.5034	0.0031	0.0026	0.0063	0.9921	0.3978	0.12	0.6305	0.0063	0.0081	0.0039	0.9895	0.0067	0.3735	0.4855
Cre04.g224750.v5.5:t:2952209-2952269	N6	chromosome_4:2951846-2952209	0.4047	0.4687	0.2542	0.0457	0.576	0.4199	0.3159	0.3665	0.3928	0.0049	0.0074	0.1821	0.3563	0.0022	0.002	0.0052	0.5518	0.2703	0.0952	0.3774	0.0049	0.0047	0.0032	0.7169	0.0048	0.2918	0.3701
Cre04.g224800.v5.5:s:2957437-2957612	N3	chromosome_4:2956793-2957480	0.0359	0.0001	0.0001	0.0001	0.0001	0.0001	0.0001	0.0001	0.0001	0.018	0.0113	0.0057	0.0072	0.0001	0.0071	0.0073	0.0001	0.0123	0.0101	0.0139	0.0148	0.0001	0.0116	0.0054	0.0213	0.0957	0.0001
Cre04.g225200.v5.5:s:3054736-3054905	N7	chromosome_4:3054494-3054736	0.0001	0.0001	0.0001	0.1053	0.0001	0.0001	0.0001	0.0001	0.0001	0.0001	0.0001	0.0001	0.0001	0.0001	0.0001	0.1847	0.0001	0.2064	0.0873	0.2045	0.0849	0.0715	0.0412	0.133	0.1183	0.0685	0.22
Cre04.g225200.v5.5:t:3041049-3041484	N3	chromosome_4:3041484-3042075	0.0226	0.0001	0.0001	0.0104	0.0001	0.0001	0.0127	0.0973	0.0166	0.009	0.0114	0.0041	0.0096	0.0096	0.0255	0.0177	0.008	0.0042	0.0297	0.0243	0.0263	0.055	0.0268	0.0441	0.011	0.0634	0.013
Cre04.g225350.v5.5:s:3077944-3078038	N1	chromosome_4:3077762-3077989	0.3454	0.5048	0.3463	0.4425	0.3393	0.4888	0.3524	0.4042	0.3473	0.4491	0.4163	0.3119	0.372	0.3708	0.3872	0.3917	0.4499	0.4238	0.3504	0.3701	0.3696	0.4081	0.439	0.3845	0.3811	0.3222	0.3236
Cre04.g225500.v5.5:t:3091776-3091910	N7	chromosome_4:3091541-3091819	0.3566	0.0001	0.0001	0.0001	0.0001	0.0001	0.0001	0.0001	0.2647	0.0001	0.0001	0.0001	0.0001	0.0001	0.0001	0.4132	0.0001	0.314	0.2195	0.0001	0.0001	0.0001	0.4394	0.0001	0.0001	0.1306	0.3179
Cre04.g225700.v5.5:t:3098827-3099202	N4	chromosome_4:3098657-3098827	0.0001	0.0001	0.0001	0.1195	0.0001	0.0001	0.0001	0.0779	0.2542	0.236	0.0001	0.2011	0.2843	0.2888	0.3052	0.3533	0.0001	0.176	0.3177	0.1907	0.0001	0.2533	0.2196	0.1893	0.2916	0.1321	0.1928
Cre04.g225700.v5.5:t:3099483-3099630	N3	chromosome_4:3099202-3099483	0.0901	0.0001	0.0238	0.0338	0.0001	0.0214	0.0298	0.0139	0.0161	0.1297	0.0352	0.1441	0.0551	0.1091	0.1419	0.0591	0.0167	0.0167	0.0726	0.1199	0.0713	0.0521	0.0493	0.013	0.0455	0.1328	0.0501
Cre04.g225750.v5.5:t:3109110-3109219	N6	chromosome_4:3109219-3109975	0.5142	0.6442	0.6613	0.6738	0.0001	0.633	0.0001	0.0001	0.573	0.3132	0.305	0.3745	0.3796	0.2957	0.0734	0.0975	0.0001	0.1352	0.139	0.1661	0.2245	0.1353	0.2098	0.1037	0.2554	0.2223	0.2107
Cre04.g226450.v5.5:s:3219178-3219290	N2	chromosome_4:3218797-3219178	0.159	0.1087	0.1667	0.1408	0.1143	0.1386	0.1159	0.0711	0.1168	0.1	0.1112	0.1233	0.1029	0.0889	0.0694	0.0802	0.1109	0.1125	0.1835	0.1345	0.1468	0.0601	0.1049	0.102	0.0705	0.1232	0.144
Cre04.g227000.v5.5:t:3304879-3305661	N3	chromosome_4:3304735-3304889	0.0001	0.0001	0.0001	0.0001	0.0001	0.0001	0.0001	0.0001	0.0001	0.0001	0.0001	0.121	0.0001	0.014	0.0001	0.0166	0.0001	0.0001	0.102	0.0001	0.0001	0.0001	0.0001	0.0001	0.0001	0.0001	0.0001
Cre04.g227050.v5.5:s:3318347-3318466	N3	chromosome_4:3318466-3318801	0.0001	0.0001	0.0001	0.09	0.0001	0.0001	0.0001	0.0001	0.0001	0.0001	0.0001	0.0001	0.0001	0.0001	0.0001	0.0001	0.0001	0.0001	0.0001	0.0001	0.0001	0.0001	0.0001	0.0001	0.0001	0.2211	0.0001
Cre04.g227050.v5.5:t:3314678-3315505	N3	chromosome_4:3314507-3314682	0.0001	0.0001	0.0001	0.0001	0.0001	0.0001	0.0001	0.0001	0.0001	0.0001	0.0001	0.0001	0.0001	0.0001	0.0001	0.0343	0.0001	0.0001	0.0001	0.0001	0.0277	0.0001	0.0187	0.0718	0.0513	0.0991	0.0151
Cre04.g227301.v5.5:t:3344469-3345058	N3	chromosome_4:3345058-3345958	0.0001	0.0001	0.0001	0.0001	0.0001	0.0001	0.0001	0.0001	0.0001	0.0001	0.0001	0.0417	0.0001	0.0001	0.0001	0.0001	0.0001	0.0001	0.0394	0.0001	0.0001	0.0001	0.1958	0.0455	0.0001	0.05	0.0001
Cre04.g227750.v5.5:s:3456730-3457915	N3	chromosome_4:3456371-3456730	0.0001	0.0001	0.0001	0.0001	0.0001	0.0001	0.0001	0.0001	0.0001	0.0933	0.0555	0.03	0.0336	0.0086	0.061	0.0752	0.0001	0.076	0.0767	0.1066	0.0001	0.0001	0.0001	0.0001	0.0001	0.0001	0.0001
Cre04.g227800.v5.5:s:3475319-3475412	N3	chromosome_4:3475077-3475323	0.0001	0.0001	0.0001	0.0001	0.0001	0.0001	0.0001	0.0001	0.0001	0.0001	0.159	0.16	0.0001	0.0891	0.0001	0.0001	0.0001	0.0001	0.0001	0.0001	0.0001	0.0001	0.0001	0.0001	0.0001	0.0001	0.0001
Cre04.g228150.v5.5:s:3520190-3520261	N7	chromosome_4:3520261-3520955	0.2693	0.0001	0.0001	0.2934	0.0001	0.0096	0.0001	0.0699	0.0001	0.0001	0.0001	0.0934	0.0001	0.0001	0.0001	0.106	0.1467	0.0155	0.1825	0.0001	0.0001	0.1546	0.1164	0.1265	0.0125	0.317	0.2756
Cre04.g228150.v5.5:t:3520955-3521016	N7	chromosome_4:3520261-3520955	0.425	0.0001	0.0001	0.324	0.028	0.0264	0.0279	0.0001	0.0001	0.0001	0.0001	0.0001	0.0001	0.0001	0.0001	0.1504	0.0001	0.0001	0.2059	0.0001	0.1923	0.0001	0.1563	0.0001	0.042	0.352	0.286
Cre04.g228400.v5.5:s:3564183-3564466	N1	chromosome_4:3564070-3564183	0.3005	0.2486	0.3723	0.4065	0.0001	0.3107	0.281	0.2765	0.2801	0.2565	0.3056	0.2701	0.2798	0.3795	0.4339	0.4334	0.4063	0.3888	0.3689	0.3298	0.4349	0.3168	0.3586	0.2637	0.5038	0.4344	0.3667
Cre04.g228900.v5.5:s:3672673-3672786	N7	chromosome_4:3671725-3672673	0.0001	0.0001	0.0001	0.0268	0.0001	0.024	0.0216	0.0254	0.0696	0.0491	0.0923	0.0459	0.1756	0.0089	0.0393	0.0837	0.0919	0.0859	0.0263	0.1279	0.0529	0.1127	0.0991	0.096	0.1243	0.0802	0.054
Cre04.g228900.v5.5:t:3671670-3671725	N7	chromosome_4:3671725-3672673	0.0001	0.0001	0.0001	0.0278	0.0001	0.0001	0.025	0.0299	0.0703	0.0536	0.0837	0.0518	0.1833	0.0099	0.0382	0.0908	0.1287	0.0986	0.0307	0.1438	0.0591	0.1332	0.135	0.1616	0.2025	0.0978	0.0793
Cre04.g228900.v5.5:t:3675412-3675521	N7	chromosome_4:3675521-3675902	0.0001	0.0001	0.0001	0.0119	0.0001	0.0191	0.1182	0.0931	0.0268	0.0419	0.0496	0.0237	0.0445	0.0572	0.0038	0.0795	0.0755	0.1148	0.0774	0.0905	0.1131	0.0433	0.2372	0.0001	0.2291	0.0801	0.1372
Cre04.g229226.v5.5:s:3721340-3721616	N3	chromosome_4:3721191-3721450	0.0001	0.0001	0.0001	0.0001	0.0001	0.0001	0.0001	0.0001	0.0001	0.0001	0.0001	0.3104	0.2194	0.0001	0.0001	0.0001	0.0001	0.0001	0.0001	0.0001	0.0001	0.0001	0.0001	0.0001	0.0001	0.0001	0.0001
Cre04.g229550.v5.5:s:3782248-3782612	N4	chromosome_4:3781937-3782248	0.1859	0.168	0.2362	0.1393	0.1767	0.2045	0.1374	0.1057	0.1466	0.2452	0.1025	0.2884	0.1764	0.255	0.2162	0.3031	0.2556	0.2566	0.2741	0.4323	0.2972	0.2078	0.3005	0.302	0.3137	0.3073	0.2719
Cre04.g229550.v5.5:s:3791924-3792065	N3	chromosome_4:3791714-3791976	0.0555	0.024	0.0718	0.0104	0.0878	0.0429	0.0325	0.0335	0.1426	0.0217	0.0476	0.032	0.0155	0.0606	0.0328	0.0273	0.0469	0.062	0.0488	0.0494	0.0046	0.0601	0.0389	0.0403	0.0604	0.0193	0.039
Cre04.g229650.v5.5:s:3801976-3802461	N3	chromosome_4:3801866-3801976	0.0001	0.0001	0.0001	0.0103	0.0001	0.1116	0.0001	0.0001	0.0001	0.0001	0.0001	0.015	0.0176	0.0281	0.0001	0.093	0.0001	0.0001	0.0533	0.0001	0.0001	0.0146	0.0141	0.0518	0.1832	0.08	0.0784
Cre04.g230340.v5.5:t:3868574-3868947	N3	chromosome_4:3868363-3868595	0.0001	0.0001	0.0001	0.008	0.0001	0.0001	0.0114	0.0108	0.0179	0.0001	0.0001	0.012	0.0152	0.0441	0.0846	0.0044	0.0134	0.0053	0.0087	0.0119	0.0249	0.031	0.0281	0.0234	0.0064	0.0247	0.0488
Cre04.g230928.v5.5:t:3921080-3923414	N3	chromosome_4:3923384-3923731	0.0001	0.0001	0.0126	0.0337	0.0001	0.062	0.0291	0.1022	0.0068	0.0626	0.0416	0.0031	0.0924	0.008	0.0776	0.0587	0.0001	0.0074	0.0125	0.0001	0.0001	0.0001	0.0001	0.0001	0.0001	0.0001	0.0001
Cre04.g231418.v5.5:t:3957621-3957749	N4	chromosome_4:3957387-3957626	0.2845	0.0001	0.0001	0.2363	0.0001	0.1757	0.2038	0.3406	0.3031	0.1951	0.1192	0.0819	0.1532	0.0001	0.0001	0.2876	0.0001	0.4471	0.3138	0.2042	0.5	0.2045	0.2594	0.3612	0.0001	0.3192	0.2599
Cre04.g231516.v5.5:s:3962668-3962749	N6	chromosome_4:3962749-3963116	0.3055	0.0001	0.4005	0.3929	0.2592	0.2862	0.3282	0.4089	0.3749	0.2916	0.3868	0.3517	0.3321	0.3056	0.3092	0.3613	0.2432	0.3235	0.2761	0.3392	0.2998	0.2896	0.1762	0.2516	0.2912	0.2491	0.3102
Cre04.g233202.v5.5:t:4071091-4071140	N3	chromosome_4:4070919-4071091	0.0001	0.0001	0.0001	0.0539	0.0001	0.0144	0.0001	0.0001	0.0001	0.0001	0.0165	0.0392	0.0001	0.1373	0.0741	0.0342	0.0001	0.0361	0.039	0.0103	0.0614	0.1278	0.155	0.0552	0.0001	0.1333	0.0001
Cre04.g233302.v5.5:s:4082690-4082816	N2	chromosome_4:4082538-4082690	0.0001	0.0001	0.0001	0.0001	0.0001	0.0001	0.2607	0.065	0.17	0.105	0.2369	0.1959	0.16	0.1438	0.1169	0.1843	0.069	0.1105	0.0919	0.0088	0.1972	0.0682	0.1116	0.0908	0.1336	0.0468	0.0001
Cre05.g230900.v5.5:s:667383-667532	N3	chromosome_5:667275-667383	0.0153	0.0001	0.024	0.0123	0.0001	0.073	0.0178	0.0124	0.0337	0.0147	0.0102	0.1114	0.0109	0.0112	0.0097	0.0051	0.0129	0.0107	0.0086	0.0129	0.0112	0.0197	0.0098	0.0168	0.0148	0.0421	0.0218
Cre05.g230971.v5.5:s:659139-659183	N3	chromosome_5:658954-659139	0.0753	0.0455	0.0001	0.0178	0.0001	0.0001	0.0001	0.0001	0.0001	0.0001	0.0227	0.0335	0.0253	0.0414	0.0211	0.0194	0.0361	0.0644	0.0673	0.1103	0.0069	0.0589	0.0222	0.041	0.0621	0.0328	0.0203
Cre05.g231000.v5.5:t:651847-652355	N3	chromosome_5:651309-651847	0.0001	0.0001	0.0129	0.0109	0.0001	0.0147	0.0839	0.0139	0.0001	0.0117	0.0381	0.0082	0.009	0.01	0.0773	0.0074	0.0001	0.0462	0.1771	0.0125	0.0001	0.0001	0.0567	0.0001	0.0001	0.0138	0.0001
Cre05.g231002.v5.5:s:656633-657268	N3	chromosome_5:655715-656633	0.0085	0.0001	0.0001	0.0416	0.0001	0.0185	0.0001	0.0001	0.0001	0.0001	0.0001	0.0644	0.0001	0.0001	0.0514	0.0974	0.0001	0.0126	0.0177	0.0124	0.013	0.0111	0.0084	0.0703	0.0647	0.0947	0.007
Cre05.g231100.v5.5:s:638210-638391	N3	chromosome_5:638020-638210	0.0001	0.0001	0.0001	0.0001	0.0001	0.0001	0.0001	0.0001	0.0001	0.0001	0.0111	0.0652	0.0993	0.1779	0.3752	0.2112	0.0151	0.0496	0.0675	0.1963	0.0001	0.0001	0.0001	0.0001	0.0001	0.0001	0.0001
Cre05.g231100.v5.5:s:638584-638736	N3	chromosome_5:638391-638584	0.0001	0.0001	0.0001	0.0001	0.0001	0.0001	0.0001	0.0001	0.0001	0.1731	0.1966	0.2187	0.1508	0.1502	0.1324	0.0483	0.0321	0.0164	0.0259	0.0802	0.0001	0.0001	0.0001	0.0001	0.0001	0.0001	0.0001
Cre05.g231100.v5.5:t:639725-639823	N2	chromosome_5:639787-640026	0.0001	0.0001	0.0001	0.0001	0.0001	0.0001	0.0001	0.0001	0.0001	0.271	0.3308	0.4064	0.2274	0.2256	0.2866	0.2706	0.2968	0.3028	0.2582	0.3355	0.0001	0.0001	0.0001	0.0001	0.0001	0.0001	0.0001
Cre05.g232000.v5.5:s:613993-614069	N2	chromosome_5:614069-615093	0.1891	0.0001	0.0001	0.073	0.131	0.1453	0.1144	0.0277	0.0721	0.1192	0.1881	0.16	0.1518	0.1712	0.096	0.158	0.0677	0.1337	0.2009	0.1538	0.122	0.1048	0.1835	0.1449	0.0787	0.1298	0.2191
Cre05.g232100.v5.5:s:601419-601594	N3	chromosome_5:601184-601419	0.0001	0.0001	0.0001	0.0229	0.0001	0.0759	0.0001	0.0603	0.0627	0.0335	0.1239	0.0189	0.0099	0.0035	0.0171	0.0152	0.0178	0.0151	0.0044	0.011	0.0121	0.0051	0.0181	0.0133	0.0049	0.008	0.0086
Cre05.g232100.v5.5:t:601108-601184	N3	chromosome_5:601184-601419	0.0001	0.0001	0.0001	0.0151	0.0001	0.0542	0.0293	0.0419	0.0426	0.0245	0.0787	0.0195	0.0075	0.0027	0.0141	0.013	0.0134	0.0107	0.0033	0.0109	0.0116	0.0038	0.0155	0.0109	0.0048	0.0069	0.0055
Cre05.g232300.v5.5:s:567520-567739	N4	chromosome_5:567220-567528	0.0001	0.0001	0.0001	0.0001	0.0001	0.0001	0.0001	0.4067	0.0001	0.0001	0.0001	0.2889	0.0001	0.4056	0.0001	0.3718	0.0001	0.3194	0.0001	0.1918	0.1823	0.455	0.4163	0.305	0.1615	0.2756	0.4185
Cre05.g232500.v5.5:s:450923-451609	N3	chromosome_5:451609-451804	0.0001	0.0001	0.0001	0.0001	0.0001	0.0001	0.0001	0.0001	0.0001	0.0001	0.0001	0.0001	0.0001	0.0001	0.0001	0.0001	0.0001	0.0001	0.0001	0.0001	0.0476	0.0077	0.0304	0.0418	0.0357	0.0304	0.1302
Cre05.g232500.v5.5:t:455291-455373	N2	chromosome_5:455194-455291	0.0001	0.0001	0.0001	0.0001	0.0001	0.0001	0.0001	0.0001	0.0001	0.0001	0.0001	0.8718	0.0001	0.0001	0.0001	0.0001	0.0001	0.1727	0.0001	0.0001	0.0458	0.0088	0.0039	0.0058	0.006	0.0017	0.005
Cre05.g232500.v5.5:t:456926-457085	N3	chromosome_5:456469-456926	0.0001	0.0001	0.0001	0.0001	0.0001	0.0001	0.0001	0.0001	0.0001	0.0001	0.0001	0.0001	0.0001	0.0001	0.0001	0.0788	0.0001	0.0001	0.0001	0.0001	0.0633	0.0804	0.0281	0.0601	0.0588	0.0625	0.0092
Cre05.g232750.v5.5:s:420817-420841	N2	chromosome_5:420591-420817	0.1207	0.0001	0.0001	0.0456	0.0987	0.083	0.116	0.0479	0.1603	0.0814	0.0737	0.1085	0.0971	0.1331	0.0471	0.0944	0.1173	0.1303	0.132	0.1203	0.1108	0.0861	0.0932	0.1114	0.1186	0.092	0.0314
Cre05.g232750.v5.5:t:420008-420262	N2	chromosome_5:420262-420469	0.1564	0.0001	0.0001	0.09	0.1007	0.0239	0.137	0.0852	0.1182	0.0453	0.0751	0.1298	0.0701	0.1435	0.0641	0.0931	0.115	0.1295	0.1506	0.097	0.1077	0.0817	0.1205	0.1478	0.0669	0.1022	0.0703
Cre05.g232751.v5.5:s:426238-426305	N3	chromosome_5:426119-426238	0.0001	0.0001	0.0001	0.0001	0.0001	0.0001	0.0001	0.0555	0.0499	0.0419	0.0257	0.029	0.016	0.0148	0.0046	0.0512	0.1192	0.0609	0.0263	0.0866	0.0001	0.0001	0.0001	0.0001	0.0001	0.0001	0.0001
Cre05.g233051.v5.5:s:380260-380342	N2	chromosome_5:380342-380732	0.2456	0.0001	0.0001	0.2376	0.1643	0.1255	0.118	0.1029	0.284	0.1691	0.2567	0.2154	0.1773	0.2304	0.1465	0.0084	0.0001	0.022	0.054	0.0098	0.047	0.0417	0.0351	0.0481	0.0478	0.0326	0.0523
Cre05.g233051.v5.5:t:381034-381075	N3	chromosome_5:380752-381034	0.0303	0.0001	0.0001	0.147	0.0709	0.0524	0.0308	0.0325	0.1407	0.1313	0.0871	0.0484	0.0195	0.1547	0.0582	0.0057	0.0001	0.0147	0.0076	0.0063	0.0185	0.0227	0.0107	0.0327	0.0187	0.0119	0.0415
Cre05.g233450.v5.5:s:308898-309287	N3	chromosome_5:308467-308930	0.0001	0.0001	0.0001	0.0146	0.0001	0.0001	0.0001	0.0001	0.0741	0.0702	0.0356	0.0788	0.0838	0.0001	0.0973	0.0124	0.0001	0.0611	0.0142	0.0001	0.0001	0.0001	0.0259	0.0001	0.0001	0.0001	0.0001
Cre05.g233450.v5.5:s:309454-309493	N3	chromosome_5:309282-309454	0.0001	0.0001	0.0001	0.0147	0.0001	0.0001	0.0217	0.0193	0.0351	0.0157	0.0104	0.1324	0.0141	0.0219	0.0176	0.0137	0.0001	0.0168	0.0138	0.0001	0.0311	0.0266	0.0219	0.0001	0.0282	0.0186	0.0001
Cre05.g234250.v5.5:s:189987-190035	N7	chromosome_5:189890-189987	0.0001	0.0001	0.0001	0.0001	0.0001	0.0001	0.0001	0.0001	0.0001	0.0001	0.0001	0.0001	0.0001	0.0001	0.0001	0.2036	0.0001	0.4079	0.0001	0.3036	0.0001	0.0001	0.3194	0.0001	0.2488	0.3999	0.0001
Cre05.g234640.v5.5:s:2127336-2127412	N3	chromosome_5:2126885-2127336	0.0001	0.0001	0.0001	0.0001	0.0001	0.0001	0.0001	0.0001	0.0001	0.0001	0.0001	0.0001	0.0001	0.0001	0.0001	0.0001	0.0001	0.0001	0.0001	0.0001	0.0001	0.0001	0.2358	0.0001	0.0001	0.0829	0.0001
Cre05.g234648.v5.5:s:2180506-2180696	N3	chromosome_5:2180212-2180623	0.0046	0.0194	0.023	0.0056	0.0146	0.008	0.009	0.0253	0.0053	0.0175	0.0038	0.0065	0.0081	0.0273	0.0135	0.0138	0.0185	0.0199	0.036	0.0127	0.0529	0.0188	0.028	0.0075	0.0313	0.0251	0.0234
Cre05.g234649.v5.5:s:2181146-2181491	N3	chromosome_5:2181491-2181639	0.0001	0.0001	0.0001	0.0001	0.0001	0.0001	0.0001	0.0001	0.0001	0.0001	0.0001	0.0001	0.0001	0.0001	0.0001	0.0001	0.0001	0.07	0.0139	0.0001	0.0001	0.0001	0.0983	0.1622	0.0133	0.1221	0.0229
Cre05.g234652.v5.5:t:2200479-2200575	N3	chromosome_5:2200337-2200479	0.0029	0.0086	0.0064	0.0031	0.0093	0.0057	0.0089	0.0041	0.0052	0.0047	0.0036	0.0022	0.0042	0.0059	0.0248	0.0354	0.0166	0.0063	0.0101	0.0419	0.0156	0.0136	0.0229	0.0784	0.0142	0.0883	0.0401
Cre05.g234666.v5.5:t:2273379-2273494	N3	chromosome_5:2273148-2273379	0.0001	0.0001	0.0001	0.0001	0.0001	0.0001	0.0001	0.0001	0.0001	0.0001	0.0001	0.0001	0.0001	0.0001	0.0001	0.0001	0.0001	0.0663	0.1667	0.1103	0.0001	0.0001	0.1862	0.0001	0.0001	0.0001	0.0001
Cre05.g234700.v5.5:s:2297743-2297977	N3	chromosome_5:2297505-2297743	0.0046	0.031	0.0083	0.0103	0.0125	0.0038	0.0162	0.003	0.0054	0.0068	0.0049	0.0732	0.0084	0.0118	0.0127	0.0057	0.0167	0.0096	0.0001	0.0114	0.0085	0.009	0.0053	0.0072	0.0098	0.0052	0.0042
Cre05.g235650.v5.5:t:2491853-2492129	N3	chromosome_5:2491680-2491913	0.0357	0.0001	0.0001	0.125	0.0001	0.0001	0.028	0.0001	0.0001	0.0001	0.0218	0.0255	0.0001	0.1316	0.0001	0.0734	0.0001	0.0252	0.0001	0.0264	0.0654	0.0237	0.0147	0.1075	0.1352	0.1268	0.0452
Cre05.g235750.v5.5:s:2504014-2504168	N3	chromosome_5:2503875-2504014	0.0001	0.0001	0.0001	0.0001	0.0001	0.0001	0.0001	0.0001	0.0134	0.0219	0.084	0.0978	0.0394	0.1048	0.0768	0.053	0.0485	0.084	0.0435	0.0167	0.0001	0.041	0.0001	0.0001	0.0001	0.0001	0.0001
Cre05.g236100.v5.5:s:2580349-2580465	N3	chromosome_5:2580168-2580349	0.0001	0.0001	0.0001	0.0001	0.0001	0.0001	0.0001	0.0001	0.0001	0.0001	0.0001	0.0725	0.0001	0.0718	0.185	0.0218	0.0001	0.0451	0.0295	0.0001	0.0001	0.0001	0.0995	0.0001	0.0001	0.0243	0.0001
Cre05.g236150.v5.5:t:2582864-2583006	N3	chromosome_5:2582690-2582864	0.1324	0.0548	0.1591	0.0986	0.1599	0.2357	0.0001	0.0001	0.1608	0.0281	0.0462	0.0558	0.162	0.0001	0.0001	0.1389	0.0001	0.0315	0.0001	0.0001	0.0001	0.0001	0.0001	0.0001	0.0001	0.0001	0.0001
Cre05.g236250.v5.5:t:2615066-2615215	N4	chromosome_5:2614919-2615066	0.0001	0.0001	0.0001	0.0001	0.0001	0.0001	0.0001	0.183	0.182	0.3393	0.0001	0.1326	0.0001	0.2903	0.3471	0.3048	0.0001	0.3788	0.242	0.0001	0.3052	0.4038	0.3269	0.2855	0.4275	0.3099	0.0001
Cre05.g236400.v5.5:s:2638383-2638652	N4	chromosome_5:2638166-2638415	0.2421	0.0001	0.0001	0.3661	0.0001	0.0001	0.0001	0.0001	0.0001	0.0001	0.0001	0.1965	0.0001	0.3865	0.3023	0.1386	0.0001	0.2588	0.2361	0.0001	0.2094	0.375	0.17	0.0479	0.2882	0.1376	0.3793
Cre05.g236450.v5.5:s:2641437-2641951	N7	chromosome_5:2641237-2641437	0.0001	0.0001	0.0001	0.0001	0.0001	0.0001	0.0001	0.0001	0.0001	0.0001	0.0001	0.0001	0.0001	0.0001	0.0001	0.0001	0.0001	0.0001	0.0001	0.0001	0.0001	0.0001	0.3136	0.1774	0.1449	0.3353	0.0001
Cre05.g236450.v5.5:t:2642332-2642429	N3	chromosome_5:2642429-2642740	0.0001	0.0001	0.0001	0.0001	0.0001	0.0001	0.0001	0.0001	0.0001	0.0001	0.0001	0.1738	0.0001	0.0001	0.0001	0.0001	0.0001	0.0001	0.0001	0.0001	0.0001	0.0001	0.0001	0.0001	0.0001	0.0001	0.0001
Cre05.g236500.v5.5:s:2645176-2645242	N3	chromosome_5:2645219-2646028	0.019	0.0001	0.0001	0.197	0.0001	0.059	0.1382	0.0768	0.111	0.0725	0.0473	0.0661	0.09	0.0136	0.0095	0.0411	0.0001	0.0077	0.0844	0.0103	0.0001	0.0132	0.0622	0.014	0.0566	0.0352	0.0596
Cre05.g236500.v5.5:t:2646028-2646123	N3	chromosome_5:2645219-2646028	0.0278	0.0001	0.0001	0.1651	0.0001	0.0001	0.1419	0.1372	0.1717	0.0972	0.0716	0.0869	0.0828	0.0134	0.0145	0.0491	0.0001	0.0001	0.1231	0.0221	0.0185	0.0001	0.0777	0.0128	0.0001	0.0663	0.0001
Cre05.g236926.v5.5:s:2758574-2760160	N3	chromosome_5:2758429-2758574	0.0001	0.0001	0.0001	0.0001	0.0001	0.0001	0.0001	0.0001	0.0001	0.0001	0.0001	0.2874	0.0001	0.0001	0.0001	0.0001	0.0001	0.0001	0.0001	0.0001	0.0001	0.0001	0.0001	0.0001	0.0001	0.0001	0.0001
Cre05.g237150.v5.5:s:2787942-2788017	N2	chromosome_5:2787727-2787942	0.0001	0.0001	0.0001	0.0001	0.0001	0.0001	0.0001	0.0001	0.1341	0.1565	0.1493	0.1329	0.202	0.1272	0.1356	0.1511	0.1287	0.1225	0.1348	0.152	0.1424	0.2296	0.1205	0.0001	0.0001	0.1244	0.0001
Cre05.g237283.v5.5:t:2807755-2807918	N7	chromosome_5:2807636-2807795	0.0001	0.0001	0.0001	0.073	0.0001	0.0799	0.023	0.0734	0.0963	0.0158	0.01	0.0276	0.0435	0.236	0.0887	0.1059	0.1354	0.1382	0.133	0.1165	0.1629	0.1096	0.1463	0.2139	0.2189	0.0947	0.1107
Cre05.g237350.v5.5:s:2811702-2811855	N1	chromosome_5:2811398-2811819	0.7342	0.4987	0.6452	0.6028	0.0001	0.4763	0.5904	0.6122	0.8053	0.4041	0.4763	0.55	0.5371	0.3165	0.2996	0.4483	0.4878	0.2805	0.339	0.3178	0.2906	0.269	0.2326	0.3414	0.285	0.3355	0.4736
Cre05.g237400.v5.5:t:2814307-2814425	N2	chromosome_5:2814228-2814313	0.0735	0.055	0.0248	0.0576	0.035	0.0539	0.0538	0.0638	0.0427	0.0435	0.1372	0.0567	0.0863	0.1667	0.1505	0.1364	0.0428	0.0907	0.1097	0.1612	0.1407	0.1278	0.1418	0.0918	0.1272	0.0852	0.0453
Cre05.g237450.v5.5:s:2818639-2818750	N6	chromosome_5:2818442-2818639	0.0001	0.0001	0.3088	0.2284	0.2118	0.2404	0.2843	0.3102	0.2549	0.2044	0.2513	0.2727	0.2547	0.2253	0.1909	0.1864	0.2027	0.1609	0.1789	0.1907	0.1753	0.1935	0.1977	0.1746	0.1208	0.1726	0.291
Cre05.g237600.v5.5:s:2836768-2836929	N3	chromosome_5:2836602-2836768	0.0001	0.0001	0.0001	0.0001	0.0001	0.0001	0.0001	0.0001	0.0001	0.0001	0.0001	0.1344	0.0001	0.0001	0.0001	0.1397	0.0001	0.0001	0.2086	0.0001	0.0001	0.0001	0.0001	0.0001	0.0001	0.233	0.0001
Cre05.g237950.v5.5:t:2877703-2877773	N2	chromosome_5:2877399-2877703	0.0184	0.1938	0.0836	0.0893	0.056	0.1484	0.1323	0.3203	0.4131	0.4198	0.2664	0.4652	0.4555	0.2352	0.2311	0.0874	0.2062	0.1632	0.1943	0.0245	0.0049	0.0323	0.0108	0.0358	0.0314	0.0055	0.0182
Cre05.g238100.v5.5:s:2906910-2907050	N3	chromosome_5:2907050-2908919	0.0156	0.0001	0.0001	0.0108	0.0001	0.0749	0.023	0.0397	0.0141	0.0344	0.0319	0.0927	0.026	0.1253	0.0167	0.0441	0.0001	0.0137	0.0112	0.0431	0.0494	0.0054	0.0256	0.0337	0.062	0.0223	0.0537
Cre05.g238100.v5.5:t:2908919-2909156	N3	chromosome_5:2907050-2908919	0.0303	0.0001	0.0001	0.0168	0.0001	0.0805	0.0001	0.0895	0.0001	0.0741	0.0789	0.0794	0.0001	0.0001	0.0001	0.0834	0.0001	0.0001	0.0173	0.0535	0.1026	0.0081	0.0423	0.052	0.1228	0.0457	0.0766
Cre05.g238290.v5.5:s:2957970-2958170	N3	chromosome_5:2958170-2958253	0.0001	0.0001	0.0001	0.0001	0.0001	0.1797	0.2516	0.21	0.1079	0.0001	0.0001	0.0001	0.0001	0.0001	0.0001	0.0001	0.0001	0.0001	0.0001	0.0001	0.0001	0.0001	0.0001	0.0001	0.0001	0.0001	0.0001
Cre05.g238850.v5.5:s:3057000-3057108	N3	chromosome_5:3056812-3057020	0.0134	0.0001	0.0001	0.0087	0.0001	0.0675	0.0093	0.0326	0.0349	0.024	0.1352	0.0327	0.0576	0.0514	0.0444	0.0103	0.0001	0.102	0.0796	0.0166	0.0134	0.0139	0.0306	0.0514	0.0169	0.048	0.0176
Cre05.g239000.v5.5:s:3078254-3078494	N3	chromosome_5:3078494-3079327	0.0001	0.0001	0.0001	0.0001	0.0001	0.0001	0.0001	0.0001	0.0001	0.0001	0.0001	0.0001	0.0001	0.0001	0.0001	0.0001	0.0001	0.0001	0.0001	0.0001	0.0001	0.0001	0.1476	0.0001	0.0001	0.123	0.1619
Cre05.g239000.v5.5:t:3079327-3079473	N3	chromosome_5:3078494-3079327	0.0001	0.0001	0.0001	0.0001	0.0001	0.0001	0.0001	0.0001	0.0001	0.0001	0.0001	0.0001	0.0001	0.0001	0.0001	0.0001	0.0001	0.0001	0.0001	0.0001	0.0001	0.0001	0.0001	0.0001	0.0001	0.1057	0.291
Cre05.g239250.v5.5:s:3134507-3134767	N3	chromosome_5:3134767-3135548	0.0001	0.0001	0.0001	0.0001	0.0001	0.0001	0.0001	0.0001	0.021	0.0381	0.0146	0.0639	0.0122	0.0097	0.0217	0.0268	0.0098	0.0118	0.0442	0.0474	0.0207	0.03	0.0001	0.0001	0.0001	0.0001	0.0001
Cre05.g239450.v5.5:t:3160268-3160570	N3	chromosome_5:3159944-3160268	0.0077	0.0001	0.0001	0.0235	0.0001	0.0144	0.0173	0.0267	0.0503	0.0265	0.1494	0.0082	0.0126	0.0151	0.0154	0.0156	0.0332	0.0139	0.018	0.019	0.0225	0.0001	0.0176	0.0155	0.0223	0.0068	0.0186
Cre05.g239900.v5.5:t:3219279-3219438	N3	chromosome_5:3219111-3219283	0.0001	0.0001	0.0001	0.0001	0.0001	0.0001	0.0001	0.0001	0.0001	0.0001	0.0125	0.0641	0.0352	0.0161	0.0286	0.0875	0.0001	0.1119	0.021	0.0001	0.1081	0.094	0.0001	0.0414	0.0001	0.0336	0.0001
Cre05.g240100.v5.5:t:3247308-3247444	N3	chromosome_5:3246920-3247316	0.0001	0.0001	0.0001	0.0001	0.0001	0.0001	0.0001	0.1193	0.0294	0.0598	0.0786	0.0198	0.0096	0.052	0.0887	0.0529	0.0001	0.0887	0.0559	0.125	0.0264	0.0001	0.0201	0.1643	0.1132	0.1529	0.0001
Cre05.g240850.v5.5:s:3366237-3366303	N3	chromosome_5:3366303-3366908	0.0425	0.0081	0.0324	0.0818	0.1103	0.2478	0.2458	0.1906	0.0891	0.071	0.0624	0.0444	0.0285	0.0204	0.0612	0.0439	0.0299	0.0506	0.0362	0.0349	0.0452	0.0434	0.0632	0.0505	0.0776	0.0747	0.0706
Cre05.g240850.v5.5:t:3367940-3368007	N3	chromosome_5:3367009-3367940	0.0122	0.0047	0.0148	0.0244	0.0575	0.1287	0.1575	0.0607	0.0468	0.0424	0.0286	0.0294	0.0177	0.0139	0.0204	0.0246	0.0059	0.015	0.0089	0.0357	0.0084	0.0225	0.0214	0.018	0.0486	0.016	0.047
Cre05.g241202.v5.5:s:3416816-3416855	N7	chromosome_5:3416855-3418231	0.0001	0.0001	0.0001	0.1566	0.0001	0.0208	0.0001	0.0001	0.0001	0.0001	0.0001	0.0777	0.0001	0.1233	0.0001	0.4199	0.0001	0.0829	0.1691	0.0001	0.0964	0.0633	0.0802	0.046	0.0159	0.0237	0.0001
Cre05.g241633.v5.5:t:1920737-1920794	N2	chromosome_5:1920181-1920737	0.0001	0.0001	0.0001	0.0153	0.0001	0.131	0.0001	0.1683	0.1138	0.0693	0.3171	0.1677	0.2744	0.0414	0.0482	0.09	0.0425	0.045	0.0284	0.0428	0.0421	0.0465	0.0101	0.0339	0.0625	0.0122	0.0216
Cre05.g241637.v5.5:s:1960458-1960521	N7	chromosome_5:1960366-1960509	0.0278	0.0001	0.014	0.065	0.0001	0.0089	0.0312	0.0279	0.0656	0.0297	0.0364	0.0501	0.0137	0.0602	0.0645	0.1055	0.1261	0.145	0.1164	0.153	0.15	0.1209	0.1139	0.1242	0.1632	0.1766	0.1291
Cre05.g241638.v5.5:s:1965354-1965431	N7	chromosome_5:1964742-1965354	0.0653	0.0313	0.0001	0.2291	0.0001	0.0001	0.0001	0.0001	0.0001	0.0001	0.1458	0.0469	0.0179	0.0001	0.0001	0.2123	0.0001	0.0257	0.0603	0.0249	0.0883	0.0716	0.141	0.0963	0.0636	0.1496	0.2117
Cre05.g241638.v5.5:t:1964601-1964742	N7	chromosome_5:1964742-1965354	0.0406	0.0001	0.0001	0.1555	0.0001	0.0001	0.0001	0.0001	0.0001	0.1474	0.1209	0.0395	0.0067	0.0001	0.0566	0.1554	0.0001	0.0073	0.0466	0.0093	0.0465	0.0483	0.1226	0.0675	0.0309	0.1118	0.1647
Cre05.g241639.v5.5:s:1968804-1969166	N3	chromosome_5:1969166-1970322	0.0429	0.0144	0.0124	0.0063	0.005	0.0176	0.0044	0.005	0.0108	0.0001	0.0175	0.012	0.1666	0.0001	0.0001	0.0089	0.0001	0.0248	0.015	0.0117	0.0096	0.0152	0.036	0.0531	0.0108	0.0071	0.0072
Cre05.g241653.v5.5:s:2019097-2019359	N3	chromosome_5:2019039-2019131	0.0398	0.0001	0.0001	0.0082	0.0001	0.0168	0.0001	0.0953	0.1131	0.0833	0.0094	0.0544	0.056	0.0125	0.0812	0.0498	0.0693	0.0449	0.0463	0.0311	0.0356	0.0575	0.0344	0.0314	0.0146	0.0821	0.0053
Cre05.g241654.v5.5:s:2021524-2021574	N3	chromosome_5:2021574-2021849	0.0088	0.0257	0.0131	0.0089	0.0185	0.0165	0.0108	0.0715	0.0132	0.0643	0.0108	0.1352	0.0105	0.056	0.0094	0.0278	0.0176	0.0822	0.0358	0.0115	0.0395	0.0673	0.0764	0.0107	0.0315	0.0841	0.104
Cre05.g241654.v5.5:t:2020745-2020800	N3	chromosome_5:2020630-2020745	0.0371	0.0385	0.0265	0.0231	0.0001	0.0417	0.0001	0.025	0.0001	0.0001	0.0001	0.149	0.0001	0.0001	0.0238	0.0158	0.0001	0.0629	0.0194	0.0238	0.0208	0.0219	0.0118	0.0201	0.0136	0.0269	0.0157
Cre05.g241654.v5.5:t:2021849-2021900	N3	chromosome_5:2021574-2021849	0.0157	0.0421	0.0218	0.0169	0.0001	0.0295	0.025	0.0933	0.023	0.0001	0.0179	0.1805	0.0168	0.0761	0.0225	0.0351	0.0236	0.0857	0.0495	0.0161	0.0487	0.0914	0.119	0.0159	0.0434	0.1029	0.153
Cre05.g241750.v5.5:t:1861640-1861721	N6	chromosome_5:1861337-1861640	0.3597	0.3314	0.3485	0.2783	0.0001	0.386	0.3091	0.2437	0.328	0.2119	0.383	0.2443	0.3577	0.1841	0.1687	0.1773	0.0769	0.0992	0.1318	0.1106	0.0812	0.0874	0.0634	0.0887	0.0491	0.0645	0.109
Cre05.g241900.v5.5:t:1844009-1844048	N6	chromosome_5:1843817-1844009	0.0001	0.0001	0.0001	0.4821	0.2865	0.0001	0.0001	0.4014	0.0001	0.5816	0.2277	0.3813	0.2903	0.4209	0.2051	0.2997	0.1975	0.2137	0.2821	0.2355	0.1892	0.2295	0.1969	0.2713	0.3122	0.189	0.3161
Cre05.g242100.v5.5:s:1820913-1821017	N7	chromosome_5:1820760-1820913	0.0001	0.0001	0.0001	0.0164	0.0001	0.0001	0.0001	0.0001	0.0698	0.0001	0.0001	0.0001	0.0001	0.1233	0.0001	0.1842	0.0001	0.2064	0.1006	0.0856	0.146	0.0001	0.0356	0.0887	0.1163	0.057	0.0312
Cre05.g242100.v5.5:s:1824813-1824922	N7	chromosome_5:1824479-1824813	0.0521	0.0001	0.0207	0.0272	0.0001	0.0168	0.0001	0.0136	0.0001	0.0001	0.0001	0.1016	0.0001	0.0606	0.0603	0.0876	0.0001	0.0517	0.0869	0.0001	0.1129	0.0099	0.0662	0.092	0.0539	0.096	0.1635
Cre05.g242602.v5.5:t:1751108-1751257	N3	chromosome_5:1750944-1751108	0.0001	0.0001	0.0001	0.0001	0.0001	0.0001	0.0001	0.0001	0.0001	0.0001	0.0001	0.208	0.0001	0.0001	0.0001	0.1418	0.0001	0.0001	0.0001	0.0001	0.0001	0.0001	0.0001	0.0001	0.0001	0.0001	0.0001
Cre05.g242602.v5.5:t:1751681-1752736	N7	chromosome_5:1751417-1751684	0.0001	0.0001	0.0001	0.0001	0.0001	0.0001	0.0001	0.0001	0.0001	0.0001	0.0001	0.4247	0.0001	0.0001	0.0001	0.0001	0.0001	0.5868	0.0001	0.0001	0.0001	0.0001	0.0001	0.0001	0.2296	0.4155	0.0001
Cre05.g242850.v5.5:t:1675399-1676568	N5	chromosome_5:1675282-1675459	0.4822	0.0001	0.0001	0.3174	0.0001	0.2856	0.0001	0.0001	0.0001	0.0001	0.0001	0.4817	0.0001	0.638	0.0001	0.4397	0.0001	0.5162	0.5803	0.5215	0.4107	0.4296	0.4794	0.4516	0.4515	0.4366	0.5717
Cre05.g242858.v5.5:t:1692619-1692927	N2	chromosome_5:1692407-1692619	0.1015	0.0001	0.1348	0.1169	0.1211	0.1079	0.0106	0.1052	0.1275	0.1114	0.1466	0.1508	0.0986	0.1037	0.2135	0.0934	0.1295	0.1528	0.191	0.0957	0.1329	0.0847	0.0968	0.0288	0.1258	0.0621	0.0704
Cre05.g243050.v5.5:t:1655537-1655609	N3	chromosome_5:1655411-1655561	0.0102	0.0224	0.0235	0.0258	0.0303	0.0177	0.0281	0.0359	0.0287	0.018	0.027	0.0123	0.0305	0.0461	0.0888	0.042	0.0519	0.0241	0.0476	0.0339	0.0204	0.0089	0.0504	0.0231	0.0504	0.0319	0.0751
Cre05.g243353.v5.5:t:1623349-1623631	N7	chromosome_5:1623213-1623349	0.0001	0.0001	0.0001	0.0001	0.0001	0.0001	0.0001	0.0001	0.0001	0.0001	0.0001	0.1156	0.0001	0.0001	0.0001	0.1344	0.0001	0.0001	0.0001	0.0001	0.0623	0.1252	0.1316	0.1264	0.0639	0.1007	0.1071
Cre05.g243450.v5.5:s:1566157-1566267	N3	chromosome_5:1565890-1566157	0.034	0.0001	0.0001	0.02	0.0001	0.0001	0.0242	0.0001	0.0001	0.0001	0.0001	0.0001	0.0001	0.0001	0.014	0.005	0.014	0.006	0.0111	0.0094	0.0167	0.0238	0.0557	0.0034	0.0444	0.0106	0.0082
Cre05.g243450.v5.5:s:1570828-1571187	N7	chromosome_5:1570591-1570828	0.0001	0.0001	0.0001	0.0001	0.0001	0.0001	0.0001	0.0001	0.0001	0.0001	0.0001	0.0001	0.0001	0.0001	0.0001	0.1945	0.0001	0.0001	0.1362	0.0001	0.1738	0.2582	0.0952	0.151	0.2775	0.1922	0.1064
Cre05.g243472.v5.5:t:1560966-1561365	N3	chromosome_5:1560661-1560966	0.0001	0.0001	0.0001	0.2625	0.0001	0.0001	0.0001	0.0001	0.0001	0.0001	0.0001	0.0001	0.0001	0.0001	0.0001	0.007	0.0001	0.0795	0.0001	0.0001	0.0133	0.0001	0.0106	0.011	0.0086	0.0105	0.0087
Cre05.g243801.v5.5:t:1487598-1487707	N4	chromosome_5:1487707-1488054	0.0001	0.0001	0.0001	0.3476	0.0001	0.2518	0.0001	0.0001	0.4071	0.2174	0.1969	0.3246	0.0001	0.2655	0.2388	0.2428	0.1577	0.3126	0.2959	0.2244	0.1777	0.3812	0.2852	0.222	0.213	0.2346	0.2702
Cre05.g243950.v5.5:s:1461305-1461385	N4	chromosome_5:1461159-1461305	0.092	0.0669	0.0731	0.0172	0.0138	0.0073	0.0105	0.0515	0.0086	0.0108	0.0001	0.0077	0.0001	0.0281	0.054	0.1183	0.1647	0.0981	0.1829	0.2166	0.3733	0.2169	0.3033	0.4561	0.3535	0.2687	0.2312
Cre05.g244400.v5.5:t:1377086-1377318	N7	chromosome_5:1376890-1377111	0.2158	0.0001	0.0001	0.0001	0.0001	0.0001	0.0153	0.1193	0.0779	0.0642	0.0536	0.0401	0.0898	0.0535	0.1375	0.0575	0.0373	0.0381	0.0467	0.007	0.0983	0.0923	0.0467	0.1084	0.1509	0.1044	0.1389
Cre05.g244450.v5.5:s:1373127-1373225	N3	chromosome_5:1372801-1373143	0.1389	0.0001	0.0001	0.0451	0.0001	0.0001	0.0001	0.0294	0.0001	0.0501	0.0302	0.0196	0.0146	0.0162	0.0333	0.0388	0.118	0.0209	0.0255	0.0485	0.1025	0.0193	0.1309	0.0001	0.0279	0.0481	0.0263
Cre05.g244550.v5.5:s:1357935-1358158	N4	chromosome_5:1358158-1358984	0.183	0.0704	0.0864	0.1591	0.2584	0.235	0.1295	0.0986	0.136	0.1936	0.1209	0.0746	0.2469	0.1612	0.1817	0.1828	0.2033	0.2188	0.2334	0.2092	0.1769	0.1255	0.1503	0.0975	0.2172	0.2071	0.2783
Cre05.g244550.v5.5:t:1357503-1357717	N1	chromosome_5:1357129-1357503	0.7992	0.4958	0.4862	0.538	0.3671	0.4123	0.3698	0.411	0.4982	0.45	0.4655	0.5161	0.599	0.4524	0.3183	0.3739	0.4026	0.3186	0.35	0.3364	0.325	0.3622	0.401	0.3224	0.329	0.478	0.4162
Cre05.g244550.v5.5:t:1358984-1359195	N2	chromosome_5:1358158-1358984	0.1798	0.0612	0.0839	0.1516	0.2344	0.2168	0.1155	0.0915	0.1175	0.1808	0.104	0.0649	0.2322	0.1343	0.1583	0.1505	0.1729	0.1871	0.189	0.203	0.1537	0.1117	0.1468	0.0837	0.2179	0.2005	0.249
Cre05.g244550.v5.5:t:1359359-1359782	N2	chromosome_5:1359095-1359359	0.0639	0.1099	0.0806	0.1433	0.0835	0.1082	0.0753	0.1082	0.1538	0.1125	0.0726	0.1081	0.0915	0.0954	0.0978	0.0864	0.1092	0.0815	0.0821	0.0745	0.0829	0.0857	0.0869	0.0534	0.045	0.0678	0.0575
Cre05.g244550.v5.5:t:1359967-1361160	N7	chromosome_5:1359649-1359967	0.0987	0.0892	0.1577	0.0793	0.0597	0.0473	0.042	0.0493	0.0486	0.095	0.0721	0.0119	0.1088	0.0468	0.1173	0.1103	0.0518	0.1116	0.056	0.1017	0.1192	0.1059	0.0965	0.1064	0.1149	0.1064	0.0921
Cre05.g244700.v5.5:s:1332968-1333258	N3	chromosome_5:1332863-1333101	0.0339	0.0313	0.0278	0.0431	0.022	0.039	0.0368	0.0209	0.0332	0.0368	0.1365	0.042	0.01	0.0978	0.0568	0.0633	0.0652	0.1141	0.0207	0.0549	0.007	0.0238	0.0306	0.0105	0.0351	0.0045	0.0099
Cre05.g244701.v5.5:s:1343571-1343789	N3	chromosome_5:1343789-1345224	0.0001	0.0001	0.0001	0.0001	0.0001	0.0001	0.0001	0.0001	0.0001	0.0001	0.0001	0.0001	0.0001	0.0001	0.0001	0.0001	0.0001	0.0001	0.0001	0.0001	0.0001	0.0001	0.0001	0.0001	0.0001	0.4185	0.0001
Cre05.g244701.v5.5:t:1345224-1345715	N3	chromosome_5:1343789-1345224	0.0625	0.0001	0.0249	0.0446	0.0001	0.0973	0.0186	0.0167	0.0264	0.1348	0.0753	0.145	0.1394	0.0582	0.0683	0.0575	0.0001	0.043	0.0447	0.0833	0.021	0.1043	0.1255	0.0439	0.1105	0.0474	0.0989
Cre05.g245350.v5.5:s:1205949-1206028	N3	chromosome_5:1206028-1206143	0.0226	0.048	0.0062	0.0027	0.0409	0.0039	0.0041	0.0283	0.0137	0.017	0.0024	0.0255	0.0028	0.0036	0.0217	0.0097	0.0893	0.0094	0.0285	0.0196	0.0276	0.0706	0.0276	0.0605	0.1096	0.058	0.0371
Cre05.g245350.v5.5:t:1201701-1201772	N3	chromosome_5:1201606-1201701	0.0527	0.0497	0.1014	0.0403	0.0336	0.0374	0.0103	0.0459	0.0346	0.0201	0.0415	0.046	0.027	0.0219	0.014	0.0219	0.0364	0.0422	0.0055	0.0335	0.0535	0.0171	0.0189	0.0047	0.0155	0.0099	0.0117
Cre05.g245351.v5.5:s:1221260-1221329	N7	chromosome_5:1221110-1221264	0.0001	0.0001	0.0001	0.0001	0.0001	0.0887	0.0001	0.0001	0.0001	0.0001	0.0001	0.0001	0.0001	0.0001	0.0001	0.0001	0.0001	0.0001	0.0001	0.0001	0.7353	0.1079	0.0001	0.0001	0.0001	0.4323	0.0001
Cre05.g245351.v5.5:t:1220480-1220508	N3	chromosome_5:1220508-1220606	0.0001	0.0001	0.0001	0.0001	0.0001	0.1302	0.0001	0.0001	0.0001	0.0001	0.0001	0.0001	0.0001	0.0001	0.0001	0.0001	0.0001	0.0001	0.0001	0.0001	0.0001	0.0256	0.0001	0.0001	0.0001	0.3574	0.0001
Cre05.g245500.v5.5:t:1182787-1182915	N3	chromosome_5:1182597-1182790	0.0001	0.0001	0.0001	0.0001	0.0001	0.0001	0.0001	0.0001	0.0001	0.0001	0.0001	0.0418	0.0001	0.0001	0.24	0.2853	0.0001	0.2433	0.0001	0.2135	0.0001	0.0001	0.1	0.1159	0.0001	0.0001	0.0001
Cre05.g245700.v5.5:t:1123638-1123751	N4	chromosome_5:1123592-1123638	0.0001	0.0001	0.0001	0.0001	0.0001	0.0001	0.0001	0.0001	0.0001	0.0001	0.1361	0.1744	0.0863	0.1887	0.3072	0.1375	0.1006	0.1921	0.3649	0.4052	0.2095	0.244	0.4483	0.0001	0.0001	0.3352	0.0001
Cre05.g245701.v5.5:t:1148823-1149570	N7	chromosome_5:1149570-1151216	0.0001	0.0001	0.0001	0.0076	0.0001	0.0905	0.0001	0.0001	0.0001	0.0001	0.0001	0.0128	0.0001	0.0112	0.0788	0.0656	0.0076	0.0461	0.1469	0.02	0.0915	0.0757	0.1024	0.0622	0.0969	0.0835	0.1174
Cre05.g246050.v5.5:t:1092881-1094077	N7	chromosome_5:1092556-1092881	0.2167	0.0001	0.0001	0.3077	0.0001	0.0001	0.0001	0.0001	0.0001	0.0001	0.0001	0.1607	0.0001	0.1529	0.0001	0.1928	0.0001	0.0001	0.0001	0.0001	0.1048	0.0209	0.0568	0.1532	0.0788	0.2898	0.1339
Cre05.g246300.v5.5:t:1045226-1045383	N3	chromosome_5:1044862-1045226	0.0001	0.0001	0.0001	0.1104	0.0001	0.0001	0.0001	0.0001	0.0001	0.0001	0.0936	0.0473	0.1858	0.1663	0.0001	0.0001	0.0001	0.2158	0.0001	0.0001	0.0001	0.0001	0.0001	0.0001	0.0001	0.0001	0.0001
Cre05.g247000.v5.5:s:958894-959005	N3	chromosome_5:959005-959360	0.0401	0.0458	0.0055	0.0024	0.0067	0.028	0.0171	0.0299	0.0137	0.0131	0.0707	0.0142	0.0106	0.0249	0.0125	0.0087	0.0455	0.0373	0.0435	0.0045	0.0031	0.035	0.0246	0.017	0.0138	0.0113	0.0329
Cre05.g247000.v5.5:t:959890-961036	N3	chromosome_5:959563-959890	0.0306	0.0134	0.0093	0.0038	0.0111	0.0044	0.0048	0.0032	0.0038	0.0039	0.0568	0.0153	0.0028	0.0155	0.0035	0.0024	0.0071	0.0041	0.0464	0.0072	0.005	0.0054	0.0039	0.0049	0.0041	0.013	0.0035
Cre05.g247400.v5.5:t:900749-900865	N3	chromosome_5:900599-900762	0.0315	0.0001	0.0001	0.016	0.0001	0.0304	0.0092	0.0058	0.0464	0.0048	0.0034	0.0176	0.0778	0.0382	0.0073	0.0383	0.0556	0.0088	0.0079	0.0106	0.0268	0.0334	0.0219	0.0116	0.0118	0.0357	0.0001
Cre05.g247550.v5.5:s:881110-881156	N3	chromosome_5:881156-881749	0.0001	0.0001	0.0001	0.0305	0.0001	0.0001	0.0001	0.0001	0.0111	0.0102	0.0082	0.0857	0.0549	0.0268	0.0379	0.0287	0.0549	0.0223	0.0574	0.0864	0.1226	0.0714	0.104	0.0368	0.0335	0.0743	0.1186
Cre05.g247550.v5.5:t:882078-882207	N3	chromosome_5:881952-882078	0.0001	0.0001	0.0001	0.0229	0.0001	0.0001	0.0001	0.0001	0.0084	0.0379	0.0301	0.0856	0.0544	0.0453	0.0204	0.052	0.0554	0.0314	0.0581	0.0468	0.0209	0.0059	0.0137	0.004	0.0303	0.024	0.0382
Cre05.g248300.v5.5:s:784069-784206	N4	chromosome_5:783160-784069	0.2269	0.0714	0.2047	0.2697	0.1086	0.1861	0.1812	0.1759	0.0001	0.0001	0.0001	0.3659	0.0001	0.0001	0.0001	0.2893	0.2791	0.2434	0.0001	0.1318	0.0001	0.124	0.179	0.2452	0.2003	0.2953	0.2089
Cre06.g248950.v5.5:t:33482-33700	N3	chromosome_6:33332-33490	0.0001	0.0001	0.0001	0.0328	0.0831	0.0161	0.0161	0.0253	0.0247	0.0755	0.0686	0.0382	0.0666	0.0211	0.0001	0.0185	0.0001	0.0001	0.0001	0.0001	0.0001	0.0001	0.0001	0.0001	0.0001	0.0001	0.0001
Cre06.g249650.v5.5:s:96697-96879	N6	chromosome_6:96525-96697	0.0001	0.0001	0.0001	0.403	0.0001	0.0001	0.0001	0.0001	0.4796	0.4873	0.5573	0.4652	0.2873	0.3775	0.3634	0.4046	0.0001	0.2778	0.5426	0.0001	0.0001	0.0001	0.3968	0.3846	0.3515	0.2943	0.0001
Cre06.g250800.v5.5:s:257725-258297	N2	chromosome_6:257552-257725	0.1267	0.0457	0.1339	0.1001	0.0656	0.123	0.0786	0.0921	0.1327	0.1232	0.1357	0.1457	0.1554	0.2147	0.1934	0.2412	0.2252	0.205	0.1891	0.1712	0.1363	0.2121	0.1742	0.1788	0.1634	0.056	0.0786
Cre06.g250850.v5.5:s:265410-265553	N3	chromosome_6:265141-265410	0.0001	0.0001	0.0001	0.026	0.0166	0.0057	0.024	0.0144	0.066	0.0266	0.0485	0.0353	0.0529	0.0104	0.0187	0.0094	0.0001	0.0509	0.0192	0.0001	0.0609	0.0001	0.0001	0.0001	0.0147	0.0001	0.0001
Cre06.g252150.v5.5:s:415518-415597	N3	chromosome_6:415229-415518	0.0058	0.0072	0.0043	0.0491	0.0071	0.0489	0.0031	0.0029	0.0025	0.0031	0.0022	0.0123	0.0488	0.0145	0.0162	0.0217	0.0459	0.0366	0.0695	0.0486	0.0019	0.0589	0.0612	0.0203	0.0743	0.0451	0.0756
Cre06.g252300.v5.5:t:434078-434186	N3	chromosome_6:434186-434852	0.0212	0.012	0.0093	0.0056	0.0236	0.0239	0.0123	0.013	0.0088	0.0144	0.0087	0.0034	0.0075	0.0065	0.0137	0.0237	0.0349	0.013	0.0147	0.0509	0.0101	0.0121	0.0175	0.0036	0.003	0.0507	0.0152
Cre06.g252350.v5.5:t:436580-436801	N2	chromosome_6:436382-436580	0.2318	0.2567	0.1451	0.1384	0.1667	0.1543	0.1014	0.0783	0.0741	0.1029	0.1081	0.1395	0.1204	0.1067	0.1195	0.1246	0.1832	0.0629	0.0621	0.1022	0.07	0.0899	0.1182	0.0808	0.0453	0.1082	0.0998
Cre06.g252850.v5.5:t:532576-532758	N1	chromosome_6:532407-532576	0.3065	0.2674	0.4776	0.3411	0.2995	0.3675	0.4269	0.3927	0.3526	0.3116	0.3408	0.3566	0.2926	0.3464	0.3667	0.3959	0.3735	0.2869	0.4051	0.3746	0.3813	0.4148	0.3557	0.3698	0.1723	0.3344	0.3513
Cre06.g253200.v5.5:s:582686-583083	N3	chromosome_6:582461-582686	0.1001	0.0001	0.0001	0.0508	0.0001	0.0001	0.0001	0.025	0.0001	0.0001	0.0001	0.0411	0.0001	0.0001	0.0001	0.0001	0.0001	0.0299	0.0001	0.0001	0.024	0.056	0.0229	0.0198	0.0538	0.0078	0.0131
Cre06.g253459.v5.5:s:615644-615804	N3	chromosome_6:615804-616194	0.0001	0.0001	0.0001	0.0001	0.0001	0.0001	0.0001	0.0001	0.0001	0.0001	0.0001	0.0001	0.0001	0.0001	0.0001	0.0001	0.0001	0.0119	0.0001	0.0001	0.0001	0.0001	0.2312	0.009	0.0001	0.052	0.0001
Cre06.g253459.v5.5:t:615015-615223	N7	chromosome_6:614624-615015	0.127	0.0001	0.0001	0.0726	0.0001	0.0208	0.0001	0.0417	0.0333	0.0001	0.0296	0.0824	0.0001	0.0206	0.1136	0.0454	0.1667	0.0896	0.0693	0.1327	0.1709	0.1697	0.1713	0.0758	0.119	0.125	0.0569
Cre06.g254800.v5.5:s:862641-862829	N3	chromosome_6:862260-862641	0.0643	0.038	0.0434	0.0675	0.0389	0.0239	0.021	0.0308	0.0494	0.032	0.0569	0.0496	0.0458	0.1133	0.0249	0.0145	0.0277	0.0188	0.0412	0.0393	0.0039	0.0063	0.0129	0.0134	0.0054	0.0271	0.0064
Cre06.g256000.v5.5:t:1011985-1012131	N3	chromosome_6:1011641-1011985	0.0084	0.0226	0.0408	0.0294	0.0594	0.0037	0.0041	0.0154	0.025	0.0039	0.0137	0.0172	0.0129	0.0224	0.016	0.0115	0.0472	0.0606	0.0472	0.0775	0.0225	0.119	0.0769	0.0804	0.0179	0.0354	0.0557
Cre06.g256050.v5.5:t:1015374-1015445	N7	chromosome_6:1015257-1015380	0.1081	0.0001	0.0001	0.0001	0.0001	0.0001	0.0001	0.0001	0.0001	0.0001	0.0001	0.0001	0.0001	0.0755	0.0741	0.0355	0.0448	0.1326	0.0441	0.0964	0.1007	0.0809	0.0679	0.1075	0.0899	0.107	0.0457
Cre06.g256300.v5.5:t:1035303-1035432	N2	chromosome_6:1034791-1035303	0.0829	0.0695	0.1317	0.1017	0.1623	0.1085	0.0709	0.0872	0.1098	0.0771	0.0722	0.1117	0.1474	0.1129	0.0688	0.1158	0.0584	0.167	0.0945	0.0404	0.0693	0.0787	0.0248	0.0349	0.0451	0.0285	0.0347
Cre06.g256700.v5.5:s:1101296-1101340	N3	chromosome_6:1100900-1101296	0.1682	0.0408	0.0001	0.0196	0.0001	0.0252	0.02	0.0086	0.0118	0.0609	0.0302	0.0331	0.0823	0.038	0.0125	0.0094	0.0001	0.0111	0.0139	0.038	0.0118	0.0158	0.0084	0.0097	0.0098	0.0194	0.0189
Cre06.g256700.v5.5:s:1102862-1102939	N3	chromosome_6:1102717-1102862	0.0001	0.0001	0.0001	0.0001	0.0001	0.0001	0.0001	0.0001	0.0001	0.0001	0.0001	0.1375	0.0001	0.0001	0.0001	0.0001	0.0001	0.1771	0.0001	0.0001	0.0001	0.0001	0.0001	0.0001	0.0001	0.0001	0.0001
Cre06.g256700.v5.5:t:1100811-1100900	N3	chromosome_6:1100900-1101296	0.2163	0.0001	0.0001	0.0147	0.0001	0.0186	0.0001	0.0079	0.0129	0.0982	0.0432	0.0768	0.133	0.0394	0.0134	0.0081	0.0001	0.0153	0.0177	0.0604	0.0099	0.0138	0.006	0.0101	0.009	0.0236	0.0144
Cre06.g257600.v5.5:t:1195909-1196003	N2	chromosome_6:1195712-1195909	0.0001	0.0001	0.0001	0.0001	0.0001	0.0001	0.0001	0.0001	0.0001	0.0001	0.0001	0.5231	0.0001	0.3562	0.3037	0.4052	0.0001	0.1991	0.2877	0.0001	0.0001	0.0001	0.0001	0.0001	0.0001	0.0001	0.0001
Cre06.g258300.v5.5:s:1294193-1294442	N3	chromosome_6:1293785-1294193	0.0001	0.0001	0.0001	0.0101	0.0165	0.014	0.0086	0.0508	0.0061	0.0059	0.0431	0.0029	0.0277	0.077	0.0632	0.1337	0.0001	0.0001	0.0195	0.0001	0.0001	0.0001	0.0001	0.0001	0.0001	0.0001	0.0001
Cre06.g258300.v5.5:t:1293561-1293785	N3	chromosome_6:1293785-1294193	0.0001	0.0001	0.0001	0.0138	0.0001	0.0001	0.0096	0.0543	0.0061	0.0063	0.0482	0.0029	0.0308	0.0952	0.0734	0.1341	0.0001	0.0001	0.0223	0.0001	0.0001	0.0001	0.0001	0.0001	0.0001	0.0001	0.0001
Cre06.g259401.v5.5:t:1456957-1457005	N3	chromosome_6:1456313-1456957	0.1039	0.1178	0.1343	0.0788	0.1004	0.0846	0.0784	0.1477	0.1261	0.1551	0.1841	0.0063	0.1197	0.0001	0.0001	0.0001	0.0001	0.0582	0.0388	0.0001	0.0001	0.0833	0.1667	0.0001	0.0001	0.0001	0.0001
Cre06.g260050.v5.5:s:1546090-1547021	N3	chromosome_6:1547021-1547106	0.0632	0.033	0.0086	0.0245	0.1149	0.0385	0.0109	0.0315	0.0278	0.0414	0.1348	0.0101	0.0113	0.017	0.0157	0.0095	0.0178	0.0087	0.0157	0.0158	0.0118	0.0114	0.0109	0.0145	0.0088	0.008	0.0123
Cre06.g260550.v5.5:t:1595749-1596141	N7	chromosome_6:1596131-1596296	0.3335	0.0001	0.0001	0.5372	0.0001	0.0001	0.0001	0.0001	0.0001	0.0001	0.0001	0.0001	0.0001	0.0001	0.0001	0.0001	0.0001	0.0001	0.0001	0.0001	0.0001	0.0001	0.0001	0.2264	0.0001	0.2449	0.0001
Cre06.g260750.v5.5:t:1625635-1625781	N7	chromosome_6:1625781-1628522	0.2418	0.0001	0.3318	0.4179	0.0001	0.0001	0.0001	0.0001	0.0001	0.0001	0.1406	0.3134	0.0001	0.0001	0.0001	0.0001	0.0001	0.0001	0.0001	0.0001	0.2941	0.0001	0.2995	0.0001	0.268	0.4403	0.0001
Cre06.g261450.v5.5:s:1712047-1712105	N3	chromosome_6:1711229-1712047	0.0123	0.0817	0.082	0.0404	0.0289	0.0267	0.062	0.0467	0.0201	0.0406	0.0261	0.0247	0.0283	0.0318	0.0333	0.0334	0.0364	0.0227	0.0345	0.0332	0.0357	0.0409	0.0174	0.0438	0.0123	0.0324	0.0034
Cre06.g261450.v5.5:t:1710713-1711253	N3	chromosome_6:1711229-1712047	0.0108	0.0874	0.102	0.033	0.016	0.0218	0.046	0.0332	0.0168	0.0343	0.0196	0.022	0.0258	0.0294	0.0305	0.0321	0.0344	0.0258	0.0319	0.0297	0.0304	0.0362	0.0157	0.0316	0.0095	0.0258	0.0031
Cre06.g262950.v5.5:t:1852221-1852514	N2	chromosome_6:1851826-1852221	0.0001	0.0001	0.0001	0.0001	0.0001	0.0263	0.2855	0.1935	0.2395	0.0001	0.0001	0.1479	0.1988	0.0001	0.0001	0.0001	0.0001	0.3269	0.1812	0.0001	0.1946	0.0001	0.1935	0.1092	0.1106	0.1144	0.0001
Cre06.g263289.v5.5:s:1900150-1900280	N3	chromosome_6:1900040-1900150	0.0928	0.025	0.1113	0.0246	0.0001	0.1158	0.0651	0.0001	0.0001	0.0001	0.0001	0.0001	0.0001	0.0001	0.0001	0.0001	0.0001	0.0001	0.0001	0.0001	0.0001	0.0001	0.0001	0.0001	0.0001	0.0001	0.0001
Cre06.g263602.v5.5:s:1929928-1929996	N7	chromosome_6:1929695-1929928	0.0001	0.0001	0.0001	0.0001	0.0001	0.0001	0.0001	0.0001	0.1911	0.1251	0.0001	0.0001	0.0001	0.0001	0.0001	0.2134	0.0001	0.0001	0.0001	0.0001	0.1522	0.0001	0.2107	0.0001	0.0001	0.2445	0.0001
Cre06.g263800.v5.5:s:1956924-1957023	N6	chromosome_6:1956693-1956924	0.2754	0.2606	0.3692	0.3122	0.0794	0.3102	0.2278	0.4209	0.2345	0.216	0.2655	0.255	0.3382	0.4323	0.3652	0.2263	0.0001	0.3702	0.2607	0.0001	0.3736	0.2174	0.227	0.2105	0.3547	0.359	0.2199
Cre06.g263800.v5.5:t:1956578-1956693	N6	chromosome_6:1956693-1956924	0.267	0.2618	0.3806	0.3155	0.0739	0.3095	0.2199	0.4136	0.2351	0.2134	0.2512	0.2654	0.3354	0.4333	0.3649	0.2369	0.0001	0.3656	0.2631	0.0001	0.3773	0.2173	0.2297	0.2097	0.351	0.3489	0.2179
Cre06.g264400.v5.5:t:2037857-2038056	N3	chromosome_6:2038056-2038124	0.0665	0.0352	0.024	0.057	0.0001	0.0169	0.0186	0.0128	0.0207	0.0718	0.0684	0.0223	0.0573	0.0161	0.013	0.0067	0.0219	0.0142	0.0134	0.0184	0.025	0.0085	0.0375	0.0058	0.0339	0.0113	0.008
Cre06.g264450.v5.5:s:2039274-2039678	N3	chromosome_6:2039015-2039274	0.0314	0.0001	0.0001	0.0098	0.0001	0.0471	0.031	0.1031	0.1336	0.0214	0.0238	0.0238	0.0052	0.0534	0.0413	0.0385	0.0241	0.0144	0.0152	0.0275	0.0374	0.0074	0.0137	0.0352	0.0071	0.0043	0.0516
Cre06.g264850.v5.5:t:2062159-2062368	N3	chromosome_6:2061971-2062200	0.0001	0.0001	0.0001	0.0576	0.0001	0.0001	0.0001	0.0001	0.0001	0.0001	0.0001	0.1243	0.0671	0.1111	0.0093	0.0775	0.0001	0.0581	0.2008	0.0001	0.1185	0.0813	0.0522	0.0574	0.0094	0.0443	0.018
Cre06.g264850.v5.5:t:2066903-2067059	N3	chromosome_6:2066667-2066903	0.0001	0.0001	0.0001	0.0168	0.0001	0.0001	0.0001	0.0001	0.0311	0.0194	0.0234	0.0133	0.0149	0.0079	0.0111	0.0067	0.0139	0.1021	0.0174	0.0159	0.0145	0.0001	0.0196	0.0117	0.0115	0.0074	0.0146
Cre06.g266200.v5.5:t:2213592-2215278	N3	chromosome_6:2215278-2215589	0.0001	0.0001	0.0001	0.0001	0.0001	0.0001	0.0001	0.0001	0.0001	0.0001	0.063	0.0108	0.0001	0.0001	0.036	0.0301	0.125	0.0537	0.0595	0.0382	0.0144	0.0123	0.055	0.0694	0.1044	0.0686	0.0096
Cre06.g266800.v5.5:s:2271751-2271840	N3	chromosome_6:2271840-2271993	0.0019	0.0418	0.0239	0.0299	0.009	0.0298	0.0328	0.0064	0.0059	0.0057	0.0032	0.0192	0.0177	0.0042	0.033	0.0125	0.0591	0.0186	0.016	0.0404	0.0125	0.0264	0.0139	0.0128	0.0525	0.0426	0.0285
Cre06.g266800.v5.5:t:2271993-2272605	N3	chromosome_6:2271840-2271993	0.0018	0.0423	0.0243	0.0295	0.0089	0.0316	0.0323	0.0064	0.0062	0.0057	0.0031	0.0191	0.0183	0.0044	0.0329	0.0119	0.0585	0.0185	0.0162	0.0409	0.0124	0.0266	0.0141	0.0124	0.0527	0.0436	0.0284
Cre06.g267800.v5.5:s:2385996-2386057	N4	chromosome_6:2385844-2385996	0.1814	0.0001	0.0001	0.1209	0.0001	0.1317	0.0001	0.2118	0.1081	0.1148	0.1799	0.0863	0.1033	0.2701	0.1419	0.2511	0.3755	0.2815	0.0769	0.2031	0.2471	0.2833	0.2474	0.2853	0.2957	0.2245	0.2191
Cre06.g268700.v5.5:s:2447265-2447396	N3	chromosome_6:2447154-2447265	0.0001	0.0001	0.0001	0.0001	0.0001	0.0001	0.0001	0.0001	0.0001	0.0001	0.0001	0.2344	0.0001	0.0556	0.0837	0.2437	0.1192	0.1956	0.0883	0.0001	0.0001	0.0001	0.0001	0.0001	0.0001	0.0001	0.0001
Cre06.g268900.v5.5:t:2481915-2484625	N3	chromosome_6:2481855-2481960	0.0087	0.0001	0.0001	0.0276	0.0167	0.0144	0.0001	0.0158	0.0001	0.0001	0.0168	0.0433	0.0001	0.0001	0.0195	0.0365	0.0001	0.014	0.0435	0.0174	0.0415	0.0147	0.0636	0.0287	0.0088	0.0585	0.0068
Cre06.g269850.v5.5:t:2631376-2632838	N3	chromosome_6:2632838-2632959	0.0001	0.0001	0.0001	0.014	0.0001	0.0001	0.0001	0.0001	0.0001	0.0001	0.0001	0.1235	0.0001	0.1368	0.0205	0.0274	0.0144	0.0203	0.0393	0.0117	0.012	0.0166	0.0236	0.0208	0.0246	0.0086	0.0165
Cre06.g271050.v5.5:s:2777917-2778008	N3	chromosome_6:2777544-2777917	0.0001	0.0001	0.0001	0.0862	0.0001	0.0357	0.0001	0.0227	0.024	0.1313	0.0167	0.0292	0.0183	0.0531	0.041	0.0326	0.0089	0.1005	0.021	0.0377	0.0113	0.043	0.0283	0.0114	0.0121	0.0064	0.0152
Cre06.g271150.v5.5:t:2788738-2789062	N3	chromosome_6:2788597-2788738	0.0001	0.0455	0.0238	0.0105	0.0245	0.0186	0.0133	0.0121	0.0136	0.0121	0.0463	0.0061	0.0086	0.0055	0.0049	0.0036	0.008	0.0156	0.0552	0.0078	0.021	0.0058	0.0245	0.0198	0.0138	0.028	0.0595
Cre06.g271800.v5.5:t:2845591-2846253	N2	chromosome_6:2846253-2846563	0.0001	0.0001	0.0001	0.1529	0.0001	0.0941	0.1146	0.1809	0.1634	0.1762	0.2141	0.119	0.1639	0.1457	0.1403	0.1436	0.1199	0.1403	0.0887	0.0903	0.2212	0.1222	0.1252	0.1938	0.1733	0.12	0.1565
Cre06.g271850.v5.5:t:2851697-2851812	N3	chromosome_6:2851812-2852255	0.0085	0.0032	0.0027	0.0295	0.0052	0.003	0.0055	0.0093	0.0001	0.0001	0.012	0.0125	0.0732	0.0735	0.0545	0.055	0.0118	0.079	0.0538	0.0496	0.1226	0.0225	0.0528	0.0932	0.0691	0.0899	0.0172
Cre06.g272250.v5.5:t:2895629-2895759	N3	chromosome_6:2895733-2895985	0.0001	0.0001	0.0001	0.0001	0.0001	0.0001	0.0001	0.0001	0.0001	0.0001	0.0001	0.0001	0.0175	0.0718	0.0367	0.111	0.0514	0.0485	0.0788	0.0358	0.1884	0.1072	0.016	0.0164	0.048	0.0602	0.0001
Cre06.g272350.v5.5:s:2903379-2903700	N3	chromosome_6:2903208-2903379	0.0001	0.0001	0.0001	0.1095	0.0001	0.0001	0.0417	0.0239	0.0001	0.0001	0.0001	0.0248	0.0001	0.043	0.0178	0.0115	0.0338	0.0914	0.0316	0.0173	0.0551	0.0151	0.0408	0.0289	0.0642	0.0923	0.0746
Cre06.g272475.v5.5:s:2915352-2916036	N3	chromosome_6:2915153-2915352	0.0266	0.0001	0.0001	0.066	0.0424	0.0254	0.1138	0.0728	0.0233	0.0839	0.0111	0.0458	0.1212	0.0382	0.1059	0.0627	0.0115	0.0415	0.0673	0.0074	0.024	0.0332	0.0125	0.0603	0.0353	0.0271	0.0333
Cre06.g272550.v5.5:t:2921244-2922148	N7	chromosome_6:2920940-2921244	0.0496	0.0001	0.0229	0.0477	0.0001	0.0237	0.0894	0.0151	0.0859	0.0822	0.0738	0.0602	0.0578	0.1225	0.2266	0.1631	0.2185	0.164	0.2364	0.1088	0.1487	0.2174	0.1598	0.154	0.216	0.1349	0.1781
Cre06.g273450.v5.5:s:2995397-2995425	N3	chromosome_6:2995013-2995397	0.0001	0.0001	0.0001	0.0001	0.0001	0.0001	0.0001	0.0001	0.0001	0.0001	0.0602	0.0322	0.0083	0.0723	0.0877	0.0698	0.0574	0.0066	0.0122	0.0001	0.0001	0.0001	0.0001	0.0001	0.0001	0.0001	0.0001
Cre06.g273500.v5.5:s:2998927-2999256	N6	chromosome_6:2998837-2998927	0.5378	0.374	0.0001	0.383	0.3211	0.4264	0.5074	0.5889	0.4182	0.5	0.4848	0.4779	0.5645	0.0001	0.0001	0.2018	0.0001	0.0001	0.7173	0.0001	0.0001	0.0001	0.0001	0.0001	0.0001	0.0001	0.0001
Cre06.g274450.v5.5:t:3054812-3055867	N1	chromosome_6:3054689-3054815	0.4317	0.4982	0.3993	0.2909	0.3872	0.4886	0.4231	0.5097	0.5409	0.5335	0.4541	0.3993	0.0001	0.488	0.0001	0.5788	0.0001	0.4417	0.3925	0.0001	0.396	0.0001	0.7753	0.6387	0.6729	0.5955	0.6114
Cre06.g275000.v5.5:t:3107734-3109347	N2	chromosome_6:3107108-3108618	0.0001	0.0001	0.0001	0.3656	0.0001	0.2453	0.1719	0.1262	0.2174	0.0963	0.2065	0.1858	0.1145	0.1368	0.1968	0.1204	0.128	0.2157	0.0994	0.1728	0.0538	0.0784	0.052	0.0001	0.0001	0.0001	0.0001
Cre06.g275100.v5.5:s:3115101-3115317	N3	chromosome_6:3115317-3115601	0.0518	0.0522	0.0308	0.0824	0.0466	0.0441	0.0352	0.0395	0.0337	0.0578	0.0495	0.0496	0.0497	0.0327	0.0588	0.0429	0.0349	0.0432	0.0471	0.0443	0.0459	0.03	0.0394	0.0265	0.0357	0.0306	0.0476
Cre06.g275100.v5.5:t:3115598-3115733	N3	chromosome_6:3115317-3115601	0.0548	0.0477	0.0313	0.0772	0.0459	0.0433	0.035	0.0394	0.0332	0.0573	0.0503	0.0491	0.0507	0.0331	0.0587	0.0447	0.0343	0.0428	0.0459	0.0457	0.0467	0.0311	0.039	0.027	0.0377	0.03	0.0471
Cre06.g276100.v5.5:t:3215994-3216071	N2	chromosome_6:3215522-3215997	0.0001	0.0001	0.0001	0.2147	0.0001	0.1737	0.0001	0.2036	0.0001	0.1482	0.2435	0.1097	0.3045	0.1713	0.0001	0.2098	0.0001	0.1431	0.2085	0.1605	0.2359	0.0758	0.1164	0.1082	0.0451	0.1049	0.1988
Cre06.g277000.v5.5:s:3274048-3274214	N3	chromosome_6:3273643-3274048	0.0712	0.0001	0.0899	0.0061	0.0706	0.0333	0.0068	0.1199	0.0274	0.0283	0.0598	0.0332	0.0312	0.0179	0.0197	0.0497	0.0717	0.0217	0.0382	0.0183	0.0864	0.043	0.046	0.0533	0.0417	0.0238	0.0051
Cre06.g277350.v5.5:t:3317998-3318507	N3	chromosome_6:3317238-3317998	0.073	0.0001	0.0001	0.0139	0.0001	0.0001	0.0001	0.012	0.0088	0.0313	0.005	0.0023	0.026	0.0079	0.0479	0.0274	0.0105	0.0055	0.0738	0.0124	0.0978	0.0093	0.043	0.008	0.0401	0.0956	0.0001
Cre06.g277801.v5.5:t:3368319-3368847	N3	chromosome_6:3368124-3368319	0.0001	0.0001	0.0001	0.0001	0.0001	0.0001	0.0001	0.0001	0.0001	0.0001	0.0001	0.0001	0.0001	0.0001	0.0001	0.0001	0.0001	0.0405	0.0001	0.0001	0.0001	0.0001	0.0001	0.0001	0.0001	0.2391	0.0001
Cre06.g278089.v5.5:s:3421912-3422013	N2	chromosome_6:3421810-3421912	0.0001	0.0001	0.0001	0.0001	0.0001	0.0001	0.3352	0.3308	0.1994	0.14	0.2509	0.2227	0.275	0.0668	0.1233	0.0001	0.0001	0.0182	0.0924	0.0001	0.0001	0.0001	0.0001	0.0001	0.0001	0.0001	0.0001
Cre06.g278095.v5.5:t:3460742-3460915	N2	chromosome_6:3460601-3460742	0.0001	0.0001	0.0001	0.0001	0.0001	0.0001	0.0001	0.0001	0.0001	0.2576	0.2321	0.2991	0.3711	0.2514	0.1147	0.1757	0.0001	0.0617	0.0923	0.0678	0.0001	0.0001	0.0001	0.0001	0.0001	0.0001	0.0001
Cre06.g278111.v5.5:s:3545525-3545812	N3	chromosome_6:3545445-3545578	0.0732	0.0411	0.0296	0.061	0.0001	0.0001	0.0001	0.0001	0.0001	0.0001	0.025	0.0247	0.0394	0.0001	0.0562	0.119	0.0831	0.1803	0.0234	0.0001	0.019	0.0176	0.0122	0.0794	0.0667	0.0193	0.0157
Cre06.g278118.v5.5:s:3566935-3567222	N4	chromosome_6:3566864-3566935	0.8003	0.0001	0.0001	0.0001	0.0001	0.0001	0.0001	0.0001	0.0001	0.0001	0.0001	0.3289	0.0001	0.0001	0.0893	0.2374	0.0001	0.0126	0.3013	0.1061	0.5648	0.0001	0.3221	0.0001	0.5387	0.6773	0.5464
Cre06.g278118.v5.5:t:3566935-3567222	N3	chromosome_6:3567204-3567315	0.0001	0.0001	0.0001	0.0001	0.0001	0.0001	0.0001	0.0001	0.0001	0.0001	0.0001	0.1674	0.0001	0.0001	0.0001	0.1504	0.0001	0.0001	0.0127	0.0001	0.0001	0.0001	0.1153	0.0001	0.0001	0.2461	0.0001
Cre06.g278134.v5.5:s:3660225-3660502	N3	chromosome_6:3660170-3660225	0.0001	0.0001	0.0001	0.0001	0.0001	0.0001	0.0001	0.0001	0.0001	0.0001	0.0001	0.0001	0.0001	0.0001	0.1115	0.0001	0.0001	0.0001	0.0001	0.0001	0.0001	0.0001	0.3604	0.0001	0.0001	0.0001	0.0001
Cre06.g278137.v5.5:t:3671886-3673310	N3	chromosome_6:3671544-3671886	0.0001	0.0001	0.0001	0.0001	0.0001	0.0001	0.0001	0.0001	0.0001	0.0001	0.0089	0.0367	0.0159	0.0211	0.1164	0.0742	0.1615	0.1231	0.1113	0.0128	0.0001	0.0001	0.0369	0.0001	0.0001	0.012	0.0001
Cre06.g278150.v5.5:s:4802941-4803033	N3	chromosome_6:4802515-4802941	0.0001	0.0001	0.0682	0.0049	0.0166	0.0395	0.0213	0.0438	0.0077	0.0322	0.0102	0.0045	0.0173	0.01	0.0665	0.0343	0.0143	0.0679	0.0069	0.0101	0.0082	0.0094	0.0145	0.0066	0.0068	0.0232	0.0071
Cre06.g278166.v5.5:s:3807472-3807870	N3	chromosome_6:3807870-3807977	0.0001	0.0001	0.0001	0.0001	0.0001	0.1291	0.1732	0.1014	0.0001	0.1389	0.1941	0.0928	0.0431	0.0001	0.0001	0.0001	0.0001	0.0001	0.0001	0.0001	0.0001	0.0001	0.0001	0.0001	0.0001	0.0001	0.0001
Cre06.g278168.v5.5:s:3817115-3817215	N3	chromosome_6:3816965-3817115	0.054	0.0201	0.0057	0.0119	0.002	0.0066	0.0066	0.006	0.016	0.0139	0.0143	0.0117	0.025	0.0078	0.0368	0.0011	0.0133	0.0079	0.002	0.0029	0.0028	0.0039	0.0246	0.0059	0.0295	0.0269	0.0001
Cre06.g278176.v5.5:s:3861440-3861501	N3	chromosome_6:3861501-3862127	0.0001	0.0001	0.0001	0.0001	0.0001	0.0001	0.0001	0.0001	0.0001	0.0001	0.0001	0.1175	0.0001	0.0369	0.1145	0.0434	0.0001	0.0495	0.1185	0.0434	0.0532	0.0634	0.0582	0.0556	0.0659	0.0946	0.1361
Cre06.g278176.v5.5:t:3861138-3861332	N3	chromosome_6:3860968-3861148	0.0001	0.0001	0.0001	0.0001	0.0001	0.0336	0.0001	0.0001	0.0649	0.0316	0.0146	0.0258	0.016	0.1082	0.1276	0.0948	0.0293	0.0132	0.1261	0.0298	0.0718	0.0588	0.0665	0.1174	0.081	0.0916	0.0883
Cre06.g278176.v5.5:t:3862127-3862215	N3	chromosome_6:3861501-3862127	0.0001	0.0001	0.0001	0.0001	0.0001	0.0001	0.0001	0.0001	0.0001	0.0001	0.0001	0.1098	0.0001	0.0381	0.1045	0.0461	0.0001	0.0532	0.0859	0.0703	0.0323	0.0681	0.0528	0.0496	0.0622	0.0899	0.1669
Cre06.g278178.v5.5:t:3886219-3886253	N3	chromosome_6:3886019-3886219	0.1431	0.0149	0.0127	0.0104	0.0001	0.0295	0.0001	0.0633	0.0126	0.0083	0.0344	0.0058	0.0137	0.0104	0.0075	0.0037	0.0051	0.0007	0.0059	0.0059	0.0023	0.008	0.0013	0.0084	0.0032	0.01	0.0185
Cre06.g278184.v5.5:s:3918766-3919058	N3	chromosome_6:3919058-3919517	0.0022	0.0062	0.0266	0.0201	0.006	0.0363	0.0032	0.0035	0.0055	0.0322	0.0654	0.034	0.03	0.0295	0.0478	0.0259	0.0054	0.0841	0.1511	0.0579	0.1758	0.1187	0.0317	0.0266	0.0034	0.046	0.0743
Cre06.g278184.v5.5:t:3919517-3921463	N7	chromosome_6:3919058-3919517	0.0092	0.0185	0.0351	0.0221	0.0182	0.0557	0.0127	0.0092	0.0158	0.0721	0.0776	0.0308	0.0387	0.0366	0.0553	0.032	0.0237	0.1065	0.1595	0.0782	0.2419	0.1262	0.0482	0.0404	0.0219	0.0883	0.0898
Cre06.g278186.v5.5:s:3928739-3928808	N3	chromosome_6:3928136-3928739	0.0001	0.0001	0.0001	0.0001	0.0001	0.0001	0.0001	0.0001	0.0001	0.0001	0.0001	0.0798	0.0001	0.0301	0.1824	0.0264	0.1131	0.0206	0.0324	0.0503	0.0697	0.0453	0.01	0.0119	0.0428	0.046	0.0751
Cre06.g278186.v5.5:t:3927585-3928136	N3	chromosome_6:3928136-3928739	0.0001	0.0001	0.0001	0.0001	0.0001	0.0001	0.0001	0.0001	0.0001	0.0001	0.0001	0.0822	0.0001	0.0001	0.1882	0.023	0.1255	0.0076	0.037	0.0446	0.052	0.0484	0.0052	0.006	0.0261	0.033	0.1078
Cre06.g278186.v5.5:t:3931877-3931991	N3	chromosome_6:3931991-3932157	0.0001	0.0001	0.0001	0.0001	0.0001	0.0001	0.0001	0.0001	0.0001	0.0001	0.0001	0.1172	0.0001	0.0219	0.0174	0.0238	0.0496	0.0103	0.0591	0.1173	0.0148	0.1842	0.0085	0.0671	0.0783	0.0438	0.054
Cre06.g278189.v5.5:t:3948102-3948218	N6	chromosome_6:3947708-3948102	0.0001	0.0001	0.0001	0.0001	0.0001	0.0001	0.7785	0.0001	0.0001	0.0001	0.5321	0.6485	0.4028	0.6632	0.0001	0.4338	0.0001	0.649	0.0001	0.0001	0.3095	0.0001	0.3466	0.285	0.2985	0.3394	0.0001
Cre06.g278192.v5.5:t:3964946-3965074	N3	chromosome_6:3964708-3964954	0.0611	0.0141	0.0156	0.0403	0.0001	0.0001	0.0126	0.01	0.0001	0.0065	0.0044	0.004	0.0428	0.0064	0.0318	0.0859	0.0079	0.0419	0.0396	0.0757	0.0504	0.0001	0.0977	0.0402	0.006	0.0666	0.0001
Cre06.g278197.v5.5:s:3984985-3985065	N6	chromosome_6:3984820-3984985	0.0001	0.0001	0.0001	0.3198	0.0001	0.0001	0.0001	0.0001	0.4327	0.3689	0.4464	0.3773	0.4024	0.3597	0.3911	0.2425	0.0001	0.3468	0.1882	0.0001	0.0001	0.0001	0.4048	0.25	0.0001	0.195	0.3621
Cre06.g278197.v5.5:s:3988176-3988234	N3	chromosome_6:3988095-3988176	0.0001	0.0001	0.0001	0.0306	0.0001	0.0001	0.0001	0.0323	0.0103	0.0289	0.0294	0.0402	0.0044	0.0588	0.0112	0.0201	0.0539	0.0062	0.0119	0.0146	0.1111	0.0705	0.1196	0.0667	0.043	0.0246	0.0104
Cre06.g278223.v5.5:t:4123396-4123836	N7	chromosome_6:4123836-4124432	0.147	0.0857	0.0832	0.0806	0.0001	0.1237	0.0001	0.0001	0.0001	0.0001	0.0425	0.0335	0.013	0.0001	0.0001	0.0748	0.0001	0.0664	0.0899	0.1026	0.097	0.0001	0.143	0.0432	0.0834	0.2229	0.2554
Cre06.g278230.v5.5:t:4165685-4166446	N4	chromosome_6:4165546-4165888	0.2609	0.0001	0.0001	0.1352	0.0001	0.1932	0.1943	0.0001	0.0001	0.0001	0.0001	0.1916	0.0001	0.1257	0.0001	0.2386	0.1923	0.0001	0.4317	0.0001	0.2106	0.0001	0.294	0.0897	0.2842	0.3038	0.2927
Cre06.g278233.v5.5:t:4195408-4196381	N3	chromosome_6:4195230-4195408	0.0522	0.0742	0.0167	0.0076	0.0001	0.0001	0.0518	0.0303	0.0001	0.0001	0.0638	0.0081	0.0001	0.0145	0.0084	0.0223	0.0145	0.1044	0.0407	0.0868	0.0311	0.0708	0.0094	0.0095	0.0107	0.0801	0.0001
Cre06.g278239.v5.5:s:4223758-4223909	N5	chromosome_6:4223586-4223758	0.2683	0.0299	0.0673	0.0768	0.2996	0.2111	0.2667	0.2506	0.2735	0.2131	0.1689	0.1421	0.1619	0.066	0.2045	0.2709	0.4819	0.4573	0.6052	0.6226	0.7522	0.8363	0.8403	0.8939	0.8885	0.73	0.8789
Cre06.g278244.v5.5:t:4243890-4243941	N2	chromosome_6:4243689-4243890	0.0001	0.0001	0.0001	0.0001	0.0001	0.0001	0.0001	0.0001	0.0001	0.1276	0.1085	0.2677	0.3026	0.2917	0.2085	0.3086	0.0001	0.4088	0.4186	0.0001	0.0001	0.0001	0.2482	0.0001	0.14	0.1277	0.0001
Cre06.g278250.v5.5:s:4826007-4826128	N3	chromosome_6:4825942-4826100	0.0001	0.0001	0.0001	0.0001	0.0001	0.0001	0.0001	0.0001	0.0001	0.048	0.0081	0.0203	0.0064	0.0404	0.0427	0.1356	0.0702	0.0104	0.0852	0.0664	0.0001	0.0001	0.0001	0.0001	0.0001	0.0001	0.0001
Cre06.g278269.v5.5:t:4385318-4385457	N3	chromosome_6:4385421-4385880	0.0001	0.0001	0.0001	0.0001	0.0001	0.0001	0.0001	0.0001	0.0169	0.0001	0.0068	0.0869	0.0451	0.0068	0.0001	0.1292	0.0001	0.1075	0.0158	0.0001	0.0001	0.0001	0.0166	0.0001	0.0001	0.0001	0.0001
Cre06.g278292.v5.5:s:4712997-4713343	N3	chromosome_6:4712856-4712997	0.059	0.0001	0.0001	0.0834	0.0001	0.0001	0.0001	0.0001	0.0001	0.0001	0.0001	0.0001	0.0001	0.0001	0.0001	0.0001	0.105	0.1146	0.0001	0.0001	0.0387	0.0595	0.0863	0.0072	0.058	0.0817	0.0286
Cre06.g278292.v5.5:t:4709986-4710388	N7	chromosome_6:4710388-4710963	0.0001	0.0001	0.0001	0.0001	0.0001	0.0001	0.0001	0.0001	0.0001	0.0001	0.0001	0.0001	0.0001	0.0001	0.0001	0.0001	0.0001	0.0001	0.268	0.0001	0.1051	0.0001	0.1449	0.1005	0.1333	0.1867	0.0858
Cre06.g278292.v5.5:t:4710963-4711479	N3	chromosome_6:4711086-4712268	0.0313	0.0001	0.0001	0.075	0.0001	0.0389	0.0001	0.029	0.0001	0.0001	0.0001	0.0421	0.0001	0.0001	0.0001	0.0001	0.0001	0.0591	0.1172	0.056	0.0753	0.0437	0.0399	0.0813	0.0878	0.0522	0.061
Cre06.g278293.v5.5:s:4712997-4713051	N3	chromosome_6:4712856-4712997	0.0598	0.0001	0.0001	0.0834	0.0001	0.0001	0.0001	0.0001	0.0001	0.0001	0.0001	0.0001	0.0001	0.0001	0.0001	0.0001	0.1035	0.1121	0.0001	0.0001	0.0387	0.0595	0.0848	0.0072	0.0573	0.0804	0.0283
Cre06.g278293.v5.5:t:4709986-4710388	N7	chromosome_6:4710388-4710963	0.0001	0.0001	0.0001	0.0001	0.0001	0.0001	0.0001	0.0001	0.0001	0.0001	0.0001	0.0001	0.0001	0.0001	0.0001	0.0001	0.0001	0.0001	0.271	0.0001	0.1061	0.0001	0.1442	0.1018	0.1338	0.1877	0.0851
Cre06.g278293.v5.5:t:4710963-4711479	N3	chromosome_6:4711086-4712268	0.0312	0.0001	0.0001	0.0759	0.0001	0.0371	0.0001	0.0294	0.0001	0.0001	0.0001	0.0405	0.0001	0.0001	0.0001	0.0001	0.0001	0.0609	0.1172	0.0556	0.0753	0.044	0.0399	0.0799	0.0851	0.0513	0.0628
Cre06.g279150.v5.5:s:4892443-4892555	N3	chromosome_6:4892555-4893061	0.0105	0.0048	0.008	0.007	0.0182	0.0208	0.0101	0.0188	0.0101	0.0194	0.0036	0.0242	0.0143	0.0015	0.0043	0.0114	0.0071	0.0197	0.0861	0.034	0.1241	0.0311	0.0264	0.0327	0.0257	0.034	0.0362
Cre06.g279150.v5.5:t:4893689-4893828	N3	chromosome_6:4893060-4893689	0.0296	0.0289	0.0325	0.0365	0.1072	0.0371	0.0274	0.0389	0.023	0.0374	0.0443	0.0359	0.031	0.0059	0.0297	0.0198	0.0279	0.0207	0.0282	0.0087	0.0539	0.0313	0.0067	0.056	0.0442	0.033	0.0371
Cre06.g279474.v5.5:s:4929128-4929276	N3	chromosome_6:4928838-4929128	0.0498	0.0001	0.0001	0.0094	0.0001	0.0152	0.0001	0.0875	0.0209	0.013	0.0343	0.0038	0.0129	0.0117	0.0074	0.0332	0.0119	0.0044	0.0058	0.0651	0.0077	0.0063	0.0529	0.0263	0.0451	0.0403	0.0359
Cre06.g279900.v5.5:t:4975538-4975678	N3	chromosome_6:4975483-4975538	0.0001	0.0001	0.0001	0.0448	0.0001	0.0001	0.0001	0.1526	0.0001	0.0833	0.0178	0.1116	0.0127	0.0597	0.0565	0.008	0.0785	0.0152	0.0335	0.016	0.0139	0.0268	0.0303	0.0212	0.1054	0.0638	0.0001
Cre06.g279950.v5.5:t:4984143-4984304	N3	chromosome_6:4984180-4984389	0.0144	0.0001	0.0001	0.1532	0.0001	0.0001	0.0001	0.1415	0.0001	0.0001	0.0101	0.0111	0.0001	0.1009	0.0001	0.1032	0.0001	0.0626	0.0111	0.0426	0.0615	0.0365	0.1037	0.1414	0.0316	0.0462	0.1048
Cre06.g279976.v5.5:s:4985827-4985956	N3	chromosome_6:4985658-4985827	0.0001	0.0001	0.0001	0.0001	0.0001	0.0001	0.0001	0.0001	0.0001	0.0001	0.0001	0.0001	0.0001	0.0896	0.0001	0.0001	0.0001	0.253	0.0001	0.0001	0.0001	0.0001	0.1316	0.0001	0.0001	0.093	0.2601
Cre06.g280000.v5.5:t:4996974-4997799	N3	chromosome_6:4996799-4997154	0.0001	0.0001	0.0001	0.0001	0.0001	0.0001	0.0001	0.0001	0.0001	0.0001	0.0001	0.0001	0.0001	0.0001	0.0001	0.0001	0.0001	0.2748	0.468	0.0001	0.0001	0.0001	0.0001	0.0001	0.0001	0.0001	0.0001
Cre06.g280500.v5.5:s:5074711-5074826	N4	chromosome_6:5074581-5074711	0.2643	0.0001	0.1967	0.0871	0.0001	0.1273	0.0001	0.0834	0.0204	0.0277	0.1043	0.0949	0.1087	0.0001	0.2036	0.3221	0.0001	0.2853	0.2132	0.1164	0.1704	0.1924	0.1425	0.0954	0.1521	0.241	0.1396
Cre06.g280750.v5.5:s:5089851-5090015	N3	chromosome_6:5089759-5089851	0.0001	0.0001	0.0001	0.0001	0.0001	0.0001	0.0001	0.0001	0.0001	0.0623	0.1083	0.0178	0.005	0.0152	0.0042	0.0109	0.0086	0.0509	0.0182	0.0081	0.0133	0.0001	0.0129	0.0001	0.0336	0.0001	0.0001
Cre06.g280900.v5.5:t:5095476-5095536	N1	chromosome_6:5095389-5095479	0.3953	0.325	0.2736	0.5386	0.383	0.3991	0.5366	0.3749	0.417	0.427	0.3713	0.4466	0.4914	0.3617	0.4253	0.4029	0.414	0.2891	0.356	0.32	0.4103	0.5627	0.4415	0.4616	0.356	0.3806	0.4351
Cre06.g280900.v5.5:t:5095838-5095990	N1	chromosome_6:5095723-5095838	0.5498	0.0001	0.0001	0.5471	0.3675	0.5096	0.4832	0.3718	0.3568	0.3579	0.5989	0.4689	0.4363	0.5086	0.4103	0.547	0.4072	0.4083	0.5163	0.4404	0.3542	0.4357	0.5204	0.3649	0.3944	0.4615	0.4432
Cre06.g281766.v5.5:t:5194894-5195153	N3	chromosome_6:5194784-5194919	0.0001	0.0001	0.0001	0.0001	0.0001	0.0001	0.0001	0.0001	0.0001	0.0001	0.0866	0.0623	0.0774	0.0081	0.0156	0.0621	0.0001	0.0199	0.0672	0.0001	0.0001	0.0001	0.0001	0.0001	0.0001	0.0001	0.0001
Cre06.g281850.v5.5:t:5202804-5203493	N3	chromosome_6:5202393-5202804	0.0046	0.0067	0.035	0.0361	0.0285	0.0347	0.0208	0.0435	0.05	0.0025	0.011	0.0701	0.0174	0.0201	0.0419	0.0316	0.0481	0.0359	0.0226	0.0247	0.0564	0.0274	0.0273	0.0262	0.0391	0.0144	0.0025
Cre06.g282000.v5.5:s:5214784-5215015	N5	chromosome_6:5215015-5215816	0.0001	0.0001	0.1681	0.1711	0.1144	0.0944	0.1055	0.0905	0.0473	0.1123	0.0786	0.1293	0.0001	0.0001	0.0001	0.0001	0.0001	0.6788	0.0001	0.0001	0.9682	0.8957	0.0001	0.8886	0.8509	0.8513	0.7948
Cre06.g282000.v5.5:t:5214461-5214564	N4	chromosome_6:5213964-5214467	0.0444	0.1026	0.0779	0.0814	0.1528	0.1631	0.1076	0.1199	0.1023	0.1169	0.0691	0.0671	0.0742	0.1983	0.1791	0.186	0.0001	0.2137	0.2079	0.1593	0.3047	0.2329	0.2231	0.2284	0.3004	0.3165	0.2404
Cre06.g284850.v5.5:s:5505917-5505977	N3	chromosome_6:5505436-5505917	0.0001	0.0001	0.0001	0.0001	0.0001	0.0001	0.0001	0.0001	0.0001	0.1451	0.1468	0.119	0.0663	0.0098	0.141	0.0091	0.0621	0.0434	0.0454	0.0001	0.0001	0.0001	0.0001	0.0001	0.0001	0.0001	0.0001
Cre06.g284850.v5.5:t:5505285-5505436	N3	chromosome_6:5505436-5505917	0.0001	0.0001	0.0001	0.0001	0.0001	0.0001	0.0001	0.0001	0.0001	0.0864	0.1196	0.0897	0.0453	0.0062	0.0917	0.007	0.0469	0.0326	0.0341	0.0001	0.0001	0.0001	0.0001	0.0001	0.0001	0.0001	0.0001
Cre06.g285001.v5.5:s:5526453-5526558	N3	chromosome_6:5526558-5528311	0.0001	0.0001	0.0001	0.0001	0.0001	0.0001	0.0001	0.0001	0.0822	0.0001	0.0001	0.0167	0.0001	0.0001	0.0001	0.0001	0.0001	0.0001	0.0001	0.0001	0.0131	0.1184	0.106	0.0796	0.0753	0.1038	0.0875
Cre06.g285001.v5.5:t:5528311-5528505	N3	chromosome_6:5526558-5528311	0.0001	0.0001	0.0001	0.0001	0.0001	0.0001	0.0001	0.0001	0.0844	0.0001	0.0001	0.0203	0.0001	0.0001	0.0001	0.0001	0.0001	0.0001	0.0001	0.0001	0.0176	0.1228	0.1087	0.083	0.0781	0.1062	0.0894
Cre06.g285300.v5.5:t:5555773-5555892	N7	chromosome_6:5555511-5555773	0.1952	0.0001	0.0001	0.0967	0.0001	0.053	0.0143	0.0375	0.0884	0.0141	0.0702	0.016	0.0604	0.0129	0.0175	0.0087	0.0001	0.0416	0.1405	0.0946	0.0707	0.0688	0.0573	0.0438	0.0105	0.1844	0.0885
Cre06.g286050.v5.5:s:5641299-5641385	N3	chromosome_6:5641385-5641640	0.1304	0.0192	0.0184	0.0753	0.0001	0.0584	0.0598	0.0923	0.025	0.0001	0.0001	0.0302	0.1037	0.0263	0.0153	0.0126	0.025	0.0441	0.0623	0.0207	0.025	0.0001	0.0226	0.0226	0.0949	0.1188	0.0789
Cre06.g286150.v5.5:t:5650629-5652007	N2	chromosome_6:5650437-5650629	0.0001	0.0001	0.0001	0.0001	0.0001	0.0001	0.0001	0.1121	0.0001	0.1307	0.1313	0.1144	0.2298	0.1154	0.1413	0.0913	0.0001	0.1685	0.1573	0.1248	0.1714	0.0001	0.2204	0.0001	0.0001	0.0989	0.0001
Cre06.g286450.v5.5:t:5682432-5682518	N3	chromosome_6:5682518-5682809	0.0502	0.1162	0.1107	0.0686	0.1498	0.1417	0.0194	0.0594	0.0737	0.0635	0.0963	0.0322	0.0285	0.006	0.0093	0.0051	0.0224	0.0256	0.0418	0.0069	0.022	0.0269	0.0139	0.0046	0.0041	0.0162	0.0033
Cre06.g286700.v5.5:s:5710099-5710316	N3	chromosome_6:5709614-5710099	0.0001	0.0001	0.0001	0.1127	0.0001	0.0789	0.0895	0.1088	0.04	0.0341	0.1289	0.0514	0.0428	0.025	0.0266	0.0063	0.0164	0.031	0.0086	0.0546	0.0093	0.0396	0.0205	0.008	0.0206	0.0178	0.0417
Cre06.g286700.v5.5:s:5710481-5710895	N3	chromosome_6:5710316-5710481	0.0001	0.0001	0.0001	0.0358	0.0001	0.0001	0.0536	0.0654	0.1124	0.0516	0.0395	0.1171	0.0599	0.0469	0.0306	0.0965	0.0577	0.0325	0.0286	0.0456	0.01	0.0756	0.0357	0.1005	0.0709	0.0483	0.0078
Cre06.g286700.v5.5:t:5709549-5709614	N3	chromosome_6:5709614-5710099	0.0001	0.0001	0.0001	0.1042	0.0001	0.0513	0.0718	0.0829	0.0364	0.0337	0.0978	0.0492	0.0459	0.0212	0.0221	0.0051	0.0186	0.0314	0.0082	0.0444	0.0082	0.037	0.016	0.0073	0.0207	0.017	0.0418
Cre06.g286850.v5.5:t:5719717-5719796	N7	chromosome_6:5719796-5719857	0.0001	0.0001	0.0001	0.0001	0.0001	0.0001	0.0001	0.0001	0.0001	0.0001	0.0001	0.0053	0.0349	0.0875	0.0903	0.1034	0.124	0.1026	0.1125	0.1958	0.033	0.0857	0.0273	0.1534	0.0001	0.1829	0.0001
Cre06.g287050.v5.5:t:5735136-5735405	N3	chromosome_6:5734892-5735142	0.0151	0.0205	0.0092	0.043	0.0217	0.0141	0.0062	0.007	0.0811	0.0221	0.018	0.014	0.0197	0.0263	0.0001	0.0001	0.0001	0.0876	0.0001	0.065	0.0195	0.0173	0.0067	0.0584	0.1064	0.0759	0.0001
Cre06.g287750.v5.5:s:5833964-5834270	N3	chromosome_6:5833687-5833964	0.0001	0.0001	0.0001	0.0001	0.0001	0.0001	0.0001	0.0001	0.0001	0.0001	0.0001	0.0124	0.0133	0.006	0.0273	0.0546	0.0896	0.0372	0.1817	0.1105	0.0001	0.0001	0.0128	0.0001	0.2176	0.0001	0.0001
Cre06.g287850.v5.5:t:5841558-5846102	N3	chromosome_6:5841341-5841558	0.1743	0.0001	0.0001	0.0418	0.0001	0.0931	0.0863	0.0122	0.0001	0.0001	0.0001	0.1138	0.0001	0.0159	0.0001	0.0427	0.0001	0.0851	0.067	0.0529	0.0313	0.0415	0.0348	0.0555	0.048	0.0385	0.0164
Cre06.g287950.v5.5:t:5860492-5860947	N3	chromosome_6:5860204-5860492	0.0001	0.0001	0.0001	0.0001	0.0001	0.0001	0.0001	0.0001	0.0001	0.0001	0.0001	0.2396	0.0001	0.0001	0.0001	0.0001	0.0001	0.0001	0.0001	0.0001	0.0001	0.0001	0.0001	0.0001	0.0001	0.0001	0.0001
Cre06.g288650.v5.5:t:5933554-5934618	N3	chromosome_6:5933302-5933554	0.0222	0.0046	0.0282	0.018	0.0819	0.0464	0.014	0.004	0.0054	0.0066	0.0034	0.0219	0.0464	0.0067	0.0038	0.0106	0.0222	0.0177	0.0047	0.0059	0.0038	0.0052	0.0031	0.003	0.0354	0.0024	0.0048
Cre06.g289400.v5.5:t:6033134-6034413	N3	chromosome_6:6033041-6033165	0.009	0.0001	0.0196	0.0112	0.0001	0.0082	0.0001	0.0135	0.0166	0.0001	0.0115	0.0067	0.0128	0.0115	0.0076	0.0039	0.0104	0.0044	0.0074	0.0078	0.0069	0.0074	0.0528	0.0056	0.0055	0.0032	0.0069
Cre06.g289400.v5.5:t:6034597-6034845	N4	chromosome_6:6034413-6034600	0.2459	0.0001	0.0001	0.1478	0.0001	0.0001	0.0001	0.4034	0.0001	0.0001	0.3171	0.3429	0.0001	0.3509	0.3169	0.363	0.0001	0.357	0.2826	0.5968	0.3534	0.4317	0.2796	0.3708	0.4394	0.3648	0.257
Cre06.g290200.v5.5:s:6144487-6146079	N3	chromosome_6:6142984-6144487	0.0951	0.0001	0.0001	0.0417	0.0001	0.0001	0.0001	0.0001	0.0001	0.0001	0.0001	0.1079	0.0001	0.0001	0.0249	0.0469	0.0001	0.0789	0.0255	0.0001	0.0252	0.0602	0.0118	0.0113	0.0106	0.0087	0.0103
Cre06.g290200.v5.5:t:6142868-6142984	N3	chromosome_6:6142984-6144487	0.1435	0.0001	0.0001	0.0458	0.0001	0.0001	0.0001	0.0001	0.0001	0.0001	0.0001	0.0001	0.0001	0.0001	0.0001	0.0001	0.0001	0.0555	0.0001	0.0001	0.033	0.0602	0.0138	0.0127	0.0135	0.009	0.014
Cre06.g290450.v5.5:t:6177099-6177230	N3	chromosome_6:6176951-6177108	0.0353	0.0001	0.0552	0.0102	0.0239	0.0167	0.0173	0.04	0.1016	0.0581	0.0125	0.0204	0.0136	0.0136	0.0553	0.028	0.0629	0.0118	0.0484	0.0296	0.0078	0.019	0.014	0.0158	0.0522	0.0204	0.0388
Cre06.g290900.v5.5:t:6245848-6245961	N3	chromosome_6:6245638-6245878	0.0044	0.0001	0.0001	0.0065	0.0157	0.0076	0.0132	0.0047	0.0769	0.0263	0.0163	0.017	0.0612	0.056	0.0336	0.0377	0.0184	0.0208	0.04	0.0329	0.0395	0.0617	0.0354	0.0739	0.0719	0.026	0.0043
Cre06.g291050.v5.5:s:6259611-6259774	N7	chromosome_6:6259456-6259623	0.1238	0.0001	0.0001	0.3735	0.0001	0.0001	0.0001	0.0001	0.0001	0.0001	0.0001	0.0001	0.0001	0.0001	0.2161	0.1913	0.0001	0.211	0.2476	0.0001	0.0001	0.1792	0.3934	0.0001	0.1087	0.2622	0.0001
Cre06.g291600.v5.5:s:6302826-6303047	N2	chromosome_6:6303047-6303317	0.0001	0.0001	0.1585	0.116	0.0001	0.1624	0.0429	0.0831	0.2134	0.1598	0.1211	0.29	0.1023	0.0442	0.0088	0.0309	0.0738	0.0305	0.0955	0.0408	0.1782	0.1311	0.1162	0.0767	0.0887	0.1039	0.028
Cre06.g291600.v5.5:t:6303834-6303923	N3	chromosome_6:6303328-6303834	0.0001	0.0001	0.1375	0.0898	0.0001	0.0753	0.0381	0.0332	0.1312	0.1546	0.0685	0.078	0.0866	0.0301	0.0058	0.0217	0.0291	0.0159	0.0661	0.0361	0.0831	0.1006	0.0797	0.0702	0.0496	0.0531	0.0185
Cre06.g291850.v5.5:s:6329953-6330151	N6	chromosome_6:6329584-6329953	0.2276	0.4233	0.2166	0.3285	0.291	0.2618	0.2377	0.2923	0.2392	0.2327	0.2434	0.2773	0.1719	0.3718	0.2021	0.199	0.2715	0.2214	0.228	0.2225	0.2289	0.2961	0.2333	0.2575	0.2292	0.2983	0.2931
Cre06.g291850.v5.5:s:6330712-6331129	N6	chromosome_6:6330484-6330712	0.5068	0.0001	0.0001	0.3758	0.0001	0.2606	0.3177	0.5298	0.5166	0.3081	0.4414	0.4571	0.0001	0.0001	0.4386	0.3626	0.0001	0.0001	0.34	0.3602	0.0001	0.433	0.4054	0.3652	0.3018	0.3371	0.0956
Cre06.g291850.v5.5:t:6329253-6329315	N1	chromosome_6:6329315-6329546	0.3502	0.511	0.3609	0.3715	0.3624	0.2878	0.3549	0.3194	0.3671	0.342	0.3473	0.3267	0.3147	0.4146	0.3106	0.3249	0.2516	0.3571	0.3318	0.3459	0.3264	0.3631	0.2857	0.3991	0.3081	0.4039	0.4279
Cre06.g292400.v5.5:t:6423932-6424598	N2	chromosome_6:6423523-6423932	0.1859	0.1479	0.1263	0.1951	0.135	0.1582	0.1552	0.1293	0.1636	0.1023	0.2627	0.2366	0.2137	0.1636	0.208	0.094	0.0667	0.0595	0.0319	0.0913	0.0669	0.111	0.0757	0.0852	0.093	0.0752	0.072
Cre06.g292450.v5.5:s:6428091-6428166	N3	chromosome_6:6427887-6428154	0.0001	0.0001	0.0001	0.0001	0.0001	0.0001	0.0001	0.0001	0.0001	0.0001	0.0001	0.0167	0.0001	0.0001	0.0202	0.0537	0.0996	0.1055	0.013	0.1402	0.0264	0.1606	0.116	0.0001	0.0001	0.0001	0.0001
Cre06.g292500.v5.5:s:6429343-6429403	N6	chromosome_6:6429403-6429822	0.0001	0.0001	0.0001	0.2343	0.4108	0.203	0.1551	0.2312	0.1907	0.2361	0.2483	0.315	0.3148	0.2661	0.2228	0.1872	0.21	0.3355	0.232	0.1951	0.2316	0.2535	0.2538	0.2123	0.2352	0.2916	0.2828
Cre06.g292500.v5.5:t:6431069-6431139	N6	chromosome_6:6429927-6431069	0.0001	0.0001	0.0001	0.1978	0.1417	0.1906	0.2487	0.2775	0.269	0.2257	0.2437	0.2467	0.2664	0.2232	0.1633	0.2006	0.1923	0.2202	0.2124	0.2452	0.2139	0.2891	0.283	0.1972	0.1913	0.2813	0.0001
Cre06.g293350.v5.5:s:6539076-6539130	N3	chromosome_6:6538922-6539076	0.0001	0.0001	0.0001	0.0001	0.0001	0.0001	0.0001	0.0001	0.0001	0.0001	0.0001	0.0421	0.0001	0.0001	0.0001	0.0882	0.0001	0.0663	0.0001	0.0001	0.0001	0.0001	0.2507	0.0001	0.0001	0.1885	0.0001
Cre06.g293362.v5.5:s:6543356-6543382	N3	chromosome_6:6543220-6543356	0.0001	0.0001	0.0001	0.0001	0.0001	0.0001	0.0001	0.0001	0.0001	0.0001	0.0001	0.3076	0.0001	0.0001	0.0001	0.0001	0.0001	0.0001	0.0001	0.0001	0.0001	0.0001	0.0001	0.0001	0.0001	0.2675	0.0001
Cre06.g293516.v5.5:t:6566005-6566178	N3	chromosome_6:6565776-6566005	0.0399	0.0424	0.1471	0.0504	0.0001	0.0001	0.0001	0.0001	0.0001	0.0001	0.0001	0.091	0.1834	0.1946	0.0001	0.0996	0.0001	0.0918	0.0001	0.0001	0.0235	0.0641	0.1113	0.1739	0.0481	0.1047	0.0001
Cre06.g293750.v5.5:s:6620090-6620299	N4	chromosome_6:6619893-6620090	0.0942	0.0001	0.0001	0.0001	0.0001	0.0001	0.0833	0.2398	0.1538	0.1525	0.1532	0.1733	0.1766	0.2058	0.1956	0.223	0.1364	0.2341	0.1261	0.2052	0.252	0.3337	0.3162	0.3042	0.1559	0.2921	0.0001
Cre06.g294050.v5.5:s:6654020-6654071	N3	chromosome_6:6653896-6654020	0.0001	0.0001	0.0001	0.0001	0.0001	0.0001	0.0001	0.0001	0.0001	0.0001	0.0001	0.1619	0.0933	0.0332	0.0001	0.1347	0.0001	0.1438	0.0001	0.0001	0.0001	0.0001	0.0001	0.0001	0.0001	0.0001	0.0001
Cre06.g294400.v5.5:t:6726435-6726613	N3	chromosome_6:6726247-6726435	0.0001	0.0001	0.0001	0.0128	0.0001	0.0179	0.0167	0.0126	0.0139	0.0161	0.0091	0.0529	0.0125	0.0099	0.0082	0.0062	0.018	0.0059	0.0087	0.0098	0.0099	0.0084	0.0059	0.0062	0.0088	0.0058	0.0101
Cre06.g295600.v5.5:t:6879909-6880074	N7	chromosome_6:6879831-6879909	0.0426	0.0747	0.0858	0.0558	0.0371	0.0764	0.0204	0.0998	0.0215	0.0045	0.0505	0.0121	0.0222	0.028	0.0425	0.0747	0.0927	0.0389	0.072	0.1342	0.1414	0.1034	0.1297	0.1622	0.1434	0.0985	0.1577
Cre06.g296150.v5.5:s:6938523-6938681	N3	chromosome_6:6938681-6939201	0.0156	0.0001	0.0001	0.008	0.0001	0.0132	0.0001	0.0001	0.0123	0.0084	0.0063	0.0163	0.0241	0.0062	0.0074	0.0051	0.0131	0.0447	0.0073	0.0104	0.0108	0.0068	0.041	0.1038	0.097	0.0126	0.0273
Cre06.g296200.v5.5:s:6944122-6944200	N3	chromosome_6:6944200-6944343	0.0147	0.0001	0.0241	0.0263	0.017	0.0128	0.0303	0.0565	0.0684	0.0185	0.0194	0.0089	0.0167	0.0428	0.0957	0.0146	0.0001	0.0001	0.0729	0.0253	0.0219	0.0138	0.0133	0.0996	0.0636	0.085	0.0198
Cre06.g296300.v5.5:s:6959773-6960036	N4	chromosome_6:6959536-6959773	0.0001	0.0001	0.0001	0.0001	0.0001	0.0001	0.0001	0.0001	0.0001	0.0001	0.0001	0.0001	0.5757	0.5803	0.4464	0.4683	0.0001	0.338	0.3751	0.4222	0.3871	0.0001	0.5312	0.0001	0.0001	0.0001	0.0001
Cre06.g296450.v5.5:s:6975049-6975328	N3	chromosome_6:6974533-6975199	0.0001	0.0001	0.0001	0.3002	0.0001	0.0001	0.0001	0.0001	0.0001	0.0001	0.0001	0.0001	0.0001	0.0001	0.0001	0.0001	0.0001	0.0001	0.0001	0.0001	0.0001	0.0001	0.0001	0.0001	0.0001	0.0001	0.0001
Cre06.g296650.v5.5:s:6998515-6998636	N4	chromosome_6:6998201-6998523	0.0001	0.0001	0.1589	0.1157	0.0001	0.0001	0.0001	0.0933	0.0808	0.1139	0.1264	0.1238	0.121	0.1209	0.2191	0.1842	0.1674	0.226	0.1869	0.1398	0.1171	0.1404	0.1566	0.1425	0.141	0.2516	0.2642
Cre06.g296650.v5.5:t:6997726-6998243	N4	chromosome_6:6998201-6998523	0.0001	0.0001	0.0001	0.3496	0.0001	0.0001	0.0001	0.0001	0.1494	0.2198	0.2903	0.2358	0.2447	0.214	0.3505	0.327	0.3208	0.3907	0.3564	0.2201	0.1996	0.2882	0.3403	0.2751	0.2745	0.4341	0.494
Cre06.g297016.v5.5:s:7076086-7076196	N3	chromosome_6:7075442-7076086	0.0313	0.0001	0.0001	0.0119	0.0455	0.0201	0.0225	0.0155	0.0145	0.0251	0.0132	0.0072	0.0167	0.0409	0.0183	0.0157	0.0001	0.0171	0.0157	0.0789	0.0691	0.0533	0.0514	0.0298	0.0622	0.0625	0.014
Cre06.g297016.v5.5:t:7074959-7075110	N3	chromosome_6:7075110-7075443	0.0749	0.0001	0.0001	0.0307	0.1111	0.0133	0.0144	0.0104	0.0381	0.0165	0.1025	0.0047	0.0111	0.036	0.111	0.0693	0.0001	0.0756	0.0688	0.1572	0.0643	0.0124	0.0205	0.0258	0.0796	0.0619	0.036
Cre06.g297082.v5.5:s:7099699-7099908	N3	chromosome_6:7097116-7099699	0.0001	0.0001	0.0001	0.0001	0.0001	0.0001	0.0001	0.0001	0.0001	0.0001	0.0001	0.0742	0.0001	0.0001	0.0001	0.0001	0.0001	0.0196	0.0001	0.0001	0.0739	0.0788	0.0135	0.0001	0.0001	0.1883	0.0001
Cre06.g297082.v5.5:t:7095235-7096634	N3	chromosome_6:7096631-7097057	0.0001	0.0001	0.0001	0.0001	0.0001	0.0001	0.0001	0.0001	0.0001	0.0001	0.0001	0.0001	0.0001	0.0001	0.0001	0.0001	0.0001	0.0001	0.0001	0.0001	0.0001	0.0001	0.0001	0.0001	0.0001	0.1667	0.0001
Cre06.g297600.v5.5:s:7151636-7151813	N3	chromosome_6:7151555-7151636	0.0001	0.0001	0.0001	0.0259	0.0001	0.0159	0.0156	0.009	0.0098	0.0157	0.1048	0.0076	0.0199	0.0145	0.0128	0.0079	0.0253	0.0114	0.0122	0.0151	0.0144	0.0155	0.0055	0.0111	0.0101	0.0082	0.0191
Cre06.g297904.v5.5:t:7218509-7219048	N3	chromosome_6:7219048-7219175	0.0001	0.0001	0.0001	0.1021	0.0001	0.0001	0.0001	0.0001	0.0001	0.0001	0.0001	0.168	0.0001	0.0001	0.0001	0.0001	0.0001	0.0001	0.0001	0.0001	0.0001	0.0001	0.0223	0.0001	0.0001	0.0001	0.0001
Cre06.g299200.v5.5:s:7372707-7372910	N3	chromosome_6:7372910-7373230	0.0748	0.0001	0.0001	0.0087	0.0001	0.0177	0.0001	0.0001	0.0151	0.0158	0.0516	0.0198	0.0076	0.0083	0.0078	0.0056	0.0001	0.0419	0.0095	0.0114	0.0228	0.0235	0.0045	0.0041	0.0047	0.0523	0.0049
Cre06.g299200.v5.5:t:7373230-7373375	N3	chromosome_6:7372910-7373230	0.0741	0.0001	0.0001	0.0119	0.0001	0.0001	0.0001	0.0001	0.0254	0.0001	0.057	0.0268	0.0103	0.0145	0.0102	0.0064	0.0001	0.0456	0.0133	0.0001	0.0297	0.0381	0.006	0.0059	0.0055	0.0621	0.0074
Cre06.g299350.v5.5:t:7384847-7385105	N3	chromosome_6:7384655-7385042	0.0026	0.0379	0.0101	0.0045	0.0122	0.0062	0.0047	0.0039	0.0537	0.0032	0.0097	0.0015	0.0075	0.0037	0.004	0.0162	0.0064	0.0046	0.04	0.0241	0.0054	0.005	0.0172	0.0181	0.0116	0.002	0.0142
Cre06.g300100.v5.5:t:7459467-7459630	N3	chromosome_6:7459246-7459549	0.0108	0.0001	0.0001	0.1299	0.0001	0.0001	0.0169	0.0282	0.0797	0.0001	0.0153	0.0559	0.0001	0.0001	0.0116	0.0054	0.0138	0.008	0.0084	0.0076	0.0069	0.0094	0.0053	0.0074	0.0068	0.0189	0.0273
Cre06.g300139.v5.5:t:7461866-7461919	N3	chromosome_6:7461889-7462699	0.0001	0.0001	0.0001	0.0001	0.0001	0.0001	0.0001	0.0001	0.0001	0.0001	0.0001	0.0001	0.0001	0.0001	0.0001	0.0427	0.0095	0.0766	0.0175	0.0034	0.0029	0.0031	0.0089	0.0035	0.0169	0.0023	0.005
Cre06.g300350.v5.5:s:7492117-7492176	N3	chromosome_6:7491831-7492117	0.1194	0.0001	0.0001	0.1558	0.0001	0.0342	0.0001	0.0282	0.0262	0.0186	0.0405	0.1116	0.0737	0.0106	0.0914	0.049	0.0294	0.0429	0.046	0.0215	0.015	0.0401	0.0106	0.0171	0.0155	0.0086	0.016
Cre06.g300550.v5.5:s:7517934-7518064	N3	chromosome_6:7516833-7517934	0.0255	0.0101	0.0279	0.0055	0.0132	0.0162	0.0082	0.0137	0.0023	0.0026	0.0173	0.0089	0.0141	0.0083	0.0049	0.0239	0.0081	0.022	0.0213	0.0295	0.0237	0.0408	0.0303	0.0339	0.0232	0.0512	0.0137
Cre06.g300900.v5.5:s:7569885-7570001	N3	chromosome_6:7569154-7569885	0.0415	0.0132	0.0159	0.0077	0.0001	0.0122	0.0112	0.0636	0.024	0.0193	0.0415	0.0576	0.0154	0.0074	0.0228	0.0037	0.0145	0.0046	0.0077	0.0091	0.008	0.0088	0.0048	0.006	0.0081	0.0041	0.0082
Cre06.g300900.v5.5:t:7568981-7569154	N3	chromosome_6:7569154-7569885	0.0597	0.0265	0.0001	0.0188	0.0001	0.0209	0.0001	0.0889	0.0398	0.0424	0.0616	0.079	0.0311	0.02	0.0376	0.0084	0.0239	0.0092	0.02	0.0185	0.0165	0.0161	0.0083	0.0121	0.0168	0.0101	0.0139
Cre06.g301050.v5.5:t:7590925-7592551	N3	chromosome_6:7590692-7590925	0.0372	0.0001	0.0172	0.0334	0.0001	0.0833	0.0001	0.0501	0.0001	0.0862	0.02	0.0078	0.036	0.0956	0.0322	0.0311	0.0134	0.0085	0.0569	0.0474	0.097	0.0759	0.0402	0.0263	0.0132	0.0076	0.0386
Cre06.g301150.v5.5:s:7603345-7603449	N3	chromosome_6:7603211-7603351	0.0001	0.0001	0.0001	0.0001	0.0001	0.0001	0.0001	0.0205	0.0001	0.0001	0.0105	0.0701	0.0592	0.0085	0.0111	0.0435	0.0167	0.042	0.0101	0.0178	0.0119	0.0144	0.0104	0.0175	0.0133	0.0078	0.0154
Cre06.g301350.v5.5:s:7628850-7629511	N6	chromosome_6:7629111-7630087	0.2039	0.23	0.1306	0.264	0.2425	0.2346	0.2188	0.2664	0.1809	0.2643	0.0906	0.1112	0.097	0.21	0.3251	0.2875	0.1304	0.2808	0.161	0.2558	0.276	0.2439	0.314	0.2898	0.2901	0.3345	0.35
Cre06.g301400.v5.5:s:7637123-7637389	N3	chromosome_6:7636810-7637123	0.0001	0.0001	0.0001	0.0001	0.0001	0.0001	0.0001	0.0001	0.0001	0.0001	0.0001	0.0001	0.0001	0.0001	0.0001	0.0001	0.0001	0.0001	0.0001	0.0001	0.0001	0.0001	0.3192	0.0001	0.0001	0.0001	0.0001
Cre06.g301450.v5.5:t:7638807-7639234	N3	chromosome_6:7638610-7638866	0.0582	0.0001	0.0001	0.156	0.0001	0.0204	0.0001	0.0618	0.0001	0.0252	0.0001	0.0848	0.0001	0.0294	0.0523	0.0292	0.0192	0.0496	0.0354	0.0111	0.0249	0.0685	0.0582	0.023	0.0319	0.0278	0.0564
Cre06.g301500.v5.5:t:7649045-7649667	N3	chromosome_6:7648896-7649045	0.0001	0.0001	0.0001	0.0499	0.0296	0.0172	0.0895	0.0786	0.0135	0.0107	0.0105	0.0239	0.0358	0.0224	0.0921	0.0232	0.0836	0.0223	0.05	0.0719	0.0419	0.0116	0.0474	0.0278	0.0518	0.0836	0.0156
Cre06.g301550.v5.5:t:7654834-7654984	N3	chromosome_6:7654984-7655756	0.0001	0.0001	0.0001	0.0889	0.0001	0.0001	0.0241	0.0001	0.0689	0.0111	0.0495	0.0229	0.0101	0.004	0.0561	0.0231	0.0082	0.0029	0.0265	0.0071	0.0084	0.0371	0.0044	0.0085	0.0355	0.0248	0.0104
Cre06.g301600.v5.5:s:7661234-7661267	N3	chromosome_6:7661097-7661234	0.0527	0.1923	0.0001	0.0109	0.0001	0.0783	0.0885	0.1623	0.0001	0.0211	0.0001	0.0813	0.1389	0.0682	0.0001	0.0894	0.0417	0.0001	0.0938	0.0263	0.0471	0.1312	0.077	0.0126	0.0374	0.0559	0.0471
Cre06.g301802.v5.5:t:7688731-7688953	N3	chromosome_6:7688624-7688731	0.0001	0.0001	0.0001	0.0001	0.0001	0.0001	0.0001	0.0001	0.0001	0.0001	0.0001	0.0001	0.0001	0.0001	0.0001	0.0001	0.0001	0.0001	0.0001	0.0001	0.0001	0.0001	0.0001	0.0001	0.0001	0.3397	0.0001
Cre06.g301806.v5.5:t:7689554-7689792	N3	chromosome_6:7689440-7689554	0.0001	0.0001	0.0001	0.0001	0.0001	0.0001	0.0001	0.0001	0.0001	0.0001	0.0001	0.0001	0.0001	0.0001	0.0001	0.0001	0.0001	0.0385	0.0001	0.0001	0.1461	0.019	0.0555	0.0246	0.1595	0.0518	0.1309
Cre06.g301900.v5.5:s:7700860-7701006	N7	chromosome_6:7701006-7701371	0.0001	0.0001	0.0001	0.0415	0.0001	0.0001	0.0001	0.0001	0.0001	0.0001	0.0001	0.0001	0.0001	0.0001	0.0001	0.0001	0.0001	0.0001	0.0001	0.0001	0.0001	0.0001	0.1992	0.0001	0.0001	0.3674	0.0001
Cre06.g301900.v5.5:t:7711847-7711960	N1	chromosome_6:7711684-7711850	0.5103	0.1871	0.2889	0.3598	0.0001	0.2461	0.2636	0.2392	0.4313	0.2927	0.4532	0.2808	0.3785	0.4581	0.3201	0.4886	0.4083	0.4132	0.2572	0.3337	0.354	0.4404	0.3424	0.4203	0.3739	0.4898	0.5273
Cre06.g302000.v5.5:s:7727698-7727858	N4	chromosome_6:7727481-7727698	0.0001	0.0001	0.0001	0.1176	0.0888	0.1545	0.1651	0.1733	0.2428	0.2324	0.1273	0.194	0.128	0.2714	0.152	0.2069	0.1242	0.1673	0.2868	0.3251	0.1943	0.1608	0.2262	0.2902	0.185	0.1796	0.1342
Cre06.g302500.v5.5:s:7801801-7802176	N2	chromosome_6:7801720-7801801	0.0001	0.0001	0.0001	0.2875	0.0265	0.288	0.2043	0.3416	0.1722	0.1883	0.1715	0.1615	0.2164	0.1903	0.0001	0.0001	0.0001	0.0001	0.0001	0.0001	0.0001	0.0001	0.0001	0.0001	0.0001	0.0001	0.0001
Cre06.g303300.v5.5:t:7911902-7912280	N3	chromosome_6:7911779-7911920	0.0129	0.0001	0.0086	0.0041	0.0122	0.0051	0.0078	0.0056	0.0091	0.0122	0.0124	0.1145	0.0001	0.0001	0.0118	0.0081	0.0222	0.0088	0.0111	0.0124	0.0154	0.0103	0.0066	0.0101	0.015	0.0085	0.0188
Cre06.g304550.v5.5:s:8081766-8082077	N7	chromosome_6:8082077-8082236	0.0358	0.0001	0.0296	0.0187	0.0001	0.02	0.024	0.0716	0.0001	0.0292	0.025	0.0154	0.131	0.1016	0.0741	0.0656	0.0001	0.0163	0.0159	0.1251	0.0731	0.0503	0.0718	0.0979	0.1088	0.1026	0.239
Cre06.g304550.v5.5:t:8080977-8081275	N3	chromosome_6:8080701-8080977	0.0841	0.0001	0.0278	0.0124	0.0424	0.0265	0.1197	0.0001	0.0333	0.0001	0.0728	0.1103	0.0245	0.0598	0.018	0.0676	0.0359	0.0133	0.0162	0.024	0.0636	0.052	0.0088	0.0932	0.1385	0.0617	0.0597
Cre06.g304876.v5.5:s:8121731-8121828	N3	chromosome_6:8121828-8122313	0.0001	0.0001	0.0001	0.0001	0.0001	0.0001	0.0001	0.0001	0.0001	0.0001	0.0001	0.0806	0.0001	0.2592	0.0001	0.0001	0.0001	0.0001	0.0001	0.0001	0.0001	0.0001	0.0001	0.0001	0.0001	0.0001	0.0001
Cre06.g304876.v5.5:t:8122313-8122387	N3	chromosome_6:8121828-8122313	0.0001	0.0001	0.0001	0.0001	0.0001	0.0001	0.0001	0.0001	0.0001	0.0001	0.0001	0.1126	0.1757	0.2395	0.0001	0.0001	0.0001	0.0001	0.0001	0.0001	0.0001	0.0001	0.0001	0.0001	0.0001	0.0001	0.0001
Cre06.g305050.v5.5:s:8143064-8143157	N3	chromosome_6:8142979-8143064	0.0107	0.0001	0.0001	0.0259	0.0001	0.0001	0.0001	0.0001	0.0001	0.0123	0.0069	0.0039	0.0072	0.007	0.0069	0.0049	0.015	0.006	0.0352	0.0115	0.0101	0.0509	0.1081	0.0145	0.0001	0.0159	0.0001
Cre06.g306035.v5.5:t:8290663-8290856	N2	chromosome_6:8290301-8290663	0.0001	0.0001	0.0001	0.4617	0.0001	0.4696	0.0001	0.5518	0.4291	0.0001	0.0001	0.3364	0.0001	0.0001	0.0001	0.0001	0.0001	0.0001	0.0001	0.0001	0.0001	0.0001	0.0001	0.0001	0.0001	0.0001	0.0001
Cre06.g306150.v5.5:s:8322134-8322235	N2	chromosome_6:8321849-8322134	0.0001	0.0001	0.0001	0.0001	0.0001	0.0001	0.0001	0.0001	0.0001	0.2977	0.3689	0.1954	0.1797	0.1022	0.0147	0.0835	0.0001	0.0129	0.0001	0.0001	0.0001	0.0001	0.0001	0.0001	0.0001	0.0001	0.0001
Cre06.g306250.v5.5:s:8331816-8331906	N3	chromosome_6:8331701-8331816	0.1258	0.0001	0.0001	0.0313	0.0001	0.0001	0.0265	0.0001	0.0597	0.0355	0.0461	0.0523	0.0962	0.0094	0.0504	0.0297	0.0064	0.0223	0.0382	0.0305	0.0189	0.0141	0.0558	0.0315	0.0289	0.0339	0.056
Cre06.g306250.v5.5:s:8333104-8333497	N4	chromosome_6:8332877-8333104	0.0001	0.0001	0.0001	0.0001	0.0001	0.0001	0.0001	0.0001	0.0001	0.0001	0.0001	0.253	0.0001	0.3021	0.0001	0.4099	0.0001	0.3401	0.3565	0.2677	0.4562	0.3069	0.343	0.2805	0.3537	0.4574	0.0001
Cre06.g306400.v5.5:t:8342083-8342138	N3	chromosome_6:8341812-8342083	0.0024	0.0076	0.019	0.0057	0.0001	0.0253	0.0434	0.0058	0.0344	0.0091	0.0057	0.0126	0.0045	0.0103	0.0123	0.0713	0.0159	0.0071	0.0087	0.0152	0.0083	0.0069	0.0188	0.0496	0.0068	0.0064	0.0106
Cre06.g306400.v5.5:t:8343796-8343960	N3	chromosome_6:8343430-8343844	0.0471	0.0488	0.0556	0.0683	0.1471	0.0142	0.0136	0.063	0.0115	0.0447	0.0988	0.0293	0.0356	0.1316	0.0137	0.0863	0.0208	0.0185	0.035	0.019	0.0118	0.0136	0.0106	0.0086	0.0505	0.0254	0.0238
Cre06.g307012.v5.5:t:8413751-8413834	N3	chromosome_6:8413620-8413755	0.1058	0.0001	0.0001	0.0956	0.0001	0.0001	0.0001	0.0513	0.0001	0.0001	0.0001	0.0428	0.0001	0.0001	0.0628	0.1024	0.0001	0.1579	0.0067	0.0001	0.0708	0.0355	0.0362	0.0513	0.0545	0.046	0.0581
Cre06.g307075.v5.5:s:8415183-8415375	N3	chromosome_6:8415375-8415569	0.1042	0.1175	0.088	0.1128	0.1241	0.1196	0.0475	0.0312	0.016	0.1223	0.0689	0.0524	0.0831	0.0416	0.0253	0.0132	0.0112	0.0251	0.0205	0.0243	0.005	0.0043	0.0277	0.0399	0.0377	0.0239	0.0305
Cre06.g307350.v5.5:s:8453299-8453358	N3	chromosome_6:8452784-8453299	0.0001	0.0001	0.0001	0.0656	0.0001	0.0001	0.0001	0.0152	0.0208	0.0207	0.1411	0.0497	0.0972	0.0176	0.0001	0.0492	0.0001	0.0001	0.0303	0.0238	0.0282	0.0001	0.0164	0.0001	0.0901	0.0341	0.0001
Cre06.g307350.v5.5:t:8452579-8452784	N3	chromosome_6:8452784-8453299	0.0001	0.0001	0.0001	0.1048	0.0001	0.0001	0.0142	0.0107	0.0001	0.0519	0.0968	0.0344	0.0701	0.0098	0.0102	0.039	0.0001	0.0117	0.0145	0.0225	0.0242	0.0001	0.0071	0.0001	0.0556	0.0237	0.0099
Cre06.g307400.v5.5:t:8455490-8455627	N4	chromosome_6:8455627-8455983	0.2335	0.119	0.2369	0.1442	0.0001	0.1751	0.0001	0.2153	0.0001	0.1008	0.2295	0.2279	0.1996	0.2423	0.323	0.2205	0.1674	0.2787	0.2436	0.3204	0.1908	0.3088	0.1848	0.2792	0.2378	0.2291	0.0001
Cre06.g307650.v5.5:s:8478967-8479135	N3	chromosome_6:8478816-8478967	0.0001	0.0001	0.0001	0.0001	0.0001	0.0001	0.0001	0.0001	0.0141	0.042	0.0111	0.0063	0.0325	0.04	0.0119	0.0616	0.0001	0.0145	0.1167	0.0001	0.1328	0.0606	0.0123	0.0001	0.0187	0.1059	0.0001
Cre06.g307900.v5.5:t:8510232-8510320	N3	chromosome_6:8509967-8510232	0.0001	0.0001	0.0001	0.0076	0.0001	0.0001	0.0001	0.0076	0.0104	0.0001	0.0104	0.0286	0.0531	0.0512	0.0373	0.0407	0.0304	0.0364	0.0602	0.0128	0.0309	0.0284	0.0512	0.0973	0.1011	0.0496	0.0711
Cre06.g307900.v5.5:t:8510610-8510702	N3	chromosome_6:8509116-8510610	0.0278	0.0001	0.0118	0.0119	0.0001	0.0001	0.0673	0.0496	0.0902	0.015	0.0001	0.0734	0.0844	0.0409	0.0276	0.038	0.0391	0.0515	0.0318	0.0102	0.0447	0.0442	0.0322	0.0176	0.0261	0.0324	0.0337
Cre06.g308400.v5.5:s:8560714-8560814	N3	chromosome_6:8560814-8560900	0.0001	0.0001	0.0001	0.3002	0.0001	0.0001	0.0001	0.0001	0.0001	0.0001	0.0001	0.3571	0.0001	0.0001	0.0001	0.0001	0.0001	0.0353	0.0001	0.0001	0.0001	0.0001	0.1668	0.0001	0.0001	0.0001	0.0001
Cre06.g308400.v5.5:t:8559999-8560156	N3	chromosome_6:8559882-8560025	0.1471	0.0001	0.0001	0.1366	0.0001	0.2419	0.0001	0.2794	0.0332	0.0001	0.1054	0.2079	0.0001	0.0001	0.0001	0.0001	0.0001	0.0001	0.0001	0.0001	0.0001	0.0001	0.0001	0.0001	0.0001	0.0001	0.0001
Cre06.g308600.v5.5:s:8575661-8575771	N3	chromosome_6:8575374-8575661	0.0001	0.0001	0.0001	0.0001	0.0001	0.0001	0.0001	0.0001	0.0001	0.013	0.0325	0.0996	0.0294	0.0406	0.02	0.0223	0.0152	0.0438	0.0075	0.0054	0.0078	0.0259	0.0195	0.0217	0.0363	0.0306	0.029
Cre06.g311200.v5.5:s:8906417-8906533	N3	chromosome_6:8906533-8907215	0.0001	0.0001	0.0001	0.0001	0.0001	0.0001	0.0001	0.2238	0.0278	0.0001	0.1147	0.0001	0.0001	0.0332	0.0001	0.0294	0.0001	0.0001	0.0001	0.0001	0.0001	0.0001	0.0001	0.0001	0.0001	0.0001	0.0001
Cre06.g311450.v5.5:t:8940399-8940649	N2	chromosome_6:8940339-8940399	0.0001	0.0001	0.0001	0.1183	0.1109	0.0854	0.0963	0.0041	0.1109	0.0556	0.0797	0.0927	0.0992	0.0919	0.1041	0.1212	0.0001	0.0074	0.1936	0.0001	0.0503	0.1046	0.1075	0.1741	0.0876	0.042	0.0001
Cre06.g311500.v5.5:t:8964354-8964744	N3	chromosome_6:8964215-8964354	0.0677	0.0001	0.0001	0.1435	0.0001	0.0205	0.123	0.0111	0.0316	0.0001	0.0001	0.0193	0.1031	0.0001	0.0001	0.0203	0.0001	0.0554	0.0202	0.0278	0.0131	0.0125	0.0442	0.0207	0.0084	0.0274	0.0119
Cre06.g311950.v5.5:t:9007944-9008171	N3	chromosome_6:9007733-9007944	0.0001	0.0001	0.042	0.0439	0.0132	0.0608	0.0079	0.0389	0.0604	0.0318	0.0041	0.0483	0.0043	0.0717	0.0848	0.0342	0.0074	0.0599	0.1736	0.0752	0.022	0.04	0.0364	0.0677	0.1124	0.0287	0.1019
Cre06.g311950.v5.5:t:9008260-9008506	N3	chromosome_6:9008055-9008302	0.0001	0.0001	0.0001	0.0377	0.0001	0.0001	0.0104	0.0378	0.0088	0.01	0.05	0.0134	0.0078	0.0242	0.0428	0.0702	0.01	0.057	0.0084	0.088	0.0055	0.0716	0.0322	0.0357	0.1778	0.0174	0.0064
Cre07.g312050.v5.5:s:20884-21043	N3	chromosome_7:20760-20884	0.0171	0.0001	0.0236	0.0139	0.0001	0.015	0.0238	0.0216	0.016	0.0355	0.0109	0.007	0.0101	0.0126	0.0115	0.0064	0.0209	0.0778	0.0108	0.0109	0.0148	0.0101	0.0084	0.0103	0.0132	0.0058	0.0082
Cre07.g312800.v5.5:t:93206-93661	N4	chromosome_7:92922-93206	0.186	0.0001	0.0001	0.3094	0.0001	0.0001	0.3422	0.3792	0.0001	0.1457	0.4824	0.2589	0.0001	0.2148	0.2788	0.2709	0.0001	0.4456	0.3922	0.2119	0.2841	0.28	0.3784	0.3087	0.2705	0.2673	0.3461
Cre07.g313400.v5.5:s:180988-182319	N3	chromosome_7:180286-181432	0.0001	0.0001	0.0001	0.0001	0.0001	0.0001	0.0001	0.0001	0.0001	0.0001	0.0001	0.0001	0.0001	0.1362	0.0001	0.0095	0.0001	0.0001	0.0131	0.0001	0.0001	0.0001	0.0112	0.0001	0.1654	0.2237	0.0001
Cre07.g313400.v5.5:t:177793-179832	N7	chromosome_7:179832-180287	0.0001	0.0001	0.0001	0.0001	0.0001	0.0001	0.0001	0.0001	0.0001	0.0001	0.0001	0.0001	0.0001	0.1044	0.0001	0.0762	0.0001	0.0001	0.0946	0.0001	0.0001	0.0001	0.0818	0.0001	0.354	0.2642	0.0001
Cre07.g313450.v5.5:s:186445-186514	N3	chromosome_7:186241-186445	0.0001	0.0001	0.0001	0.0001	0.0001	0.0001	0.0001	0.0001	0.0001	0.0001	0.0001	0.0001	0.0001	0.0001	0.0001	0.1392	0.0001	0.2556	0.0001	0.0001	0.0208	0.0001	0.0303	0.0001	0.0001	0.0001	0.0001
Cre07.g313450.v5.5:s:187515-188297	N3	chromosome_7:187182-187515	0.0094	0.0451	0.0229	0.01	0.0266	0.023	0.018	0.0153	0.0182	0.0147	0.0107	0.0431	0.018	0.0127	0.035	0.0237	0.05	0.0059	0.0156	0.0347	0.0381	0.086	0.0406	0.0099	0.0253	0.0057	0.0126
Cre07.g314250.v5.5:t:301229-302409	N3	chromosome_7:301008-301229	0.0001	0.0001	0.0001	0.0001	0.0001	0.0887	0.0001	0.0001	0.0417	0.0001	0.0001	0.0743	0.0417	0.0645	0.0779	0.0386	0.0673	0.032	0.0484	0.0219	0.0138	0.0675	0.0143	0.0144	0.0757	0.1063	0.0001
Cre07.g314300.v5.5:s:306014-306204	N3	chromosome_7:305328-306109	0.0001	0.0001	0.0001	0.017	0.0001	0.0118	0.0187	0.0067	0.0064	0.0078	0.0304	0.1468	0.0096	0.0069	0.0055	0.0052	0.0096	0.0385	0.0067	0.0075	0.0508	0.0081	0.0078	0.0132	0.0063	0.0077	0.0001
Cre07.g314600.v5.5:t:346053-346142	N3	chromosome_7:345895-346053	0.0672	0.0268	0.0492	0.0261	0.0441	0.0298	0.0522	0.0327	0.0183	0.0227	0.0158	0.1358	0.0074	0.0782	0.116	0.0043	0.0548	0.0038	0.0135	0.0151	0.0064	0.0066	0.0275	0.0043	0.006	0.0217	0.0057
Cre07.g314866.v5.5:s:393777-394035	N3	chromosome_7:393588-393777	0.4964	0.0001	0.0001	0.0001	0.0001	0.0001	0.0001	0.0001	0.0001	0.0001	0.0001	0.0001	0.0001	0.0001	0.0001	0.0001	0.0001	0.0001	0.0001	0.0001	0.0001	0.0001	0.0001	0.0001	0.0001	0.0001	0.0001
Cre07.g315200.v5.5:s:422616-422682	N3	chromosome_7:422682-423307	0.0156	0.0543	0.0121	0.0732	0.02	0.0092	0.012	0.0147	0.0173	0.0138	0.0076	0.0166	0.011	0.0124	0.0083	0.0059	0.0119	0.0074	0.0081	0.0084	0.0074	0.006	0.0037	0.0051	0.0055	0.0035	0.0051
Cre07.g315200.v5.5:t:423307-423757	N3	chromosome_7:422682-423307	0.0109	0.0458	0.008	0.0512	0.02	0.0088	0.0091	0.0116	0.013	0.0101	0.0079	0.0114	0.0068	0.0089	0.0073	0.0049	0.0113	0.0042	0.0061	0.0078	0.0049	0.005	0.0035	0.004	0.0045	0.0028	0.0046
Cre07.g316200.v5.5:s:533631-533957	N3	chromosome_7:533919-534978	0.0001	0.0001	0.0001	0.111	0.0001	0.0175	0.0186	0.0365	0.0187	0.0001	0.0001	0.0107	0.0451	0.0075	0.0662	0.0258	0.0837	0.0057	0.0067	0.007	0.0063	0.0508	0.0602	0.0195	0.0589	0.0561	0.0295
Cre07.g316200.v5.5:t:534978-535019	N2	chromosome_7:534167-534978	0.0001	0.0001	0.0001	0.2102	0.0001	0.0001	0.0001	0.358	0.0001	0.0001	0.0001	0.6442	0.4715	0.3596	0.1278	0.1916	0.1405	0.1014	0.0677	0.0757	0.1327	0.0699	0.0902	0.0395	0.0735	0.1093	0.0675
Cre07.g316200.v5.5:t:540787-541001	N2	chromosome_7:540666-540944	0.2028	0.1063	0.1237	0.1318	0.0147	0.1125	0.0882	0.127	0.128	0.097	0.1156	0.114	0.1818	0.1147	0.1151	0.0946	0.1813	0.0989	0.0273	0.1005	0.0558	0.0337	0.1092	0.0303	0.0677	0.1408	0.0083
Cre07.g316200.v5.5:t:541389-541642	N3	chromosome_7:541238-541447	0.0151	0.0343	0.0175	0.019	0.0056	0.0593	0.035	0.0127	0.018	0.0048	0.0329	0.0262	0.024	0.0325	0.0132	0.0259	0.0209	0.0273	0.0027	0.027	0.0224	0.0411	0.0255	0.0196	0.022	0.027	0.0267
Cre07.g316400.v5.5:s:549397-549687	N2	chromosome_7:549648-549831	0.0001	0.0001	0.0001	0.021	0.0001	0.0001	0.0001	0.0001	0.0001	0.0001	0.1651	0.2466	0.1142	0.0001	0.1357	0.2443	0.0001	0.1815	0.0631	0.0001	0.0001	0.0001	0.1645	0.0001	0.0001	0.0001	0.0001
Cre07.g316400.v5.5:t:547184-547388	N3	chromosome_7:547059-547184	0.0001	0.0001	0.0001	0.0807	0.0001	0.0001	0.0001	0.0001	0.0363	0.1138	0.0884	0.0117	0.0214	0.0303	0.0124	0.006	0.0199	0.0174	0.0127	0.0144	0.0001	0.0001	0.0144	0.0001	0.0001	0.0217	0.0263
Cre07.g316725.v5.5:s:591591-592135	N3	chromosome_7:592135-592659	0.2434	0.0001	0.0187	0.0127	0.0001	0.0001	0.0001	0.1305	0.0001	0.0833	0.0001	0.1145	0.1058	0.0001	0.0001	0.0112	0.0001	0.0154	0.0001	0.0001	0.0001	0.0001	0.0198	0.0001	0.0001	0.0735	0.0178
Cre07.g316725.v5.5:t:592659-592737	N3	chromosome_7:592135-592659	0.302	0.1064	0.0252	0.0611	0.0001	0.0247	0.0248	0.0001	0.0294	0.0889	0.0001	0.1211	0.1025	0.0001	0.0001	0.0176	0.0001	0.017	0.0266	0.0001	0.0313	0.0001	0.0202	0.0001	0.0001	0.0784	0.0255
Cre07.g316900.v5.5:s:617368-617684	N3	chromosome_7:617105-617368	0.0001	0.0001	0.0001	0.0001	0.0001	0.0001	0.0001	0.0001	0.0001	0.0001	0.0001	0.0001	0.0001	0.0001	0.0001	0.0001	0.0001	0.1128	0.0001	0.0001	0.0001	0.0001	0.0679	0.0001	0.0001	0.1601	0.0001
Cre07.g317000.v5.5:t:640786-641386	N2	chromosome_7:640373-640786	0.0001	0.0001	0.0001	0.3371	0.0001	0.0001	0.1786	0.2451	0.1034	0.1648	0.0001	0.313	0.1739	0.0139	0.0047	0.0036	0.0112	0.0044	0.0049	0.0076	0.0071	0.0083	0.0039	0.0064	0.012	0.0054	0.012
Cre07.g317100.v5.5:t:648061-648129	N3	chromosome_7:647897-648061	0.0001	0.0001	0.0001	0.0355	0.0001	0.0382	0.0001	0.0001	0.0001	0.0001	0.0001	0.0001	0.0001	0.0001	0.006	0.0047	0.0094	0.0041	0.0069	0.0108	0.0115	0.0152	0.0069	0.118	0.0221	0.0075	0.0195
Cre07.g317800.v5.5:t:743586-743689	N2	chromosome_7:743686-744563	0.0001	0.0001	0.0001	0.1339	0.0001	0.0001	0.0001	0.0848	0.1091	0.1212	0.2103	0.1416	0.1313	0.1464	0.1903	0.1419	0.0146	0.2417	0.1726	0.0975	0.3303	0.1424	0.1608	0.1812	0.0767	0.2194	0.13
Cre07.g317908.v5.5:t:761064-761237	N3	chromosome_7:760711-761140	0.0001	0.0001	0.0001	0.0001	0.0001	0.0001	0.0001	0.0084	0.0074	0.0112	0.0097	0.0228	0.0374	0.0333	0.0535	0.0988	0.0001	0.0001	0.0784	0.0001	0.0001	0.0001	0.0001	0.012	0.0521	0.0001	0.0001
Cre07.g317950.v5.5:s:776109-776490	N7	chromosome_7:775991-776109	0.074	0.0001	0.0001	0.0001	0.0001	0.0001	0.0001	0.0001	0.0001	0.0001	0.0001	0.0001	0.0001	0.0001	0.0001	0.3479	0.0001	0.0001	0.2284	0.0001	0.1233	0.4851	0.2939	0.1355	0.31	0.2924	0.3212
Cre07.g318250.v5.5:s:801709-802447	N3	chromosome_7:801427-801709	0.0001	0.0001	0.0001	0.0001	0.0001	0.0001	0.0001	0.0001	0.0001	0.0001	0.0001	0.5672	0.0001	0.3423	0.0001	0.0001	0.0001	0.0001	0.0001	0.0001	0.0001	0.0001	0.0001	0.0001	0.0001	0.0001	0.0001
Cre07.g318551.v5.5:s:855182-855265	N3	chromosome_7:854598-855182	0.0096	0.0001	0.1111	0.0098	0.0001	0.0115	0.0147	0.0144	0.0197	0.0166	0.0001	0.0077	0.0448	0.0001	0.0145	0.0392	0.0001	0.0225	0.0222	0.0001	0.0409	0.0091	0.0343	0.0312	0.0918	0.0159	0.0297
Cre07.g318551.v5.5:t:854236-854598	N3	chromosome_7:854598-855182	0.0096	0.0001	0.1106	0.0099	0.0001	0.0115	0.0146	0.0143	0.019	0.0173	0.0001	0.0077	0.0444	0.0001	0.0145	0.0395	0.0001	0.0211	0.0222	0.0001	0.0409	0.0087	0.0328	0.0308	0.0927	0.0158	0.0305
Cre07.g319350.v5.5:s:1007481-1007519	N3	chromosome_7:1006340-1007481	0.0443	0.0001	0.0001	0.1272	0.0001	0.0001	0.1394	0.0601	0.0001	0.0152	0.0166	0.0178	0.0184	0.0169	0.0152	0.0496	0.0001	0.1156	0.0187	0.1174	0.0532	0.1228	0.0096	0.0252	0.0106	0.0907	0.035
Cre07.g319350.v5.5:s:1009097-1009110	N7	chromosome_7:1007519-1009097	0.1593	0.0001	0.0001	0.205	0.0001	0.0333	0.0001	0.0605	0.0875	0.0001	0.0185	0.0605	0.0001	0.0891	0.0659	0.1146	0.0001	0.1027	0.0191	0.1003	0.0536	0.1401	0.0742	0.163	0.0547	0.1321	0.1036
Cre07.g319350.v5.5:s:1009358-1009433	N7	chromosome_7:1007771-1009358	0.1516	0.0001	0.0001	0.0228	0.0001	0.0743	0.0001	0.0179	0.0793	0.0001	0.0883	0.0551	0.0001	0.1142	0.103	0.1037	0.0001	0.1676	0.058	0.1	0.1411	0.1209	0.111	0.0436	0.03	0.0685	0.0839
Cre07.g319350.v5.5:t:1007481-1007519	N7	chromosome_7:1007519-1009097	0.2363	0.0001	0.0001	0.0001	0.0001	0.0001	0.0001	0.0001	0.0001	0.0001	0.0001	0.0001	0.0001	0.0001	0.0001	0.0001	0.0001	0.0889	0.0001	0.0001	0.0945	0.0001	0.1226	0.2402	0.1324	0.2625	0.1741
Cre07.g319400.v5.5:t:1021341-1021597	N3	chromosome_7:1020930-1021341	0.0001	0.0001	0.0001	0.0105	0.0277	0.0149	0.011	0.0089	0.0101	0.0089	0.0109	0.0627	0.0076	0.0097	0.013	0.0151	0.021	0.0074	0.0128	0.0141	0.0136	0.0132	0.0084	0.0105	0.0159	0.0096	0.0216
Cre07.g319800.v5.5:t:1082505-1082729	N3	chromosome_7:1082729-1083005	0.0001	0.0001	0.0001	0.0179	0.0001	0.0001	0.0001	0.0001	0.0001	0.0001	0.0001	0.0001	0.0001	0.0001	0.0001	0.1498	0.0001	0.1729	0.1341	0.0001	0.0001	0.0001	0.0105	0.2717	0.0114	0.0631	0.0907
Cre07.g319950.v5.5:t:1094872-1095141	N3	chromosome_7:1094700-1094965	0.0182	0.0118	0.0115	0.0055	0.0001	0.0133	0.0001	0.0108	0.0087	0.006	0.0059	0.0024	0.0038	0.0139	0.0212	0.0021	0.0244	0.0211	0.0587	0.0048	0.0053	0.005	0.0232	0.0041	0.0056	0.003	0.0076
Cre07.g320800.v5.5:s:1175327-1175540	N3	chromosome_7:1175184-1175351	0.0001	0.0001	0.0001	0.0001	0.0001	0.0001	0.0001	0.077	0.0463	0.0533	0.0334	0.0458	0.0322	0.051	0.0396	0.081	0.0552	0.0754	0.078	0.0556	0.0001	0.0108	0.0783	0.067	0.0154	0.0111	0.0001
Cre07.g320800.v5.5:s:1176776-1176841	N3	chromosome_7:1176481-1176776	0.0001	0.0001	0.0001	0.0001	0.0001	0.0001	0.0001	0.0443	0.0128	0.0243	0.0014	0.0223	0.0136	0.0066	0.0244	0.0611	0.0324	0.0135	0.0138	0.0039	0.0346	0.0071	0.0267	0.0082	0.0001	0.0071	0.0001
Cre07.g320800.v5.5:t:1176350-1176488	N3	chromosome_7:1176481-1176776	0.0001	0.0001	0.0001	0.0001	0.0001	0.0001	0.0001	0.0384	0.0093	0.0271	0.0016	0.0198	0.014	0.0074	0.0243	0.0626	0.0328	0.0124	0.0147	0.0048	0.0405	0.0168	0.0318	0.0114	0.0001	0.0159	0.0001
Cre07.g321200.v5.5:s:1216239-1216368	N2	chromosome_7:1216014-1216239	0.3125	0.0001	0.2602	0.3613	0.0001	0.1981	0.1576	0.1651	0.1662	0.0001	0.0001	0.3473	0.3444	0.3176	0.0001	0.0001	0.0001	0.2757	0.0001	0.0001	0.0001	0.0001	0.2552	0.0001	0.145	0.2277	0.2572
Cre07.g321650.v5.5:t:1263796-1264186	N7	chromosome_7:1263517-1263796	0.1009	0.118	0.114	0.0971	0.0713	0.0885	0.0425	0.1155	0.0666	0.0429	0.0688	0.0454	0.0635	0.0207	0.0518	0.045	0.1238	0.0567	0.0633	0.0532	0.0599	0.0634	0.0947	0.0557	0.1181	0.069	0.1165
Cre07.g321951.v5.5:s:1294242-1294390	N7	chromosome_7:1292649-1294242	0.1967	0.0001	0.0001	0.1825	0.0001	0.0001	0.0001	0.0001	0.0001	0.0001	0.0001	0.25	0.0001	0.0001	0.0001	0.0001	0.0001	0.1827	0.0001	0.0001	0.1	0.0001	0.3139	0.3883	0.2993	0.3423	0.0001
Cre07.g322600.v5.5:s:1384255-1384367	N3	chromosome_7:1384367-1384775	0.0001	0.0001	0.0001	0.1265	0.0001	0.0611	0.0001	0.0195	0.1111	0.0001	0.0001	0.0326	0.0001	0.0144	0.0119	0.0089	0.0187	0.1148	0.0702	0.0742	0.0075	0.0929	0.0117	0.0129	0.0133	0.0115	0.0129
Cre07.g322900.v5.5:s:1415654-1415852	N3	chromosome_7:1415414-1415654	0.0001	0.0001	0.0001	0.0001	0.0001	0.0001	0.0001	0.0636	0.0001	0.0001	0.0001	0.0493	0.0001	0.0157	0.068	0.0096	0.0001	0.0719	0.0145	0.0143	0.0134	0.0159	0.0236	0.0129	0.0731	0.102	0.0383
Cre07.g322900.v5.5:s:1418033-1418321	N7	chromosome_7:1417831-1418033	0.0001	0.0001	0.0001	0.0001	0.0001	0.0001	0.0001	0.0162	0.0001	0.0789	0.0238	0.0614	0.0001	0.1066	0.1554	0.0946	0.0001	0.0359	0.0687	0.1681	0.1119	0.102	0.0563	0.2399	0.161	0.1424	0.0001
Cre07.g324000.v5.5:s:1510076-1510172	N3	chromosome_7:1509757-1510076	0.0901	0.0262	0.0433	0.0489	0.0001	0.0087	0.0087	0.0063	0.0047	0.0194	0.0247	0.0099	0.0225	0.0072	0.0074	0.0069	0.0124	0.0223	0.014	0.0116	0.0077	0.0132	0.0407	0.0146	0.0114	0.0133	0.0001
Cre07.g325716.v5.5:s:1738365-1738535	N3	chromosome_7:1738535-1738910	0.0001	0.0001	0.0001	0.0001	0.0001	0.0001	0.0001	0.0001	0.0195	0.0505	0.0575	0.0275	0.0516	0.0103	0.0393	0.0086	0.0179	0.0084	0.0227	0.0386	0.0001	0.0001	0.0001	0.0001	0.0001	0.0001	0.0001
Cre07.g325718.v5.5:s:1752298-1752486	N2	chromosome_7:1752486-1755065	0.1603	0.0939	0.2202	0.1924	0.0001	0.1111	0.1569	0.1031	0.1604	0.168	0.0995	0.138	0.0001	0.0001	0.0001	0.0001	0.0001	0.0001	0.0001	0.0001	0.0001	0.0001	0.1063	0.1014	0.0895	0.13	0.1925
Cre07.g325718.v5.5:t:1753073-1753132	N3	chromosome_7:1752896-1753073	0.023	0.0388	0.0217	0.0276	0.0001	0.1157	0.0616	0.0603	0.0179	0.0655	0.1056	0.0109	0.0001	0.0001	0.0001	0.0001	0.0001	0.0001	0.0001	0.0001	0.0001	0.0001	0.0251	0.0682	0.021	0.0067	0.0186
Cre07.g325724.v5.5:t:1798965-1799183	N4	chromosome_7:1798541-1798965	0.0741	0.0001	0.2332	0.333	0.0001	0.1975	0.0001	0.1361	0.0303	0.1778	0.322	0.2043	0.1362	0.3496	0.3	0.2421	0.2548	0.2742	0.1969	0.239	0.2418	0.1802	0.2123	0.1601	0.2508	0.1676	0.2547
Cre07.g325733.v5.5:s:1848632-1848949	N3	chromosome_7:1848420-1848703	0.0001	0.0001	0.0001	0.0622	0.0001	0.0251	0.0314	0.0001	0.0254	0.0603	0.0001	0.0899	0.0001	0.0253	0.0519	0.0435	0.0001	0.0001	0.0001	0.0001	0.0153	0.0245	0.1191	0.0571	0.0677	0.0162	0.0001
Cre07.g325736.v5.5:t:1860821-1860924	N3	chromosome_7:1860355-1860893	0.015	0.0248	0.0316	0.0458	0.0143	0.0305	0.028	0.0411	0.0459	0.0459	0.0258	0.0245	0.0017	0.0247	0.0093	0.0039	0.0087	0.0241	0.0264	0.0616	0.0269	0.0051	0.0028	0.0171	0.0974	0.0045	0.0226
Cre07.g325737.v5.5:t:1864625-1865137	N2	chromosome_7:1865137-1865732	0.0001	0.0001	0.0001	0.2773	0.0001	0.0001	0.0001	0.0001	0.3772	0.2698	0.0001	0.2135	0.1316	0.0001	0.0001	0.0001	0.0001	0.3018	0.0001	0.0001	0.0001	0.0001	0.0001	0.0001	0.0001	0.0001	0.0001
Cre07.g325755.v5.5:s:1978199-1978323	N2	chromosome_7:1978015-1978199	0.1035	0.0882	0.104	0.0757	0.116	0.1387	0.1188	0.1134	0.0587	0.0988	0.0908	0.084	0.0971	0.0621	0.0824	0.0319	0.1082	0.0659	0.1142	0.102	0.12	0.0717	0.0954	0.081	0.1309	0.1451	0.1122
Cre07.g325760.v5.5:s:2017410-2018615	N3	chromosome_7:2016543-2017410	0.2429	0.0001	0.0001	0.0001	0.0001	0.0001	0.0001	0.0001	0.0001	0.0001	0.0001	0.0001	0.0001	0.0001	0.0001	0.0001	0.0001	0.0001	0.0001	0.0001	0.0001	0.0001	0.0001	0.0001	0.0001	0.0001	0.0001
Cre07.g325950.v5.5:s:2070883-2070994	N3	chromosome_7:2070755-2070883	0.0478	0.0238	0.0104	0.0059	0.0001	0.011	0.0137	0.0154	0.0273	0.0183	0.0199	0.0136	0.0185	0.0108	0.1069	0.0229	0.0159	0.0147	0.0126	0.0148	0.0132	0.0133	0.0731	0.0418	0.0098	0.0307	0.0691
Cre07.g326010.v5.5:s:2075386-2076428	N2	chromosome_7:2075175-2075386	0.1371	0.0001	0.1974	0.2196	0.0001	0.1528	0.2177	0.2498	0.0239	0.1389	0.0557	0.1568	0.1355	0.1418	0.0135	0.0449	0.1205	0.1472	0.1712	0.0967	0.0947	0.1341	0.0484	0.1298	0.0858	0.1457	0.22
Cre07.g326100.v5.5:s:2098744-2099056	N6	chromosome_7:2098511-2098744	0.0001	0.0001	0.0001	0.4332	0.0001	0.0001	0.0001	0.4398	0.384	0.3664	0.4259	0.3382	0.4408	0.3038	0.3311	0.2232	0.0001	0.5539	0.2609	0.0001	0.0001	0.1676	0.1501	0.0001	0.0001	0.2914	0.0001
Cre07.g326500.v5.5:s:2132942-2133123	N3	chromosome_7:2132766-2132951	0.038	0.0001	0.0001	0.0313	0.0001	0.0493	0.0665	0.0427	0.0634	0.0518	0.1247	0.0773	0.1077	0.0001	0.0001	0.0001	0.0001	0.0001	0.0001	0.0001	0.0001	0.0001	0.0001	0.0001	0.0001	0.0001	0.0001
Cre07.g326500.v5.5:t:2135133-2135298	N3	chromosome_7:2135298-2135480	0.064	0.0001	0.0001	0.1055	0.0001	0.1385	0.0556	0.0421	0.0374	0.0263	0.0629	0.0172	0.0165	0.0001	0.0001	0.0001	0.0001	0.0001	0.0001	0.0001	0.0001	0.0001	0.0001	0.0001	0.0001	0.0001	0.0001
Cre07.g327100.v5.5:s:2203511-2203751	N3	chromosome_7:2203326-2203511	0.0706	0.0001	0.0001	0.1835	0.0001	0.0715	0.0001	0.0219	0.1087	0.0455	0.0532	0.0126	0.0537	0.0719	0.0001	0.0179	0.0001	0.0556	0.1488	0.0264	0.0001	0.0249	0.0155	0.0001	0.0432	0.0578	0.0001
Cre07.g328050.v5.5:s:2337788-2337834	N3	chromosome_7:2337026-2337788	0.0414	0.109	0.0689	0.047	0.0598	0.0545	0.1108	0.0529	0.0873	0.0289	0.0654	0.0609	0.0381	0.0804	0.0676	0.0315	0.0395	0.0394	0.0051	0.0084	0.0056	0.0061	0.0101	0.0131	0.0048	0.014	0.0063
Cre07.g328050.v5.5:t:2336884-2337026	N3	chromosome_7:2337026-2337788	0.047	0.0993	0.0769	0.0699	0.0429	0.067	0.1359	0.0762	0.0642	0.0239	0.0701	0.0731	0.0443	0.0823	0.0948	0.0426	0.0447	0.0448	0.004	0.0068	0.0043	0.0041	0.0141	0.0172	0.0048	0.02	0.0086
Cre07.g328075.v5.5:t:2340627-2341103	N6	chromosome_7:2340444-2340627	0.2748	0.3666	0.3238	0.3672	0.3841	0.3819	0.4086	0.3564	0.3197	0.0993	0.0001	0.3615	0.0001	0.0001	0.2497	0.2943	0.4295	0.5077	0.3287	0.3063	0.2638	0.3402	0.411	0.3887	0.2499	0.359	0.3405
Cre07.g328400.v5.5:s:2373227-2373355	N3	chromosome_7:2373104-2373227	0.0845	0.0604	0.0919	0.0562	0.0506	0.0296	0.032	0.0642	0.0253	0.0227	0.0361	0.0446	0.0554	0.0179	0.0208	0.0186	0.0108	0.0194	0.034	0.0105	0.0173	0.0385	0.0104	0.0025	0.0033	0.0037	0.0065
Cre07.g328500.v5.5:s:2379706-2379788	N3	chromosome_7:2379530-2379706	0.0001	0.0001	0.0001	0.0001	0.0001	0.0001	0.0001	0.0001	0.0001	0.0001	0.0504	0.1471	0.0152	0.0139	0.0144	0.087	0.0262	0.0217	0.0644	0.0001	0.0001	0.0001	0.0001	0.0001	0.0001	0.0001	0.0001
Cre07.g329100.v5.5:s:2452810-2454143	N2	chromosome_7:2452682-2452810	0.1179	0.1931	0.174	0.1443	0.1912	0.1685	0.2034	0.172	0.1497	0.1238	0.2019	0.1865	0.1417	0.1253	0.1169	0.1437	0.1548	0.1445	0.1124	0.0833	0.1823	0.0946	0.1529	0.1054	0.1337	0.1449	0.1241
Cre07.g329150.v5.5:s:2461932-2461992	N3	chromosome_7:2461992-2464316	0.0532	0.0125	0.0805	0.0075	0.0001	0.0001	0.012	0.0001	0.0222	0.012	0.0066	0.0587	0.0083	0.0428	0.0091	0.0242	0.0089	0.0489	0.0172	0.0198	0.0762	0.0801	0.0133	0.023	0.0965	0.0939	0.0607
Cre07.g329250.v5.5:s:2473251-2475703	N3	chromosome_7:2473057-2473251	0.1156	0.0001	0.0001	0.0191	0.0001	0.0278	0.0001	0.0295	0.0278	0.065	0.0139	0.0373	0.0181	0.0683	0.0259	0.0157	0.0264	0.174	0.0201	0.0001	0.0001	0.0001	0.0001	0.0001	0.0001	0.0967	0.0202
Cre07.g329350.v5.5:s:2487368-2487444	N3	chromosome_7:2487255-2487368	0.0001	0.0001	0.0001	0.0336	0.0001	0.0001	0.0001	0.0001	0.0336	0.0192	0.0093	0.0815	0.0143	0.0115	0.0201	0.0103	0.0001	0.0191	0.0623	0.0309	0.0001	0.0001	0.0336	0.0001	0.0001	0.0199	0.0001
Cre07.g329550.v5.5:s:2505111-2507596	N3	chromosome_7:2505007-2505111	0.0001	0.0001	0.0001	0.0001	0.0001	0.0001	0.0001	0.0001	0.0001	0.0001	0.0001	0.1	0.0001	0.1712	0.0001	0.0514	0.0001	0.0747	0.0001	0.0001	0.0001	0.0001	0.0001	0.0001	0.0001	0.0001	0.0001
Cre07.g330450.v5.5:t:2637600-2637710	N3	chromosome_7:2637518-2637600	0.0685	0.1902	0.0518	0.0413	0.0519	0.0774	0.0964	0.0595	0.0954	0.0833	0.0463	0.0854	0.0355	0.0633	0.0475	0.0667	0.1353	0.0121	0.0163	0.1211	0.021	0.025	0.0416	0.0219	0.0228	0.0562	0.0685
Cre07.g330550.v5.5:s:2644383-2644640	N3	chromosome_7:2644640-2644753	0.0078	0.0001	0.0001	0.0598	0.0001	0.0106	0.0105	0.0087	0.071	0.0096	0.0001	0.0923	0.0366	0.0477	0.0061	0.004	0.0001	0.0081	0.0059	0.0072	0.0061	0.0065	0.0041	0.0253	0.0041	0.0034	0.0086
Cre07.g330850.v5.5:s:2682243-2682632	N3	chromosome_7:2681978-2682243	0.0312	0.0001	0.0208	0.0271	0.0152	0.0244	0.0361	0.0206	0.0278	0.004	0.0465	0.0148	0.0149	0.0171	0.0334	0.027	0.0115	0.0153	0.082	0.0256	0.0689	0.0202	0.05	0.0469	0.0212	0.0321	0.0223
Cre07.g330850.v5.5:t:2681853-2681978	N3	chromosome_7:2681978-2682243	0.0256	0.019	0.0119	0.0224	0.0096	0.0248	0.0351	0.0183	0.0211	0.0026	0.0541	0.0123	0.0116	0.0174	0.0306	0.0288	0.0073	0.019	0.0563	0.0241	0.0652	0.017	0.0406	0.057	0.0166	0.0292	0.021
Cre07.g331250.v5.5:s:2734251-2734363	N3	chromosome_7:2734363-2735133	0.0001	0.0001	0.0001	0.0137	0.0177	0.0134	0.0101	0.0705	0.0099	0.0704	0.0348	0.004	0.0762	0.0145	0.0174	0.0112	0.0071	0.0366	0.0214	0.0179	0.0035	0.0029	0.0275	0.0099	0.0085	0.0011	0.0025
Cre07.g331250.v5.5:t:2735133-2735150	N3	chromosome_7:2734363-2735133	0.0001	0.0001	0.0001	0.0139	0.0158	0.0167	0.0114	0.0697	0.0089	0.0718	0.0409	0.0032	0.093	0.016	0.019	0.0126	0.0094	0.0312	0.0201	0.019	0.0037	0.0029	0.0269	0.0092	0.0103	0.0012	0.0027
Cre07.g331300.v5.5:t:2752985-2753117	N3	chromosome_7:2752545-2753012	0.0001	0.0001	0.0001	0.0001	0.0001	0.0001	0.0001	0.0001	0.0001	0.0001	0.0001	0.0001	0.0001	0.0001	0.0001	0.0001	0.0001	0.0001	0.0001	0.0001	0.0001	0.0001	0.0001	0.0001	0.0001	0.276	0.0001
Cre07.g332066.v5.5:t:2839780-2839860	N3	chromosome_7:2839530-2839814	0.0001	0.0001	0.0119	0.0463	0.0104	0.0001	0.0001	0.0001	0.0125	0.0072	0.0052	0.0681	0.0033	0.0165	0.0037	0.0029	0.0083	0.0039	0.0046	0.0079	0.0058	0.0059	0.0026	0.0049	0.0309	0.0035	0.0083
Cre07.g332500.v5.5:s:2896339-2896418	N3	chromosome_7:2896418-2896626	0.0001	0.0339	0.197	0.1709	0.094	0.134	0.1222	0.0584	0.0609	0.0653	0.1296	0.077	0.1064	0.0585	0.0203	0.0339	0.0485	0.0401	0.0095	0.0209	0.0238	0.0001	0.0001	0.0001	0.0001	0.0001	0.0001
Cre07.g332500.v5.5:t:2896902-2897199	N3	chromosome_7:2896703-2896902	0.0001	0.0938	0.0185	0.1407	0.0698	0.1253	0.1041	0.0598	0.061	0.0983	0.0313	0.0807	0.0496	0.029	0.0128	0.0341	0.0167	0.0057	0.028	0.0206	0.0238	0.0001	0.0001	0.0001	0.0001	0.0001	0.0001
Cre07.g332786.v5.5:s:2941202-2941280	N3	chromosome_7:2940989-2941202	0.0362	0.0001	0.0001	0.0118	0.0185	0.0115	0.0123	0.0091	0.0774	0.0119	0.0061	0.0197	0.0289	0.0232	0.0039	0.0202	0.0082	0.0093	0.0189	0.0058	0.025	0.0463	0.0046	0.0483	0.0054	0.0502	0.026
Cre07.g332800.v5.5:t:2943603-2944927	N6	chromosome_7:2943435-2943608	0.2029	0.2206	0.1277	0.1743	0.0001	0.2792	0.2326	0.2894	0.1862	0.1938	0.1306	0.1568	0.2454	0.1208	0.2258	0.2073	0.1522	0.0545	0.227	0.1945	0.1396	0.2453	0.1893	0.1943	0.2674	0.1904	0.2726
Cre07.g333000.v5.5:t:2969237-2969314	N3	chromosome_7:2969062-2969253	0.0001	0.0001	0.0001	0.0358	0.0001	0.0417	0.0001	0.0218	0.0167	0.1254	0.0354	0.0503	0.013	0.0429	0.0142	0.0344	0.0001	0.0515	0.0505	0.02	0.0508	0.0404	0.0364	0.0302	0.104	0.0403	0.0426
Cre07.g333000.v5.5:t:2970008-2970211	N3	chromosome_7:2969860-2970008	0.0001	0.0001	0.0001	0.0261	0.0001	0.0001	0.0238	0.0531	0.0464	0.0174	0.0408	0.006	0.0485	0.0389	0.0138	0.042	0.0001	0.051	0.112	0.0618	0.0626	0.0127	0.0938	0.0487	0.1039	0.0527	0.0111
Cre07.g333850.v5.5:s:3214968-3215323	N2	chromosome_7:3214790-3214968	0.0001	0.0001	0.0001	0.0727	0.0001	0.0001	0.0001	0.0001	0.1583	0.3662	0.2826	0.4309	0.39	0.0001	0.0001	0.0001	0.0001	0.0001	0.2121	0.0001	0.0001	0.0001	0.0001	0.0001	0.0001	0.0001	0.0001
Cre07.g334025.v5.5:s:3230661-3230923	N3	chromosome_7:3230475-3230661	0.1062	0.0001	0.0001	0.0063	0.0001	0.0695	0.0355	0.0142	0.0782	0.0058	0.0055	0.0089	0.0374	0.0449	0.0591	0.0623	0.1455	0.0416	0.0558	0.0462	0.1184	0.0888	0.0047	0.1394	0.0725	0.0722	0.0898
Cre07.g334100.v5.5:t:3237185-3237320	N3	chromosome_7:3236983-3237185	0.0427	0.0001	0.1045	0.0221	0.1674	0.1099	0.1295	0.0735	0.0821	0.0688	0.0893	0.0627	0.0594	0.0981	0.0762	0.0498	0.0712	0.0269	0.0528	0.0001	0.0001	0.0313	0.025	0.0278	0.0001	0.054	0.075
Cre07.g334100.v5.5:t:3237466-3237591	N6	chromosome_7:3237320-3237466	0.2142	0.0001	0.0001	0.3606	0.0001	0.395	0.4106	0.3735	0.5196	0.3657	0.4523	0.4021	0.4011	0.4298	0.3797	0.2845	0.0001	0.4686	0.3769	0.0001	0.2331	0.4251	0.4183	0.3113	0.0001	0.2707	0.0001
Cre07.g334100.v5.5:t:3237927-3238108	N2	chromosome_7:3237807-3237927	0.1101	0.0117	0.067	0.0577	0.0426	0.1134	0.0923	0.0821	0.1214	0.1412	0.1256	0.0817	0.0918	0.1345	0.0911	0.1291	0.0812	0.1374	0.141	0.0871	0.1486	0.1143	0.12	0.0494	0.0152	0.0944	0.1897
Cre07.g334650.v5.5:s:3315416-3316548	N3	chromosome_7:3315221-3315530	0.0001	0.0001	0.0001	0.0001	0.0001	0.0001	0.0001	0.0001	0.0001	0.0144	0.0804	0.0157	0.0105	0.0907	0.0864	0.0087	0.0636	0.1434	0.0478	0.0001	0.0001	0.0001	0.0001	0.0001	0.0001	0.0001	0.0001
Cre07.g335600.v5.5:s:3469754-3469822	N3	chromosome_7:3469822-3469931	0.1457	0.0633	0.2884	0.1235	0.0001	0.2714	0.1656	0.1112	0.1111	0.0001	0.0001	0.0001	0.0606	0.0128	0.0252	0.0143	0.05	0.0411	0.098	0.0448	0.0076	0.0403	0.0414	0.121	0.0355	0.1253	0.1225
Cre07.g335600.v5.5:t:3470090-3470215	N2	chromosome_7:3469986-3470090	0.1362	0.1057	0.2354	0.1252	0.0001	0.1859	0.1978	0.1119	0.0667	0.0001	0.0001	0.0001	0.1014	0.0506	0.0766	0.0834	0.1098	0.0401	0.0978	0.0807	0.0289	0.0408	0.0293	0.0402	0.1687	0.1086	0.108
Cre07.g335850.v5.5:s:3496265-3496415	N3	chromosome_7:3496415-3496631	0.0229	0.0215	0.0257	0.0178	0.0393	0.0149	0.002	0.0485	0.0266	0.0063	0.0061	0.0278	0.0217	0.0718	0.0294	0.0357	0.0698	0.04	0.0762	0.0462	0.0701	0.0624	0.0619	0.0377	0.0431	0.0538	0.0631
Cre07.g336300.v5.5:s:3541952-3542637	N3	chromosome_7:3542637-3543103	0.0001	0.0001	0.0001	0.0419	0.0001	0.0001	0.0001	0.0167	0.0243	0.0096	0.0081	0.0115	0.0107	0.0073	0.0331	0.0272	0.0109	0.0695	0.0082	0.0108	0.0202	0.018	0.0227	0.0462	0.0682	0.0449	0.0135
Cre07.g336300.v5.5:t:3544890-3545046	N2	chromosome_7:3544095-3544895	0.0001	0.0001	0.0001	0.0001	0.0001	0.0001	0.0001	0.1095	0.1723	0.1276	0.1677	0.117	0.0544	0.1211	0.168	0.1655	0.0001	0.0943	0.0974	0.0914	0.0001	0.2591	0.0658	0.0001	0.0001	0.0001	0.0001
Cre07.g337350.v5.5:s:3667045-3667273	N3	chromosome_7:3667273-3667639	0.0001	0.0001	0.0001	0.0104	0.0001	0.0139	0.06	0.0299	0.0055	0.0071	0.0055	0.0034	0.0454	0.0056	0.0242	0.0219	0.1049	0.0329	0.0267	0.0377	0.0658	0.0001	0.1439	0.0114	0.0126	0.1489	0.1049
Cre07.g337350.v5.5:t:3667639-3667792	N3	chromosome_7:3667273-3667639	0.0001	0.0001	0.0001	0.0105	0.0001	0.0139	0.0597	0.0283	0.0056	0.0072	0.0054	0.0033	0.0454	0.006	0.0253	0.022	0.1045	0.0334	0.0267	0.0382	0.0658	0.0001	0.1459	0.011	0.0126	0.1456	0.1035
Cre07.g337350.v5.5:t:3669762-3669953	N3	chromosome_7:3669418-3669762	0.0001	0.0001	0.0001	0.0172	0.0001	0.0001	0.1109	0.0388	0.03	0.0389	0.0099	0.0055	0.011	0.0066	0.0381	0.0246	0.0001	0.0289	0.0882	0.0863	0.0175	0.0001	0.1191	0.0001	0.093	0.0601	0.0001
Cre07.g337582.v5.5:s:3692719-3692991	N7	chromosome_7:3692991-3693349	0.0001	0.0001	0.0001	0.0182	0.0001	0.0001	0.0001	0.0001	0.0001	0.0001	0.0001	0.0001	0.0001	0.0001	0.0126	0.1427	0.0001	0.2585	0.2518	0.0001	0.0081	0.0803	0.0134	0.1117	0.2689	0.1554	0.062
Cre07.g337582.v5.5:t:3694596-3694964	N3	chromosome_7:3694153-3694887	0.0001	0.0001	0.0001	0.0793	0.0001	0.0001	0.0001	0.0001	0.0001	0.0001	0.0001	0.0001	0.0001	0.0001	0.0125	0.0598	0.0001	0.0664	0.0901	0.0001	0.037	0.1123	0.0125	0.0593	0.1352	0.0776	0.2073
Cre07.g338700.v5.5:s:3854904-3854985	N3	chromosome_7:3854761-3854904	0.0001	0.0001	0.0001	0.0001	0.0001	0.0001	0.0001	0.0001	0.0001	0.0001	0.0001	0.4468	0.0001	0.0001	0.0001	0.0001	0.0001	0.0001	0.0001	0.0001	0.0001	0.0001	0.0001	0.0001	0.0001	0.0001	0.0001
Cre07.g338800.v5.5:s:3862015-3862288	N4	chromosome_7:3861872-3862015	0.0001	0.0001	0.0001	0.0001	0.0001	0.0001	0.0001	0.0001	0.0001	0.0001	0.0001	0.5147	0.0001	0.2878	0.6837	0.4718	0.0001	0.4187	0.0001	0.0001	0.0001	0.0001	0.3235	0.0001	0.0001	0.4592	0.0001
Cre07.g339104.v5.5:t:3916050-3916172	N7	chromosome_7:3915824-3916050	0.0001	0.0001	0.0001	0.0001	0.0001	0.0001	0.0001	0.0001	0.0001	0.0001	0.0001	0.1834	0.0001	0.0001	0.0001	0.0001	0.0001	0.0001	0.0001	0.0001	0.0001	0.0001	0.2525	0.0001	0.0001	0.2863	0.0001
Cre07.g339750.v5.5:s:3979898-3980082	N2	chromosome_7:3980082-3980370	0.2064	0.1798	0.2267	0.1788	0.1128	0.1437	0.0845	0.1144	0.0969	0.0645	0.0669	0.0717	0.1334	0.0001	0.1289	0.0084	0.0554	0.133	0.0087	0.0967	0.0714	0.0373	0.0302	0.0706	0.0754	0.0312	0.0409
Cre07.g340900.v5.5:t:4409092-4409745	N3	chromosome_7:4408763-4409092	0.005	0.0047	0.0737	0.0036	0.0119	0.0233	0.0857	0.0419	0.0194	0.0258	0.0093	0.0196	0.0049	0.0133	0.012	0.0126	0.0096	0.0176	0.0362	0.0532	0.0119	0.0538	0.0293	0.0001	0.1061	0.0754	0.0236
Cre07.g340900.v5.5:t:4412724-4413261	N3	chromosome_7:4412386-4412724	0.097	0.1318	0.0667	0.1257	0.0399	0.0598	0.0614	0.0624	0.0527	0.0452	0.0394	0.0658	0.0814	0.0369	0.042	0.065	0.1048	0.0424	0.0058	0.0573	0.0001	0.0001	0.0967	0.0001	0.0001	0.102	0.0001
Cre07.g341100.v5.5:s:4385602-4385838	N6	chromosome_7:4385838-4386255	0.105	0.1382	0.2081	0.3054	0.2288	0.2614	0.2824	0.2977	0.2361	0.2272	0.1915	0.1932	0.1946	0.2066	0.2571	0.2632	0.1977	0.305	0.2377	0.1913	0.1788	0.1698	0.1677	0.1989	0.169	0.1681	0.1671
Cre07.g341600.v5.5:t:4277756-4277857	N1	chromosome_7:4277661-4277756	0.4019	0.368	0.4154	0.3975	0.3582	0.3716	0.3679	0.3296	0.3377	0.2703	0.327	0.4373	0.3402	0.3413	0.3771	0.3628	0.3481	0.3602	0.3494	0.303	0.3175	0.283	0.3349	0.4163	0.2946	0.4131	0.3778
Cre07.g341650.v5.5:t:4274828-4275222	N3	chromosome_7:4274743-4274990	0.0022	0.022	0.004	0.0541	0.0299	0.0152	0.0178	0.0153	0.0042	0.0215	0.0082	0.0105	0.0265	0.0028	0.0032	0.0122	0.0141	0.0237	0.0111	0.0134	0.0132	0.0131	0.0033	0.0035	0.0034	0.0174	0.0218
Cre07.g341700.v5.5:s:4267227-4267549	N3	chromosome_7:4267103-4267227	0.0001	0.0001	0.0001	0.0001	0.0001	0.0001	0.0001	0.0001	0.0001	0.019	0.0547	0.0193	0.0073	0.0063	0.0086	0.0055	0.0125	0.0107	0.0364	0.0471	0.0278	0.0001	0.0001	0.0001	0.0001	0.0001	0.0001
Cre07.g341952.v5.5:s:4421751-4421926	N3	chromosome_7:4421926-4422536	0.0001	0.0001	0.0001	0.0649	0.0001	0.1081	0.0912	0.0158	0.0628	0.0144	0.0554	0.0341	0.0185	0.0332	0.0543	0.0934	0.0149	0.0437	0.0445	0.082	0.0423	0.0985	0.0318	0.1356	0.0626	0.0776	0.0537
Cre07.g342700.v5.5:s:4138809-4138928	N3	chromosome_7:4138318-4138809	0.0001	0.0001	0.0001	0.0001	0.0001	0.0001	0.0001	0.0001	0.0001	0.0001	0.0001	0.0138	0.0001	0.0001	0.0001	0.3218	0.0001	0.0001	0.0001	0.0001	0.0001	0.0001	0.0001	0.0001	0.0001	0.0775	0.0001
Cre07.g342750.v5.5:s:4130916-4131071	N3	chromosome_7:4130729-4130916	0.0001	0.0001	0.0001	0.0303	0.0001	0.0001	0.0001	0.0532	0.0118	0.0255	0.0549	0.0234	0.0101	0.0429	0.0115	0.0317	0.0745	0.0092	0.0152	0.0098	0.0128	0.0124	0.0614	0.0095	0.0356	0.007	0.0208
Cre07.g342750.v5.5:s:4133578-4133775	N3	chromosome_7:4133494-4133578	0.0001	0.0001	0.0001	0.0001	0.0001	0.0001	0.0001	0.2846	0.1338	0.0152	0.0397	0.0107	0.0765	0.0556	0.0733	0.083	0.0274	0.1004	0.0308	0.0001	0.0192	0.0688	0.0296	0.0167	0.0627	0.0824	0.0001
Cre07.g342800.v5.5:t:4128231-4128433	N3	chromosome_7:4127913-4128231	0.0001	0.0001	0.0001	0.0001	0.0001	0.0001	0.0001	0.0714	0.0001	0.0251	0.0001	0.149	0.0256	0.0917	0.026	0.1	0.0001	0.0143	0.0207	0.0142	0.0328	0.0112	0.0201	0.0052	0.0356	0.0301	0.0209
Cre07.g342800.v5.5:t:4128992-4129511	N4	chromosome_7:4128433-4128992	0.0001	0.0001	0.0001	0.0001	0.0001	0.0001	0.0001	0.5741	0.2075	0.251	0.0001	0.5811	0.0001	0.3271	0.4058	0.3062	0.0001	0.3604	0.339	0.3684	0.3646	0.4674	0.4126	0.3832	0.4242	0.4083	0.4026
Cre07.g343333.v5.5:t:4476933-4477286	N2	chromosome_7:4476700-4476936	0.0001	0.0001	0.0001	0.0001	0.0001	0.0001	0.0001	0.0001	0.0001	0.0001	0.0001	0.2237	0.2852	0.2118	0.1294	0.2307	0.0001	0.3077	0.0001	0.0001	0.0001	0.0001	0.0001	0.0001	0.0001	0.0001	0.0001
Cre07.g343333.v5.5:t:4478075-4478265	N3	chromosome_7:4477844-4478075	0.0001	0.0001	0.0001	0.0001	0.0001	0.0001	0.0001	0.0001	0.0001	0.0001	0.0923	0.0999	0.0747	0.0121	0.0175	0.0809	0.0001	0.0188	0.0668	0.0001	0.0001	0.0001	0.0001	0.0001	0.0001	0.0001	0.0001
Cre07.g344100.v5.5:s:4594908-4595011	N7	chromosome_7:4594760-4594908	0.0001	0.0001	0.0001	0.0001	0.0001	0.0001	0.0001	0.0001	0.0001	0.0001	0.0001	0.0001	0.0001	0.0001	0.0001	0.0001	0.0001	0.0001	0.0001	0.0001	0.0001	0.0001	0.4606	0.0001	0.225	0.4688	0.0001
Cre07.g344100.v5.5:s:4601612-4601692	N3	chromosome_7:4601262-4601612	0.0001	0.0001	0.0001	0.0457	0.0001	0.0001	0.0001	0.0001	0.0001	0.0001	0.0001	0.0001	0.0001	0.0001	0.0001	0.0001	0.0001	0.0001	0.0001	0.0001	0.0001	0.0001	0.0001	0.2066	0.0001	0.1091	0.2761
Cre07.g344634.v5.5:t:4673308-4673740	N3	chromosome_7:4673077-4673308	0.0001	0.0001	0.0001	0.0001	0.0001	0.0001	0.0001	0.0001	0.0001	0.0001	0.0001	0.3125	0.0001	0.0001	0.0001	0.0001	0.0001	0.0001	0.0001	0.0001	0.0001	0.0001	0.0001	0.0001	0.0001	0.0001	0.0001
Cre07.g344702.v5.5:s:4681149-4681212	N3	chromosome_7:4681212-4681700	0.0001	0.0001	0.0001	0.0001	0.0001	0.0001	0.0001	0.0001	0.0001	0.0001	0.0001	0.2997	0.0001	0.0001	0.0001	0.3118	0.0001	0.0001	0.0001	0.0001	0.0001	0.0001	0.0001	0.0001	0.0001	0.0001	0.0001
Cre07.g344702.v5.5:t:4681700-4681823	N2	chromosome_7:4681212-4681700	0.0001	0.0001	0.0001	0.0001	0.0001	0.0001	0.0001	0.0001	0.0001	0.0001	0.0001	0.2536	0.2935	0.2431	0.107	0.2897	0.0001	0.1673	0.2381	0.0001	0.0001	0.0001	0.0001	0.0001	0.0001	0.0001	0.0001
Cre07.g345000.v5.5:s:4710976-4711275	N3	chromosome_7:4710898-4711182	0.1083	0.0001	0.0001	0.0072	0.0001	0.0001	0.0001	0.0001	0.0001	0.0001	0.0001	0.1374	0.008	0.0001	0.1095	0.1452	0.0001	0.0083	0.0483	0.0001	0.0549	0.0001	0.0396	0.0852	0.039	0.0035	0.0345
Cre07.g345050.v5.5:s:4722985-4723887	N2	chromosome_7:4722688-4723190	0.0605	0.0993	0.0496	0.0245	0.1164	0.0345	0.0383	0.0702	0.081	0.045	0.1214	0.0678	0.1567	0.0552	0.0767	0.119	0.148	0.0887	0.0818	0.0491	0.0219	0.0703	0.0376	0.0803	0.1271	0.0664	0.0682
Cre07.g345300.v5.5:s:4742972-4743235	N3	chromosome_7:4742612-4742972	0.0001	0.0001	0.0001	0.0919	0.0001	0.0001	0.2518	0.0001	0.0001	0.0278	0.0001	0.0147	0.2317	0.0001	0.0001	0.0001	0.0001	0.1536	0.0286	0.0001	0.0758	0.0001	0.1323	0.0001	0.0216	0.0765	0.0001
Cre07.g345350.v5.5:t:4749736-4750009	N3	chromosome_7:4749408-4749736	0.0384	0.0001	0.0228	0.0129	0.0001	0.0227	0.0001	0.0215	0.0001	0.0885	0.0649	0.0614	0.0193	0.0795	0.0629	0.102	0.1383	0.0152	0.0202	0.193	0.1125	0.0905	0.0546	0.0866	0.0783	0.0546	0.0674
Cre07.g345700.v5.5:s:4800870-4801094	N3	chromosome_7:4800470-4800870	0.0797	0.017	0.0524	0.0093	0.0001	0.0484	0.0118	0.0386	0.1035	0.0098	0.0329	0.0272	0.0428	0.0505	0.0141	0.0111	0.0001	0.0166	0.0178	0.021	0.017	0.019	0.0096	0.0168	0.0128	0.0106	0.015
Cre07.g346317.v5.5:t:4909803-4909867	N3	chromosome_7:4909715-4909803	0.0001	0.0001	0.0001	0.0001	0.0001	0.0001	0.0001	0.0001	0.0311	0.0001	0.0169	0.2585	0.0177	0.0173	0.0152	0.0359	0.0388	0.0187	0.0209	0.025	0.0239	0.0001	0.0251	0.0001	0.0001	0.0001	0.0001
Cre07.g346350.v5.5:s:4915055-4915181	N3	chromosome_7:4914829-4915055	0.534	0.0001	0.0001	0.0001	0.0001	0.0001	0.0001	0.0001	0.1096	0.0001	0.032	0.0297	0.0686	0.0458	0.0239	0.0326	0.0578	0.0545	0.0155	0.0178	0.0135	0.0193	0.0103	0.0247	0.0204	0.0073	0.0216
Cre07.g346698.v5.5:s:4961036-4961456	N3	chromosome_7:4961306-4961667	0.0176	0.0001	0.0001	0.2505	0.0001	0.0104	0.0116	0.0001	0.0001	0.0001	0.0001	0.0001	0.0001	0.0001	0.0001	0.0372	0.0001	0.0197	0.0001	0.0114	0.0292	0.0072	0.044	0.0169	0.0056	0.0084	0.0001
Cre07.g346800.v5.5:t:4977593-4977651	N7	chromosome_7:4977283-4977593	0.0001	0.0001	0.0001	0.1667	0.0001	0.0001	0.0001	0.0001	0.0669	0.1519	0.013	0.0344	0.1158	0.1096	0.1805	0.0956	0.1156	0.0893	0.1045	0.0898	0.1339	0.1297	0.0747	0.1377	0.0842	0.1196	0.1678
Cre07.g347200.v5.5:t:5026345-5026421	N2	chromosome_7:5026201-5026345	0.0001	0.0001	0.0001	0.1114	0.0001	0.0001	0.0001	0.1494	0.0845	0.0595	0.0956	0.0494	0.0774	0.0819	0.2359	0.227	0.0001	0.3238	0.2497	0.1875	0.0001	0.0001	0.2183	0.1392	0.0001	0.1938	0.0001
Cre07.g347250.v5.5:t:5031552-5031620	N7	chromosome_7:5031620-5031763	0.0448	0.0263	0.0171	0.0219	0.0099	0.0054	0.0121	0.0278	0.0444	0.0247	0.0035	0.0141	0.0091	0.0779	0.0541	0.0592	0.0547	0.0925	0.0939	0.0959	0.2033	0.0915	0.1187	0.1567	0.2398	0.1881	0.1672
Cre07.g347300.v5.5:t:5037686-5037777	N6	chromosome_7:5037379-5037686	0.6996	0.3907	0.3899	0.5257	0.0001	0.0001	0.4838	0.4444	0.6657	0.2441	0.3397	0.3791	0.3903	0.0001	0.1983	0.1848	0.1823	0.1194	0.1286	0.1739	0.2379	0.1895	0.1967	0.4383	0.56	0.3709	0.2464
Cre07.g347500.v5.5:s:5055566-5055745	N3	chromosome_7:5055506-5055566	0.0018	0.0075	0.0197	0.0095	0.0105	0.0117	0.0199	0.0476	0.0142	0.0165	0.0076	0.0095	0.0092	0.0197	0.0145	0.0248	0.0001	0.0109	0.0078	0.008	0.0262	0.0056	0.058	0.0053	0.028	0.0031	0.0457
Cre07.g347600.v5.5:t:5072462-5074113	N2	chromosome_7:5072190-5072690	0.0001	0.0001	0.0001	0.0001	0.0001	0.0001	0.0001	0.0001	0.1637	0.2828	0.2649	0.277	0.3577	0.2047	0.1068	0.1803	0.0001	0.0001	0.0115	0.0001	0.0001	0.0001	0.0001	0.0001	0.0001	0.0001	0.0001
Cre07.g348550.v5.5:t:5195812-5195971	N3	chromosome_7:5195971-5196391	0.0001	0.0001	0.0001	0.0001	0.0001	0.0001	0.0001	0.0001	0.0962	0.0105	0.1516	0.0888	0.0665	0.0498	0.0114	0.0126	0.0001	0.0001	0.0001	0.0001	0.0001	0.0001	0.0147	0.0001	0.0001	0.0115	0.0001
Cre07.g348650.v5.5:t:5207830-5210216	N2	chromosome_7:5207716-5207830	0.0001	0.0001	0.0001	0.114	0.0001	0.0001	0.0001	0.2419	0.1663	0.1794	0.0001	0.279	0.0001	0.1048	0.1318	0.0643	0.104	0.068	0.2071	0.0001	0.0001	0.0001	0.1467	0.0859	0.1324	0.1366	0.0825
Cre07.g348700.v5.5:s:5211588-5211935	N7	chromosome_7:5211338-5211588	0.2738	0.3016	0.0001	0.1848	0.0001	0.0001	0.0001	0.1088	0.1154	0.0001	0.1951	0.2183	0.0001	0.0001	0.0713	0.0497	0.0001	0.1146	0.1555	0.0001	0.1316	0.0001	0.4212	0.0001	0.0001	0.34	0.1256
Cre07.g349000.v5.5:t:5239290-5239403	N7	chromosome_7:5239403-5239685	0.1045	0.0227	0.0001	0.1019	0.0001	0.0168	0.0696	0.0523	0.0001	0.0001	0.0109	0.036	0.0096	0.0087	0.1334	0.1282	0.0001	0.0674	0.0498	0.0747	0.0579	0.1342	0.0595	0.0855	0.1052	0.0573	0.0275
Cre07.g349152.v5.5:t:5265610-5265944	N3	chromosome_7:5265456-5265610	0.0001	0.0001	0.0001	0.0001	0.0001	0.0001	0.0001	0.0001	0.0001	0.0001	0.0001	0.3475	0.0001	0.0001	0.0001	0.0001	0.0001	0.0001	0.0001	0.0001	0.0001	0.0001	0.0001	0.0001	0.0001	0.0001	0.0001
Cre07.g350000.v5.5:s:5360920-5361102	N7	chromosome_7:5359155-5360920	0.0001	0.0001	0.0001	0.0001	0.0001	0.0001	0.0001	0.0001	0.0001	0.0001	0.0001	0.025	0.0001	0.1894	0.058	0.05	0.0001	0.0163	0.0958	0.0278	0.0001	0.2501	0.0483	0.1665	0.1667	0.2164	0.0001
Cre07.g350050.v5.5:s:5367687-5367764	N3	chromosome_7:5367604-5367687	0.0001	0.0001	0.0001	0.0001	0.0001	0.0001	0.013	0.0094	0.0578	0.0082	0.0318	0.207	0.0467	0.0043	0.0642	0.0336	0.0545	0.0058	0.0476	0.0114	0.0209	0.0114	0.01	0.0114	0.0097	0.0052	0.0569
Cre07.g350050.v5.5:s:5368190-5368264	N7	chromosome_7:5368069-5368190	0.0001	0.0001	0.0001	0.0001	0.0001	0.0001	0.0001	0.0757	0.1595	0.0111	0.0888	0.0635	0.0844	0.0435	0.0897	0.0272	0.1864	0.1344	0.0111	0.1006	0.1023	0.1529	0.1491	0.0954	0.0115	0.1445	0.0428
Cre07.g350700.v5.5:s:5463719-5463959	N7	chromosome_7:5463959-5464153	0.0001	0.0001	0.0001	0.0001	0.0001	0.0001	0.0001	0.0001	0.0001	0.0001	0.0001	0.0001	0.0001	0.0001	0.0001	0.1806	0.0211	0.1507	0.0657	0.0001	0.0001	0.0636	0.1384	0.0577	0.1427	0.1263	0.0606
Cre07.g350700.v5.5:t:5461428-5462186	N3	chromosome_7:5461275-5461428	0.0391	0.0001	0.0001	0.0001	0.0001	0.0001	0.0001	0.0001	0.0001	0.0001	0.0001	0.029	0.0001	0.0001	0.0001	0.1367	0.0338	0.0216	0.0361	0.0001	0.0001	0.0001	0.0579	0.0001	0.0315	0.0333	0.0001
Cre07.g350700.v5.5:t:5464153-5464240	N7	chromosome_7:5463959-5464153	0.0001	0.0001	0.0001	0.0001	0.0001	0.0001	0.0001	0.0001	0.0001	0.0001	0.0001	0.0001	0.0001	0.0001	0.0001	0.1813	0.0207	0.1476	0.0677	0.0001	0.0001	0.0633	0.1381	0.0579	0.1452	0.1275	0.0598
Cre07.g351000.v5.5:s:5507416-5508104	N3	chromosome_7:5507262-5507416	0.0437	0.0487	0.0545	0.0186	0.0532	0.0481	0.05	0.037	0.0755	0.0118	0.0369	0.0235	0.0109	0.0347	0.0039	0.0028	0.0081	0.0282	0.0417	0.0072	0.0437	0.0061	0.0318	0.0051	0.0184	0.022	0.0432
Cre07.g352150.v5.5:t:5631722-5631956	N4	chromosome_7:5631956-5632344	0.7354	0.0001	0.0001	0.0001	0.0001	0.0001	0.0001	0.0001	0.0001	0.0001	0.0001	0.6491	0.0001	0.0001	0.0001	0.4792	0.0001	0.34	0.0001	0.0001	0.3441	0.3216	0.329	0.3658	0.3171	0.2849	0.2912
Cre07.g352250.v5.5:t:5642368-5642403	N2	chromosome_7:5642403-5642762	0.2708	0.0001	0.0001	0.0001	0.0001	0.0001	0.0001	0.0001	0.0001	0.0001	0.0001	0.901	0.0001	0.0001	0.0001	0.0001	0.0001	0.0001	0.0001	0.0001	0.0001	0.0001	0.0001	0.0001	0.1568	0.0001	0.0001
Cre07.g352400.v5.5:s:5673096-5673409	N3	chromosome_7:5673409-5673937	0.0001	0.0001	0.0001	0.0963	0.0001	0.0099	0.0146	0.0119	0.0121	0.0445	0.0259	0.0485	0.0235	0.0279	0.0061	0.0289	0.0118	0.0089	0.0492	0.0151	0.0196	0.0665	0.0101	0.0364	0.0533	0.0098	0.0146
Cre07.g352400.v5.5:t:5673937-5674069	N3	chromosome_7:5673409-5673937	0.0229	0.0001	0.0001	0.0806	0.0001	0.0146	0.0156	0.0167	0.0169	0.0372	0.0241	0.0533	0.019	0.022	0.0102	0.0237	0.0206	0.0111	0.0432	0.0208	0.0254	0.0676	0.0111	0.0402	0.0535	0.0112	0.0163
Cre07.g352600.v5.5:s:5697829-5698173	N7	chromosome_7:5697689-5697829	0.2729	0.0001	0.0001	0.0939	0.0001	0.0001	0.0001	0.0001	0.0001	0.0001	0.0001	0.1393	0.0001	0.0355	0.0001	0.2636	0.0001	0.3148	0.0001	0.0001	0.0295	0.0001	0.1	0.0001	0.2259	0.0001	0.0001
Cre07.g353600.v5.5:s:5854709-5855060	N7	chromosome_7:5854529-5854709	0.1353	0.0001	0.0001	0.0254	0.0001	0.0001	0.0001	0.0001	0.0001	0.1251	0.0198	0.2147	0.0278	0.0001	0.0001	0.194	0.0001	0.0001	0.125	0.0001	0.0001	0.0001	0.0001	0.0001	0.2365	0.1509	0.1981
Cre07.g353850.v5.5:s:5887254-5887433	N3	chromosome_7:5886877-5887254	0.0001	0.0001	0.0001	0.0222	0.0001	0.0001	0.0001	0.0001	0.0001	0.0001	0.0001	0.0442	0.0001	0.0926	0.0001	0.089	0.0001	0.0174	0.0168	0.0001	0.011	0.0116	0.0772	0.0616	0.0911	0.1193	0.0721
Cre07.g354050.v5.5:s:5904843-5909070	N3	chromosome_7:5909060-5909290	0.0001	0.0001	0.0001	0.0001	0.0001	0.0001	0.0001	0.1863	0.1523	0.0001	0.2526	0.1881	0.0001	0.0572	0.0001	0.0978	0.0001	0.1544	0.0001	0.0001	0.0001	0.0001	0.0101	0.0001	0.0001	0.0001	0.0001
Cre07.g354100.v5.5:s:5917823-5917992	N3	chromosome_7:5917484-5917823	0.0183	0.0155	0.0406	0.0298	0.0204	0.0175	0.0155	0.011	0.0102	0.01	0.0241	0.0143	0.0089	0.012	0.0087	0.0138	0.0219	0.0315	0.0344	0.0298	0.0066	0.0069	0.0381	0.0264	0.0399	0.0424	0.0655
Cre07.g354500.v5.5:s:5959040-5959118	N3	chromosome_7:5958722-5959040	0.0142	0.011	0.0054	0.0039	0.0078	0.0063	0.0049	0.0055	0.0056	0.0059	0.0503	0.0151	0.0246	0.0447	0.0324	0.0048	0.0112	0.0359	0.0532	0.1254	0.0367	0.0389	0.0251	0.0857	0.0514	0.0616	0.0699
Cre07.g354550.v5.5:s:5968254-5968359	N3	chromosome_7:5968132-5968258	0.0001	0.0001	0.0001	0.0099	0.0001	0.0306	0.0001	0.0402	0.0094	0.0057	0.0043	0.0565	0.0186	0.0227	0.0081	0.0203	0.0181	0.0349	0.0165	0.0208	0.0001	0.0001	0.0001	0.0001	0.0001	0.0001	0.0001
Cre07.g354550.v5.5:s:5971891-5972022	N3	chromosome_7:5971796-5971891	0.0001	0.0001	0.0001	0.0352	0.0001	0.0001	0.0001	0.0001	0.0001	0.0938	0.1008	0.1047	0.05	0.0229	0.0001	0.0238	0.0001	0.0244	0.0001	0.0001	0.0001	0.0001	0.0001	0.0001	0.0001	0.0001	0.0001
Cre07.g354550.v5.5:t:5971049-5971270	N3	chromosome_7:5971270-5971668	0.0001	0.0001	0.0001	0.0352	0.0001	0.0001	0.0001	0.0001	0.0001	0.0333	0.016	0.1047	0.0171	0.0228	0.0001	0.0238	0.0001	0.0251	0.0001	0.0001	0.0001	0.0001	0.0001	0.0001	0.0001	0.0001	0.0001
Cre07.g355050.v5.5:t:6047034-6048115	N5	chromosome_7:6045816-6047034	0.0447	0.0001	0.0001	0.2055	0.0001	0.0001	0.0001	0.0001	0.0744	0.0001	0.007	0.0546	0.0092	0.0947	0.3892	0.4976	0.4603	0.5461	0.5128	0.5255	0.4382	0.5024	0.4612	0.351	0.5002	0.2812	0.3694
Cre07.g356150.v5.5:s:6171020-6171142	N3	chromosome_7:6170754-6171020	0.0001	0.0221	0.0122	0.0042	0.0115	0.0058	0.0188	0.0155	0.0039	0.0047	0.0034	0.0569	0.0036	0.0048	0.0069	0.005	0.0185	0.0087	0.0068	0.0001	0.0001	0.0152	0.011	0.0001	0.0001	0.0138	0.022
Cre07.g356250.v5.5:t:6187883-6188038	N3	chromosome_7:6187542-6187883	0.0001	0.0001	0.0001	0.0001	0.0001	0.0001	0.0001	0.047	0.0307	0.0167	0.0348	0.013	0.0311	0.0134	0.0262	0.0386	0.0708	0.1199	0.0138	0.0456	0.0086	0.0091	0.0219	0.0088	0.0284	0.0367	0.0229
Cre07.g356550.v5.5:s:6242738-6242789	N3	chromosome_7:6242789-6243195	0.0078	0.0001	0.0001	0.0194	0.0001	0.0001	0.0001	0.0001	0.0001	0.0001	0.0001	0.1169	0.0221	0.0224	0.0664	0.0455	0.0001	0.0001	0.0777	0.0197	0.0102	0.0242	0.0337	0.0159	0.0357	0.0734	0.0101
Cre07.g356550.v5.5:t:6243195-6243408	N3	chromosome_7:6242789-6243195	0.0147	0.0001	0.0001	0.0211	0.0001	0.14	0.0001	0.0251	0.0001	0.0001	0.0262	0.0976	0.0281	0.0297	0.05	0.0271	0.0001	0.02	0.125	0.0248	0.0158	0.0151	0.0265	0.0091	0.0364	0.0597	0.014
Cre07.g356550.v5.5:t:6249131-6251000	N6	chromosome_7:6248895-6249131	0.2637	0.3403	0.2338	0.2539	0.0001	0.3304	0.236	0.3188	0.3065	0.3668	0.4198	0.1725	0.3085	0.3563	0.2763	0.4374	0.0001	0.3856	0.3368	0.4664	0.2723	0.4103	0.3702	0.3221	0.3265	0.4375	0.3324
Cre07.g356960.v5.5:s:6304060-6304360	N3	chromosome_7:6303283-6304060	0.0001	0.0001	0.0001	0.0001	0.0001	0.0001	0.0001	0.0001	0.0001	0.0001	0.0001	0.112	0.0001	0.1667	0.1728	0.1178	0.0001	0.0857	0.0001	0.0001	0.0001	0.0001	0.0001	0.0001	0.0001	0.0001	0.0001
Cre07.g356960.v5.5:t:6302657-6303283	N3	chromosome_7:6303283-6304060	0.0001	0.0001	0.0001	0.0001	0.0001	0.0001	0.0001	0.0001	0.0001	0.0001	0.0001	0.1026	0.0001	0.1449	0.1442	0.117	0.0001	0.0836	0.1451	0.0001	0.0001	0.0001	0.0001	0.0001	0.0001	0.0001	0.0001
Cre07.g357157.v5.5:t:6327367-6327466	N3	chromosome_7:6327090-6327421	0.0001	0.0001	0.0001	0.0077	0.0263	0.0104	0.0138	0.0092	0.0087	0.01	0.1252	0.006	0.0099	0.0063	0.0094	0.0076	0.0001	0.0139	0.0155	0.022	0.0207	0.0099	0.0081	0.0066	0.0074	0.0025	0.0071
Cre07.g357900.v5.5:t:6399120-6400419	N3	chromosome_7:6399000-6399126	0.0229	0.0223	0.008	0.0097	0.0098	0.0234	0.0182	0.015	0.0558	0.0144	0.011	0.0447	0.0109	0.0083	0.0084	0.0158	0.0212	0.0063	0.0414	0.0177	0.014	0.0353	0.0299	0.0171	0.0187	0.0153	0.021
Cre07.g358050.v5.5:s:6419089-6419174	N3	chromosome_7:6419170-6419571	0.0001	0.0001	0.0001	0.0001	0.0001	0.0001	0.0001	0.0001	0.0001	0.0001	0.0001	0.0845	0.0148	0.0001	0.2146	0.148	0.0001	0.0001	0.3005	0.0001	0.0081	0.1328	0.0089	0.0811	0.0078	0.0614	0.0105
Cre07.g358050.v5.5:t:6419571-6421148	N3	chromosome_7:6419170-6419571	0.0147	0.0192	0.0139	0.0057	0.0155	0.04	0.0099	0.0084	0.0112	0.0149	0.0076	0.0187	0.0068	0.0653	0.0551	0.0672	0.0827	0.0297	0.11	0.0059	0.0035	0.0591	0.0033	0.0248	0.0026	0.0243	0.0027
Cre08.g358500.v5.5:t:449521-450845	N3	chromosome_8:448890-449521	0.0001	0.0001	0.0001	0.0001	0.0001	0.0001	0.0001	0.0001	0.1479	0.0001	0.1323	0.0595	0.0001	0.0656	0.0699	0.1011	0.1039	0.1278	0.0711	0.1486	0.0556	0.0774	0.034	0.0001	0.093	0.0151	0.1656
Cre08.g358532.v5.5:t:109936-110239	N3	chromosome_8:109825-109936	0.0355	0.0001	0.0001	0.016	0.0001	0.0201	0.0199	0.0127	0.0522	0.0134	0.1148	0.2183	0.0143	0.0001	0.0001	0.0166	0.0001	0.0214	0.024	0.0751	0.0835	0.025	0.0385	0.1136	0.0737	0.0092	0.025
Cre08.g358556.v5.5:t:260942-261027	N4	chromosome_8:260862-260947	0.1905	0.1451	0.1493	0.1972	0.1326	0.1471	0.1301	0.1645	0.1588	0.1303	0.1205	0.1881	0.1598	0.176	0.1824	0.2212	0.1525	0.2075	0.1925	0.1833	0.1506	0.1882	0.1979	0.1417	0.1644	0.1752	0.1751
Cre08.g358567.v5.5:s:319961-320032	N2	chromosome_8:319800-319961	0.0001	0.0001	0.0001	0.0001	0.0001	0.0001	0.0001	0.0001	0.0001	0.0001	0.0001	0.2899	0.0001	0.3549	0.0867	0.3152	0.0001	0.0001	0.2331	0.0001	0.0001	0.0001	0.0001	0.0001	0.0001	0.1304	0.0001
Cre08.g358800.v5.5:t:491153-491203	N4	chromosome_8:490778-491153	0.2167	0.0001	0.0001	0.2532	0.0001	0.0001	0.0001	0.0001	0.0001	0.0001	0.1912	0.3036	0.3673	0.2261	0.2005	0.3468	0.0001	0.397	0.2247	0.0001	0.2273	0.1901	0.3122	0.0001	0.1994	0.4819	0.0001
Cre08.g358900.v5.5:s:501081-501121	N3	chromosome_8:500892-501081	0.0001	0.0001	0.0001	0.0001	0.0001	0.0001	0.014	0.0486	0.0159	0.0262	0.0845	0.0345	0.0381	0.0209	0.0289	0.0378	0.0403	0.0622	0.0652	0.0816	0.0841	0.1111	0.0786	0.0096	0.073	0.073	0.0001
Cre08.g358950.v5.5:t:503947-504003	N2	chromosome_8:503381-503947	0.0001	0.0001	0.0001	0.1952	0.0001	0.1887	0.2314	0.2268	0.2099	0.2524	0.1158	0.3159	0.3415	0.2059	0.2466	0.1767	0.0001	0.2518	0.0001	0.0001	0.3265	0.1944	0.0001	0.3431	0.2381	0.0001	0.0001
Cre08.g359650.v5.5:t:603455-603971	N3	chromosome_8:603971-604223	0.0969	0.0001	0.0208	0.0124	0.0001	0.0252	0.0001	0.0215	0.0001	0.0001	0.0001	0.0192	0.0001	0.0001	0.0001	0.0001	0.0001	0.0001	0.0001	0.0001	0.0001	0.0001	0.0001	0.0001	0.0001	0.0001	0.0001
Cre08.g360450.v5.5:s:723475-723570	N3	chromosome_8:723566-724168	0.0285	0.0001	0.0001	0.0182	0.0001	0.0221	0.0139	0.0119	0.0128	0.0001	0.0278	0.0198	0.0001	0.1011	0.0431	0.1383	0.0001	0.1663	0.0833	0.0001	0.0001	0.0001	0.0199	0.0168	0.0166	0.0279	0.0569
Cre08.g360450.v5.5:t:724023-724598	N3	chromosome_8:723566-724168	0.0283	0.0001	0.0001	0.0174	0.0001	0.0224	0.0139	0.0115	0.0127	0.0001	0.0278	0.0185	0.0001	0.1021	0.0406	0.1396	0.0001	0.159	0.0794	0.0001	0.0001	0.0001	0.0197	0.0166	0.0166	0.0283	0.0555
Cre08.g360550.v5.5:s:752030-752199	N3	chromosome_8:751825-752030	0.0001	0.0001	0.0001	0.0001	0.0001	0.0001	0.0001	0.0001	0.0001	0.0001	0.0001	0.0001	0.0001	0.0089	0.0284	0.0028	0.0369	0.0063	0.1232	0.007	0.0333	0.0081	0.0185	0.0041	0.0454	0.0401	0.0094
Cre08.g361551.v5.5:t:912127-912218	N3	chromosome_8:912218-912376	0.0001	0.0001	0.0001	0.1142	0.0001	0.0001	0.0235	0.2192	0.0001	0.1388	0.1135	0.0498	0.107	0.0229	0.1047	0.0965	0.0001	0.0598	0.0249	0.0001	0.0001	0.0001	0.1924	0.0001	0.0001	0.0001	0.0001
Cre08.g361650.v5.5:s:920078-920188	N3	chromosome_8:920188-920891	0.0001	0.0001	0.0001	0.0125	0.0001	0.0105	0.0335	0.0067	0.0294	0.0075	0.0195	0.0037	0.0274	0.0045	0.0638	0.0247	0.0415	0.0187	0.0522	0.0098	0.0279	0.0101	0.0179	0.0561	0.0067	0.024	0.0101
Cre08.g361750.v5.5:s:928648-929304	N3	chromosome_8:928116-928648	0.0001	0.0001	0.0001	0.0095	0.0001	0.0635	0.0096	0.0379	0.1026	0.0158	0.0621	0.0318	0.0606	0.0557	0.0116	0.0351	0.0001	0.1489	0.1063	0.0001	0.0001	0.0001	0.1754	0.0001	0.0001	0.0001	0.0555
Cre08.g361750.v5.5:t:926832-928395	N3	chromosome_8:928116-928648	0.0001	0.0001	0.0001	0.0104	0.0001	0.0544	0.0081	0.0351	0.1189	0.0132	0.0642	0.0367	0.0541	0.0415	0.0114	0.0384	0.0001	0.1586	0.0001	0.0001	0.0732	0.0001	0.1797	0.0001	0.0001	0.0001	0.0001
Cre08.g362050.v5.5:t:1021493-1021534	N7	chromosome_8:1021413-1021493	0.0001	0.0001	0.0209	0.1133	0.0001	0.075	0.0218	0.0157	0.0582	0.0687	0.178	0.0371	0.0713	0.0001	0.0001	0.0001	0.0001	0.0001	0.1656	0.1075	0.0238	0.0691	0.1055	0.1084	0.3029	0.3058	0.0001
Cre08.g362100.v5.5:t:1042793-1042834	N3	chromosome_8:1042715-1042793	0.0001	0.0001	0.0001	0.0784	0.0001	0.0001	0.0001	0.0001	0.0001	0.0001	0.0001	0.0001	0.0001	0.1012	0.0071	0.0198	0.0079	0.0088	0.0468	0.0079	0.0462	0.0173	0.0029	0.0047	0.0262	0.0803	0.1033
Cre08.g362200.v5.5:s:1080533-1082815	N7	chromosome_8:1080303-1080533	0.146	0.0001	0.0001	0.1184	0.0001	0.0001	0.0001	0.0509	0.1389	0.0001	0.1173	0.2823	0.0001	0.0001	0.0001	0.0902	0.0001	0.1686	0.0668	0.0001	0.0001	0.0001	0.1296	0.0001	0.2281	0.3147	0.0001
Cre08.g363450.v5.5:s:1274913-1275356	N3	chromosome_8:1275074-1275357	0.0001	0.0001	0.0001	0.0176	0.0001	0.071	0.014	0.0129	0.0186	0.0105	0.037	0.0346	0.0119	0.0084	0.011	0.0076	0.0001	0.0436	0.0845	0.0964	0.1248	0.0167	0.1126	0.0001	0.0177	0.0091	0.0114
Cre08.g363600.v5.5:t:1283064-1283193	N3	chromosome_8:1282906-1283064	0.0171	0.0001	0.0001	0.1836	0.0001	0.0001	0.0185	0.012	0.0835	0.0891	0.0081	0.0039	0.0097	0.0001	0.0114	0.0064	0.0001	0.0087	0.0117	0.0166	0.0001	0.0001	0.0112	0.0001	0.0001	0.0208	0.0001
Cre08.g363700.v5.5:s:1294324-1294469	N6	chromosome_8:1294469-1295064	0.0001	0.0001	0.3161	0.3276	0.2112	0.2659	0.3042	0.2785	0.2737	0.2787	0.3118	0.247	0.2744	0.2708	0.2873	0.2474	0.2519	0.2728	0.2184	0.1726	0.2015	0.1368	0.2102	0.1658	0.2279	0.188	0.2877
Cre08.g363700.v5.5:t:1295064-1295322	N6	chromosome_8:1294469-1295064	0.0001	0.0001	0.2445	0.2908	0.2182	0.2538	0.2728	0.2278	0.2423	0.2668	0.2464	0.2365	0.2343	0.2533	0.2814	0.2394	0.2323	0.2153	0.194	0.1679	0.1759	0.1118	0.1803	0.1269	0.1779	0.1723	0.2004
Cre08.g363874.v5.5:t:1326094-1326344	N2	chromosome_8:1325706-1326094	0.0001	0.0001	0.0001	0.0001	0.0001	0.0001	0.0001	0.0001	0.0001	0.0001	0.3448	0.3998	0.464	0.2404	0.1706	0.2856	0.0001	0.2376	0.1296	0.0001	0.144	0.0001	0.0001	0.0001	0.0001	0.2244	0.0001
Cre08.g364000.v5.5:s:1356339-1356716	N3	chromosome_8:1356198-1356339	0.0078	0.0001	0.0161	0.0065	0.0197	0.0104	0.0089	0.0098	0.0098	0.008	0.0072	0.0803	0.0091	0.0327	0.009	0.0043	0.0107	0.0044	0.022	0.0079	0.0055	0.0065	0.004	0.0059	0.0062	0.0038	0.0063
Cre08.g364000.v5.5:t:1366116-1366253	N7	chromosome_8:1366253-1367293	0.0678	0.0001	0.0763	0.0279	0.0587	0.0728	0.0411	0.1003	0.1311	0.102	0.0848	0.0873	0.0592	0.0853	0.0886	0.1178	0.1072	0.1799	0.1078	0.1877	0.1612	0.1454	0.2331	0.1869	0.1988	0.2955	0.2876
Cre08.g364400.v5.5:s:1434721-1434951	N2	chromosome_8:1433401-1434862	0.0615	0.0001	0.0001	0.0685	0.0296	0.0134	0.1085	0.0539	0.0117	0.1569	0.087	0.0623	0.0241	0.2281	0.1239	0.1792	0.132	0.126	0.1192	0.0946	0.0701	0.1076	0.1038	0.1019	0.0545	0.0712	0.0468
Cre08.g364501.v5.5:t:1448038-1448110	N2	chromosome_8:1447864-1448038	0.1165	0.0001	0.0001	0.0798	0.0001	0.0179	0.1403	0.1905	0.0833	0.1524	0.18	0.1585	0.1389	0.1344	0.0001	0.1167	0.0001	0.1538	0.0001	0.0001	0.125	0.0725	0.1137	0.0534	0.1538	0.2232	0.0001
Cre08.g364700.v5.5:t:1477966-1478311	N2	chromosome_8:1477888-1478122	0.1223	0.1886	0.1466	0.1352	0.1526	0.165	0.1733	0.1081	0.1436	0.2142	0.1013	0.1386	0.1747	0.103	0.1161	0.1154	0.0932	0.1029	0.1461	0.1117	0.0667	0.0624	0.0997	0.1536	0.0731	0.1251	0.1614
Cre08.g364751.v5.5:t:1495602-1496915	N7	chromosome_8:1495515-1495602	0.0001	0.0001	0.0001	0.1597	0.0001	0.0001	0.0001	0.1201	0.0001	0.0001	0.0001	0.1165	0.0001	0.0001	0.0001	0.0001	0.0001	0.0001	0.0001	0.0001	0.0001	0.0001	0.0001	0.0001	0.0001	0.4822	0.5952
Cre08.g365600.v5.5:s:1653199-1653226	N3	chromosome_8:1652874-1653199	0.0057	0.0195	0.0098	0.0039	0.0206	0.0097	0.0371	0.0116	0.0179	0.0131	0.0106	0.0982	0.0119	0.0162	0.0122	0.0088	0.0179	0.0145	0.0105	0.0173	0.0107	0.0142	0.0079	0.0258	0.0099	0.006	0.0187
Cre08.g365720.v5.5:s:1680699-1680812	N7	chromosome_8:1680508-1680699	0.0749	0.0001	0.0001	0.041	0.0001	0.0001	0.0001	0.0839	0.0001	0.0001	0.0001	0.0782	0.0001	0.2053	0.0001	0.1576	0.0001	0.0001	0.3611	0.0001	0.3258	0.1254	0.284	0.1801	0.1525	0.2669	0.1217
Cre08.g365720.v5.5:t:1680358-1680508	N7	chromosome_8:1680508-1680699	0.0497	0.0001	0.0001	0.0252	0.0001	0.0001	0.0653	0.0519	0.0933	0.0252	0.0001	0.0623	0.0294	0.0001	0.2409	0.0774	0.0001	0.1387	0.2249	0.1084	0.2281	0.0877	0.163	0.1411	0.0907	0.1998	0.0724
Cre08.g366400.v5.5:s:1788463-1788574	N3	chromosome_8:1788564-1789034	0.1184	0.1161	0.1371	0.049	0.1272	0.0719	0.0781	0.0936	0.0576	0.0902	0.0677	0.0709	0.0582	0.0438	0.0087	0.0119	0.0163	0.0083	0.0016	0.0084	0.0083	0.0017	0.001	0.0096	0.017	0.0009	0.016
Cre08.g366400.v5.5:t:1789450-1789530	N3	chromosome_8:1789069-1789450	0.1487	0.1877	0.1741	0.1519	0.1675	0.1007	0.1146	0.1334	0.0859	0.1181	0.0735	0.1256	0.0954	0.077	0.0087	0.0183	0.0169	0.0154	0.0083	0.0024	0.0155	0.0152	0.0053	0.0184	0.0243	0.0012	0.0089
Cre08.g367150.v5.5:t:1901597-1901882	N3	chromosome_8:1901882-1901968	0.0001	0.0001	0.0001	0.0001	0.0001	0.0001	0.0001	0.0001	0.0001	0.1523	0.0001	0.1463	0.0001	0.0556	0.0001	0.0341	0.0001	0.0433	0.0223	0.0168	0.0869	0.0134	0.0076	0.0493	0.0582	0.0001	0.0001
Cre08.g369650.v5.5:t:2188699-2190427	N7	chromosome_8:2188331-2188699	0.0001	0.0001	0.0001	0.0252	0.0001	0.0001	0.0001	0.0001	0.0001	0.0001	0.2585	0.2761	0.0001	0.0001	0.0001	0.16	0.0001	0.0249	0.0001	0.0001	0.1138	0.0208	0.1173	0.2595	0.1462	0.1585	0.0001
Cre08.g370200.v5.5:s:2294807-2295046	N6	chromosome_8:2294617-2294807	0.0001	0.0001	0.0001	0.0001	0.0001	0.0001	0.0001	0.335	0.3329	0.3845	0.4451	0.3781	0.3097	0.5086	0.3949	0.3711	0.2746	0.3029	0.3766	0.2337	0.2303	0.0001	0.3473	0.2804	0.3363	0.2441	0.4986
Cre08.g370200.v5.5:t:2292243-2292431	N3	chromosome_8:2292431-2292644	0.0001	0.0001	0.0001	0.0695	0.0001	0.087	0.0609	0.0315	0.0619	0.0206	0.0436	0.0548	0.0826	0.034	0.0402	0.0598	0.0156	0.0455	0.0023	0.0746	0.0533	0.0552	0.0679	0.0597	0.0774	0.0831	0.0901
Cre08.g370200.v5.5:t:2294208-2294366	N2	chromosome_8:2294366-2294578	0.0001	0.0001	0.0001	0.0001	0.0001	0.0001	0.0983	0.1512	0.0734	0.0899	0.078	0.0856	0.1355	0.0946	0.1363	0.101	0.1127	0.1102	0.0989	0.0771	0.1429	0.1782	0.1165	0.0981	0.0061	0.0626	0.0743
Cre08.g370250.v5.5:s:2295824-2296462	N3	chromosome_8:2295729-2295824	0.0113	0.0001	0.0278	0.0192	0.0444	0.0137	0.0174	0.0113	0.0166	0.0132	0.0103	0.06	0.0099	0.0088	0.0085	0.0064	0.0236	0.0088	0.0143	0.0136	0.0085	0.0118	0.0091	0.0071	0.0073	0.0048	0.0135
Cre08.g370401.v5.5:t:2309227-2309601	N2	chromosome_8:2309167-2309341	0.1682	0.0001	0.0001	0.0001	0.0001	0.0001	0.0001	0.0001	0.0001	0.0651	0.1536	0.1593	0.1761	0.2098	0.226	0.2054	0.1727	0.1856	0.1544	0.1655	0.1229	0.074	0.1172	0.1383	0.1514	0.123	0.0001
Cre08.g370401.v5.5:t:2309662-2309733	N4	chromosome_8:2309601-2309662	0.0001	0.0001	0.0001	0.0001	0.0001	0.0001	0.0001	0.0001	0.0001	0.3731	0.3735	0.4055	0.4025	0.4357	0.405	0.4076	0.3636	0.4416	0.4058	0.3975	0.3763	0.4037	0.4133	0.4152	0.3735	0.3445	0.0001
Cre08.g370550.v5.5:t:2325026-2325089	N3	chromosome_8:2325089-2325469	0.0001	0.0001	0.0001	0.0103	0.1967	0.0346	0.0194	0.0426	0.0001	0.0001	0.0001	0.0001	0.0001	0.0001	0.012	0.0049	0.043	0.0052	0.006	0.0191	0.0046	0.004	0.0022	0.0026	0.0026	0.0038	0.0084
Cre08.g371052.v5.5:t:2397814-2397901	N6	chromosome_8:2397325-2397817	0.3098	0.0001	0.0001	0.3406	0.0001	0.3051	0.0001	0.5146	0.3026	0.0001	0.3139	0.329	0.365	0.199	0.2945	0.2785	0.258	0.2872	0.1477	0.3307	0.2932	0.1794	0.1763	0.2469	0.3926	0.203	0.2873
Cre08.g371450.v5.5:t:2432033-2433160	N2	chromosome_8:2431681-2432033	0.2352	0.2107	0.1241	0.1155	0.103	0.1337	0.164	0.1533	0.1583	0.1935	0.1929	0.2079	0.1246	0.1807	0.1883	0.1176	0.0951	0.1081	0.1321	0.1612	0.1426	0.0899	0.1556	0.1455	0.1225	0.2216	0.1258
Cre08.g373100.v5.5:s:2658355-2658546	N3	chromosome_8:2658546-2658821	0.0276	0.0776	0.0439	0.0506	0.0773	0.0507	0.0423	0.0595	0.0001	0.0001	0.0146	0.0099	0.0351	0.0076	0.0428	0.0588	0.0284	0.0372	0.0296	0.0537	0.0018	0.016	0.0224	0.0174	0.0193	0.0284	0.0078
Cre08.g373100.v5.5:t:2658895-2659103	N3	chromosome_8:2658832-2659029	0.065	0.1013	0.0649	0.0957	0.1048	0.0753	0.0584	0.0591	0.0001	0.0001	0.0148	0.0392	0.0491	0.0076	0.0718	0.0904	0.074	0.0641	0.0684	0.1191	0.0378	0.0369	0.0766	0.0641	0.0586	0.0947	0.0549
Cre08.g373200.v5.5:s:2675669-2675723	N3	chromosome_8:2675537-2675669	0.0001	0.0001	0.0001	0.0001	0.0001	0.0001	0.0001	0.0001	0.0001	0.0001	0.0001	0.0001	0.0001	0.0001	0.0001	0.0001	0.0001	0.0001	0.0001	0.0001	0.0001	0.0001	0.3409	0.0001	0.0001	0.0001	0.0001
Cre08.g373300.v5.5:t:2694614-2694730	N3	chromosome_8:2694528-2694614	0.0459	0.0001	0.0248	0.0215	0.0001	0.0262	0.0892	0.0193	0.0338	0.0226	0.0219	0.0105	0.0179	0.0514	0.0216	0.0145	0.0001	0.0373	0.0596	0.0554	0.038	0.011	0.0466	0.0092	0.091	0.0336	0.1202
Cre08.g373349.v5.5:s:2795098-2795366	N4	chromosome_8:2795097-2795201	0.0001	0.0001	0.0001	0.0001	0.0001	0.0001	0.0001	0.0001	0.0001	0.0001	0.0001	0.0001	0.0001	0.0001	0.0001	0.3434	0.0001	0.0001	0.0001	0.0001	0.0001	0.3327	0.345	0.4253	0.4568	0.4265	0.4921
Cre08.g373349.v5.5:s:2795930-2795984	N4	chromosome_8:2795366-2795930	0.0001	0.0001	0.0001	0.5078	0.0001	0.0001	0.0001	0.0001	0.0001	0.0001	0.0001	0.1889	0.0001	0.0001	0.0001	0.0001	0.0001	0.1127	0.3257	0.0001	0.3038	0.3089	0.3875	0.2144	0.3711	0.4479	0.3937
Cre08.g373349.v5.5:s:2796808-2796902	N4	chromosome_8:2796512-2796832	0.0001	0.0001	0.0001	0.537	0.0001	0.0001	0.0001	0.0001	0.0001	0.0001	0.0001	0.3125	0.0001	0.0001	0.0001	0.0001	0.0001	0.1911	0.5119	0.0001	0.0001	0.0001	0.3024	0.3634	0.3904	0.3556	0.1678
Cre08.g373349.v5.5:s:2797758-2797884	N3	chromosome_8:2797472-2797758	0.0001	0.0001	0.0001	0.0001	0.0001	0.0001	0.0001	0.0001	0.0001	0.0001	0.0001	0.0788	0.0001	0.0001	0.0001	0.0001	0.0001	0.0001	0.1042	0.0001	0.0839	0.0001	0.1914	0.0956	0.0105	0.0001	0.0905
Cre08.g373349.v5.5:t:2794664-2794707	N7	chromosome_8:2794707-2794966	0.0001	0.0001	0.0001	0.0001	0.0001	0.0001	0.0001	0.0001	0.0001	0.0001	0.0001	0.0001	0.0001	0.0001	0.0001	0.3211	0.0001	0.0001	0.0001	0.0001	0.0001	0.3086	0.3249	0.4645	0.3915	0.3639	0.4359
Cre08.g373359.v5.5:s:2852034-2852724	N4	chromosome_8:2851966-2852034	0.2201	0.3121	0.1976	0.1564	0.1767	0.1494	0.0751	0.1157	0.0923	0.0387	0.0688	0.096	0.0876	0.0418	0.0712	0.0853	0.0923	0.0772	0.1047	0.1193	0.1793	0.2968	0.2591	0.2165	0.2819	0.2353	0.2298
Cre08.g373500.v5.5:s:3217492-3217559	N3	chromosome_8:3217559-3218837	0.0001	0.0001	0.0001	0.0001	0.0001	0.0001	0.0001	0.263	0.0001	0.0001	0.0951	0.3471	0.0001	0.1935	0.0001	0.0001	0.0001	0.0001	0.0001	0.0001	0.0001	0.0001	0.0001	0.0001	0.0001	0.0001	0.0001
Cre08.g373583.v5.5:s:3227539-3227807	N3	chromosome_8:3226656-3227539	0.0264	0.0281	0.0171	0.0741	0.0332	0.0429	0.0445	0.1121	0.1082	0.0249	0.0145	0.025	0.0207	0.0001	0.0001	0.0172	0.0313	0.0112	0.0259	0.0228	0.0456	0.0141	0.0217	0.0086	0.0355	0.0104	0.0112
Cre08.g373583.v5.5:s:3233003-3233179	N7	chromosome_8:3232752-3233003	0.1075	0.0001	0.1673	0.2544	0.0001	0.0957	0.0759	0.0837	0.1005	0.0001	0.0001	0.1002	0.0001	0.0001	0.0001	0.1164	0.0001	0.1503	0.0394	0.1246	0.1572	0.0194	0.0671	0.0579	0.1528	0.1117	0.0926
Cre08.g373583.v5.5:t:3226544-3226656	N3	chromosome_8:3226656-3227539	0.0493	0.0672	0.0001	0.1113	0.0001	0.0306	0.0789	0.1682	0.1379	0.0184	0.0191	0.0145	0.0167	0.0001	0.0001	0.0001	0.0001	0.0124	0.0001	0.0001	0.0001	0.0159	0.0351	0.0116	0.0474	0.0145	0.016
Cre08.g374100.v5.5:t:3341104-3341279	N6	chromosome_8:3340960-3341104	0.1942	0.2043	0.3412	0.1678	0.1344	0.2597	0.2992	0.1817	0.1269	0.3071	0.3028	0.1359	0.3101	0.1726	0.1886	0.1095	0.1529	0.1704	0.1783	0.2999	0.2339	0.0833	0.1091	0.1236	0.198	0.1552	0.1402
Cre08.g374300.v5.5:s:3385985-3386256	N2	chromosome_8:3385860-3385985	0.1862	0.1969	0.0698	0.1239	0.1154	0.0795	0.0825	0.2011	0.0817	0.1253	0.1599	0.1826	0.1167	0.1493	0.0967	0.093	0.1992	0.1652	0.1648	0.1702	0.0532	0.0867	0.1058	0.0686	0.0834	0.2142	0.148
Cre08.g375084.v5.5:s:3507705-3507826	N5	chromosome_8:3507376-3507705	0.0705	0.142	0.2537	0.2615	0.0001	0.1209	0.1339	0.1066	0.217	0.2587	0.1139	0.196	0.2721	0.6528	0.5071	0.463	0.6368	0.5877	0.6679	0.7953	0.7727	0.642	0.8064	0.753	0.7123	0.6374	0.6395
Cre08.g375084.v5.5:t:3506126-3506269	N7	chromosome_8:3506269-3507262	0.0287	0.0624	0.0142	0.0658	0.0001	0.0388	0.0089	0.0284	0.0067	0.0982	0.0039	0.004	0.0059	0.0001	0.2405	0.1226	0.0001	0.3343	0.014	0.0001	0.0001	0.0001	0.0001	0.1923	0.2363	0.1984	0.0914
Cre08.g375950.v5.5:s:3608061-3608152	N1	chromosome_8:3608152-3608939	0.2564	0.2205	0.5555	0.5048	0.4896	0.5184	0.5856	0.5951	0.5619	0.5137	0.5759	0.4667	0.4959	0.5152	0.4958	0.5033	0.3949	0.4927	0.4724	0.375	0.3627	0.3671	0.3246	0.3022	0.2916	0.3311	0.4417
Cre08.g376100.v5.5:s:3617176-3617286	N3	chromosome_8:3617113-3617176	0.0001	0.0001	0.0455	0.0423	0.0832	0.0292	0.0233	0.0204	0.0196	0.025	0.0384	0.0421	0.0543	0.0549	0.0396	0.0625	0.1025	0.0682	0.0473	0.0182	0.037	0.116	0.0206	0.008	0.0059	0.0765	0.0801
Cre08.g376100.v5.5:t:3617176-3617286	N3	chromosome_8:3617286-3617629	0.0001	0.0001	0.0001	0.0198	0.0057	0.0021	0.0019	0.0049	0.0013	0.0011	0.0009	0.0004	0.0011	0.0075	0.0097	0.0166	0.0374	0.0076	0.0344	0.0301	0.0357	0.094	0.0991	0.0619	0.1214	0.0755	0.0482
Cre08.g376900.v5.5:s:3717519-3717732	N3	chromosome_8:3717441-3717524	0.0001	0.0001	0.0001	0.0001	0.0001	0.0001	0.0001	0.0001	0.0001	0.0001	0.0001	0.0001	0.0001	0.0001	0.0001	0.2259	0.0001	0.1935	0.0834	0.0001	0.0001	0.0001	0.0001	0.0001	0.0001	0.0001	0.0001
Cre08.g377500.v5.5:s:3830287-3830364	N3	chromosome_8:3828718-3830287	0.0001	0.0001	0.0001	0.0001	0.0001	0.0001	0.0001	0.0001	0.0001	0.0001	0.0001	0.0001	0.0001	0.0001	0.0001	0.0001	0.0001	0.0001	0.0001	0.0001	0.0001	0.0001	0.0001	0.0001	0.0001	0.1229	0.0539
Cre08.g377500.v5.5:t:3828027-3828718	N3	chromosome_8:3828718-3830287	0.0001	0.0001	0.0001	0.0001	0.0001	0.0001	0.0001	0.0001	0.0001	0.0001	0.0001	0.0001	0.0001	0.0001	0.0001	0.0001	0.0001	0.0001	0.0001	0.0001	0.0001	0.0001	0.0142	0.0833	0.0108	0.1156	0.054
Cre08.g378050.v5.5:t:3887894-3888820	N3	chromosome_8:3887714-3887894	0.0765	0.0638	0.0377	0.0442	0.0627	0.0325	0.0368	0.0382	0.0561	0.0279	0.0114	0.0222	0.015	0.0188	0.024	0.0341	0.0251	0.0258	0.0226	0.0161	0.0392	0.0497	0.0243	0.0164	0.0132	0.063	0.0514
Cre08.g378250.v5.5:t:3911673-3913417	N2	chromosome_8:3911505-3911673	0.0538	0.0186	0.1552	0.1401	0.0979	0.1046	0.1504	0.1504	0.1785	0.1658	0.0744	0.183	0.0572	0.1312	0.0828	0.0821	0.161	0.0677	0.0613	0.0711	0.0991	0.0711	0.0871	0.0235	0.0672	0.0756	0.049
Cre08.g379100.v5.5:s:4005437-4006221	N3	chromosome_8:4005111-4005437	0.0048	0.0311	0.0173	0.0072	0.0216	0.0102	0.0434	0.0095	0.035	0.009	0.007	0.0678	0.0074	0.0111	0.0122	0.0074	0.0162	0.0086	0.0092	0.0164	0.0076	0.0098	0.0048	0.005	0.0068	0.0037	0.0052
Cre08.g379450.v5.5:s:4064374-4064455	N3	chromosome_8:4064455-4064666	0.0001	0.0001	0.0001	0.013	0.0001	0.018	0.0178	0.0157	0.0884	0.0163	0.0099	0.0566	0.0149	0.0129	0.0276	0.0267	0.024	0.0107	0.0138	0.0185	0.0429	0.0167	0.0765	0.0131	0.0799	0.0093	0.0163
Cre08.g379450.v5.5:t:4064831-4064907	N3	chromosome_8:4064684-4064831	0.0001	0.0001	0.0001	0.013	0.0001	0.018	0.0177	0.0156	0.0884	0.0162	0.0102	0.0555	0.0146	0.0133	0.0275	0.0272	0.0239	0.0106	0.0135	0.0186	0.0426	0.0166	0.0964	0.0129	0.0808	0.0092	0.0158
Cre08.g380452.v5.5:t:4213540-4213614	N3	chromosome_8:4213197-4213540	0.0001	0.0001	0.0001	0.0001	0.0001	0.0001	0.0001	0.0001	0.0001	0.0113	0.0905	0.0189	0.0418	0.0351	0.0527	0.004	0.0104	0.0066	0.007	0.088	0.0326	0.0781	0.0599	0.1786	0.0585	0.0757	0.0001
Cre08.g380700.v5.5:t:4243554-4243689	N7	chromosome_8:4243453-4243554	0.0001	0.0001	0.0001	0.0001	0.0001	0.0001	0.0001	0.0001	0.1278	0.0995	0.0881	0.0914	0.1437	0.1587	0.1867	0.1234	0.0875	0.1253	0.1183	0.1725	0.0816	0.174	0.0519	0.1983	0.1463	0.1369	0.152
Cre08.g380763.v5.5:t:4248047-4248551	N7	chromosome_8:4247944-4248047	0.0001	0.0001	0.0001	0.0693	0.0001	0.0001	0.0001	0.1756	0.1983	0.0741	0.0001	0.1238	0.0001	0.1926	0.1077	0.1563	0.123	0.1258	0.1337	0.0001	0.1174	0.0001	0.1883	0.3857	0.145	0.1503	0.0001
Cre08.g380763.v5.5:t:4248815-4250801	N7	chromosome_8:4248551-4248821	0.0001	0.0001	0.0001	0.0797	0.0001	0.0153	0.0001	0.0156	0.0731	0.0001	0.0001	0.0436	0.1064	0.0571	0.1458	0.0817	0.1727	0.0926	0.0498	0.0123	0.1321	0.1727	0.0903	0.1344	0.0952	0.1406	0.0781
Cre08.g380800.v5.5:t:4251460-4251596	N3	chromosome_8:4251359-4251460	0.0001	0.0001	0.0001	0.0001	0.0001	0.0001	0.0001	0.0001	0.0001	0.0001	0.0001	0.0602	0.0001	0.0001	0.0518	0.0507	0.054	0.0279	0.0772	0.0484	0.0248	0.0001	0.0111	0.0556	0.06	0.064	0.021
Cre08.g380800.v5.5:t:4251881-4252167	N3	chromosome_8:4251596-4251881	0.0001	0.0001	0.0001	0.0001	0.0001	0.0001	0.0001	0.0001	0.0001	0.0001	0.0001	0.0216	0.0001	0.0001	0.1144	0.0488	0.0723	0.0344	0.1259	0.0209	0.0278	0.0949	0.1132	0.1047	0.0001	0.0112	0.0226
Cre08.g381050.v5.5:s:4276980-4277115	N3	chromosome_8:4276805-4276980	0.2393	0.0997	0.0473	0.033	0.0078	0.0271	0.0184	0.0197	0.0584	0.0267	0.0001	0.075	0.0001	0.0001	0.0001	0.0147	0.0001	0.0106	0.0165	0.0172	0.011	0.0119	0.0232	0.0209	0.0193	0.013	0.0148
Cre08.g381050.v5.5:s:4277359-4277644	N7	chromosome_8:4277115-4277379	0.0776	0.0183	0.0737	0.1142	0.0528	0.1188	0.082	0.0521	0.0089	0.0153	0.0001	0.0648	0.1167	0.0001	0.0001	0.0146	0.0001	0.009	0.0813	0.1116	0.0403	0.0371	0.2157	0.196	0.0001	0.2932	0.1746
Cre08.g381050.v5.5:s:4281615-4281819	N3	chromosome_8:4281514-4281615	0.0001	0.0392	0.0422	0.0778	0.0252	0.0109	0.0129	0.0146	0.0193	0.0001	0.0314	0.0257	0.0001	0.0001	0.0001	0.0001	0.0001	0.0001	0.0295	0.0208	0.0249	0.02	0.0117	0.0173	0.0156	0.0124	0.0333
Cre08.g381050.v5.5:t:4280829-4281376	N3	chromosome_8:4281376-4281480	0.0001	0.0254	0.0093	0.0601	0.0167	0.0071	0.0084	0.0362	0.0128	0.0001	0.0209	0.0161	0.0001	0.0001	0.0001	0.0001	0.0001	0.0001	0.0197	0.0139	0.0167	0.0134	0.008	0.0116	0.0104	0.0083	0.0223
Cre08.g381450.v5.5:s:4326078-4326249	N3	chromosome_8:4325889-4326078	0.0001	0.0001	0.0001	0.0001	0.0001	0.0001	0.0001	0.0001	0.1261	0.1357	0.176	0.2103	0.1735	0.0947	0.0329	0.0536	0.0001	0.0429	0.0512	0.0629	0.0192	0.0001	0.0468	0.0575	0.0001	0.0093	0.0001
Cre08.g381650.v5.5:s:4349095-4349161	N3	chromosome_8:4348745-4349095	0.039	0.0139	0.0414	0.0054	0.0171	0.0089	0.0106	0.0234	0.0285	0.0532	0.0317	0.0741	0.0143	0.0001	0.0001	0.0133	0.036	0.015	0.0229	0.0645	0.0001	0.0001	0.0896	0.0001	0.0313	0.0001	0.0001
Cre08.g381702.v5.5:s:4359028-4359203	N3	chromosome_8:4359203-4359730	0.0378	0.0141	0.0216	0.0169	0.0274	0.016	0.0079	0.0229	0.0234	0.0078	0.0071	0.0052	0.0346	0.0176	0.0172	0.0157	0.0081	0.0263	0.0134	0.0532	0.0495	0.0272	0.0252	0.0244	0.0313	0.0305	0.0177
Cre08.g381702.v5.5:t:4354737-4354815	N3	chromosome_8:4354319-4354737	0.0158	0.0092	0.0046	0.0366	0.0071	0.0475	0.0057	0.0046	0.0301	0.0295	0.0281	0.0124	0.0281	0.0048	0.0167	0.0197	0.0049	0.0248	0.0336	0.0315	0.0273	0.0138	0.0016	0.0101	0.0946	0.0068	0.0287
Cre08.g381800.v5.5:s:4376176-4376495	N3	chromosome_8:4374914-4376187	0.066	0.0001	0.0124	0.004	0.0128	0.0382	0.006	0.0332	0.0204	0.0043	0.0037	0.0144	0.0215	0.0021	0.0027	0.0059	0.0039	0.0072	0.0028	0.0031	0.0116	0.0037	0.0092	0.0138	0.0028	0.009	0.0048
Cre08.g381800.v5.5:t:4374837-4374914	N3	chromosome_8:4374914-4376187	0.0605	0.1116	0.01	0.0033	0.0087	0.0376	0.005	0.0411	0.0192	0.0039	0.0031	0.0134	0.0198	0.0014	0.0017	0.005	0.0026	0.0059	0.0016	0.0019	0.0107	0.0024	0.0078	0.0112	0.0022	0.008	0.0044
Cre08.g382300.v5.5:t:4452535-4452747	N3	chromosome_8:4452236-4452691	0.0086	0.028	0.0335	0.0286	0.063	0.0309	0.0186	0.0219	0.012	0.0122	0.0075	0.0052	0.0044	0.0125	0.0165	0.0039	0.0134	0.0045	0.0078	0.0025	0.0027	0.003	0.0063	0.0032	0.0128	0.0157	0.0034
Cre08.g382575.v5.5:t:4503369-4503421	N3	chromosome_8:4502609-4503369	0.1258	0.0001	0.0686	0.0137	0.025	0.0086	0.0168	0.097	0.0279	0.0263	0.0001	0.2506	0.0195	0.0001	0.0001	0.0205	0.0001	0.0001	0.0884	0.0001	0.0001	0.0001	0.0451	0.0001	0.0001	0.0001	0.0001
Cre08.g382590.v5.5:t:4507313-4507387	N3	chromosome_8:4507387-4507590	0.0032	0.0071	0.0073	0.0027	0.0073	0.0051	0.0074	0.0031	0.005	0.0058	0.0175	0.0306	0.016	0.0769	0.0172	0.0252	0.0418	0.0121	0.0038	0.0052	0.0148	0.0034	0.0017	0.0027	0.003	0.0016	0.0029
Cre08.g382716.v5.5:s:4542205-4542388	N3	chromosome_8:4542388-4545182	0.0001	0.0001	0.0001	0.0001	0.0001	0.0001	0.0001	0.0001	0.0001	0.0579	0.0099	0.0623	0.0602	0.0474	0.0225	0.0055	0.0598	0.0099	0.0312	0.0128	0.0216	0.026	0.0001	0.0001	0.0001	0.1082	0.0001
Cre08.g383000.v5.5:t:4570745-4573802	N3	chromosome_8:4570531-4570745	0.0001	0.0001	0.0001	0.0001	0.0001	0.0001	0.0001	0.0001	0.0001	0.0001	0.0001	0.3952	0.0001	0.0001	0.0001	0.0001	0.0001	0.0001	0.0001	0.0001	0.0001	0.0001	0.0001	0.0001	0.0001	0.0001	0.0001
Cre08.g383400.v5.5:t:4619609-4620046	N4	chromosome_8:4620043-4620206	0.1766	0.1614	0.2176	0.2535	0.0001	0.1061	0.0001	0.0001	0.0001	0.0001	0.0001	0.3754	0.0001	0.0001	0.0001	0.1447	0.1056	0.1053	0.2361	0.2222	0.2417	0.1434	0.1912	0.1726	0.2374	0.1676	0.194
Cre08.g383850.v5.5:t:4694122-4694762	N6	chromosome_8:4693476-4694146	0.2354	0.3048	0.2224	0.2533	0.2284	0.2095	0.1807	0.329	0.2042	0.2978	0.3365	0.254	0.2443	0.2875	0.3677	0.4205	0.1896	0.2485	0.2788	0.2175	0.3614	0.4131	0.3955	0.4853	0.4431	0.5252	0.1828
Cre08.g384320.v5.5:t:4792694-4792890	N3	chromosome_8:4791232-4792728	0.3026	0.0001	0.0001	0.0001	0.0001	0.0001	0.0001	0.0001	0.0001	0.0001	0.0001	0.0001	0.0001	0.0001	0.0001	0.0001	0.0001	0.0001	0.0001	0.0001	0.0001	0.0001	0.0001	0.0001	0.0001	0.3729	0.0001
Cre08.g384320.v5.5:t:4793039-4793470	N7	chromosome_8:4792890-4793039	0.1209	0.0001	0.0001	0.0001	0.0001	0.0001	0.0001	0.0001	0.0001	0.0001	0.0001	0.3168	0.0001	0.0001	0.0001	0.0001	0.0001	0.0001	0.0001	0.0001	0.0001	0.0001	0.0001	0.0001	0.4273	0.4857	0.0001
Cre08.g385300.v5.5:s:4935872-4935986	N7	chromosome_8:4935727-4935872	0.0383	0.0001	0.0001	0.0578	0.0001	0.0001	0.0001	0.0001	0.0001	0.0001	0.0001	0.0209	0.071	0.0201	0.1509	0.1252	0.0581	0.0663	0.0368	0.0975	0.0136	0.1131	0.1554	0.0543	0.0768	0.1106	0.1011
Cre08.g385500.v5.5:t:4953040-4953193	N3	chromosome_8:4953122-4953647	0.0117	0.0001	0.0042	0.0083	0.0959	0.0036	0.0051	0.0206	0.0071	0.0081	0.0371	0.0052	0.006	0.0016	0.0013	0.0084	0.024	0.0046	0.001	0.0108	0.0051	0.0128	0.0045	0.0095	0.0035	0.0051	0.0049
Cre08.g385600.v5.5:s:4960066-4960127	N4	chromosome_8:4960127-4960374	0.0001	0.0001	0.0001	0.0666	0.0001	0.1658	0.0001	0.0001	0.0833	0.0001	0.0965	0.1921	0.1852	0.1577	0.1892	0.296	0.1638	0.2268	0.2688	0.0682	0.29	0.2368	0.3107	0.3048	0.3531	0.2865	0.1969
Cre08.g385600.v5.5:t:4961039-4961453	N4	chromosome_8:4960776-4961039	0.0001	0.0001	0.0001	0.0583	0.0001	0.1146	0.0001	0.0001	0.2068	0.0001	0.1228	0.096	0.2145	0.3091	0.2226	0.2428	0.2588	0.1519	0.1056	0.2013	0.332	0.2039	0.239	0.1932	0.3637	0.2696	0.1916
Cre08.g385700.v5.5:s:4972174-4972830	N4	chromosome_8:4972830-4973381	0.1046	0.0136	0.0709	0.0733	0.138	0.1367	0.1257	0.1477	0.1726	0.1993	0.2342	0.2211	0.117	0.2717	0.2095	0.1803	0.1919	0.2014	0.1959	0.1707	0.2133	0.1509	0.1965	0.1592	0.2175	0.3428	0.2216
Cre08.g385700.v5.5:s:4973946-4974144	N6	chromosome_8:4974144-4974510	0.0563	0.0001	0.0987	0.1546	0.0682	0.1597	0.174	0.3201	0.3609	0.3952	0.3163	0.31	0.1324	0.2569	0.3268	0.3636	0.2777	0.2674	0.3373	0.2967	0.2959	0.2794	0.2995	0.3065	0.2122	0.2828	0.2103
Cre08.g385700.v5.5:t:4973381-4973483	N4	chromosome_8:4972830-4973381	0.1174	0.0075	0.0725	0.049	0.1133	0.1076	0.0969	0.118	0.1468	0.2098	0.1922	0.2564	0.0994	0.2303	0.1898	0.1496	0.1811	0.1391	0.1945	0.1664	0.1619	0.1359	0.15	0.1454	0.1856	0.3402	0.1889
Cre08.g385700.v5.5:t:4973946-4974144	N3	chromosome_8:4973483-4973946	0.055	0.0102	0.0192	0.0253	0.0053	0.046	0.0033	0.0171	0.003	0.0173	0.0502	0.0185	0.0298	0.0312	0.0245	0.018	0.0318	0.0256	0.0122	0.0167	0.01	0.0134	0.0125	0.0179	0.0234	0.0209	0.0106
Cre08.g385800.v5.5:t:4983417-4983937	N3	chromosome_8:4983776-4984110	0.002	0.0047	0.0057	0.0875	0.006	0.0025	0.0047	0.0714	0.0064	0.0064	0.004	0.1481	0.005	0.038	0.0051	0.0036	0.0001	0.0057	0.0062	0.0049	0.0369	0.0057	0.0451	0.0039	0.0863	0.0027	0.0625
Cre08.g385850.v5.5:t:4986078-4986246	N3	chromosome_8:4986246-4986999	0.0267	0.0431	0.0105	0.0649	0.0124	0.0075	0.0283	0.0314	0.0634	0.027	0.0277	0.0096	0.0049	0.0352	0.0257	0.0274	0.0117	0.0059	0.0081	0.0091	0.0349	0.0209	0.0283	0.0261	0.0306	0.0394	0.0303
Cre08.g386000.v5.5:t:5009073-5009150	N2	chromosome_8:5008912-5009076	0.0001	0.0001	0.0001	0.0001	0.0001	0.0001	0.0001	0.2068	0.1231	0.1783	0.2435	0.1629	0.1597	0.3012	0.1371	0.4243	0.0001	0.4159	0.248	0.0001	0.0001	0.0001	0.1626	0.2491	0.2015	0.249	0.0001
Cre08.g386100.v5.5:s:5018929-5018960	N3	chromosome_8:5018742-5018929	0.0001	0.0001	0.0001	0.0115	0.0001	0.0001	0.0938	0.0001	0.0782	0.0001	0.0001	0.0691	0.0001	0.1814	0.0001	0.0132	0.0001	0.0001	0.125	0.0001	0.1266	0.0884	0.031	0.0753	0.0643	0.1685	0.0001
Cre08.g386100.v5.5:s:5020592-5020796	N7	chromosome_8:5020396-5020631	0.0167	0.0001	0.0001	0.2901	0.0001	0.1397	0.0001	0.1196	0.0834	0.0888	0.0627	0.0685	0.0001	0.0957	0.2129	0.1925	0.0001	0.0001	0.0292	0.0001	0.2292	0.0808	0.0153	0.0465	0.1137	0.1237	0.1316
Cre08.g386100.v5.5:s:5020908-5020978	N3	chromosome_8:5020796-5020908	0.1498	0.0001	0.0001	0.0809	0.0111	0.0097	0.0096	0.0363	0.0326	0.0485	0.008	0.0034	0.0087	0.0084	0.0063	0.0751	0.0001	0.0077	0.0086	0.05	0.008	0.0001	0.0048	0.0071	0.0083	0.0045	0.0084
Cre08.g386100.v5.5:s:5021101-5021299	N3	chromosome_8:5020978-5021101	0.1142	0.0001	0.0001	0.0464	0.0001	0.166	0.0202	0.0153	0.0582	0.1664	0.2202	0.1032	0.0618	0.1323	0.0207	0.0723	0.0001	0.0539	0.0194	0.0248	0.102	0.0457	0.03	0.0579	0.0628	0.0166	0.0001
Cre09.g386113.v5.5:s:13698-13958	N7	chromosome_9:13562-13698	0.0735	0.0001	0.0001	0.0106	0.0001	0.0001	0.0001	0.0494	0.0586	0.0222	0.0048	0.0469	0.0061	0.037	0.0418	0.0801	0.0001	0.0977	0.0752	0.0601	0.13	0.0952	0.0507	0.2155	0.1756	0.0655	0.0406
Cre09.g386250.v5.5:s:73286-73863	N3	chromosome_9:73738-74219	0.0001	0.0184	0.0057	0.011	0.0072	0.0043	0.0139	0.0023	0.0137	0.0186	0.0139	0.005	0.0124	0.0138	0.0362	0.0287	0.013	0.0863	0.0277	0.0812	0.0172	0.0196	0.0533	0.0001	0.1184	0.0001	0.0001
Cre09.g386250.v5.5:t:74147-74452	N7	chromosome_9:74136-74147	0.0303	0.0118	0.0303	0.0382	0.0598	0.0521	0.0375	0.067	0.0567	0.0786	0.0524	0.0081	0.0247	0.0265	0.1137	0.1009	0.2153	0.1489	0.0696	0.1012	0.1778	0.2529	0.0684	0.1045	0.0603	0.1837	0.0001
Cre09.g386550.v5.5:s:103413-103611	N3	chromosome_9:103295-103413	0.0382	0.067	0.0501	0.1091	0.0728	0.0167	0.0522	0.068	0.0423	0.0337	0.0417	0.065	0.045	0.0924	0.1048	0.0918	0.0968	0.0621	0.0186	0.0001	0.0226	0.0716	0.0527	0.1037	0.0219	0.1099	0.0001
Cre09.g386600.v5.5:s:113862-114215	N3	chromosome_9:113668-113862	0.046	0.0001	0.0001	0.052	0.0001	0.0104	0.0114	0.0308	0.0724	0.0133	0.0707	0.0993	0.0111	0.0001	0.0127	0.0045	0.0107	0.0074	0.0066	0.0068	0.009	0.0062	0.0039	0.0062	0.0277	0.0162	0.0068
Cre09.g386600.v5.5:s:114822-115105	N7	chromosome_9:114722-114822	0.0001	0.0001	0.0001	0.3131	0.0001	0.0001	0.0001	0.2868	0.0001	0.0001	0.0001	0.254	0.0001	0.0001	0.0001	0.083	0.0001	0.067	0.0796	0.0001	0.0001	0.0632	0.2475	0.108	0.2251	0.116	0.1924
Cre09.g386700.v5.5:s:125683-126093	N7	chromosome_9:125554-125683	0.0139	0.0132	0.0592	0.0292	0.012	0.0409	0.022	0.0494	0.0144	0.0639	0.0461	0.0386	0.0697	0.0938	0.0754	0.0747	0.1832	0.0675	0.089	0.1371	0.2411	0.1375	0.0966	0.3395	0.1465	0.1453	0.0715
Cre09.g386850.v5.5:t:3096844-3096882	N4	chromosome_9:3096641-3096844	0.0001	0.0001	0.0001	0.0001	0.0001	0.0001	0.0001	0.0001	0.3426	0.4399	0.4464	0.3548	0.3112	0.3267	0.3042	0.3165	0.3494	0.2798	0.3273	0.2591	0.4813	0.2773	0.3496	0.5169	0.4963	0.4674	0.0001
Cre09.g387050.v5.5:t:3080765-3080879	N3	chromosome_9:3080572-3080765	0.0341	0.0882	0.0872	0.0505	0.0001	0.0661	0.0316	0.056	0.0675	0.0342	0.0097	0.0387	0.0486	0.0382	0.0205	0.0542	0.0571	0.0168	0.0212	0.0346	0.0738	0.0291	0.0284	0.1177	0.0282	0.0432	0.044
Cre09.g387134.v5.5:t:3162187-3162351	N3	chromosome_9:3162351-3162663	0.0001	0.0001	0.0001	0.0246	0.0313	0.0313	0.0208	0.0127	0.0153	0.0145	0.0114	0.0628	0.0113	0.0139	0.0108	0.0244	0.0217	0.0084	0.0142	0.0228	0.0162	0.0001	0.0149	0.023	0.0212	0.015	0.0001
Cre09.g387578.v5.5:t:3212807-3212915	N3	chromosome_9:3212553-3212807	0.0001	0.0001	0.0001	0.0001	0.0001	0.0001	0.0001	0.0001	0.0001	0.0417	0.0185	0.1249	0.0172	0.0087	0.0148	0.0098	0.0192	0.0101	0.017	0.0355	0.0001	0.0001	0.0001	0.0001	0.0001	0.0001	0.0001
Cre09.g387600.v5.5:t:2983241-2983358	N3	chromosome_9:2983158-2983250	0.0001	0.0001	0.0001	0.0001	0.0001	0.0001	0.0001	0.0001	0.0001	0.0512	0.0634	0.0494	0.0887	0.0636	0.1037	0.1004	0.1533	0.0636	0.0998	0.1168	0.157	0.0001	0.0001	0.0001	0.0001	0.0001	0.0001
Cre09.g387689.v5.5:t:3228726-3229124	N7	chromosome_9:3228480-3228729	0.0001	0.0001	0.0001	0.0909	0.0001	0.0001	0.0001	0.0001	0.0001	0.0754	0.0654	0.0763	0.1039	0.0125	0.1239	0.1124	0.0001	0.0596	0.0489	0.1091	0.0708	0.0535	0.0898	0.0465	0.0945	0.216	0.141
Cre09.g387750.v5.5:t:2973937-2975015	N7	chromosome_9:2973793-2973943	0.0001	0.0001	0.0001	0.0001	0.0001	0.0001	0.0001	0.0001	0.0001	0.0001	0.1736	0.1192	0.0001	0.1495	0.2922	0.1476	0.0001	0.2564	0.1887	0.0303	0.159	0.0001	0.1152	0.1939	0.0115	0.1848	0.0001
Cre09.g387763.v5.5:s:3241660-3241874	N3	chromosome_9:3241874-3241949	0.0001	0.0001	0.0001	0.1063	0.0001	0.0115	0.071	0.0605	0.0135	0.0139	0.0822	0.0429	0.0139	0.0493	0.0077	0.0305	0.0606	0.0127	0.0097	0.0098	0.0084	0.0074	0.0046	0.0087	0.0505	0.014	0.012
Cre09.g387875.v5.5:t:3254245-3254518	N3	chromosome_9:3254117-3254245	0.0959	0.0842	0.0923	0.0939	0.0809	0.0644	0.0856	0.1028	0.0995	0.0465	0.0709	0.1035	0.0716	0.0515	0.0369	0.0173	0.0857	0.0852	0.0693	0.0251	0.0283	0.0234	0.0445	0.0459	0.0499	0.0409	0.0392
Cre09.g388150.v5.5:t:2913975-2914062	N3	chromosome_9:2913683-2913975	0.0312	0.021	0.0571	0.0466	0.0194	0.0324	0.0364	0.0167	0.0415	0.0495	0.0398	0.0205	0.0347	0.1597	0.0327	0.0759	0.0866	0.243	0.0329	0.0374	0.0113	0.0143	0.041	0.0549	0.1276	0.0279	0.013
Cre09.g388615.v5.5:s:3353916-3354031	N3	chromosome_9:3354031-3354288	0.0763	0.0715	0.0486	0.063	0.0416	0.0115	0.0076	0.0281	0.0386	0.0247	0.1033	0.0132	0.0563	0.0444	0.0145	0.0036	0.0375	0.038	0.0097	0.0109	0.0115	0.0294	0.0284	0.0371	0.0508	0.0574	0.0481
Cre09.g388689.v5.5:s:3361705-3361780	N3	chromosome_9:3361615-3361705	0.0123	0.0001	0.1187	0.0801	0.0001	0.0266	0.0001	0.0139	0.072	0.0156	0.0157	0.0073	0.0226	0.0484	0.0326	0.0457	0.0832	0.0737	0.0516	0.0442	0.01	0.0319	0.0164	0.0501	0.0835	0.0376	0.0063
Cre09.g388726.v5.5:s:3368221-3368391	N6	chromosome_9:3368391-3368478	0.3327	0.2841	0.292	0.3322	0.2667	0.217	0.2337	0.2205	0.1953	0.215	0.188	0.3002	0.2874	0.3058	0.2894	0.3193	0.3106	0.2453	0.3023	0.3204	0.3421	0.2952	0.3398	0.3061	0.3205	0.3376	0.2233
Cre09.g388726.v5.5:t:3368564-3369750	N1	chromosome_9:3368534-3368656	0.5086	0.4229	0.4425	0.442	0.3127	0.2926	0.3057	0.2953	0.3216	0.2958	0.2609	0.3907	0.3573	0.3542	0.3383	0.3436	0.3864	0.3466	0.3669	0.3902	0.4115	0.4184	0.4214	0.39	0.4138	0.3836	0.4231
Cre09.g388750.v5.5:s:2825701-2825873	N7	chromosome_9:2825460-2825701	0.0542	0.0001	0.0135	0.0048	0.0146	0.0145	0.0242	0.0113	0.0038	0.0289	0.0024	0.0099	0.0129	0.0233	0.0586	0.0488	0.0157	0.0781	0.0775	0.1715	0.1266	0.0539	0.1487	0.0634	0.2095	0.1056	0.0188
Cre09.g388750.v5.5:t:2824963-2825067	N7	chromosome_9:2825067-2825173	0.0261	0.0001	0.04	0.0049	0.0148	0.0141	0.0108	0.0038	0.0398	0.0229	0.0259	0.0216	0.0287	0.0141	0.0266	0.0425	0.0455	0.0757	0.0969	0.1164	0.0938	0.1173	0.1887	0.1862	0.014	0.1041	0.0565
Cre09.g388986.v5.5:t:3405923-3406199	N3	chromosome_9:3405564-3405923	0.0327	0.0001	0.0001	0.0837	0.0001	0.0181	0.0001	0.0331	0.0794	0.0788	0.0536	0.0293	0.0444	0.0387	0.0723	0.0199	0.0385	0.0174	0.0481	0.0001	0.0162	0.0121	0.034	0.0073	0.0222	0.0509	0.0431
Cre09.g389060.v5.5:s:3418646-3418790	N3	chromosome_9:3418790-3419132	0.0153	0.0001	0.0001	0.0187	0.0001	0.0001	0.0001	0.0122	0.0001	0.0306	0.0001	0.0174	0.0001	0.0001	0.0001	0.0139	0.0001	0.2356	0.0256	0.0001	0.0001	0.0278	0.1104	0.0001	0.0185	0.0151	0.0001
Cre09.g389060.v5.5:t:3419126-3419400	N3	chromosome_9:3418790-3419132	0.016	0.0001	0.0001	0.0186	0.0001	0.0001	0.0001	0.0145	0.0001	0.0001	0.0001	0.0195	0.0001	0.0001	0.0001	0.0133	0.0001	0.2167	0.0303	0.0001	0.0001	0.0303	0.1202	0.0001	0.0185	0.0152	0.0001
Cre09.g389550.v5.5:s:2717868-2718214	N2	chromosome_9:2718207-2718408	0.0001	0.0001	0.0001	0.0001	0.0001	0.0001	0.0001	0.0106	0.2421	0.1474	0.1757	0.1859	0.1788	0.2127	0.2091	0.198	0.1631	0.184	0.2842	0.157	0.2284	0.1282	0.1189	0.2637	0.1997	0.0001	0.0001
Cre09.g389652.v5.5:t:3492110-3492270	N2	chromosome_9:3492270-3493027	0.0393	0.12	0.0208	0.0785	0.4006	0.2938	0.3405	0.2145	0.2186	0.0655	0.1281	0.1675	0.1166	0.0278	0.0482	0.1088	0.0001	0.1164	0.0878	0.0515	0.121	0.1675	0.1685	0.1883	0.1585	0.1441	0.1941
Cre09.g389763.v5.5:s:3508800-3508850	N3	chromosome_9:3508609-3508800	0.0556	0.0102	0.051	0.0439	0.067	0.0202	0.0408	0.003	0.0185	0.0342	0.0022	0.0362	0.0502	0.0049	0.0268	0.0171	0.0683	0.007	0.0095	0.0175	0.0152	0.0001	0.0225	0.0104	0.1674	0.0102	0.0143
Cre09.g389875.v5.5:s:3527901-3528032	N3	chromosome_9:3528032-3528569	0.0001	0.0001	0.0001	0.0001	0.0001	0.0001	0.0001	0.0001	0.0001	0.0001	0.0156	0.0886	0.0158	0.0385	0.0279	0.0129	0.0001	0.0279	0.0355	0.0001	0.0001	0.0455	0.0195	0.0277	0.0227	0.0152	0.0001
Cre09.g389875.v5.5:t:3528569-3528716	N3	chromosome_9:3528032-3528569	0.0001	0.0001	0.0001	0.0001	0.0001	0.0001	0.0001	0.0001	0.0001	0.0001	0.0151	0.0913	0.0133	0.0238	0.0212	0.0085	0.0001	0.0169	0.0256	0.0001	0.021	0.0166	0.0138	0.0175	0.0152	0.0117	0.0001
Cre09.g389875.v5.5:t:3530059-3530099	N3	chromosome_9:3529773-3530064	0.0001	0.0001	0.0001	0.0001	0.0001	0.0001	0.0001	0.0001	0.0001	0.0001	0.1969	0.0272	0.0228	0.0167	0.0191	0.0192	0.0333	0.0001	0.0279	0.0001	0.0001	0.0001	0.0193	0.0253	0.0293	0.0206	0.0001
Cre09.g390097.v5.5:s:3578129-3578682	N7	chromosome_9:3577961-3578197	0.0795	0.0001	0.0001	0.0001	0.0001	0.0001	0.0001	0.1896	0.0001	0.0543	0.0168	0.1132	0.0001	0.057	0.0001	0.2735	0.0001	0.1255	0.0001	0.0001	0.1288	0.1259	0.1092	0.1713	0.0642	0.0835	0.1272
Cre09.g390467.v5.5:t:3650543-3650629	N3	chromosome_9:3650629-3651281	0.0072	0.0001	0.0001	0.0001	0.0001	0.0001	0.0001	0.067	0.0001	0.0001	0.0001	0.0001	0.0664	0.1326	0.0854	0.0189	0.0481	0.0037	0.0645	0.0238	0.0421	0.0815	0.0489	0.0189	0.0379	0.0392	0.0038
Cre09.g390850.v5.5:t:2542160-2542362	N3	chromosome_9:2541600-2542282	0.0222	0.0001	0.0001	0.0101	0.0001	0.0144	0.0132	0.0082	0.0116	0.0339	0.0069	0.0519	0.0241	0.009	0.0001	0.0084	0.0176	0.0078	0.015	0.0001	0.0705	0.0001	0.0104	0.0146	0.0174	0.0114	0.0124
Cre09.g390957.v5.5:t:2524361-2524498	N3	chromosome_9:2523920-2524365	0.0001	0.0001	0.0001	0.0001	0.0001	0.0001	0.0001	0.0001	0.0001	0.0001	0.0001	0.1081	0.0001	0.0001	0.0355	0.0793	0.0001	0.0311	0.0001	0.0001	0.0887	0.0265	0.0135	0.025	0.0653	0.0747	0.0263
Cre09.g391319.v5.5:t:3754742-3754804	N3	chromosome_9:3754379-3754784	0.0237	0.0001	0.0001	0.2522	0.0001	0.0001	0.0001	0.0001	0.0001	0.0001	0.0001	0.0252	0.0001	0.0001	0.0001	0.0001	0.0001	0.0227	0.0313	0.0001	0.0257	0.0179	0.0148	0.0228	0.0217	0.0157	0.0201
Cre09.g391700.v5.5:t:2397241-2398029	N3	chromosome_9:2397142-2397241	0.0001	0.0001	0.0001	0.0001	0.0001	0.0001	0.0001	0.0001	0.0085	0.0675	0.0535	0.106	0.0001	0.0544	0.015	0.0098	0.0001	0.0001	0.0239	0.102	0.0175	0.0001	0.054	0.0728	0.0132	0.0595	0.0001
Cre09.g391726.v5.5:t:3821656-3821711	N3	chromosome_9:3821711-3822095	0.0001	0.0001	0.0001	0.0001	0.0001	0.0001	0.0001	0.0001	0.0001	0.0001	0.0001	0.0704	0.0758	0.0583	0.0341	0.0189	0.0093	0.015	0.0114	0.0065	0.0037	0.001	0.0078	0.0029	0.0103	0.0068	0.0024
Cre09.g392000.v5.5:s:2367697-2367800	N5	chromosome_9:2367800-2368770	0.0001	0.0001	0.0001	0.5285	0.0001	0.0001	0.0001	0.0001	0.709	0.0001	0.3856	0.4517	0.5471	0.4368	0.2931	0.5045	0.497	0.4758	0.4943	0.0001	0.422	0.5022	0.5144	0.4471	0.4324	0.56	0.4374
Cre09.g392000.v5.5:t:2365870-2366062	N7	chromosome_9:2365651-2365870	0.0001	0.0001	0.0001	0.2356	0.0001	0.0001	0.0001	0.0001	0.0001	0.0001	0.0001	0.1646	0.0001	0.0794	0.1565	0.3095	0.0001	0.1723	0.2206	0.0249	0.1667	0.0001	0.1974	0.0001	0.1743	0.1837	0.12
Cre09.g392000.v5.5:t:2369172-2369267	N4	chromosome_9:2368367-2369172	0.0001	0.0001	0.0001	0.2998	0.0001	0.0001	0.22	0.2206	0.0001	0.0001	0.2551	0.2034	0.2559	0.1553	0.2891	0.2232	0.1725	0.1858	0.2659	0.1991	0.2441	0.1796	0.3459	0.2396	0.2446	0.2101	0.3224
Cre09.g392060.v5.5:t:3879058-3879368	N2	chromosome_9:3878767-3879119	0.0001	0.0001	0.0001	0.2252	0.0001	0.2051	0.2234	0.2853	0.1521	0.1344	0.1412	0.2204	0.2898	0.0496	0.0001	0.3525	0.0001	0.3243	0.0001	0.0001	0.0001	0.0001	0.2784	0.1683	0.0893	0.1848	0.0001
Cre09.g392350.v5.5:t:2295674-2297009	N2	chromosome_9:2296984-2297164	0.0292	0.0515	0.0168	0.0603	0.0437	0.0604	0.1188	0.087	0.109	0.0949	0.0966	0.0871	0.115	0.1078	0.0886	0.0814	0.0469	0.1035	0.0635	0.0465	0.0524	0.0469	0.0634	0.0627	0.0571	0.0499	0.0017
Cre09.g392655.v5.5:t:3969848-3970176	N3	chromosome_9:3969674-3969848	0.0118	0.0159	0.0088	0.0041	0.0724	0.0214	0.0071	0.0624	0.0321	0.0349	0.0041	0.0135	0.0333	0.053	0.026	0.0031	0.0651	0.0165	0.0237	0.0075	0.0066	0.0049	0.0224	0.023	0.0191	0.0039	0.0068
Cre09.g392655.v5.5:t:3971212-3971364	N3	chromosome_9:3971063-3971212	0.0168	0.0684	0.0253	0.0138	0.0554	0.0574	0.0063	0.0048	0.0295	0.0307	0.0162	0.0021	0.0305	0.041	0.0281	0.0145	0.0199	0.0112	0.0153	0.0295	0.0047	0.0056	0.0244	0.0319	0.0063	0.0187	0.0064
Cre09.g392655.v5.5:t:3971562-3971755	N3	chromosome_9:3971364-3971562	0.0586	0.0187	0.0103	0.0063	0.0174	0.0516	0.0333	0.0761	0.0097	0.0069	0.0202	0.0344	0.0315	0.0315	0.0177	0.0265	0.0076	0.0692	0.0054	0.006	0.0216	0.0073	0.0174	0.0049	0.0337	0.0042	0.0096
Cre09.g392766.v5.5:t:3990472-3990671	N3	chromosome_9:3990655-3990808	0.0063	0.0001	0.0001	0.0255	0.0001	0.0263	0.0345	0.0268	0.037	0.0431	0.0776	0.0983	0.0579	0.0001	0.0001	0.047	0.0001	0.0291	0.0001	0.0571	0.0001	0.0096	0.0055	0.0112	0.1143	0.031	0.0001
Cre09.g392850.v5.5:s:2227461-2227709	N2	chromosome_9:2227252-2227479	0.0001	0.0001	0.0001	0.0001	0.0001	0.0001	0.0001	0.0001	0.0001	0.0001	0.0001	0.528	0.2694	0.2385	0.0001	0.4438	0.0001	0.3851	0.3947	0.0001	0.0001	0.0001	0.0001	0.0001	0.0001	0.0001	0.0001
Cre09.g393050.v5.5:s:2199899-2200090	N3	chromosome_9:2199152-2199899	0.0274	0.0293	0.022	0.0121	0.0281	0.0282	0.0251	0.0001	0.036	0.0001	0.0001	0.0095	0.0238	0.0001	0.0001	0.0187	0.0001	0.024	0.0262	0.0266	0.0192	0.0536	0.0391	0.0343	0.0153	0.0823	0.023
Cre09.g393050.v5.5:t:2199084-2199152	N3	chromosome_9:2199152-2199899	0.0227	0.021	0.0148	0.0096	0.0216	0.0264	0.0187	0.0218	0.0258	0.0001	0.0184	0.0078	0.0237	0.0001	0.0187	0.0118	0.0001	0.0207	0.0138	0.018	0.0144	0.0336	0.0294	0.0276	0.0113	0.0616	0.0146
Cre09.g393150.v5.5:t:2181508-2181661	N3	chromosome_9:2181369-2181508	0.0391	0.0572	0.0482	0.0287	0.0628	0.0303	0.0482	0.03	0.0531	0.0168	0.0535	0.0231	0.0417	0.0572	0.0549	0.036	0.0455	0.0473	0.0289	0.0549	0.0177	0.0044	0.0112	0.0514	0.0147	0.0186	0.0478
Cre09.g393250.v5.5:s:2161083-2161341	N3	chromosome_9:2160801-2161083	0.1246	0.0001	0.0001	0.0657	0.0839	0.0372	0.1391	0.0233	0.0871	0.1682	0.1533	0.1209	0.1065	0.0314	0.0001	0.0001	0.0001	0.0298	0.0001	0.0001	0.0001	0.125	0.0264	0.0001	0.0417	0.0001	0.0001
Cre09.g393802.v5.5:t:4135085-4135208	N3	chromosome_9:4135027-4135085	0.0001	0.0001	0.0001	0.0001	0.0001	0.0001	0.0001	0.0001	0.0001	0.0001	0.0001	0.0001	0.0001	0.0653	0.023	0.0927	0.0001	0.0229	0.0444	0.0162	0.0525	0.0421	0.0404	0.022	0.0676	0.0103	0.0401
Cre09.g393900.v5.5:s:2086018-2086203	N5	chromosome_9:2086203-2086488	0.4209	0.1783	0.2008	0.2262	0.1893	0.1315	0.1591	0.1028	0.0001	0.0001	0.1345	0.1764	0.2186	0.1416	0.4513	0.3852	0.6011	0.5774	0.4635	0.4451	0.6373	0.5831	0.5803	0.7508	0.74	0.6831	0.6962
Cre09.g393900.v5.5:t:2087093-2088201	N5	chromosome_9:2086816-2087093	0.3888	0.2015	0.2025	0.2212	0.1661	0.1766	0.1971	0.0924	0.0001	0.0001	0.1794	0.1517	0.2695	0.2192	0.3448	0.3156	0.0001	0.4665	0.5009	0.3823	0.5159	0.4957	0.4837	0.7104	0.6514	0.5886	0.663
Cre09.g394150.v5.5:s:2056271-2056818	N3	chromosome_9:2056062-2056339	0.0564	0.0001	0.0001	0.0101	0.0001	0.0001	0.0278	0.0001	0.0902	0.0157	0.0129	0.009	0.0665	0.0239	0.0001	0.035	0.0001	0.0539	0.0488	0.0001	0.2157	0.0716	0.0338	0.1102	0.0335	0.1024	0.16
Cre09.g394547.v5.5:t:4259299-4259422	N3	chromosome_9:4259234-4259322	0.1464	0.1048	0.1133	0.0653	0.2016	0.0476	0.0602	0.032	0.0833	0.0939	0.0776	0.0813	0.0797	0.1317	0.0685	0.0922	0.0001	0.027	0.0074	0.0432	0.049	0.0555	0.0324	0.041	0.041	0.0963	0.0548
Cre09.g394621.v5.5:s:4279152-4279310	N3	chromosome_9:4279310-4279641	0.0361	0.0395	0.0466	0.024	0.0065	0.0321	0.0328	0.0223	0.0236	0.0625	0.0123	0.0321	0.0475	0.0083	0.0406	0.0465	0.0236	0.0049	0.0524	0.0257	0.013	0.0341	0.0471	0.0537	0.0137	0.0364	0.0419
Cre09.g394621.v5.5:t:4281041-4281109	N1	chromosome_9:4280254-4281041	0.5837	0.6009	0.7466	0.533	0.0001	0.4965	0.4251	0.0001	0.0001	0.5099	0.5513	0.4283	0.5014	0.4798	0.456	0.3808	0.0001	0.4168	0.121	0.3677	0.3939	0.3867	0.4623	0.3143	0.4545	0.4218	0.4871
Cre09.g394658.v5.5:t:4286646-4286745	N3	chromosome_9:4286745-4286973	0.0001	0.0001	0.0001	0.0001	0.0001	0.0001	0.0001	0.0001	0.0001	0.0001	0.0533	0.1197	0.0001	0.0252	0.0001	0.0535	0.0001	0.021	0.0001	0.0001	0.0001	0.0001	0.0001	0.0001	0.0001	0.0001	0.0001
Cre09.g394806.v5.5:t:4310678-4310875	N3	chromosome_9:4310434-4310678	0.0001	0.0001	0.0001	0.0001	0.0001	0.0001	0.0001	0.0001	0.0001	0.0001	0.0001	0.0001	0.0001	0.0001	0.0001	0.0001	0.0001	0.0001	0.0001	0.0001	0.0001	0.0001	0.0001	0.0001	0.0001	0.1106	0.0001
Cre09.g394843.v5.5:s:4314958-4316596	N3	chromosome_9:4314744-4314958	0.2333	0.0001	0.0313	0.1509	0.0001	0.0753	0.0001	0.0444	0.0125	0.0188	0.0304	0.0716	0.0357	0.0227	0.0239	0.0135	0.0001	0.0192	0.0216	0.0001	0.0417	0.0313	0.0666	0.0754	0.1004	0.0001	0.0001
Cre09.g395176.v5.5:t:4366761-4366833	N3	chromosome_9:4366339-4366761	0.1244	0.033	0.0261	0.0385	0.0001	0.0001	0.0001	0.0451	0.0001	0.0001	0.0186	0.1092	0.025	0.0279	0.0556	0.0859	0.0786	0.0365	0.0633	0.011	0.0236	0.0124	0.0068	0.0968	0.0773	0.0816	0.0148
Cre09.g395176.v5.5:t:4366974-4367162	N4	chromosome_9:4366829-4367027	0.0001	0.0001	0.0001	0.0001	0.0001	0.0001	0.0001	0.0001	0.0001	0.0001	0.0001	0.3618	0.0001	0.0001	0.0001	0.4165	0.0001	0.5737	0.3073	0.2599	0.2662	0.2492	0.4657	0.2321	0.2605	0.4698	0.0001
Cre09.g395176.v5.5:t:4367485-4367861	N7	chromosome_9:4367162-4367491	0.0001	0.0001	0.0001	0.0001	0.0001	0.0001	0.0001	0.0001	0.0001	0.0001	0.0001	0.078	0.0001	0.0001	0.0001	0.119	0.0001	0.0903	0.2552	0.0671	0.0001	0.119	0.083	0.222	0.2118	0.0481	0.056
Cre09.g395436.v5.5:s:4404700-4404757	N6	chromosome_9:4403266-4404700	0.298	0.1556	0.1387	0.1108	0.1062	0.1206	0.2951	0.1659	0.3365	0.2813	0.176	0.1264	0.2275	0.0274	0.1507	0.2405	0.3109	0.2358	0.2372	0.3207	0.3136	0.4081	0.3242	0.2776	0.3559	0.3636	0.5622
Cre09.g395436.v5.5:t:4403215-4403266	N4	chromosome_9:4403266-4404700	0.2721	0.0001	0.0771	0.0796	0.0842	0.0834	0.2327	0.1387	0.2159	0.2181	0.1365	0.1609	0.1985	0.0317	0.1088	0.1854	0.1847	0.1632	0.2174	0.2819	0.1766	0.2567	0.2452	0.1887	0.2708	0.2607	0.4374
Cre09.g395769.v5.5:s:4496945-4497257	N7	chromosome_9:4496447-4496978	0.0001	0.0001	0.0001	0.1635	0.0001	0.0001	0.0001	0.0001	0.0784	0.0261	0.1008	0.0572	0.0001	0.0929	0.0887	0.1949	0.2237	0.1779	0.1615	0.1178	0.1736	0.1992	0.1109	0.1306	0.1276	0.0797	0.1539
Cre09.g395769.v5.5:t:4496945-4497257	N3	chromosome_9:4497107-4497385	0.0001	0.0001	0.0001	0.0103	0.0001	0.0146	0.0001	0.0126	0.0001	0.0001	0.0103	0.0073	0.108	0.0228	0.0299	0.0464	0.0451	0.1703	0.0157	0.0635	0.0566	0.0334	0.0623	0.0287	0.0396	0.0448	0.0341
Cre09.g395806.v5.5:t:4501863-4502301	N3	chromosome_9:4502301-4502379	0.0001	0.0001	0.0001	0.0001	0.0001	0.0001	0.0001	0.0001	0.0001	0.0001	0.0001	0.1806	0.0001	0.0001	0.0001	0.0001	0.0001	0.0001	0.0001	0.0001	0.0001	0.0001	0.0001	0.0001	0.0001	0.0001	0.0001
Cre09.g396050.v5.5:t:1819685-1819742	N3	chromosome_9:1819391-1819691	0.0139	0.0001	0.0001	0.0232	0.0001	0.0001	0.0001	0.0333	0.0001	0.0001	0.0001	0.0288	0.0001	0.0001	0.0196	0.0209	0.0001	0.0212	0.0214	0.0001	0.0174	0.0584	0.0812	0.0363	0.0575	0.0565	0.0634
[truncated: 1,419 more rows]
